# Supplementary material for: DNA methylation GrimAge version 2
Source: Aging (Albany NY). 2022 Dec 14;14(23):9484–549. doi: 10.18632/aging.204434 (PMC9792204; doi:10.18632/aging.204434)
Supplement: Supplementary Table 2.2 [file aging-14-204434-s004.xlsx]

## Sheet: Table S2.2
Supplementary Table 2.2. AgeAccelGrim:Diet, clinically relevant measurements, and life style factors.
AgeAccel	order	category	var	NumData	n	Meta.bicor	Meta.bicor.Z	Meta.P	Meta.log10P	bicor.FHS	p.FHS	bicor.WHI	p.WHI	bicor.JHS	p.JHS	bicor.InChianti	p.InChianti	bicor.BLSA	p.BLSA	bicor.LBC21	p.LBC21	bicor.LBC36	p.LBC36	bicor.NAS	p.NAS
AgeAccelGrim	1	Diet	log2(Total energy)	2	4221	-0.0185177	-1.20235	0.229227	0.639734			-0.0132931	0.434238									-0.0424443	0.243329
AgeAccelGrim	2	Diet	Carbohydrate	2	4222	-0.0968156	-6.3101	2.78857e-10	9.55462			-0.115355	9.44572e-12									-0.0114557	0.752465
AgeAccelGrim	3	Diet	Protein	2	4221	-0.00810572	-0.526108	0.598813	0.222709			0.00230012	0.892421									-0.0557174	0.125632
AgeAccelGrim	4	Diet	Fat	2	4221	0.0597005	3.88088	0.000104079	3.98264			0.0771984	5.40294e-06									-0.0208365	0.567157
AgeAccelGrim	5	Diet	log2(1+Red meat)	3	4873	0.0323051	2.256	0.0240705	1.61851	-0.0943233	0.0160614	0.0541847	0.0014149									0.0410175	0.259446
AgeAccelGrim	6	Diet	log2(1+Poultry)	3	4832	0.00582971	0.404842	0.685593	0.163933	0.0486743	0.215287	0.00535419	0.752814									-0.0307215	0.411473
AgeAccelGrim	7	Diet	log2(1+Fish)	3	4873	-0.027091	-1.89003	0.0587545	1.23096	-0.0943233	0.0160614	-0.0181143	0.286628									-0.0102308	0.778539
AgeAccelGrim	8	Diet	log2(1+Dairy)	3	4868	-0.0432705	-3.01694	0.00255337	2.59289	-0.00954152	0.808938	-0.0479832	0.00474884									-0.0503327	0.166297
AgeAccelGrim	9	Diet	log2(1+Whole grains)	2	4108	-0.0544708	-3.49151	0.000480293	3.31849	0.00780213	0.843399	-0.0659839	0.000102106
AgeAccelGrim	10	Diet	log2(1+Nuts)	1	3463	-0.0270451	-1.59056	0.111709	0.951913			-0.0270451	0.111709
AgeAccelGrim	11	Diet	log2(Fruits)	3	4864	-0.0981919	-6.87305	6.28454e-12	11.2017	-0.0362338	0.359796	-0.0940549	2.75217e-08									-0.168289	2.9895e-06
AgeAccelGrim	12	Diet	log2(Vegetables)	3	4864	-0.0552153	-3.85062	0.000117817	3.92879	0.0142981	0.717886	-0.0595442	0.000456145									-0.0939018	0.0096594
AgeAccelGrim	14	Diet	log(OMEGA3)	1	643	-0.01814	-0.458756	0.64641	0.189492	-0.01814	0.64641
AgeAccelGrim	15	Diet	log(VitaminA)	1	651	-0.0298498	-0.760289	0.447082	0.349613	-0.0298498	0.447082
AgeAccelGrim	16	Diet	log(VitaminC)	2	1409	-0.0922021	-3.47155	0.000517471	3.28611	0.0107291	0.784912											-0.17864	7.09164e-07
AgeAccelGrim	17	Diet	log(VitaminB6)	2	1407	-0.0801807	-3.00719	0.00263672	2.57894	-0.0357424	0.363808											-0.117873	0.0011465
AgeAccelGrim	18	Diet	log(VitaminE)	2	1397	-0.0857471	-3.2092	0.00133104	2.87581	-0.0338048	0.393836											-0.128975	0.000362339
AgeAccelGrim	19	Diet	log(Selenium)	2	1401	-0.0660821	-2.47145	0.0134568	1.87106	-0.0265826	0.50137											-0.0993715	0.0061863
AgeAccelGrim	20	Diet	log(Iron)	1	633	-0.00335402	-0.0841487	0.932938	0.0301471	-0.00335402	0.932938
AgeAccelGrim	21	Diet	log(Zinc)	2	1404	-0.0571003	-2.13739	0.0325664	1.48723	-0.0235422	0.550548											-0.0855555	0.0184799
AgeAccelGrim	22	Diet	log(Calcium)	2	1407	-0.0948026	-3.55761	0.000374248	3.42684	-0.108983	0.00544526											-0.0826317	0.0229232
AgeAccelGrim	23	Diet	log(FolicAcid)	2	1407	-0.0999921	-3.75578	0.0001728	3.76246	-0.0495825	0.207482											-0.142608	8.04446e-05
AgeAccelGrim	24	Diet	log(VitaminD)	2	1397	-0.0599384	-2.23824	0.0252052	1.59851	-0.0655595	0.0976423											-0.0551927	0.1291
AgeAccelGrim	25	Diet	log(Copper)	1	643	-0.0214277	-0.541951	0.587852	0.230732	-0.0214277	0.587852
AgeAccelGrim	26	Diet	log(BrewYeast)	1	643	0.0138152	0.349815	0.726478	0.138778	0.0138152	0.726478
AgeAccelGrim	27	Diet	log(BetaCaroteneSup)	1	645	-0.00452552	-0.114623	0.908744	0.0415585	-0.00452552	0.908744
AgeAccelGrim	28	Diet	log(Magnesium)	1	641	0.0210189	0.530817	0.595545	0.225085	0.0210189	0.595545
AgeAccelGrim	29	Dietary Biomarkers	Retinol	1	2053	0.0330061	1.49595	0.134667	0.870738			0.0330061	0.134667
AgeAccelGrim	30	Dietary Biomarkers	Mean carotenoids	1	2052	-0.254743	-11.788	4.50232e-32	31.3466			-0.254743	4.50232e-32
AgeAccelGrim	31	Dietary Biomarkers	Lycopene	1	2053	-0.071912	-3.26045	0.00111237	2.95375			-0.071912	0.00111237
AgeAccelGrim	32	Dietary Biomarkers	log2(alpha-Carotene)	1	2053	-0.246957	-11.411	3.68296e-30	29.4338			-0.246957	3.68296e-30
AgeAccelGrim	33	Dietary Biomarkers	log2(beta-Carotene)	1	2052	-0.222113	-10.2175	1.65539e-24	23.7811			-0.222113	1.65539e-24
AgeAccelGrim	34	Dietary Biomarkers	log2(Lutein+Zeaxanthin)	1	2053	-0.162602	-7.42523	1.1258e-13	12.9485			-0.162602	1.1258e-13
AgeAccelGrim	35	Dietary Biomarkers	log2(beta-Cryptoxanthin)	1	2053	-0.216679	-9.96917	2.07968e-23	22.682			-0.216679	2.07968e-23
AgeAccelGrim	36	Dietary Biomarkers	log2(alpha-Tocopherol)	1	2053	-0.0476563	-2.15923	0.0308325	1.51099			-0.0476563	0.0308325
AgeAccelGrim	37	Dietary Biomarkers	log2(gamma-Tocopherol)	1	2053	0.115917	5.26915	1.37059e-07	6.86309			0.115917	1.37059e-07
AgeAccelGrim	38	Measurements	log(A1C)	1	711	0.159247	4.27077	1.94798e-05	4.71042	0.159247	1.94798e-05
AgeAccelGrim	39	Measurements	log2(C-reactive protein)	8	11281	0.261644	28.4417	6.18073e-178	177.209	0.346264	9.28285e-22	0.261747	4.80046e-44	0.234584	1.97474e-23	0.223292	1.2144e-17	0.188901	9.17612e-08	0.239418	0.00152971	0.294529	1.20358e-50	0.274018	3.36351e-24
AgeAccelGrim	40	Measurements	log2(Insulin)	3	5912	0.107598	8.31316	9.31867e-17	16.0306			0.145662	1.07249e-19			-0.0688474	0.0677559							0.0903683	0.000801372
AgeAccelGrim	41	Measurements	log2(Glucose)	5	7392	0.0899138	7.76537	8.14041e-15	14.0894	0.170391	4.74729e-06	0.130347	2.13171e-16			0.0262796	0.322544	0.151029	5.30628e-05					-0.182123	4.93336e-06
AgeAccelGrim	42	Measurements	log2(Triglyceride)	6	9847	0.144716	14.4497	2.51876e-47	46.5988	0.207027	2.38403e-08	0.161733	1.51885e-24	0.106793	1.55535e-05	0.0913312	0.00056907	0.18294	2.38833e-07					0.140583	1.72662e-07
AgeAccelGrim	43	Measurements	Total cholesterol	8	13002	-0.0618046	-7.06081	1.65532e-12	11.7811	-0.0698277	0.0630707	0.0177016	0.266921	-0.0572415	0.0208621	-0.00919232	0.729508	-0.102194	0.00415819	-0.194795	5.14933e-05	-0.13775	4.49309e-13	-0.126736	2.4882e-06
AgeAccelGrim	44	Measurements	LDL cholesterol	4	7688	-0.0319072	-2.79901	0.00512601	2.29022			0.0023837	0.88206	-0.0851305	0.000607808	-0.0144149	0.588022	-0.122307	0.000596573
AgeAccelGrim	45	Measurements	HDL cholesterol	6	9844	-0.0950619	-9.4559	3.20247e-21	20.4945	-0.16867	6.09986e-06	-0.109659	5.30908e-12	-0.019652	0.427753	-0.0663427	0.0123699	-0.105526	0.00310121					-0.127388	2.22534e-06
AgeAccelGrim	46	Measurements	log2(Creatinine)	3	4770	0.0241286	1.66521	0.0958714	1.01831	0.00941978	0.802339	0.00585843	0.763521			0.0653954	0.01375
AgeAccelGrim	47	Measurements	log2(IL6)	3	3185	0.12927	7.33328	2.24591e-13	12.6486							0.172041	5.82617e-11	0.125174	0.000440682					0.069409	0.0298033
AgeAccelGrim	48	Measurements	log2(TNFA)	3	2621	0.118287	6.08021	1.20026e-09	8.92073							0.159564	1.80732e-09	-0.0501109	0.44135					0.0991194	0.00188225
AgeAccelGrim	49	Measurements	log2(Urine Creatinine)	3	1793	-0.000406881	-0.0171942	0.986282	0.00599902	-0.00259039	0.94546			-0.0758037	0.134658	0.0437878	0.247026
AgeAccelGrim	50	Measurements	FEV1	5	5836	-0.294958	-23.234	2.06584e-119	118.685	-0.28261	1.82926e-12							-0.133052	0.00115607	-0.23481	3.82986e-10	-0.311082	2.34152e-64	-0.370638	4.36562e-40
AgeAccelGrim	52	Measurements	Systolic blood pressure	6	11980	0.0243722	2.6679	0.00763274	2.11732	0.0722541	0.0542626	0.0512202	0.00126471	0.0460568	0.0546549	0.0282383	0.288841					-0.0341528	0.0710528	0.00969955	0.72002
AgeAccelGrim	53	Measurements	Diastolic blood pressure	6	11980	-0.0387588	-4.24197	2.21565e-05	4.6545	-0.00753818	0.841223	-0.0371016	0.0195666	-0.0334773	0.162628	0.0029351	0.912398					-0.0476319	0.0118022	-0.0908709	0.000765753
AgeAccelGrim	54	Measurements	log2(Waist / hip ratio)	3	5887	0.18189	14.1046	3.55906e-45	44.4487	0.243665	5.02194e-11	0.184237	1.2541e-30											0.142906	1.08476e-07
AgeAccelGrim	55	Measurements	BMI	8	13420	0.10379	12.0697	1.52765e-33	32.816	0.217316	4.52782e-09	0.116238	2.50673e-13	0.0445564	0.0618588	0.0679761	0.0109477	0.158399	7.72061e-06	0.0350445	0.359681	0.104312	3.23816e-08	0.121245	6.63209e-06
AgeAccelGrim	56	Measurements	MMSE	6	7017	-0.0978865	-8.22705	1.91878e-16	15.717	-0.159181	1.94921e-05	-0.0387577	0.263064			-0.0847253	0.00131531	-0.0695362	0.0979782	-0.110638	0.00361643	-0.109022	7.302e-09
AgeAccelGrim	57	Measurements	Telomere length	3	2193	-0.130523	-6.14636	7.92809e-10	9.10083	-0.0657959	0.306006	-0.222377	1.06832e-10											-0.0759688	0.0106312
AgeAccelGrim	58	Life style	Education	8	13312	-0.094521	-10.9362	7.73823e-28	27.1114	-0.148008	0.000311799	-0.092484	6.34472e-09	-0.104081	1.30592e-05	-0.0236028	0.373894	-0.0707016	0.0484283	-0.116743	0.00211466	-0.105963	1.76061e-08	-0.117017	1.44179e-05
AgeAccelGrim	59	Life style	Income	3	6687	-0.116259	-9.54817	1.32004e-21	20.8794			-0.106476	3.66591e-11	-0.18881	1.32232e-13									-0.0614178	0.0243448
AgeAccelGrim	60	Life style	Hand grip	5	5962	-0.0817612	-6.32532	2.52705e-10	9.59739	-0.0812681	0.0599658					-0.0458913	0.0970315	-0.0861799	0.0220357	-0.116249	0.00350086	-0.0897068	2.02376e-06
AgeAccelGrim	61	Life style	log2(1+Exercise)	4	7278	-0.104371	-8.93293	4.14875e-19	18.3821			-0.0855581	1.73595e-07	-0.121929	3.14658e-07			-0.117419	0.00197204					-0.130857	1.01978e-05
AgeAccelGrim	62	Life style	Current smoker	6	10247	0.362312	38.4652	0	322.968	0.328853	1.03356e-19	0.381931	1.88441e-139					0.190047	8.73304e-08	0.339214	1.84646e-20	0.430785	4.20342e-131	0.275605	3.1058e-25
AgeAccelGrim	63	Life style	log2(1+Alcohol)	5	8050	0.0394163	3.5402	0.000399821	3.39813	0.0379913	0.311938	0.0131068	0.44058	0.113202	2.8403e-06	0.0424331	0.108582					-0.0114517	0.752921
