# Supplementary material for: DNA methylation GrimAge version 2
Source: Aging (Albany NY). 2022 Dec 14;14(23):9484–549. doi: 10.18632/aging.204434 (PMC9792204; doi:10.18632/aging.204434)
Supplement: Supplementary Table 2.3 [file aging-14-204434-s005.xlsx]

## Sheet: Table S2.3
Supplementary Table 2.3. AgeAccelGrim2:Diet, clinically relevant measurements, and life style factors.
AgeAccel	order	category	var	NumData	n	Meta.bicor	Meta.bicor.Z	Meta.P	Meta.log10P	bicor.FHS	p.FHS	bicor.WHI	p.WHI	bicor.JHS	p.JHS	bicor.InChianti	p.InChianti	bicor.BLSA	p.BLSA	bicor.LBC21	p.LBC21	bicor.LBC36	p.LBC36	bicor.NAS	p.NAS
AgeAccelGrim2	1	Diet	log2(Total energy)	2	4221	-0.0123932	-0.80463	0.421033	0.375684			-0.00616177	0.71704									-0.0409153	0.260655
AgeAccelGrim2	2	Diet	Carbohydrate	2	4222	-0.105693	-6.89471	5.39751e-12	11.2678			-0.126037	9.19128e-14									-0.0120596	0.739613
AgeAccelGrim2	3	Diet	Protein	2	4221	0.000500113	0.0324601	0.974105	0.0113942			0.01162	0.494446									-0.0503994	0.166009
AgeAccelGrim2	4	Diet	Fat	2	4221	0.0745416	4.84957	1.23728e-06	5.90753			0.0939736	2.9832e-08									-0.0150856	0.678669
AgeAccelGrim2	5	Diet	log2(1+Red meat)	3	4873	0.0486443	3.39985	0.000674223	3.1712	-0.0987084	0.0117079	0.0789954	3.19189e-06									0.0361672	0.320117
AgeAccelGrim2	6	Diet	log2(1+Poultry)	3	4832	-0.00279902	-0.194397	0.845865	0.0726989	0.0540696	0.168615	-0.0071905	0.672305									-0.0331139	0.375979
AgeAccelGrim2	7	Diet	log2(1+Fish)	3	4873	-0.0351472	-2.45276	0.0141763	1.84844	-0.0987084	0.0117079	-0.0283091	0.0957585									-0.0116126	0.749601
AgeAccelGrim2	8	Diet	log2(1+Dairy)	3	4868	-0.0452728	-3.15678	0.00159522	2.79718	-0.0201664	0.609321	-0.0518462	0.00227752									-0.0364783	0.315919
AgeAccelGrim2	9	Diet	log2(1+Whole grains)	2	4108	-0.0538927	-3.45477	0.000550764	3.25903	0.0170682	0.66557	-0.0670145	7.92952e-05
AgeAccelGrim2	10	Diet	log2(1+Nuts)	1	3463	-0.0458624	-2.69859	0.0069634	2.15718			-0.0458624	0.0069634
AgeAccelGrim2	11	Diet	log2(Fruits)	3	4864	-0.104401	-7.30975	2.67647e-13	12.5724	-0.0350759	0.375304	-0.100024	3.4313e-09									-0.181478	4.53365e-07
AgeAccelGrim2	12	Diet	log2(Vegetables)	3	4864	-0.0659912	-4.60504	4.1238e-06	5.3847	0.0147469	0.709426	-0.068677	5.23863e-05									-0.121376	0.000803122
AgeAccelGrim2	14	Diet	log(OMEGA3)	1	643	-0.0342863	-0.867176	0.385846	0.413587	-0.0342863	0.385846
AgeAccelGrim2	15	Diet	log(VitaminA)	1	651	-0.0357466	-0.910509	0.362554	0.440627	-0.0357466	0.362554
AgeAccelGrim2	16	Diet	log(VitaminC)	2	1409	-0.107737	-4.05992	4.90896e-05	4.30901	-0.00928141	0.81333											-0.190202	1.24054e-07
AgeAccelGrim2	17	Diet	log(VitaminB6)	2	1407	-0.0683327	-2.56189	0.0104106	1.98253	-0.0159489	0.685413											-0.11277	0.00187187
AgeAccelGrim2	18	Diet	log(VitaminE)	2	1397	-0.0849352	-3.17782	0.00148389	2.8286	-0.0434877	0.272545											-0.119503	0.000961501
AgeAccelGrim2	19	Diet	log(Selenium)	2	1401	-0.0674963	-2.52552	0.0115526	1.93732	-0.0221462	0.575257											-0.1057	0.00357117
AgeAccelGrim2	20	Diet	log(Iron)	1	633	-0.015186	-0.381115	0.703118	0.152972	-0.015186	0.703118
AgeAccelGrim2	21	Diet	log(Zinc)	2	1404	-0.0538798	-2.01642	0.0437563	1.35896	-0.0211495	0.59186											-0.0816298	0.0246175
AgeAccelGrim2	22	Diet	log(Calcium)	2	1407	-0.0854461	-3.20537	0.0013489	2.87002	-0.103108	0.00857469											-0.0702896	0.0530683
AgeAccelGrim2	23	Diet	log(FolicAcid)	2	1407	-0.108538	-4.07815	4.53954e-05	4.34299	-0.0683193	0.0822217											-0.142575	8.06298e-05
AgeAccelGrim2	24	Diet	log(VitaminD)	2	1397	-0.0643926	-2.40549	0.0161507	1.79181	-0.0782106	0.0480629											-0.0527261	0.146955
AgeAccelGrim2	25	Diet	log(Copper)	1	643	-0.0282624	-0.714831	0.474714	0.323568	-0.0282624	0.474714
AgeAccelGrim2	26	Diet	log(BrewYeast)	1	643	-0.00359432	-0.0910323	0.927467	0.0327016	-0.00359432	0.927467
AgeAccelGrim2	27	Diet	log(BetaCaroteneSup)	1	645	0.00408679	0.10351	0.917558	0.0373664	0.00408679	0.917558
AgeAccelGrim2	28	Diet	log(Magnesium)	1	641	0.0189459	0.478399	0.632366	0.199031	0.0189459	0.632366
AgeAccelGrim2	29	Dietary Biomarkers	Retinol	1	2053	0.00308486	0.139743	0.888863	0.0511653			0.00308486	0.888863
AgeAccelGrim2	30	Dietary Biomarkers	Mean carotenoids	1	2052	-0.290632	-13.5461	8.35193e-42	41.0782			-0.290632	8.35193e-42
AgeAccelGrim2	31	Dietary Biomarkers	Lycopene	1	2053	-0.0922396	-4.18745	2.82108e-05	4.54958			-0.0922396	2.82108e-05
AgeAccelGrim2	32	Dietary Biomarkers	log2(alpha-Carotene)	1	2053	-0.280192	-13.0272	8.56763e-39	38.0671			-0.280192	8.56763e-39
AgeAccelGrim2	33	Dietary Biomarkers	log2(beta-Carotene)	1	2052	-0.25659	-11.872	1.65561e-32	31.781			-0.25659	1.65561e-32
AgeAccelGrim2	34	Dietary Biomarkers	log2(Lutein+Zeaxanthin)	1	2053	-0.186565	-8.54578	1.27667e-17	16.8939			-0.186565	1.27667e-17
AgeAccelGrim2	35	Dietary Biomarkers	log2(beta-Cryptoxanthin)	1	2053	-0.243688	-11.2628	2.00266e-29	28.6984			-0.243688	2.00266e-29
AgeAccelGrim2	36	Dietary Biomarkers	log2(alpha-Tocopherol)	1	2053	-0.0746249	-3.38538	0.000710791	3.14826			-0.0746249	0.000710791
AgeAccelGrim2	37	Dietary Biomarkers	log2(gamma-Tocopherol)	1	2053	0.153012	6.97797	2.99481e-12	11.5236			0.153012	2.99481e-12
AgeAccelGrim2	38	Measurements	log(A1C)	1	711	0.187332	5.04059	4.64094e-07	6.33339	0.187332	4.64094e-07
AgeAccelGrim2	39	Measurements	log2(C-reactive protein)	8	11281	0.322286	35.4802	9.94087e-276	275.003	0.403889	6.32738e-30	0.331127	1.8501e-71	0.3035	4.49951e-39	0.275819	1.57877e-26	0.249219	1.1205e-12	0.264419	0.000429564	0.347185	2.81842e-71	0.334815	5.42127e-36
AgeAccelGrim2	40	Measurements	log2(Insulin)	3	5912	0.147144	11.4135	3.5816e-30	29.4459			0.196548	6.48739e-35			-0.0373226	0.322432							0.100289	0.000197564
AgeAccelGrim2	41	Measurements	log2(Glucose)	5	7392	0.120212	10.4034	2.39241e-25	24.6212	0.185496	6.03775e-07	0.162832	7.51852e-25			0.0569986	0.0318072	0.18377	7.95011e-07					-0.155932	9.54523e-05
AgeAccelGrim2	42	Measurements	log2(Triglyceride)	6	9847	0.167079	16.7271	8.31402e-63	62.0802	0.242	5.32824e-11	0.186133	3.79051e-32	0.120767	1.00103e-06	0.0968174	0.000257991	0.22645	1.22212e-10					0.164508	8.92771e-10
AgeAccelGrim2	43	Measurements	Total cholesterol	8	13002	-0.0869928	-9.95282	2.45128e-23	22.6106	-0.0882076	0.0187516	-0.0040535	0.79933	-0.0774036	0.0017702	-0.0426154	0.108612	-0.114083	0.00135808	-0.236409	7.64127e-07	-0.168679	5.88141e-19	-0.151724	1.62779e-08
AgeAccelGrim2	44	Measurements	LDL cholesterol	4	7688	-0.0495529	-4.34939	1.36517e-05	4.86481			-0.0145544	0.36489	-0.0999549	5.62037e-05	-0.0438374	0.0992521	-0.127855	0.000325793
AgeAccelGrim2	45	Measurements	HDL cholesterol	6	9844	-0.133632	-13.3368	1.41388e-40	39.8496	-0.211389	1.20263e-08	-0.158191	1.62636e-23	-0.0435271	0.0787342	-0.0937831	0.000398509	-0.14178	6.64693e-05					-0.164347	9.27486e-10
AgeAccelGrim2	46	Measurements	log2(Creatinine)	3	4770	0.0251403	1.73487	0.0827637	1.08216	0.0177976	0.636323	0.00945808	0.62717			0.0579404	0.0290699
AgeAccelGrim2	47	Measurements	log2(IL6)	3	3185	0.16109	9.17392	4.56131e-20	19.3409							0.220295	3.19941e-17	0.169709	1.71239e-06					0.0655222	0.0402908
AgeAccelGrim2	48	Measurements	log2(TNFA)	3	2621	0.115682	5.93983	2.8531e-09	8.54468							0.145356	4.44114e-08	0.00407852	0.950298					0.0994552	0.00181594
AgeAccelGrim2	49	Measurements	log2(Urine Creatinine)	3	1793	0.0219553	0.928235	0.353286	0.451874	0.0171014	0.651337			-0.0553357	0.275184	0.0697127	0.0650611
AgeAccelGrim2	50	Measurements	FEV1	5	5836	-0.31455	-24.886	1.05477e-136	135.977	-0.312519	4.37035e-15							-0.165861	4.87459e-05	-0.227338	1.39419e-09	-0.333553	1.70255e-74	-0.386645	9.29003e-44
AgeAccelGrim2	52	Measurements	Systolic blood pressure	6	11980	0.0292365	3.20178	0.00136583	2.8646	0.0713643	0.0572205	0.0734243	3.73594e-06	0.0485313	0.0428672	0.0146117	0.582684					-0.0391619	0.0384798	0.00936384	0.729323
AgeAccelGrim2	53	Measurements	Diastolic blood pressure	6	11980	-0.0378521	-4.14309	3.42657e-05	4.46514	-0.0211798	0.573453	-0.026852	0.0911643	-0.0381079	0.111916	0.00356614	0.89361					-0.0487756	0.00992226	-0.0979291	0.000286219
AgeAccelGrim2	54	Measurements	log2(Waist / hip ratio)	3	5887	0.225201	17.5733	3.94365e-69	68.4041	0.300978	2.27535e-16	0.2289	6.41464e-47											0.174394	8.09167e-11
AgeAccelGrim2	55	Measurements	BMI	8	13420	0.15274	17.8398	3.46726e-71	70.46	0.270331	1.82704e-13	0.167306	3.41001e-26	0.0978934	3.84948e-05	0.119197	7.68665e-06	0.221408	2.94993e-10	0.0687281	0.0722198	0.153104	3.69215e-16	0.152406	1.38448e-08
AgeAccelGrim2	56	Measurements	MMSE	6	7017	-0.104646	-8.79974	1.37129e-18	17.8629	-0.159601	1.85195e-05	-0.0607237	0.0794894			-0.0754447	0.0042098	-0.104821	0.0125807	-0.113065	0.00293304	-0.116412	6.36264e-10
AgeAccelGrim2	57	Measurements	Telomere length	3	2193	-0.125734	-5.91893	3.24044e-09	8.4894	-0.0468693	0.46636	-0.225985	5.32421e-11											-0.0678719	0.0225099
AgeAccelGrim2	58	Life style	Education	8	13312	-0.103648	-11.9983	3.62678e-33	32.4405	-0.152315	0.000207454	-0.107596	1.34597e-11	-0.102618	1.72693e-05	-0.0247147	0.351797	-0.0916314	0.0104663	-0.12165	0.00136432	-0.118162	3.25089e-10	-0.121925	6.16367e-06
AgeAccelGrim2	59	Life style	Income	3	6687	-0.122192	-10.0415	1.00096e-23	22.9996			-0.115801	5.97248e-13	-0.198371	6.74915e-15									-0.0532192	0.0511028
AgeAccelGrim2	60	Life style	Hand grip	5	5962	-0.0928888	-7.19247	6.36289e-13	12.1963	-0.108746	0.0117152					-0.0544832	0.0486546	-0.084506	0.0245872	-0.109068	0.00618626	-0.106233	1.77639e-08
AgeAccelGrim2	61	Life style	log2(1+Exercise)	4	7278	-0.120022	-10.2844	8.28662e-25	24.0816			-0.101677	5.10089e-10	-0.135068	1.41124e-08			-0.139941	0.000219319					-0.144621	1.05121e-06
AgeAccelGrim2	62	Life style	Current smoker	6	10247	0.349455	36.9628	4.54095e-299	298.343	0.320858	8.4384e-19	0.370374	2.47009e-130					0.188616	1.10053e-07	0.323924	1.25615e-18	0.414767	2.07036e-120	0.25946	1.87881e-22
AgeAccelGrim2	63	Life style	log2(1+Alcohol)	5	8050	0.0202122	1.81499	0.0695254	1.15786	0.035865	0.339955	-0.0140209	0.409433	0.106241	1.12306e-05	0.0261073	0.323605					-0.0433516	0.233346
