# Supplementary material for: DNA methylation GrimAge version 2
Source: Aging (Albany NY). 2022 Dec 14;14(23):9484–549. doi: 10.18632/aging.204434 (PMC9792204; doi:10.18632/aging.204434)
Supplement: Supplementary Table 2.4 [file aging-14-204434-s006.xlsx]

## Sheet: Table S2.4
Supplementary Table 2.4. DNAmADMAdjAge:Diet, clinically relevant measurements, and life style factors.
AgeAccel	order	category	var	NumData	n	Meta.bicor	Meta.bicor.Z	Meta.P	Meta.log10P	bicor.FHS	p.FHS	bicor.WHI	p.WHI	bicor.JHS	p.JHS	bicor.InChianti	p.InChianti	bicor.BLSA	p.BLSA	bicor.LBC21	p.LBC21	bicor.LBC36	p.LBC36	bicor.NAS	p.NAS
DNAmADMAdjAge	1	Diet	log2(Total energy)	2	4221	-0.00126858	-0.0823377	0.934378	0.0294773			0.00766411	0.65225									-0.0421485	0.246672
DNAmADMAdjAge	2	Diet	Carbohydrate	2	4222	-0.0697751	-4.5362	5.72778e-06	5.24201			-0.0731257	1.65028e-05									-0.0544058	0.134548
DNAmADMAdjAge	3	Diet	Protein	2	4221	-0.00256399	-0.166417	0.867829	0.0615658			0.00754607	0.657266									-0.0488246	0.179579
DNAmADMAdjAge	4	Diet	Fat	2	4221	0.0376903	2.44798	0.0143659	1.84267			0.0527888	0.00189198									-0.0315691	0.385694
DNAmADMAdjAge	5	Diet	log2(1+Red meat)	3	4873	0.0295518	2.06183	0.0392242	1.40645	-0.000388236	0.992121	0.0533115	0.00170191									-0.0536528	0.140037
DNAmADMAdjAge	6	Diet	log2(1+Poultry)	3	4832	0.000671842	0.0466539	0.962789	0.0164688	0.0514603	0.189464	9.97906e-05	0.995319									-0.042754	0.252989
DNAmADMAdjAge	7	Diet	log2(1+Fish)	3	4873	-0.0123023	-0.857768	0.391021	0.4078	-0.000388236	0.992121	-0.014088	0.40738									-0.0143297	0.693606
DNAmADMAdjAge	8	Diet	log2(1+Dairy)	3	4868	0.000457019	0.0318442	0.974596	0.0111753	0.0375787	0.340786	-0.00597629	0.725285									-0.00167839	0.963216
DNAmADMAdjAge	9	Diet	log2(1+Whole grains)	2	4108	-0.0262016	-1.67813	0.0933217	1.03002	0.0157034	0.690908	-0.0339647	0.0457045
DNAmADMAdjAge	10	Diet	log2(1+Nuts)	1	3463	-0.00521232	-0.306491	0.759231	0.119626			-0.00521232	0.759231
DNAmADMAdjAge	11	Diet	log2(Fruits)	3	4864	-0.0312413	-2.17883	0.0293445	1.53247	0.0524907	0.184469	-0.0375927	0.0268776									-0.072787	0.0450204
DNAmADMAdjAge	12	Diet	log2(Vegetables)	3	4864	-0.0144299	-1.00553	0.314642	0.502183	0.0704781	0.0743248	-0.0272058	0.109595									-0.0279929	0.441535
DNAmADMAdjAge	14	Diet	log(OMEGA3)	1	643	0.00774564	0.195808	0.844761	0.0732664	0.00774564	0.844761
DNAmADMAdjAge	15	Diet	log(VitaminA)	1	651	0.00268766	0.0684169	0.945454	0.0243597	0.00268766	0.945454
DNAmADMAdjAge	16	Diet	log(VitaminC)	2	1409	-0.0405509	-1.52009	0.128489	0.891133	0.00691333	0.860328											-0.0811466	0.0255342
DNAmADMAdjAge	17	Diet	log(VitaminB6)	2	1407	-0.055696	-2.08549	0.0370252	1.4315	-0.0469156	0.233097											-0.0631979	0.0822566
DNAmADMAdjAge	18	Diet	log(VitaminE)	2	1397	-0.00532285	-0.198527	0.842632	0.0743619	0.0369118	0.35184											-0.0409174	0.260924
DNAmADMAdjAge	19	Diet	log(Selenium)	2	1401	-0.0431182	-1.6117	0.107027	0.970506	-0.0114029	0.773003											-0.0699175	0.054351
DNAmADMAdjAge	20	Diet	log(Iron)	1	633	0.0649722	1.63201	0.102677	0.988526	0.0649722	0.102677
DNAmADMAdjAge	21	Diet	log(Zinc)	2	1404	-0.0347323	-1.30154	0.193074	0.714275	-0.0130214	0.740143											-0.0533756	0.142348
DNAmADMAdjAge	22	Diet	log(Calcium)	2	1407	-0.0148619	-0.555956	0.578241	0.237891	-0.0028332	0.942637											-0.0251479	0.489762
DNAmADMAdjAge	23	Diet	log(FolicAcid)	2	1407	-0.0390864	-1.46348	0.143335	0.843648	-0.0145093	0.712285											-0.0600926	0.0985066
DNAmADMAdjAge	24	Diet	log(VitaminD)	2	1397	-0.0150386	-0.560545	0.575108	0.240251	-0.00514801	0.89678											-0.0233655	0.521055
DNAmADMAdjAge	25	Diet	log(Copper)	1	643	0.0424835	1.07479	0.282469	0.549029	0.0424835	0.282469
DNAmADMAdjAge	26	Diet	log(BrewYeast)	1	643	-0.0183705	-0.465005	0.641928	0.192514	-0.0183705	0.641928
DNAmADMAdjAge	27	Diet	log(BetaCaroteneSup)	1	645	-0.0217483	-0.550731	0.581818	0.235213	-0.0217483	0.581818
DNAmADMAdjAge	28	Diet	log(Magnesium)	1	641	0.0738633	1.86777	0.061794	1.20905	0.0738633	0.061794
DNAmADMAdjAge	29	Dietary Biomarkers	Retinol	1	2053	0.0338033	1.53249	0.125401	0.901699			0.0338033	0.125401
DNAmADMAdjAge	30	Dietary Biomarkers	Mean carotenoids	1	2052	-0.169914	-7.76257	8.32225e-15	14.0798			-0.169914	8.32225e-15
DNAmADMAdjAge	31	Dietary Biomarkers	Lycopene	1	2053	-0.0485743	-2.20063	0.0277622	1.55655			-0.0485743	0.0277622
DNAmADMAdjAge	32	Dietary Biomarkers	log2(alpha-Carotene)	1	2053	-0.145953	-6.65119	2.90731e-11	10.5365			-0.145953	2.90731e-11
DNAmADMAdjAge	33	Dietary Biomarkers	log2(beta-Carotene)	1	2052	-0.167754	-7.66054	1.85149e-14	13.7325			-0.167754	1.85149e-14
DNAmADMAdjAge	34	Dietary Biomarkers	log2(Lutein+Zeaxanthin)	1	2053	-0.12675	-5.76597	8.11903e-09	8.0905			-0.12675	8.11903e-09
DNAmADMAdjAge	35	Dietary Biomarkers	log2(beta-Cryptoxanthin)	1	2053	-0.147827	-6.74	1.58384e-11	10.8003			-0.147827	1.58384e-11
DNAmADMAdjAge	36	Dietary Biomarkers	log2(alpha-Tocopherol)	1	2053	-0.0345506	-1.56519	0.117539	0.929818			-0.0345506	0.117539
DNAmADMAdjAge	37	Dietary Biomarkers	log2(gamma-Tocopherol)	1	2053	0.0993776	4.5121	6.41897e-06	5.19253			0.0993776	6.41897e-06
DNAmADMAdjAge	38	Measurements	log(A1C)	1	711	0.10145	2.70899	0.00674889	2.17077	0.10145	0.00674889
DNAmADMAdjAge	39	Measurements	log2(C-reactive protein)	8	11281	0.186219	19.9973	5.81275e-89	88.2356	0.260935	1.358e-12	0.185841	1.55255e-22	0.235126	1.54358e-23	0.116256	1.14219e-05	0.156724	1.0052e-05	0.185	0.0154879	0.157621	4.91382e-15	0.223807	1.8042e-16
DNAmADMAdjAge	40	Measurements	log2(Insulin)	3	5912	0.109038	8.4234	3.65706e-17	16.4369			0.144804	1.7467e-19			-0.0457381	0.225311							0.0870814	0.00123827
DNAmADMAdjAge	41	Measurements	log2(Glucose)	5	7392	0.056206	4.8407	1.29386e-06	5.88811	0.138703	0.000202124	0.0890716	2.18492e-08			-0.028201	0.288574	0.102891	0.0060638					-0.108339	0.00688568
DNAmADMAdjAge	42	Measurements	log2(Triglyceride)	6	9847	0.0966312	9.61731	6.75755e-22	21.1702	0.170013	5.07309e-06	0.14411	9.21302e-20	0.0147779	0.551518	0.048385	0.0685221	0.109621	0.00210876					0.0594731	0.0276617
DNAmADMAdjAge	43	Measurements	Total cholesterol	8	13002	-0.0532937	-6.08076	1.19616e-09	8.92221	-0.0559253	0.136859	-0.000511066	0.97444	-0.088378	0.000354991	0.00695129	0.793781	-0.0702047	0.0495879	-0.14088	0.00361441	-0.0923117	1.32842e-06	-0.108213	5.9094e-05
DNAmADMAdjAge	44	Measurements	LDL cholesterol	4	7688	-0.0365445	-3.20425	0.00135414	2.86834			-0.023729	0.139739	-0.0897937	0.000299561	0.0124319	0.640319	-0.0781477	0.0289882
DNAmADMAdjAge	45	Measurements	HDL cholesterol	6	9844	-0.0815353	-8.0999	5.50028e-16	15.2596	-0.130734	0.000480299	-0.0876879	3.59614e-08	-0.055169	0.0259608	-0.0708774	0.00756517	-0.0726274	0.0421506					-0.0856653	0.00149901
DNAmADMAdjAge	46	Measurements	log2(Creatinine)	3	4770	0.0238262	1.64382	0.100213	0.999075	0.00308824	0.934677	0.0189679	0.329881			0.0431842	0.104059
DNAmADMAdjAge	47	Measurements	log2(IL6)	3	3185	0.0725721	4.09832	4.16152e-05	4.38075							0.0339898	0.200524	0.153331	1.63052e-05					0.0632957	0.0475994
DNAmADMAdjAge	48	Measurements	log2(TNFA)	3	2621	0.119439	6.12964	8.80801e-10	9.05512							0.139073	1.6854e-07	0.117024	0.0731612					0.0917989	0.00400663
DNAmADMAdjAge	49	Measurements	log2(Urine Creatinine)	3	1793	0.0103408	0.437138	0.662011	0.179135	-0.0542147	0.152196			0.00172316	0.972904	0.0793519	0.0356476
DNAmADMAdjAge	50	Measurements	FEV1	5	5836	-0.133041	-10.2182	1.64442e-24	23.784	-0.179235	1.1064e-05							-0.0676972	0.100345	-0.113993	0.00269956	-0.115667	9.54819e-10	-0.192505	2.09454e-11
DNAmADMAdjAge	52	Measurements	Systolic blood pressure	6	11980	0.0147765	1.61771	0.105725	0.97582	0.0930791	0.0130315	0.0580123	0.000258066	0.0457583	0.0562514	-0.0143429	0.590965					-0.0449	0.0176223	-0.0390113	0.149269
DNAmADMAdjAge	53	Measurements	Diastolic blood pressure	6	11980	-0.0172384	-1.88596	0.059301	1.22694	0.0247462	0.510641	-0.00741074	0.641192	-0.0268588	0.262712	0.00186052	0.94443					-0.00504943	0.789674	-0.0991472	0.0002399
DNAmADMAdjAge	54	Measurements	log2(Waist / hip ratio)	3	5887	0.136029	10.501	8.54401e-26	25.0683	0.228078	8.04357e-10	0.130675	4.87903e-16											0.10253	0.000143783
DNAmADMAdjAge	55	Measurements	BMI	8	13420	0.11429	13.298	2.37673e-40	39.624	0.190168	3.05605e-07	0.149275	4.30488e-21	0.14951	3.05303e-10	0.0496509	0.0631283	0.137513	0.00011042	0.0289059	0.449978	0.0908761	1.49558e-06	0.070106	0.00936213
DNAmADMAdjAge	56	Measurements	MMSE	6	7017	-0.0378324	-3.16806	0.00153457	2.81401	-0.0415569	0.268495	0.0312542	0.367328			-0.04967	0.0608002	-0.0372944	0.375215	-0.0375096	0.325653	-0.0516082	0.00636956
DNAmADMAdjAge	57	Measurements	Telomere length	3	2193	-0.0517648	-2.42292	0.0153963	1.81258	-0.0565183	0.379482	-0.102093	0.00344389											-0.0141257	0.635257
DNAmADMAdjAge	58	Life style	Education	8	13312	-0.0501127	-5.78194	7.38421e-09	8.1317	-0.0897371	0.0296475	-0.0462773	0.00373534	-0.0130866	0.585026	-0.0181137	0.49535	-0.0586062	0.102009	-0.0487684	0.201038	-0.0833514	1.00334e-05	-0.0520025	0.0545769
DNAmADMAdjAge	59	Life style	Income	3	6687	-0.0686879	-5.62214	1.88609e-08	7.72444			-0.0575228	0.000363393	-0.0884093	0.00059077									-0.0784148	0.00402127
DNAmADMAdjAge	60	Life style	Hand grip	5	5962	-0.0473604	-3.65621	0.000255971	3.59181	-0.114201	0.0080932					0.00715493	0.796135	-0.0830879	0.0276631	-0.112634	0.00471944	-0.0362228	0.0558598
DNAmADMAdjAge	61	Life style	log2(1+Exercise)	4	7278	-0.070814	-6.04638	1.48137e-09	8.82934			-0.0777836	2.09205e-06	-0.0427077	0.0744907			-0.0940691	0.0132352					-0.0769626	0.00965041
DNAmADMAdjAge	62	Life style	Current smoker	6	10247	0.0733222	7.42807	1.10194e-13	12.9578	0.120108	0.00131327	0.0659112	3.77587e-05					0.053296	0.137974	0.0335593	0.378793	0.102523	5.46838e-08	0.0413015	0.127076
DNAmADMAdjAge	63	Life style	log2(1+Alcohol)	5	8050	0.0142323	1.27586	0.202004	0.694641	0.0199121	0.596591	-0.0144847	0.394372	0.0599592	0.0137287	0.0175996	0.505931					0.0317627	0.382953
