# Supplementary material for: DNA methylation GrimAge version 2
Source: Aging (Albany NY). 2022 Dec 14;14(23):9484–549. doi: 10.18632/aging.204434 (PMC9792204; doi:10.18632/aging.204434)
Supplement: Supplementary Table 2.5 [file aging-14-204434-s007.xlsx]

## Sheet: Table S2.5
Supplementary Table 2.5. DNAmB2MAdjAge:Diet, clinically relevant measurements, and life style factors.
AgeAccel	order	category	var	NumData	n	Meta.bicor	Meta.bicor.Z	Meta.P	Meta.log10P	bicor.FHS	p.FHS	bicor.WHI	p.WHI	bicor.JHS	p.JHS	bicor.InChianti	p.InChianti	bicor.BLSA	p.BLSA	bicor.LBC21	p.LBC21	bicor.LBC36	p.LBC36	bicor.NAS	p.NAS
DNAmB2MAdjAge	1	Diet	log2(Total energy)	2	4221	-0.0233102	-1.51314	0.130245	0.885239			-0.0271283	0.110565									-0.00579201	0.873632
DNAmB2MAdjAge	2	Diet	Carbohydrate	2	4222	-0.0140524	-0.912173	0.361678	0.441678			-0.0177909	0.295462									0.00306058	0.932958
DNAmB2MAdjAge	3	Diet	Protein	2	4221	-0.0139986	-0.90848	0.363625	0.439346			-0.015366	0.366231									-0.00772824	0.831938
DNAmB2MAdjAge	4	Diet	Fat	2	4221	0.0344292	2.2357	0.0253713	1.59566			0.0374252	0.0276529									0.0206773	0.570102
DNAmB2MAdjAge	5	Diet	log2(1+Red meat)	3	4873	0.00160651	0.112066	0.910771	0.0405907	-0.0639163	0.102724	0.0142114	0.403274									0.000428063	0.990612
DNAmB2MAdjAge	6	Diet	log2(1+Poultry)	3	4832	-0.0137222	-0.953759	0.340206	0.468258	0.0650715	0.096258	-0.0328838	0.0529576									0.00712616	0.848977
DNAmB2MAdjAge	7	Diet	log2(1+Fish)	3	4873	-0.0309689	-2.16154	0.0306534	1.51352	-0.0639163	0.102724	-0.0319351	0.0602345									0.00178871	0.960731
DNAmB2MAdjAge	8	Diet	log2(1+Dairy)	3	4868	-0.0195278	-1.36196	0.17321	0.761427	0.0599764	0.127785	-0.0475443	0.00514096									0.0410178	0.259378
DNAmB2MAdjAge	9	Diet	log2(1+Whole grains)	2	4108	-0.0334542	-2.14269	0.0321382	1.49298	-0.0428097	0.277846	-0.0317166	0.0621073
DNAmB2MAdjAge	10	Diet	log2(1+Nuts)	1	3463	-0.0384224	-2.26039	0.0237969	1.62348			-0.0384224	0.0237969
DNAmB2MAdjAge	11	Diet	log2(Fruits)	3	4864	-0.0175493	-1.22313	0.221282	0.655054	0.0599711	0.129333	-0.0389976	0.0217425									0.0151402	0.677371
DNAmB2MAdjAge	12	Diet	log2(Vegetables)	3	4864	-0.0186518	-1.30011	0.193565	0.713174	0.0544156	0.16828	-0.0391183	0.0213532									0.0131329	0.718108
DNAmB2MAdjAge	14	Diet	log(OMEGA3)	1	643	0.0014642	0.0370131	0.970475	0.0130159	0.0014642	0.970475
DNAmB2MAdjAge	15	Diet	log(VitaminA)	1	651	-0.0339128	-0.863037	0.388117	0.411037	-0.0339128	0.388117
DNAmB2MAdjAge	16	Diet	log(VitaminC)	2	1409	-0.00692971	-0.259453	0.795286	0.0994766	0.00392133	0.920522											-0.0162423	0.655518
DNAmB2MAdjAge	17	Diet	log(VitaminB6)	2	1407	-0.0239671	-0.896819	0.369816	0.432015	-0.00441464	0.910714											-0.0406781	0.263705
DNAmB2MAdjAge	18	Diet	log(VitaminE)	2	1397	0.00329504	0.12284	0.902234	0.044681	0.0230856	0.560619											-0.0133733	0.71338
DNAmB2MAdjAge	19	Diet	log(Selenium)	2	1401	-0.0314358	-1.17428	0.240285	0.619274	-0.0372406	0.345815											-0.0265057	0.466564
DNAmB2MAdjAge	20	Diet	log(Iron)	1	633	-0.0139381	-0.349897	0.726416	0.138815	-0.0139381	0.726416
DNAmB2MAdjAge	21	Diet	log(Zinc)	2	1404	-0.0434448	-1.62581	0.10399	0.98301	-0.0793003	0.0438447											-0.0127411	0.726372
DNAmB2MAdjAge	22	Diet	log(Calcium)	2	1407	-0.00528954	-0.19804	0.843014	0.0741653	-0.000493144	0.989994											-0.00939854	0.796221
DNAmB2MAdjAge	23	Diet	log(FolicAcid)	2	1407	-0.0533903	-1.99997	0.0455036	1.34195	-0.055541	0.157471											-0.051546	0.156564
DNAmB2MAdjAge	24	Diet	log(VitaminD)	2	1397	0.000983802	0.036688	0.970734	0.0128999	0.0433156	0.274721											-0.0346754	0.34075
DNAmB2MAdjAge	25	Diet	log(Copper)	1	643	-0.000732498	-0.0185396	0.985208	0.00647191	-0.000732498	0.985208
DNAmB2MAdjAge	26	Diet	log(BrewYeast)	1	643	0.0111712	0.282681	0.777421	0.109343	0.0111712	0.777421
DNAmB2MAdjAge	27	Diet	log(BetaCaroteneSup)	1	645	0.0183196	0.463979	0.642663	0.192017	0.0183196	0.642663
DNAmB2MAdjAge	28	Diet	log(Magnesium)	1	641	0.0304457	0.768734	0.442051	0.354528	0.0304457	0.442051
DNAmB2MAdjAge	29	Dietary Biomarkers	Retinol	1	2053	-0.00547544	-0.248108	0.804051	0.0947166			-0.00547544	0.804051
DNAmB2MAdjAge	30	Dietary Biomarkers	Mean carotenoids	1	2052	-0.136328	-6.21038	5.28561e-10	9.2769			-0.136328	5.28561e-10
DNAmB2MAdjAge	31	Dietary Biomarkers	Lycopene	1	2053	-0.0603367	-2.73431	0.00625103	2.20405			-0.0603367	0.00625103
DNAmB2MAdjAge	32	Dietary Biomarkers	log2(alpha-Carotene)	1	2053	-0.114229	-5.19276	2.07198e-07	6.68362			-0.114229	2.07198e-07
DNAmB2MAdjAge	33	Dietary Biomarkers	log2(beta-Carotene)	1	2052	-0.0883246	-4.00654	6.16147e-05	4.21032			-0.0883246	6.16147e-05
DNAmB2MAdjAge	34	Dietary Biomarkers	log2(Lutein+Zeaxanthin)	1	2053	-0.112052	-5.09359	3.51345e-07	6.45427			-0.112052	3.51345e-07
DNAmB2MAdjAge	35	Dietary Biomarkers	log2(beta-Cryptoxanthin)	1	2053	-0.118018	-5.37075	7.84115e-08	7.10562			-0.118018	7.84115e-08
DNAmB2MAdjAge	36	Dietary Biomarkers	log2(alpha-Tocopherol)	1	2053	-0.0493642	-2.23557	0.02538	1.59551			-0.0493642	0.02538
DNAmB2MAdjAge	37	Dietary Biomarkers	log2(gamma-Tocopherol)	1	2053	0.0425106	1.92555	0.0541608	1.26631			0.0425106	0.0541608
DNAmB2MAdjAge	38	Measurements	log(A1C)	1	711	0.0451759	1.20204	0.229348	0.639504	0.0451759	0.229348
DNAmB2MAdjAge	39	Measurements	log2(C-reactive protein)	8	11281	0.13771	14.7079	5.73692e-49	48.2413	0.215623	6.15993e-09	0.142764	8.09557e-14	0.122574	2.74123e-07	0.122607	3.64268e-06	0.186191	1.36868e-07	0.259628	0.000579011	0.0969114	1.68162e-06	0.150444	3.88092e-08
DNAmB2MAdjAge	40	Measurements	log2(Insulin)	3	5912	0.0909086	7.00735	2.4287e-12	11.6146			0.113802	1.51811e-12			-0.0200182	0.595963							0.0832048	0.00203131
DNAmB2MAdjAge	41	Measurements	log2(Glucose)	5	7392	0.0329829	2.83447	0.00459022	2.33817	0.0704059	0.0609398	0.0433751	0.00653922			-0.00358516	0.892683	0.0825623	0.0278084					-0.0489244	0.223429
DNAmB2MAdjAge	42	Measurements	log2(Triglyceride)	6	9847	0.036633	3.63308	0.000280062	3.55275	0.0412289	0.272877	0.0452036	0.00458268	0.0669966	0.00686923	-0.0196645	0.459412	0.0573871	0.108439					0.0198768	0.462108
DNAmB2MAdjAge	43	Measurements	Total cholesterol	8	13002	-0.0722945	-8.25036	1.5792e-16	15.8016	-0.108132	0.0039192	-0.0662435	3.2038e-05	-0.061056	0.0137748	-0.0897462	0.00071435	-0.0371023	0.299796	-0.175308	0.000273788	-0.0466296	0.0148333	-0.104891	9.92494e-05
DNAmB2MAdjAge	44	Measurements	LDL cholesterol	4	7688	-0.0536165	-4.70142	2.58353e-06	5.58779			-0.0553057	0.000572959	-0.0526341	0.0345213	-0.0819551	0.00202207	0.0043711	0.902899
DNAmB2MAdjAge	45	Measurements	HDL cholesterol	6	9844	-0.0952516	-9.46824	2.84611e-21	20.5457	-0.157959	2.33592e-05	-0.089951	1.60374e-08	-0.0847743	0.000615472	-0.0699638	0.00838422	-0.0960285	0.00712922					-0.115763	1.73198e-05
DNAmB2MAdjAge	46	Measurements	log2(Creatinine)	3	4770	0.0351129	2.42333	0.0153789	1.81307	0.0122221	0.74567	0.0448708	0.0210643			0.0282836	0.287225
DNAmB2MAdjAge	47	Measurements	log2(IL6)	3	3185	0.0771377	4.35872	1.30823e-05	4.88332							0.038096	0.151332	0.118464	0.000871314					0.10024	0.00167839
DNAmB2MAdjAge	48	Measurements	log2(TNFA)	3	2621	0.141965	7.30704	2.73094e-13	12.5637							0.178623	1.51514e-11	0.00154	0.981212					0.12229	0.00012315
DNAmB2MAdjAge	49	Measurements	log2(Urine Creatinine)	3	1793	-0.0102599	-0.433303	0.664794	0.177313	-0.0107278	0.77712			0.00547601	0.913998	-0.0185571	0.623845
DNAmB2MAdjAge	50	Measurements	FEV1	5	5836	-0.0925466	-7.08032	1.43821e-12	11.8422	-0.123337	0.0026646							-0.0646972	0.116482	-0.0540167	0.157295	-0.0894061	2.37743e-06	-0.120271	3.16277e-05
DNAmB2MAdjAge	52	Measurements	Systolic blood pressure	6	11980	0.0258587	2.82931	0.00466478	2.33117	0.0526897	0.160824	0.0526369	0.00092441	0.0486404	0.0424151	-0.00255485	0.92377					-0.00782201	0.679317	0.00332028	0.90235
DNAmB2MAdjAge	53	Measurements	Diastolic blood pressure	6	11980	-0.007259	-0.794028	0.427179	0.36939	0.0211226	0.574521	0.000558571	0.971981	0.023807	0.32061	0.0174084	0.514435					-0.0456043	0.0159151	-0.0310101	0.251721
DNAmB2MAdjAge	54	Measurements	log2(Waist / hip ratio)	3	5887	0.0920656	7.07852	1.45699e-12	11.8365	0.10837	0.0040428	0.0963275	2.44217e-09											0.071801	0.00784633
DNAmB2MAdjAge	55	Measurements	BMI	8	13420	0.0695824	8.06983	7.03972e-16	15.1524	0.130451	0.000492542	0.0880466	3.2043e-08	0.099651	3.01906e-05	-0.0400188	0.13454	0.125399	0.000428491	0.0431279	0.259661	0.0550997	0.00358739	0.0686957	0.0108921
DNAmB2MAdjAge	56	Measurements	MMSE	6	7017	-0.0506511	-4.24138	2.2215e-05	4.65335	-0.039557	0.292816	-0.0325841	0.3482			-0.0840191	0.00150597	-0.0995428	0.0180285	-0.112788	0.00300995	-0.0165008	0.383201
DNAmB2MAdjAge	57	Measurements	Telomere length	3	2193	-0.0969471	-4.55371	5.27088e-06	5.27812	-0.135195	0.0346843	-0.179651	2.13597e-07											-0.0275838	0.354242
DNAmB2MAdjAge	58	Life style	Education	8	13312	-0.0430278	-4.96274	6.95072e-07	6.15797	-0.0311722	0.451425	-0.0600725	0.000165812	-0.0337741	0.158708	-0.0775385	0.00347147	-0.0870181	0.0150326	-0.0639223	0.0936107	-0.0184185	0.330377	0.010436	0.699861
DNAmB2MAdjAge	59	Life style	Income	3	6687	-0.0599674	-4.90745	9.22666e-07	6.03496			-0.050259	0.00184354	-0.113277	1.04102e-05									-0.0275964	0.31204
DNAmB2MAdjAge	60	Life style	Hand grip	5	5962	-0.059158	-4.56884	4.90427e-06	5.30943	-0.0443291	0.305793					-0.0155336	0.574933	-0.0367665	0.330738	-0.0699081	0.080174	-0.0854707	6.07543e-06
DNAmB2MAdjAge	61	Life style	log2(1+Exercise)	4	7278	-0.0626942	-5.35425	8.59122e-08	7.06595			-0.0386957	0.018459	-0.0831921	0.000499791			-0.113485	0.00263248					-0.078077	0.00864708
DNAmB2MAdjAge	62	Life style	Current smoker	6	10247	0.0378052	3.82429	0.000131151	3.88223	0.0675038	0.0722308	0.0341102	0.0331097					0.046593	0.194438	0.0472832	0.214879	0.0327671	0.0833262	0.0334763	0.216281
DNAmB2MAdjAge	63	Life style	log2(1+Alcohol)	5	8050	-0.0236566	-2.12202	0.0338362	1.47062	0.0534786	0.154849	-0.0653373	0.000118598	-0.000279639	0.99084	0.0221084	0.403669					-0.0430107	0.236953
