# Supplementary material for: DNA methylation GrimAge version 2
Source: Aging (Albany NY). 2022 Dec 14;14(23):9484–549. doi: 10.18632/aging.204434 (PMC9792204; doi:10.18632/aging.204434)
Supplement: Supplementary Table 2.6 [file aging-14-204434-s008.xlsx]

## Sheet: Table S2.6
Supplementary Table 2.6. DNAmCystatinCAdjAge:Diet, clinically relevant measurements, and life style factors.
AgeAccel	order	category	var	NumData	n	Meta.bicor	Meta.bicor.Z	Meta.P	Meta.log10P	bicor.FHS	p.FHS	bicor.WHI	p.WHI	bicor.JHS	p.JHS	bicor.InChianti	p.InChianti	bicor.BLSA	p.BLSA	bicor.LBC21	p.LBC21	bicor.LBC36	p.LBC36	bicor.NAS	p.NAS
DNAmCystatinCAdjAge	1	Diet	log2(Total energy)	2	4221	-0.0129526	-0.840802	0.400459	0.397442			-0.0210757	0.215122									0.0242984	0.504533
DNAmCystatinCAdjAge	2	Diet	Carbohydrate	2	4222	-0.00908874	-0.589994	0.555195	0.255555			-0.0153283	0.367336									0.0194882	0.592269
DNAmCystatinCAdjAge	3	Diet	Protein	2	4221	-0.00573377	-0.372149	0.709782	0.148875			-0.0100309	0.55526									0.0139693	0.701239
DNAmCystatinCAdjAge	4	Diet	Fat	2	4221	0.029794	1.9341	0.0531007	1.2749			0.0343671	0.0432281									0.00881451	0.808727
DNAmCystatinCAdjAge	5	Diet	log2(1+Red meat)	3	4873	0.0124783	0.870689	0.383924	0.415755	-0.0791537	0.0435423	0.0323956	0.0566182									7.52398e-05	0.998349
DNAmCystatinCAdjAge	6	Diet	log2(1+Poultry)	3	4832	-0.0287301	-1.99617	0.0459152	1.33804	0.00421413	0.914636	-0.0358784	0.0346643									-0.0238865	0.52316
DNAmCystatinCAdjAge	7	Diet	log2(1+Fish)	3	4873	-0.0307276	-2.14363	0.0320626	1.494	-0.0791537	0.0435423	-0.0307924	0.0700932									0.0112054	0.757959
DNAmCystatinCAdjAge	8	Diet	log2(1+Dairy)	3	4868	-0.015071	-1.05053	0.293476	0.532428	0.0297706	0.450369	-0.0326647	0.0546641									0.0273619	0.452002
DNAmCystatinCAdjAge	9	Diet	log2(1+Whole grains)	2	4108	-0.0255222	-1.63466	0.102121	0.990884	0.00697099	0.859829	-0.0315479	0.0634778
DNAmCystatinCAdjAge	10	Diet	log2(1+Nuts)	1	3463	-0.0213985	-1.25835	0.208267	0.68138			-0.0213985	0.208267
DNAmCystatinCAdjAge	11	Diet	log2(Fruits)	3	4864	-0.0115511	-0.804891	0.420882	0.375839	-0.0110926	0.779271	-0.0200607	0.237891									0.0270549	0.457117
DNAmCystatinCAdjAge	12	Diet	log2(Vegetables)	3	4864	-0.0366232	-2.55234	0.0107002	1.97061	0.0166627	0.673759	-0.0510326	0.00267149									-0.0155926	0.668247
DNAmCystatinCAdjAge	14	Diet	log(OMEGA3)	1	643	-0.011397	-0.288735	0.772784	0.111942	-0.011397	0.772784
DNAmCystatinCAdjAge	15	Diet	log(VitaminA)	1	651	-0.000400958	-0.0102028	0.99186	0.00354984	-0.000400958	0.99186
DNAmCystatinCAdjAge	16	Diet	log(VitaminC)	2	1409	-0.0155496	-0.582289	0.560372	0.251524	-0.0210569	0.592105											-0.010826	0.766129
DNAmCystatinCAdjAge	17	Diet	log(VitaminB6)	2	1407	0.039506	1.47879	0.139197	0.85637	0.0655749	0.0953344											0.0171446	0.637756
DNAmCystatinCAdjAge	18	Diet	log(VitaminE)	2	1397	0.00351433	0.13102	0.895759	0.0478087	0.0113505	0.774717											-0.00309284	0.932315
DNAmCystatinCAdjAge	19	Diet	log(Selenium)	2	1401	-0.0123588	-0.461699	0.644297	0.190914	-0.0267161	0.498589											-0.000142082	0.996887
DNAmCystatinCAdjAge	20	Diet	log(Iron)	1	633	-0.00664273	-0.166603	0.867682	0.0616392	-0.00664273	0.867682
DNAmCystatinCAdjAge	21	Diet	log(Zinc)	2	1404	-0.00783293	-0.29279	0.769682	0.113688	-0.0358028	0.364103											0.0159839	0.660598
DNAmCystatinCAdjAge	22	Diet	log(Calcium)	2	1407	0.0124542	0.465935	0.641262	0.192965	0.00736153	0.851655											0.016811	0.644287
DNAmCystatinCAdjAge	23	Diet	log(FolicAcid)	2	1407	0.00303414	0.113494	0.909639	0.041131	0.00613388	0.876203											0.000382929	0.99161
DNAmCystatinCAdjAge	24	Diet	log(VitaminD)	2	1397	0.000100962	0.00376414	0.996997	0.0013063	0.00431333	0.913383											-0.00345146	0.924491
DNAmCystatinCAdjAge	25	Diet	log(Copper)	1	643	-0.00936717	-0.236869	0.812758	0.0900386	-0.00936717	0.812758
DNAmCystatinCAdjAge	26	Diet	log(BrewYeast)	1	643	0.0198333	0.501904	0.615735	0.210606	0.0198333	0.615735
DNAmCystatinCAdjAge	27	Diet	log(BetaCaroteneSup)	1	645	0.0623737	1.58131	0.113808	0.943829	0.0623737	0.113808
DNAmCystatinCAdjAge	28	Diet	log(Magnesium)	1	641	0.0412302	1.04121	0.29778	0.526105	0.0412302	0.29778
DNAmCystatinCAdjAge	29	Dietary Biomarkers	Retinol	1	2053	-0.00546607	-0.247468	0.804546	0.0944491			-0.00546607	0.804546
DNAmCystatinCAdjAge	30	Dietary Biomarkers	Mean carotenoids	1	2052	-0.14714	-6.70819	1.97055e-11	10.7054			-0.14714	1.97055e-11
DNAmCystatinCAdjAge	31	Dietary Biomarkers	Lycopene	1	2053	-0.0571384	-2.58851	0.00963917	2.01596			-0.0571384	0.00963917
DNAmCystatinCAdjAge	32	Dietary Biomarkers	log2(alpha-Carotene)	1	2053	-0.131479	-5.98457	2.16958e-09	8.66362			-0.131479	2.16958e-09
DNAmCystatinCAdjAge	33	Dietary Biomarkers	log2(beta-Carotene)	1	2052	-0.127455	-5.79896	6.67279e-09	8.17569			-0.127455	6.67279e-09
DNAmCystatinCAdjAge	34	Dietary Biomarkers	log2(Lutein+Zeaxanthin)	1	2053	-0.107971	-4.90748	9.22552e-07	6.03501			-0.107971	9.22552e-07
DNAmCystatinCAdjAge	35	Dietary Biomarkers	log2(beta-Cryptoxanthin)	1	2053	-0.119799	-5.45513	4.89369e-08	7.31036			-0.119799	4.89369e-08
DNAmCystatinCAdjAge	36	Dietary Biomarkers	log2(alpha-Tocopherol)	1	2053	-0.0593413	-2.68885	0.00716977	2.14449			-0.0593413	0.00716977
DNAmCystatinCAdjAge	37	Dietary Biomarkers	log2(gamma-Tocopherol)	1	2053	0.11419	5.18904	2.11386e-07	6.67492			0.11419	2.11386e-07
DNAmCystatinCAdjAge	38	Measurements	log(A1C)	1	711	0.0873297	2.32801	0.0199113	1.7009	0.0873297	0.0199113
DNAmCystatinCAdjAge	39	Measurements	log2(C-reactive protein)	8	11281	0.171081	18.3336	4.46231e-75	74.3504	0.240899	6.94388e-11	0.173974	6.84643e-20	0.189639	1.14774e-15	0.127744	1.35928e-06	0.167538	2.26254e-06	0.183251	0.0162003	0.166298	1.36473e-16	0.157878	7.87308e-09
DNAmCystatinCAdjAge	40	Measurements	log2(Insulin)	3	5912	0.0910711	7.01904	2.23403e-12	11.6509			0.113726	1.56101e-12			0.0211515	0.575234							0.0630964	0.0193782
DNAmCystatinCAdjAge	41	Measurements	log2(Glucose)	5	7392	0.0608849	5.23818	1.62168e-07	6.79004	0.116965	0.00179088	0.0860673	6.50948e-08			0.0155947	0.55703	0.0416268	0.267799					-0.0381929	0.342016
DNAmCystatinCAdjAge	42	Measurements	log2(Triglyceride)	6	9847	0.0575788	5.71827	1.07614e-08	7.96813	0.0824373	0.0277496	0.0978479	7.65806e-10	-0.000510198	0.9836	-0.0268615	0.312064	0.0677606	0.057946					0.078692	0.00355013
DNAmCystatinCAdjAge	43	Measurements	Total cholesterol	8	13002	-0.0613301	-6.99815	2.59365e-12	11.5861	-0.10595	0.00471558	-0.00984333	0.537317	-0.063876	0.00995732	-0.0409554	0.123314	-0.0343767	0.336921	-0.161648	0.000811956	-0.124795	5.74809e-11	-0.0601009	0.026004
DNAmCystatinCAdjAge	44	Measurements	LDL cholesterol	4	7688	-0.0218606	-1.91487	0.0555097	1.25563			-0.00827153	0.606967	-0.0560566	0.0243301	-0.0222495	0.40294	-0.0177805	0.619868
DNAmCystatinCAdjAge	45	Measurements	HDL cholesterol	6	9844	-0.0817635	-8.12633	4.42477e-16	15.3541	-0.197696	1.03786e-07	-0.0985785	5.79897e-10	-0.0073104	0.768289	-0.0435322	0.101302	-0.0713409	0.0458544					-0.105601	8.94819e-05
DNAmCystatinCAdjAge	46	Measurements	log2(Creatinine)	3	4770	0.0742426	5.13081	2.88502e-07	6.53985	0.109006	0.00364556	0.0649855	0.000832274			0.0740676	0.00525008
DNAmCystatinCAdjAge	47	Measurements	log2(IL6)	3	3185	0.079132	4.47049	7.80397e-06	5.10768							0.0894088	0.000735415	0.113478	0.00145598					0.0365523	0.252959
DNAmCystatinCAdjAge	48	Measurements	log2(TNFA)	3	2621	0.0649105	3.3214	0.000895658	3.04786							0.100955	0.00015361	0.0293249	0.654288					0.0216433	0.49834
DNAmCystatinCAdjAge	49	Measurements	log2(Urine Creatinine)	3	1793	0.0411495	1.73817	0.0821811	1.08523	0.0281812	0.456977			0.0691253	0.173081	0.0385291	0.30832
DNAmCystatinCAdjAge	50	Measurements	FEV1	5	5836	-0.112018	-8.5849	9.09166e-18	17.0414	-0.138681	0.000718624							-0.0592584	0.15054	-0.045113	0.237538	-0.108236	1.07206e-08	-0.171071	2.82497e-09
DNAmCystatinCAdjAge	52	Measurements	Systolic blood pressure	6	11980	0.0366639	4.01411	5.96717e-05	4.22423	0.0808412	0.0312224	0.0775011	1.03753e-06	0.0189878	0.428542	-0.0151038	0.571221					-0.0105957	0.575664	0.0671715	0.0129561
DNAmCystatinCAdjAge	53	Measurements	Diastolic blood pressure	6	11980	0.00622155	0.680788	0.496006	0.304513	0.0168735	0.653864	0.0353312	0.0262258	-0.0500005	0.0368988	0.00305779	0.908754					-0.027985	0.139152	0.0611167	0.0237879
DNAmCystatinCAdjAge	54	Measurements	log2(Waist / hip ratio)	3	5887	0.0925342	7.12344	1.05265e-12	11.9777	0.222271	2.3023e-09	0.10146	3.30773e-10											-0.00102007	0.96991
DNAmCystatinCAdjAge	55	Measurements	BMI	8	13420	0.0980962	11.4008	4.1436e-30	29.3826	0.219181	3.29472e-09	0.117318	1.50233e-13	0.100032	2.79277e-05	0.0353452	0.185968	0.0494968	0.166252	0.0630609	0.0986143	0.115564	8.52572e-10	0.0492067	0.0683415
DNAmCystatinCAdjAge	56	Measurements	MMSE	6	7017	-0.042799	-3.58287	0.00033984	3.46873	-0.0868563	0.020685	0.0150046	0.665597			-0.0466892	0.0780521	-0.0649413	0.123385	-0.0838667	0.0276787	-0.0321931	0.0889177
DNAmCystatinCAdjAge	57	Measurements	Telomere length	3	2193	-0.079301	-3.71697	0.000201626	3.69545	-0.0876881	0.172004	-0.139951	5.79341e-05											-0.0331442	0.265609
DNAmCystatinCAdjAge	58	Life style	Education	8	13312	-0.0573495	-6.62142	3.55769e-11	10.4488	-0.035427	0.392122	-0.081975	2.6844e-07	-0.0799724	0.000826247	-0.00691874	0.794508	-0.0092269	0.796737	-0.00524026	0.890819	-0.0552546	0.00341576	-0.0769555	0.00441483
DNAmCystatinCAdjAge	59	Life style	Income	3	6687	-0.0759675	-6.22062	4.95182e-10	9.30524			-0.0777129	1.42397e-06	-0.107088	3.11548e-05									-0.0359194	0.188165
DNAmCystatinCAdjAge	60	Life style	Hand grip	5	5962	-0.0490928	-3.79395	0.000148268	3.82895	-0.0344611	0.426055					0.00373234	0.892433	-0.0413188	0.27458	-0.0671783	0.0925599	-0.0745368	8.00737e-05
DNAmCystatinCAdjAge	61	Life style	log2(1+Exercise)	4	7278	-0.0704053	-6.0137	1.81341e-09	8.7415			-0.0606278	0.000217899	-0.0880449	0.000229319			-0.0501389	0.187218					-0.0876009	0.00320712
DNAmCystatinCAdjAge	62	Life style	Current smoker	6	10247	0.0388935	3.93476	8.32794e-05	4.07946	0.0607107	0.105895	0.0447104	0.00521907					-0.0226821	0.527999	0.0283008	0.458066	0.0485829	0.0101978	0.0313276	0.247242
DNAmCystatinCAdjAge	63	Life style	log2(1+Alcohol)	5	8050	-0.0254691	-2.28478	0.0223257	1.6512	-0.00309435	0.934463	-0.0665143	8.84819e-05	0.0254226	0.296331	-0.0127913	0.629054					0.00478825	0.895394
