# Supplementary material for: DNA methylation GrimAge version 2
Source: Aging (Albany NY). 2022 Dec 14;14(23):9484–549. doi: 10.18632/aging.204434 (PMC9792204; doi:10.18632/aging.204434)
Supplement: Supplementary Table 2.7 [file aging-14-204434-s009.xlsx]

## Sheet: Table S2.7
Supplementary Table 2.7. DNAmGDF15AdjAge:Diet, clinically relevant measurements, and life style factors.
AgeAccel	order	category	var	NumData	n	Meta.bicor	Meta.bicor.Z	Meta.P	Meta.log10P	bicor.FHS	p.FHS	bicor.WHI	p.WHI	bicor.JHS	p.JHS	bicor.InChianti	p.InChianti	bicor.BLSA	p.BLSA	bicor.LBC21	p.LBC21	bicor.LBC36	p.LBC36	bicor.NAS	p.NAS
DNAmGDF15AdjAge	1	Diet	log2(Total energy)	2	4221	-0.00785939	-0.510169	0.609933	0.214718			0.00155382	0.927203									-0.0509014	0.161609
DNAmGDF15AdjAge	2	Diet	Carbohydrate	2	4222	-0.0454158	-2.95013	0.00317637	2.49807			-0.043743	0.0100575									-0.0530626	0.144198
DNAmGDF15AdjAge	3	Diet	Protein	2	4221	-0.0187355	-1.2168	0.223682	0.65037			-0.00902416	0.59546									-0.0631798	0.0822822
DNAmGDF15AdjAge	4	Diet	Fat	2	4221	0.0310485	2.01595	0.0438055	1.35847			0.0425659	0.0122684									-0.0218038	0.549282
DNAmGDF15AdjAge	5	Diet	log2(1+Red meat)	3	4873	0.0121053	0.844282	0.398512	0.399559	-0.0714545	0.068602	0.0277918	0.102109									0.0121046	0.739422
DNAmGDF15AdjAge	6	Diet	log2(1+Poultry)	3	4832	0.0193366	1.34291	0.179301	0.746417	0.0523256	0.182776	0.021569	0.204491									-0.0214229	0.566966
DNAmGDF15AdjAge	7	Diet	log2(1+Fish)	3	4873	-0.0217461	-1.51654	0.129382	0.888127	-0.0714545	0.068602	-0.0244941	0.149739									0.0335605	0.356263
DNAmGDF15AdjAge	8	Diet	log2(1+Dairy)	3	4868	-0.0381575	-2.6602	0.00780948	2.10738	-0.00137898	0.972127	-0.036446	0.0320393									-0.0771211	0.0337292
DNAmGDF15AdjAge	9	Diet	log2(1+Whole grains)	2	4108	-0.0180787	-1.1584	0.246702	0.607827	-0.0212596	0.590342	-0.01749	0.30327
DNAmGDF15AdjAge	10	Diet	log2(1+Nuts)	1	3463	-0.0177891	-1.04609	0.295518	0.529417			-0.0177891	0.295518
DNAmGDF15AdjAge	11	Diet	log2(Fruits)	3	4864	-0.027585	-1.92348	0.0544193	1.26425	-0.0253856	0.521109	-0.0266969	0.115932									-0.0335188	0.356809
DNAmGDF15AdjAge	12	Diet	log2(Vegetables)	3	4864	-0.0404381	-2.81812	0.0048305	2.31601	0.00807044	0.838465	-0.0454466	0.0074957									-0.058426	0.108004
DNAmGDF15AdjAge	14	Diet	log(OMEGA3)	1	643	-0.0040487	-0.102356	0.918474	0.036933	-0.0040487	0.918474
DNAmGDF15AdjAge	15	Diet	log(VitaminA)	1	651	0.00224058	0.0569967	0.954548	0.0202023	0.00224058	0.954548
DNAmGDF15AdjAge	16	Diet	log(VitaminC)	2	1409	-0.0138118	-0.517739	0.60464	0.218503	0.0512466	0.192006											-0.0695136	0.0558009
DNAmGDF15AdjAge	17	Diet	log(VitaminB6)	2	1407	-0.0442527	-1.65781	0.0973554	1.01164	-0.0197664	0.615613											-0.0650879	0.0730887
DNAmGDF15AdjAge	18	Diet	log(VitaminE)	2	1397	-0.0313845	-1.17185	0.241256	0.617521	0.0172278	0.664114											-0.0720846	0.0470647
DNAmGDF15AdjAge	19	Diet	log(Selenium)	2	1401	-0.0634736	-2.37541	0.0175294	1.75623	-0.0735321	0.0621022											-0.0549192	0.13082
DNAmGDF15AdjAge	20	Diet	log(Iron)	1	633	-0.0415025	-1.0416	0.297596	0.526373	-0.0415025	0.297596
DNAmGDF15AdjAge	21	Diet	log(Zinc)	2	1404	-0.057013	-2.13459	0.0327942	1.4842	-0.0154682	0.69495											-0.0921897	0.0110871
DNAmGDF15AdjAge	22	Diet	log(Calcium)	2	1407	-0.0986216	-3.70153	0.000214302	3.66897	-0.105479	0.00716472											-0.0927473	0.0106256
DNAmGDF15AdjAge	23	Diet	log(FolicAcid)	2	1407	-0.0694473	-2.60716	0.00912974	2.03954	-0.00472348	0.90447											-0.124156	0.000600832
DNAmGDF15AdjAge	24	Diet	log(VitaminD)	2	1397	-0.0203408	-0.75902	0.44784	0.348877	-0.0520018	0.189259											0.00638012	0.860826
DNAmGDF15AdjAge	25	Diet	log(Copper)	1	643	-0.0400488	-1.01308	0.311021	0.50721	-0.0400488	0.311021
DNAmGDF15AdjAge	26	Diet	log(BrewYeast)	1	643	0.00198465	0.0501692	0.959988	0.0177344	0.00198465	0.959988
DNAmGDF15AdjAge	27	Diet	log(BetaCaroteneSup)	1	645	0.00994748	0.252099	0.800964	0.0963868	0.00994748	0.800964
DNAmGDF15AdjAge	28	Diet	log(Magnesium)	1	641	0.00458328	0.115682	0.907904	0.04196	0.00458328	0.907904
DNAmGDF15AdjAge	29	Dietary Biomarkers	Retinol	1	2053	0.00762261	0.345186	0.729955	0.136704			0.00762261	0.729955
DNAmGDF15AdjAge	30	Dietary Biomarkers	Mean carotenoids	1	2052	-0.096312	-4.37246	1.22856e-05	4.9106			-0.096312	1.22856e-05
DNAmGDF15AdjAge	31	Dietary Biomarkers	Lycopene	1	2053	-0.0260365	-1.17856	0.238573	0.622378			-0.0260365	0.238573
DNAmGDF15AdjAge	32	Dietary Biomarkers	log2(alpha-Carotene)	1	2053	-0.0864972	-3.92614	8.63196e-05	4.06389			-0.0864972	8.63196e-05
DNAmGDF15AdjAge	33	Dietary Biomarkers	log2(beta-Carotene)	1	2052	-0.0692376	-3.13772	0.00170265	2.76887			-0.0692376	0.00170265
DNAmGDF15AdjAge	34	Dietary Biomarkers	log2(Lutein+Zeaxanthin)	1	2053	-0.0683863	-3.10129	0.00192683	2.71516			-0.0683863	0.00192683
DNAmGDF15AdjAge	35	Dietary Biomarkers	log2(beta-Cryptoxanthin)	1	2053	-0.0951238	-4.3183	1.57233e-05	4.80346			-0.0951238	1.57233e-05
DNAmGDF15AdjAge	36	Dietary Biomarkers	log2(alpha-Tocopherol)	1	2053	-0.0391376	-1.77172	0.0764405	1.11668			-0.0391376	0.0764405
DNAmGDF15AdjAge	37	Dietary Biomarkers	log2(gamma-Tocopherol)	1	2053	0.0485947	2.2012	0.0277222	1.55717			0.0485947	0.0277222
DNAmGDF15AdjAge	38	Measurements	log(A1C)	1	711	0.111922	2.99194	0.0027721	2.55719	0.111922	0.0027721
DNAmGDF15AdjAge	39	Measurements	log2(C-reactive protein)	8	11281	0.140754	15.0437	3.79997e-51	50.4202	0.228364	6.79016e-10	0.0903716	2.52449e-06	0.106312	8.32448e-06	0.152429	7.4921e-09	0.136051	0.000127204	0.062432	0.420132	0.174007	4.67625e-18	0.178423	6.41661e-11
DNAmGDF15AdjAge	40	Measurements	log2(Insulin)	3	5912	0.0484368	3.72491	0.000195386	3.70911			0.052175	0.00122436			0.0249346	0.509213							0.0499767	0.0641254
DNAmGDF15AdjAge	41	Measurements	log2(Glucose)	5	7392	0.018398	1.58202	0.113645	0.94445	0.129444	0.000539762	0.0280589	0.0786869			-0.0321697	0.225869	0.0805597	0.0318694					-0.125056	0.001794
DNAmGDF15AdjAge	42	Measurements	log2(Triglyceride)	6	9847	0.0411939	4.0883	4.34538e-05	4.36197	0.133755	0.000345617	0.0502963	0.00160389	-0.00460611	0.852782	-0.00184732	0.944598	0.0982894	0.00572253					0.0324676	0.229597
DNAmGDF15AdjAge	43	Measurements	Total cholesterol	8	13002	-0.0433397	-4.94198	7.73328e-07	6.11164	-0.0778398	0.0380177	0.00161433	0.919409	-0.0475699	0.0550849	-0.0202797	0.44565	-0.106972	0.00268564	-0.174457	0.000298239	-0.0576703	0.00257355	-0.0667756	0.0133644
DNAmGDF15AdjAge	44	Measurements	LDL cholesterol	4	7688	-0.0238704	-2.09211	0.0364287	1.43856			0.00470886	0.769605	-0.0644844	0.00954959	-0.0142311	0.59276	-0.0985045	0.00578614
DNAmGDF15AdjAge	45	Measurements	HDL cholesterol	6	9844	-0.0391731	-3.88637	0.000101755	3.99245	-0.142905	0.000133108	-0.0431804	0.00679725	0.0358508	0.148353	-0.037518	0.157892	-0.0920674	0.0098174					-0.033911	0.209537
DNAmGDF15AdjAge	46	Measurements	log2(Creatinine)	3	4770	0.0429309	2.9638	0.00303868	2.51732	-0.00085597	0.98185	0.0407754	0.0361594			0.0687271	0.00961329
DNAmGDF15AdjAge	47	Measurements	log2(IL6)	3	3185	0.0767182	4.33394	1.46463e-05	4.83427							0.0653337	0.0135832	0.0892013	0.0126338					0.0833224	0.00906443
DNAmGDF15AdjAge	48	Measurements	log2(TNFA)	3	2621	0.11982	6.15218	7.64228e-10	9.11678							0.161414	1.17089e-09	0.0344105	0.599875					0.0799018	0.0123003
DNAmGDF15AdjAge	49	Measurements	log2(Urine Creatinine)	3	1793	-0.0149232	-0.630201	0.528563	0.276903	-0.0297463	0.432434			-0.065072	0.199716	0.0277395	0.46348
DNAmGDF15AdjAge	50	Measurements	FEV1	5	5836	-0.135874	-10.4433	1.57231e-25	24.8035	-0.207678	3.2902e-07							-0.0347403	0.398679	-0.0864895	0.023104	-0.162443	6.06384e-18	-0.11532	6.63692e-05
DNAmGDF15AdjAge	52	Measurements	Systolic blood pressure	6	11980	-0.000430392	-0.0470723	0.962456	0.0166193	0.0328777	0.381827	-0.00787413	0.620538	0.00208743	0.930652	0.0184064	0.490351					-0.0281523	0.136902	0.0379073	0.161131
DNAmGDF15AdjAge	53	Measurements	Diastolic blood pressure	6	11980	-0.0395458	-4.32736	1.50904e-05	4.8213	-0.0351278	0.350178	-0.0519564	0.0010751	-0.0205666	0.391121	-0.00968508	0.716757					-0.0543566	0.00404531	-0.0303572	0.261846
DNAmGDF15AdjAge	54	Measurements	log2(Waist / hip ratio)	3	5887	0.0810141	6.2281	4.72123e-10	9.32594	0.183847	8.95951e-07	0.0846003	1.65889e-07											0.0173065	0.522148
DNAmGDF15AdjAge	55	Measurements	BMI	8	13420	0.030133	3.49063	0.000481878	3.31706	0.156374	2.83456e-05	0.0265287	0.0964204	-0.0270623	0.25857	0.019104	0.475162	0.108398	0.00231565	-0.0323146	0.398392	0.0360904	0.05659	0.0323023	0.231638
DNAmGDF15AdjAge	56	Measurements	MMSE	6	7017	-0.0531395	-4.45017	8.58033e-06	5.0665	-0.0678005	0.071188	-0.0538707	0.120739			-0.0642351	0.0152327	-0.0492171	0.241316	-0.0905172	0.01744	-0.0350902	0.0637408
DNAmGDF15AdjAge	57	Measurements	Telomere length	3	2193	-0.135517	-6.37694	1.80663e-10	9.74313	-0.136335	0.0331421	-0.195211	1.66436e-08											-0.0913539	0.00211255
DNAmGDF15AdjAge	58	Life style	Education	8	13312	-0.0516315	-5.95645	2.57771e-09	8.58877	-0.0651295	0.115268	-0.0735412	3.94521e-06	-0.0464536	0.0524766	-0.0110804	0.676822	-0.0898598	0.0120435	-0.0406904	0.28627	-0.0388795	0.0398058	-0.0410756	0.12903
DNAmGDF15AdjAge	59	Life style	Income	3	6687	-0.0653443	-5.34918	8.83552e-08	7.05377			-0.0545103	0.000728018	-0.116343	5.90757e-06									-0.0387835	0.155306
DNAmGDF15AdjAge	60	Life style	Hand grip	5	5962	-0.0576981	-4.45755	8.29033e-06	5.08143	-0.044333	0.305722					-0.00505993	0.854886	-0.0781039	0.0379961	-0.114392	0.00408497	-0.0669281	0.000405084
DNAmGDF15AdjAge	61	Life style	log2(1+Exercise)	4	7278	-0.0669948	-5.72136	1.05676e-08	7.97602			-0.0417014	0.0110578	-0.0791987	0.000924229			-0.140213	0.000212731					-0.0859359	0.00384108
DNAmGDF15AdjAge	62	Life style	Current smoker	6	10247	0.181518	18.5652	6.14317e-77	76.2116	0.236907	1.33913e-10	0.177221	4.90642e-29					0.0788029	0.0280647	0.174772	3.66441e-06	0.198525	2.15868e-26	0.190221	1.35243e-12
DNAmGDF15AdjAge	63	Life style	log2(1+Alcohol)	5	8050	0.00404073	0.362338	0.7171	0.144421	0.0488162	0.194221	-0.0241787	0.154888	0.0310316	0.202062	0.0374015	0.157633					-0.0320161	0.378966
