# Supplementary material for: DNA methylation GrimAge version 2
Source: Aging (Albany NY). 2022 Dec 14;14(23):9484–549. doi: 10.18632/aging.204434 (PMC9792204; doi:10.18632/aging.204434)
Supplement: Supplementary Table 2.8 [file aging-14-204434-s010.xlsx]

## Sheet: Table S2.8
Supplementary Table 2.8. DNAmLeptinAdjAge:Diet, clinically relevant measurements, and life style factors.
AgeAccel	order	category	var	NumData	n	Meta.bicor	Meta.bicor.Z	Meta.P	Meta.log10P	bicor.FHS	p.FHS	bicor.WHI	p.WHI	bicor.JHS	p.JHS	bicor.InChianti	p.InChianti	bicor.BLSA	p.BLSA	bicor.LBC21	p.LBC21	bicor.LBC36	p.LBC36	bicor.NAS	p.NAS
DNAmLeptinAdjAge	1	Diet	log2(Total energy)	2	4221	-0.0124881	-0.810601	0.417595	0.379245			-0.00563245	0.740479									-0.0438811	0.227863
DNAmLeptinAdjAge	2	Diet	Carbohydrate	2	4222	-0.0706692	-4.59574	4.31224e-06	5.3653			-0.0832555	9.25534e-07									-0.0128025	0.724915
DNAmLeptinAdjAge	3	Diet	Protein	2	4221	0.0236308	1.53463	0.124874	0.903528			0.0328725	0.053049									-0.0188045	0.605552
DNAmLeptinAdjAge	4	Diet	Fat	2	4221	0.0589005	3.82865	0.000128847	3.88993			0.0765125	6.55394e-06									-0.0221334	0.543247
DNAmLeptinAdjAge	5	Diet	log2(1+Red meat)	3	4873	0.0439838	3.06939	0.00214493	2.66859	-0.0443272	0.259191	0.0618818	0.000269195									0.0376044	0.301235
DNAmLeptinAdjAge	6	Diet	log2(1+Poultry)	3	4832	0.0124715	0.865801	0.386599	0.412739	0.0538445	0.170397	0.00880789	0.604537									-0.00735225	0.844249
DNAmLeptinAdjAge	7	Diet	log2(1+Fish)	3	4873	-0.00727257	-0.507114	0.612075	0.213195	-0.0443272	0.259191	-0.0061868	0.715977									0.0195241	0.59144
DNAmLeptinAdjAge	8	Diet	log2(1+Dairy)	3	4868	0.00126751	0.0884093	0.929551	0.0317266	0.0859111	0.0282252	-0.0115056	0.498686									-0.0133596	0.713539
DNAmLeptinAdjAge	9	Diet	log2(1+Whole grains)	2	4108	-0.00752469	-0.481846	0.629915	0.200718	0.0499965	0.204979	-0.0182162	0.284093
DNAmLeptinAdjAge	10	Diet	log2(1+Nuts)	1	3463	0.00264745	0.155719	0.876255	0.0573696			0.00264745	0.876255
DNAmLeptinAdjAge	11	Diet	log2(Fruits)	3	4864	-0.0310612	-2.16556	0.0303447	1.51792	0.0295342	0.455518	-0.0483753	0.00439671									-0.00283522	0.937871
DNAmLeptinAdjAge	12	Diet	log2(Vegetables)	3	4864	-0.0162892	-1.13496	0.256394	0.591092	0.0188394	0.634126	-0.00896566	0.598025									-0.0792604	0.0290739
DNAmLeptinAdjAge	14	Diet	log(OMEGA3)	1	643	0.071917	1.82231	0.0684079	1.16489	0.071917	0.0684079
DNAmLeptinAdjAge	15	Diet	log(VitaminA)	1	651	0.0647078	1.64823	0.0993061	1.00302	0.0647078	0.0993061
DNAmLeptinAdjAge	16	Diet	log(VitaminC)	2	1409	-0.00873254	-0.326874	0.743763	0.128565	-0.00516346	0.895505											-0.0117949	0.746015
DNAmLeptinAdjAge	17	Diet	log(VitaminB6)	2	1407	0.003363	0.125949	0.899772	0.0458674	0.047507	0.226653											-0.0345092	0.34304
DNAmLeptinAdjAge	18	Diet	log(VitaminE)	2	1397	-0.0145614	-0.542771	0.587287	0.231149	-0.0162469	0.682177											-0.0131416	0.718183
DNAmLeptinAdjAge	19	Diet	log(Selenium)	2	1401	-0.00108531	-0.0405242	0.967675	0.0142704	0.032737	0.407656											-0.0297656	0.413598
DNAmLeptinAdjAge	20	Diet	log(Iron)	1	633	0.0667471	1.67734	0.0934764	1.0293	0.0667471	0.0934764
DNAmLeptinAdjAge	21	Diet	log(Zinc)	2	1404	0.0105653	0.394909	0.69291	0.159323	0.0435326	0.269698											-0.0175337	0.630135
DNAmLeptinAdjAge	22	Diet	log(Calcium)	2	1407	-0.0557435	-2.08888	0.0367184	1.43512	-0.0671515	0.0871333											-0.0459401	0.206768
DNAmLeptinAdjAge	23	Diet	log(FolicAcid)	2	1407	-0.0247244	-0.925241	0.354841	0.449967	-0.0142498	0.717324											-0.0336805	0.354755
DNAmLeptinAdjAge	24	Diet	log(VitaminD)	2	1397	-0.0142891	-0.532731	0.59422	0.226053	0.0139411	0.72533											-0.0380427	0.295932
DNAmLeptinAdjAge	25	Diet	log(Copper)	1	643	-0.0460692	-1.16605	0.243593	0.613335	-0.0460692	0.243593
DNAmLeptinAdjAge	26	Diet	log(BrewYeast)	1	643	0.030483	0.771715	0.440283	0.356268	0.030483	0.440283
DNAmLeptinAdjAge	27	Diet	log(BetaCaroteneSup)	1	645	-0.0328791	-0.832733	0.404996	0.39255	-0.0328791	0.404996
DNAmLeptinAdjAge	28	Diet	log(Magnesium)	1	641	0.0436405	1.1025	0.270244	0.568244	0.0436405	0.270244
DNAmLeptinAdjAge	29	Dietary Biomarkers	Retinol	1	2053	0.0225649	1.02115	0.307182	0.512604			0.0225649	0.307182
DNAmLeptinAdjAge	30	Dietary Biomarkers	Mean carotenoids	1	2052	-0.149097	-6.79844	1.05762e-11	10.9757			-0.149097	1.05762e-11
DNAmLeptinAdjAge	31	Dietary Biomarkers	Lycopene	1	2053	-0.0361323	-1.6357	0.101903	0.991813			-0.0361323	0.101903
DNAmLeptinAdjAge	32	Dietary Biomarkers	log2(alpha-Carotene)	1	2053	-0.137686	-6.27333	3.53403e-10	9.45173			-0.137686	3.53403e-10
DNAmLeptinAdjAge	33	Dietary Biomarkers	log2(beta-Carotene)	1	2052	-0.13267	-6.03843	1.55619e-09	8.80794			-0.13267	1.55619e-09
DNAmLeptinAdjAge	34	Dietary Biomarkers	log2(Lutein+Zeaxanthin)	1	2053	-0.106746	-4.85287	1.21689e-06	5.91475			-0.106746	1.21689e-06
DNAmLeptinAdjAge	35	Dietary Biomarkers	log2(beta-Cryptoxanthin)	1	2053	-0.123294	-5.60736	2.05437e-08	7.68732			-0.123294	2.05437e-08
DNAmLeptinAdjAge	36	Dietary Biomarkers	log2(alpha-Tocopherol)	1	2053	-0.0131089	-0.593155	0.553078	0.257214			-0.0131089	0.553078
DNAmLeptinAdjAge	37	Dietary Biomarkers	log2(gamma-Tocopherol)	1	2053	0.0675697	3.06226	0.00219674	2.65822			0.0675697	0.00219674
DNAmLeptinAdjAge	38	Measurements	log(A1C)	1	711	0.163462	4.38653	1.15171e-05	4.93866	0.163462	1.15171e-05
DNAmLeptinAdjAge	39	Measurements	log2(C-reactive protein)	8	11281	0.129264	13.802	2.47928e-43	42.6057	0.20541	3.22421e-08	0.146517	1.7656e-14	0.18734	2.5686e-15	0.0283392	0.286824	0.195379	3.12281e-08	0.0280401	0.717144	0.110447	4.68791e-08	0.0889474	0.00120613
DNAmLeptinAdjAge	40	Measurements	log2(Insulin)	3	5912	0.109508	8.45948	2.68566e-17	16.5709			0.154118	6.8536e-22			0.0322868	0.391899							0.0224784	0.405261
DNAmLeptinAdjAge	41	Measurements	log2(Glucose)	5	7392	0.0875235	7.54188	4.63249e-14	13.3342	0.121251	0.0012052	0.109055	6.9761e-12			0.0464795	0.0801658	0.157651	2.36755e-05					-0.0757446	0.059234
DNAmLeptinAdjAge	42	Measurements	log2(Triglyceride)	6	9847	0.11145	11.1003	1.24967e-28	27.9032	0.184335	7.20863e-07	0.120145	3.70405e-14	0.116447	2.4088e-06	0.0452589	0.0883332	0.140098	8.11588e-05					0.093868	0.000501099
DNAmLeptinAdjAge	43	Measurements	Total cholesterol	8	13002	-0.0106553	-1.21385	0.224804	0.648197	-0.0168304	0.654695	0.00153098	0.923532	0.00899035	0.717182	0.0032837	0.901669	-0.00254196	0.943366	-0.0187166	0.700861	-0.0279555	0.144286	-0.0477648	0.0769555
DNAmLeptinAdjAge	44	Measurements	LDL cholesterol	4	7688	-0.00358375	-0.313979	0.753537	0.122895			-0.00756812	0.637708	0.0165636	0.506205	0.000498333	0.985048	-0.032846	0.359232
DNAmLeptinAdjAge	45	Measurements	HDL cholesterol	6	9844	-0.0840796	-8.35417	6.58926e-17	16.1812	-0.109871	0.00339914	-0.105951	2.66533e-11	-0.0845289	0.000636894	-0.0404133	0.128111	-0.0419277	0.241222					-0.0762536	0.00472834
DNAmLeptinAdjAge	46	Measurements	log2(Creatinine)	3	4770	-0.00381753	-0.263302	0.792318	0.101101	-0.00771596	0.837782	0.00089796	0.963214			-0.0106683	0.688184
DNAmLeptinAdjAge	47	Measurements	log2(IL6)	3	3185	0.00828427	0.469443	0.638753	0.194667							-0.109261	3.65787e-05	0.213745	1.30621e-09					0.0106154	0.739965
DNAmLeptinAdjAge	48	Measurements	log2(TNFA)	3	2621	0.0712817	3.65275	0.000259445	3.58595							0.108937	4.37855e-05	0.0892194	0.167254					0.0127718	0.689501
DNAmLeptinAdjAge	49	Measurements	log2(Urine Creatinine)	3	1793	0.041576	1.75739	0.0788506	1.10319	0.0316735	0.403218			0.0747711	0.139429	0.0328956	0.384272
DNAmLeptinAdjAge	50	Measurements	FEV1	5	5836	-0.0837223	-6.4049	1.50463e-10	9.82257	-0.0977108	0.0175468							-0.172279	2.39939e-05	-0.0217272	0.569487	-0.0871314	4.29014e-06	-0.0598087	0.0390434
DNAmLeptinAdjAge	52	Measurements	Systolic blood pressure	6	11980	0.0314349	3.43952	0.000582741	3.23452	0.0294204	0.43345	0.0395409	0.0128505	0.0116552	0.627021	0.0795044	0.00284464					0.0229037	0.226235	0.002018	0.940556
DNAmLeptinAdjAge	53	Measurements	Diastolic blood pressure	6	11980	0.000342927	0.0375197	0.970071	0.0131966	-0.0345863	0.357526	-0.019466	0.220781	0.0396003	0.09857	0.0640524	0.0162986					0.00281201	0.881882	-0.0447705	0.0978797
DNAmLeptinAdjAge	54	Measurements	log2(Waist / hip ratio)	3	5887	0.143261	11.0646	1.86317e-28	27.7297	0.223444	1.91649e-09	0.141241	1.63338e-18											0.106917	7.33574e-05
DNAmLeptinAdjAge	55	Measurements	BMI	8	13420	0.14598	17.0253	5.32736e-65	64.2735	0.197659	1.0476e-07	0.155874	6.98942e-23	0.209942	5.99433e-19	0.0757324	0.00457028	0.141599	6.82888e-05	0.110047	0.0038802	0.154459	1.99451e-16	0.0813688	0.00255037
DNAmLeptinAdjAge	56	Measurements	MMSE	6	7017	-0.0237517	-1.98683	0.0469409	1.32845	-0.0199557	0.59586	0.0166744	0.631196			0.0286958	0.279749	-0.0619478	0.14189	-0.0346199	0.364189	-0.0529764	0.00510463
DNAmLeptinAdjAge	57	Measurements	Telomere length	3	2193	-0.0648679	-3.03679	0.00239114	2.6214	-0.143131	0.0251253	-0.0510673	0.144553											-0.0578855	0.0517357
DNAmLeptinAdjAge	58	Life style	Education	8	13312	-0.020634	-2.37893	0.0173629	1.76038	-0.0623106	0.131945	-0.0408925	0.0104027	0.0127066	0.595979	-0.00697487	0.793075	-0.0309756	0.387115	0.0239107	0.531053	-0.0316682	0.094055	0.00490386	0.856253
DNAmLeptinAdjAge	59	Life style	Income	3	6687	-0.0428894	-3.50688	0.00045339	3.34353			-0.0503681	0.00180215	-0.0400438	0.120499									-0.0246875	0.365808
DNAmLeptinAdjAge	60	Life style	Hand grip	5	5962	-0.0255789	-1.9781	0.047917	1.31951	-0.0313164	0.469463					0.134376	1.06028e-06	-0.153041	4.62208e-05	-0.0505545	0.206047	-0.0620736	0.0010346
DNAmLeptinAdjAge	61	Life style	log2(1+Exercise)	4	7278	-0.0631498	-5.38921	7.07683e-08	7.15016			-0.0678172	3.55443e-05	-0.0472907	0.0482376			-0.111751	0.00328876					-0.042514	0.153237
DNAmLeptinAdjAge	62	Life style	Current smoker	6	10247	0.0161493	1.63312	0.102443	0.989519	0.0434993	0.246891	0.0318771	0.0465122					0.00600749	0.867313	0.00662752	0.862059	-0.0177075	0.349451	0.0368045	0.173991
DNAmLeptinAdjAge	63	Life style	log2(1+Alcohol)	5	8050	-0.011759	-1.05428	0.291757	0.534979	0.0126131	0.737506	-0.0424837	0.0124305	0.014094	0.562622	0.0343791	0.193871					-0.0387298	0.28732
