# Supplementary material for: DNA methylation GrimAge version 2
Source: Aging (Albany NY). 2022 Dec 14;14(23):9484–549. doi: 10.18632/aging.204434 (PMC9792204; doi:10.18632/aging.204434)
Supplement: Supplementary Table 2.9 [file aging-14-204434-s011.xlsx]

## Sheet: Table S2.9
Supplementary Table 2.9. DNAmlogA1CAdjAge:Diet, clinically relevant measurements, and life style factors.
AgeAccel	order	category	var	NumData	n	Meta.bicor	Meta.bicor.Z	Meta.P	Meta.log10P	bicor.FHS	p.FHS	bicor.WHI	p.WHI	bicor.JHS	p.JHS	bicor.InChianti	p.InChianti	bicor.BLSA	p.BLSA	bicor.LBC21	p.LBC21	bicor.LBC36	p.LBC36	bicor.NAS	p.NAS
DNAmlogA1CAdjAge	1	Diet	log2(Total energy)	2	4221	0.0210322	1.36574	0.172021	0.764418			0.0344115	0.0429441									-0.0401861	0.269103
DNAmlogA1CAdjAge	2	Diet	Carbohydrate	2	4222	-0.0948794	-6.18525	6.2005e-10	9.20757			-0.12002	1.31379e-12									0.0210601	0.562212
DNAmlogA1CAdjAge	3	Diet	Protein	2	4221	0.00568566	0.369116	0.712041	0.147495			0.0109466	0.519675									-0.0184134	0.612842
DNAmlogA1CAdjAge	4	Diet	Fat	2	4221	0.100181	6.52819	6.65705e-11	10.1767			0.12102	8.63414e-13									0.00382743	0.916239
DNAmlogA1CAdjAge	5	Diet	log2(1+Red meat)	3	4873	0.0942139	6.59755	4.18012e-11	10.3788	-0.0292298	0.455544	0.123992	2.32266e-13									0.0631233	0.082132
DNAmlogA1CAdjAge	6	Diet	log2(1+Poultry)	3	4832	0.010546	0.732561	0.463826	0.333645	0.0426294	0.277134	-0.0011411	0.946485									0.0379285	0.310406
DNAmlogA1CAdjAge	7	Diet	log2(1+Fish)	3	4873	-0.0382384	-2.66876	0.00761315	2.11844	-0.0292298	0.455544	-0.0417102	0.0140985									-0.0300952	0.408056
DNAmlogA1CAdjAge	8	Diet	log2(1+Dairy)	3	4868	-0.00862793	-0.60124	0.54768	0.261473	-0.00258689	0.947738	-0.00708825	0.67678									-0.0208121	0.567319
DNAmlogA1CAdjAge	9	Diet	log2(1+Whole grains)	2	4108	-0.0114739	-0.734918	0.462389	0.334992	0.0599989	0.12821	-0.0247533	0.145397
DNAmlogA1CAdjAge	10	Diet	log2(1+Nuts)	1	3463	-0.0254203	-1.49583	0.134699	0.870636			-0.0254203	0.134699
DNAmlogA1CAdjAge	11	Diet	log2(Fruits)	3	4864	-0.0269154	-1.87528	0.0607538	1.21643	-0.0116317	0.768899	-0.0246365	0.14732									-0.0502192	0.167122
DNAmlogA1CAdjAge	12	Diet	log2(Vegetables)	3	4864	-0.0467037	-3.2558	0.00113072	2.94664	-0.0368715	0.351159	-0.0454368	0.00749558									-0.0608058	0.0943406
DNAmlogA1CAdjAge	14	Diet	log(OMEGA3)	1	643	-0.0280821	-0.710647	0.477303	0.321206	-0.0280821	0.477303
DNAmlogA1CAdjAge	15	Diet	log(VitaminA)	1	651	-0.0845496	-2.15789	0.0309362	1.50953	-0.0845496	0.0309362
DNAmlogA1CAdjAge	16	Diet	log(VitaminC)	2	1409	-0.0480348	-1.79952	0.0719364	1.14305	-0.0444036	0.258284											-0.0511508	0.159789
DNAmlogA1CAdjAge	17	Diet	log(VitaminB6)	2	1407	-0.0149817	-0.560884	0.574876	0.240425	0.0328399	0.404005											-0.0558326	0.124776
DNAmlogA1CAdjAge	18	Diet	log(VitaminE)	2	1397	-0.0684707	-2.55681	0.0105638	1.97618	-0.082539	0.0370921											-0.0566061	0.119503
DNAmlogA1CAdjAge	19	Diet	log(Selenium)	2	1401	-0.00451487	-0.168981	0.865812	0.0625764	0.0704599	0.0743917											-0.0678034	0.0616599
DNAmlogA1CAdjAge	20	Diet	log(Iron)	1	633	-0.0202621	-0.508369	0.611194	0.213821	-0.0202621	0.611194
DNAmlogA1CAdjAge	21	Diet	log(Zinc)	2	1404	0.00420838	0.157419	0.874915	0.0580343	0.0544844	0.166849											-0.0386343	0.288289
DNAmlogA1CAdjAge	22	Diet	log(Calcium)	2	1407	-0.0554906	-2.0781	0.0377004	1.42365	-0.0547379	0.164006											-0.0561342	0.122719
DNAmlogA1CAdjAge	23	Diet	log(FolicAcid)	2	1407	-0.0694291	-2.60156	0.00928013	2.03245	-0.0764024	0.0518737											-0.0634604	0.080901
DNAmlogA1CAdjAge	24	Diet	log(VitaminD)	2	1397	-0.0400399	-1.4945	0.135044	0.869525	-0.0228478	0.564442											-0.0544855	0.133833
DNAmlogA1CAdjAge	25	Diet	log(Copper)	1	643	-0.0341696	-0.864147	0.387507	0.41172	-0.0341696	0.387507
DNAmlogA1CAdjAge	26	Diet	log(BrewYeast)	1	643	-0.0429545	-1.08809	0.276556	0.558217	-0.0429545	0.276556
DNAmlogA1CAdjAge	27	Diet	log(BetaCaroteneSup)	1	645	-0.0395613	-1.00221	0.316243	0.499979	-0.0395613	0.316243
DNAmlogA1CAdjAge	28	Diet	log(Magnesium)	1	641	0.00437529	0.110429	0.912069	0.0399722	0.00437529	0.912069
DNAmlogA1CAdjAge	29	Dietary Biomarkers	Retinol	1	2053	0.115599	5.2575	1.46029e-07	6.83556			0.115599	1.46029e-07
DNAmlogA1CAdjAge	30	Dietary Biomarkers	Mean carotenoids	1	2052	-0.286985	-13.4011	5.96136e-41	40.2247			-0.286985	5.96136e-41
DNAmlogA1CAdjAge	31	Dietary Biomarkers	Lycopene	1	2053	-0.106598	-4.85196	1.2225e-06	5.91275			-0.106598	1.2225e-06
DNAmlogA1CAdjAge	32	Dietary Biomarkers	log2(alpha-Carotene)	1	2053	-0.264598	-12.2797	1.16402e-34	33.934			-0.264598	1.16402e-34
DNAmlogA1CAdjAge	33	Dietary Biomarkers	log2(beta-Carotene)	1	2052	-0.267888	-12.4392	1.60088e-35	34.7956			-0.267888	1.60088e-35
DNAmlogA1CAdjAge	34	Dietary Biomarkers	log2(Lutein+Zeaxanthin)	1	2053	-0.179233	-8.21312	2.15511e-16	15.6665			-0.179233	2.15511e-16
DNAmlogA1CAdjAge	35	Dietary Biomarkers	log2(beta-Cryptoxanthin)	1	2053	-0.21304	-9.81501	9.70257e-23	22.0131			-0.21304	9.70257e-23
DNAmlogA1CAdjAge	36	Dietary Biomarkers	log2(alpha-Tocopherol)	1	2053	0.031888	1.4438	0.148794	0.827415			0.031888	0.148794
DNAmlogA1CAdjAge	37	Dietary Biomarkers	log2(gamma-Tocopherol)	1	2053	0.171879	7.85838	3.89145e-15	14.4099			0.171879	3.89145e-15
DNAmlogA1CAdjAge	38	Measurements	log(A1C)	1	711	0.25127	6.82828	8.59366e-12	11.0658	0.25127	8.59366e-12
DNAmlogA1CAdjAge	39	Measurements	log2(C-reactive protein)	8	11281	0.213493	23.0323	2.21575e-117	116.654	0.240288	7.56963e-11	0.286845	4.18088e-53	0.227093	4.89494e-22	0.133505	4.53452e-07	0.134839	0.000148544	0.116983	0.128555	0.189388	3.37681e-21	0.212615	5.59719e-15
DNAmlogA1CAdjAge	40	Measurements	log2(Insulin)	3	5912	0.245963	19.4609	2.35711e-84	83.6276			0.353508	9.98343e-116			-0.0268874	0.476234							0.0578698	0.0320207
DNAmlogA1CAdjAge	41	Measurements	log2(Glucose)	5	7392	0.241657	21.2509	3.23427e-100	99.4902	0.268755	2.39175e-13	0.310895	3.2691e-90			0.180462	6.70102e-12	0.189328	3.32842e-07					-0.0552268	0.16928
DNAmlogA1CAdjAge	42	Measurements	log2(Triglyceride)	6	9847	0.327409	33.7155	3.42614e-249	248.465	0.371273	3.72087e-25	0.356213	1.30299e-120	0.346554	4.23575e-48	0.266649	8.76374e-25	0.279247	1.02409e-15					0.284759	5.4553e-27
DNAmlogA1CAdjAge	43	Measurements	Total cholesterol	8	13002	-0.0393172	-4.48775	7.19779e-06	5.1428	-0.112859	0.0025923	0.0167228	0.294104	0.00959585	0.699052	0.0188571	0.477966	-0.0841709	0.0184478	-0.0783687	0.107058	-0.140973	1.26361e-13	-0.0374373	0.165772
DNAmlogA1CAdjAge	44	Measurements	LDL cholesterol	4	7688	-0.0272948	-2.39348	0.0166894	1.77756			-0.0217968	0.174617	-0.0360391	0.147827	-0.00746925	0.77876	-0.0723182	0.0429584
DNAmlogA1CAdjAge	45	Measurements	HDL cholesterol	6	9844	-0.209814	-21.1332	3.94e-99	98.4045	-0.2249	1.23169e-09	-0.255262	3.4541e-60	-0.140416	1.14649e-08	-0.152863	6.77189e-09	-0.229211	6.92607e-11					-0.197763	1.47955e-13
DNAmlogA1CAdjAge	46	Measurements	log2(Creatinine)	3	4770	-0.0434316	-2.99843	0.00271378	2.56643	0.00626587	0.867955	-0.0643747	0.000927593			-0.028999	0.275202
DNAmlogA1CAdjAge	47	Measurements	log2(IL6)	3	3185	0.0670611	3.78827	0.000151698	3.81902							0.103815	8.78187e-05	0.120218	0.000754487					-0.0292058	0.361078
DNAmlogA1CAdjAge	48	Measurements	log2(TNFA)	3	2621	0.0122698	0.626755	0.53082	0.275053							-0.00694752	0.795105	0.0192119	0.769719					0.038024	0.234102
DNAmlogA1CAdjAge	49	Measurements	log2(Urine Creatinine)	3	1793	0.0868491	3.67672	0.00023625	3.62663	0.129216	0.00060622			0.0366042	0.47111	0.0720649	0.0564839
DNAmlogA1CAdjAge	50	Measurements	FEV1	5	5836	-0.138713	-10.6591	1.58134e-26	25.801	-0.159181	9.78607e-05							-0.123753	0.0025983	-0.0103486	0.786648	-0.157929	5.07547e-17	-0.16369	1.33497e-08
DNAmlogA1CAdjAge	52	Measurements	Systolic blood pressure	6	11980	0.0654528	7.17846	7.05003e-13	12.1518	0.0252135	0.501352	0.123684	5.40112e-15	0.0902574	0.000161219	0.0922024	0.000525356					-0.00617212	0.744204	0.00322511	0.905135
DNAmlogA1CAdjAge	53	Measurements	Diastolic blood pressure	6	11980	0.00774522	0.84765	0.396633	0.401611	-6.76675e-05	0.998564	0.0018639	0.906677	0.0589329	0.0139043	0.0893914	0.000780194					-0.0246659	0.192524	-0.0545373	0.0437165
DNAmlogA1CAdjAge	54	Measurements	log2(Waist / hip ratio)	3	5887	0.312331	24.7885	1.1921e-135	134.924	0.308914	3.16032e-17	0.336346	1.50675e-103											0.244575	4.14774e-20
DNAmlogA1CAdjAge	55	Measurements	BMI	8	13420	0.252706	29.9079	1.55433e-196	195.808	0.304114	7.42743e-17	0.282038	8.32465e-74	0.252291	5.05848e-27	0.185365	2.44241e-12	0.264839	3.4651e-14	0.221731	3.82232e-09	0.243065	3.37132e-39	0.236171	7.39072e-19
DNAmlogA1CAdjAge	56	Measurements	MMSE	6	7017	-0.0542496	-4.54544	5.48198e-06	5.26106	-0.0538003	0.152317	-0.0436948	0.207932			-0.00827306	0.755062	-0.0712783	0.0909999	-0.0431968	0.256261	-0.0800864	2.20516e-05
DNAmlogA1CAdjAge	57	Measurements	Telomere length	3	2193	-0.0499697	-2.34016	0.0192755	1.71499	-0.00858028	0.893757	-0.113568	0.00112341											-0.0124723	0.675351
DNAmlogA1CAdjAge	58	Life style	Education	8	13312	-0.0549995	-6.34837	2.17613e-10	9.66231	-0.13528	0.00101418	-0.0830328	1.87987e-07	0.00753145	0.753294	-0.0390621	0.141656	-0.089786	0.0120597	0.0236172	0.536004	-0.0600697	0.00147334	-0.0449393	0.096742
DNAmlogA1CAdjAge	59	Life style	Income	3	6687	-0.0785763	-6.4344	1.23961e-10	9.90671			-0.0800222	6.87995e-07	-0.0661871	0.0101798									-0.088294	0.00119434
DNAmlogA1CAdjAge	60	Life style	Hand grip	5	5962	-0.0564628	-4.35929	1.30486e-05	4.88444	-0.0732177	0.0899807					-0.027848	0.314452	-0.0446203	0.238473	-0.0265054	0.507803	-0.0762372	5.52297e-05
DNAmlogA1CAdjAge	61	Life style	log2(1+Exercise)	4	7278	-0.0951878	-8.13661	4.06485e-16	15.391			-0.0914743	2.34464e-08	-0.0845784	0.000402113			-0.136175	0.000334494					-0.0986871	0.000894215
DNAmlogA1CAdjAge	62	Life style	Current smoker	6	10247	0.0864644	8.76492	1.86907e-18	17.7284	0.102166	0.00635325	0.0793749	6.85151e-07					0.103129	0.00395246	0.0814179	0.0324468	0.101495	7.4185e-08	0.0606969	0.0248751
DNAmlogA1CAdjAge	63	Life style	log2(1+Alcohol)	5	8050	-0.0155811	-1.39755	0.162249	0.789818	0.0362988	0.334138	-0.0557826	0.0010262	0.0215963	0.37496	0.0429515	0.104545					-0.0734428	0.0433089
