# Supplementary material for: DNA methylation GrimAge version 2
Source: Aging (Albany NY). 2022 Dec 14;14(23):9484–549. doi: 10.18632/aging.204434 (PMC9792204; doi:10.18632/aging.204434)
Supplement: Supplementary Table 2.10 [file aging-14-204434-s012.xlsx]

## Sheet: Table S2.10
Supplementary Table 2.10. DNAmlogCRPAdjAge:Diet, clinically relevant measurements, and life style factors.
AgeAccel	order	category	var	NumData	n	Meta.bicor	Meta.bicor.Z	Meta.P	Meta.log10P	bicor.FHS	p.FHS	bicor.WHI	p.WHI	bicor.JHS	p.JHS	bicor.InChianti	p.InChianti	bicor.BLSA	p.BLSA	bicor.LBC21	p.LBC21	bicor.LBC36	p.LBC36	bicor.NAS	p.NAS
DNAmlogCRPAdjAge	1	Diet	log2(Total energy)	2	4221	0.00112129	0.0727777	0.941983	0.0259569			0.00977318	0.565497									-0.0385103	0.290024
DNAmlogCRPAdjAge	2	Diet	Carbohydrate	2	4222	-0.0933192	-6.07897	1.20957e-09	8.91737			-0.104834	6.11953e-10									-0.0405468	0.263626
DNAmlogCRPAdjAge	3	Diet	Protein	2	4221	0.0233829	1.51792	0.129034	0.889296			0.0333689	0.0496743									-0.0224208	0.538043
DNAmlogCRPAdjAge	4	Diet	Fat	2	4221	0.0735447	4.78387	1.71951e-06	5.7646			0.0894803	1.31748e-07									5.74992e-05	0.99874
DNAmlogCRPAdjAge	5	Diet	log2(1+Red meat)	3	4873	0.0710042	4.96562	6.84802e-07	6.16443	-0.0546466	0.163979	0.105242	5.15376e-10									0.0208751	0.566139
DNAmlogCRPAdjAge	6	Diet	log2(1+Poultry)	3	4832	-0.0132825	-0.922706	0.35616	0.448354	0.0708732	0.0706577	-0.0197764	0.244758									-0.0583776	0.118304
DNAmlogCRPAdjAge	7	Diet	log2(1+Fish)	3	4873	-0.0183154	-1.27764	0.201377	0.695991	-0.0546466	0.163979	-0.0181544	0.285414									0.0121581	0.738311
DNAmlogCRPAdjAge	8	Diet	log2(1+Dairy)	3	4868	-0.0227586	-1.58652	0.112622	0.948377	0.00133458	0.973007	-0.0376281	0.0268462									0.0248647	0.494336
DNAmlogCRPAdjAge	9	Diet	log2(1+Whole grains)	2	4108	-0.0319161	-2.04529	0.0408266	1.38906	0.0509	0.196379	-0.0473253	0.00535715
DNAmlogCRPAdjAge	10	Diet	log2(1+Nuts)	1	3463	-0.0613312	-3.61148	0.000304452	3.51648			-0.0613312	0.000304452
DNAmlogCRPAdjAge	11	Diet	log2(Fruits)	3	4864	-0.0723789	-5.05385	4.32998e-07	6.36351	0.0081925	0.835998	-0.0737814	1.37363e-05									-0.133332	0.000228134
DNAmlogCRPAdjAge	12	Diet	log2(Vegetables)	3	4864	-0.0558453	-3.89626	9.76884e-05	4.01016	0.0236031	0.55096	-0.0541578	0.00143235									-0.129859	0.00033094
DNAmlogCRPAdjAge	14	Diet	log(OMEGA3)	1	643	-0.0414258	-1.04781	0.294728	0.530578	-0.0414258	0.294728
DNAmlogCRPAdjAge	15	Diet	log(VitaminA)	1	651	-0.00626417	-0.159371	0.873377	0.0587985	-0.00626417	0.873377
DNAmlogCRPAdjAge	16	Diet	log(VitaminC)	2	1409	-0.0769488	-2.89063	0.00384469	2.41514	-0.00799597	0.838738											-0.135458	0.000182083
DNAmlogCRPAdjAge	17	Diet	log(VitaminB6)	2	1407	-0.0101386	-0.379562	0.704271	0.15226	0.0405225	0.30312											-0.053427	0.141895
DNAmlogCRPAdjAge	18	Diet	log(VitaminE)	2	1397	-0.0309735	-1.15482	0.248165	0.60526	-0.024237	0.54126											-0.036644	0.314067
DNAmlogCRPAdjAge	19	Diet	log(Selenium)	2	1401	-0.0378257	-1.41345	0.157523	0.802655	0.00237179	0.952165											-0.0718111	0.0482343
DNAmlogCRPAdjAge	20	Diet	log(Iron)	1	633	-0.0293417	-0.736431	0.461468	0.335858	-0.0293417	0.461468
DNAmlogCRPAdjAge	21	Diet	log(Zinc)	2	1404	-0.0231092	-0.863807	0.387694	0.411511	-0.00225356	0.954452											-0.0408575	0.261635
DNAmlogCRPAdjAge	22	Diet	log(Calcium)	2	1407	-0.0364774	-1.36547	0.172107	0.764202	-0.0581085	0.139538											-0.0179473	0.621976
DNAmlogCRPAdjAge	23	Diet	log(FolicAcid)	2	1407	-0.0786293	-2.94803	0.00319801	2.49512	-0.0697296	0.0759061											-0.0862392	0.0175987
DNAmlogCRPAdjAge	24	Diet	log(VitaminD)	2	1397	-0.0488774	-1.82383	0.068177	1.16636	-0.0799345	0.0435195											-0.022628	0.534215
DNAmlogCRPAdjAge	25	Diet	log(Copper)	1	643	-0.0287415	-0.726866	0.467308	0.330397	-0.0287415	0.467308
DNAmlogCRPAdjAge	26	Diet	log(BrewYeast)	1	643	-0.0110596	-0.279821	0.779615	0.10812	-0.0110596	0.779615
DNAmlogCRPAdjAge	27	Diet	log(BetaCaroteneSup)	1	645	0.0298293	0.755934	0.449689	0.347088	0.0298293	0.449689
DNAmlogCRPAdjAge	28	Diet	log(Magnesium)	1	641	0.0275429	0.695332	0.486847	0.312607	0.0275429	0.486847
DNAmlogCRPAdjAge	29	Dietary Biomarkers	Retinol	1	2053	-0.0275897	-1.24927	0.211568	0.67455			-0.0275897	0.211568
DNAmlogCRPAdjAge	30	Dietary Biomarkers	Mean carotenoids	1	2052	-0.28812	-13.4275	4.17093e-41	40.3798			-0.28812	4.17093e-41
DNAmlogCRPAdjAge	31	Dietary Biomarkers	Lycopene	1	2053	-0.102311	-4.65021	3.31604e-06	5.47938			-0.102311	3.31604e-06
DNAmlogCRPAdjAge	32	Dietary Biomarkers	log2(alpha-Carotene)	1	2053	-0.270526	-12.5582	3.58269e-36	35.4458			-0.270526	3.58269e-36
DNAmlogCRPAdjAge	33	Dietary Biomarkers	log2(beta-Carotene)	1	2052	-0.262772	-12.1754	4.20205e-34	33.3765			-0.262772	4.20205e-34
DNAmlogCRPAdjAge	34	Dietary Biomarkers	log2(Lutein+Zeaxanthin)	1	2053	-0.199742	-9.16413	4.99478e-20	19.3015			-0.199742	4.99478e-20
DNAmlogCRPAdjAge	35	Dietary Biomarkers	log2(beta-Cryptoxanthin)	1	2053	-0.22183	-10.2118	1.75497e-24	23.7557			-0.22183	1.75497e-24
DNAmlogCRPAdjAge	36	Dietary Biomarkers	log2(alpha-Tocopherol)	1	2053	-0.0747479	-3.38901	0.000701456	3.154			-0.0747479	0.000701456
DNAmlogCRPAdjAge	37	Dietary Biomarkers	log2(gamma-Tocopherol)	1	2053	0.167041	7.63016	2.3446e-14	13.6299			0.167041	2.3446e-14
DNAmlogCRPAdjAge	38	Measurements	log(A1C)	1	711	0.172385	4.62986	3.65908e-06	5.43663	0.172385	3.65908e-06
DNAmlogCRPAdjAge	39	Measurements	log2(C-reactive protein)	8	11281	0.363599	40.4602	0	357.182	0.460844	6.20813e-40	0.392949	2.80296e-103	0.392914	2.82085e-67	0.287205	1.14603e-28	0.355914	2.12958e-25	0.198539	0.00924919	0.35217	2.07184e-73	0.331224	3.23474e-35
DNAmlogCRPAdjAge	40	Measurements	log2(Insulin)	3	5912	0.204608	16.008	1.12373e-57	56.9493			0.279049	1.9207e-70			0.0351336	0.351922							0.0723061	0.0073556
DNAmlogCRPAdjAge	41	Measurements	log2(Glucose)	5	7392	0.144928	12.5499	3.97771e-36	35.4004	0.164563	1.02064e-05	0.179931	4.38064e-30			0.0791646	0.00284376	0.21144	1.16756e-08					-0.0318386	0.428352
DNAmlogCRPAdjAge	42	Measurements	log2(Triglyceride)	6	9847	0.166524	16.6863	1.64895e-62	61.7828	0.27838	2.88146e-14	0.192548	2.35965e-34	0.109297	9.80411e-06	0.0697574	0.008565	0.273269	4.53464e-15					0.134004	6.36765e-07
DNAmlogCRPAdjAge	43	Measurements	Total cholesterol	8	13002	-0.109134	-12.4934	8.11241e-36	35.0908	-0.0780782	0.0376275	-0.0543126	0.000650977	-0.0916131	0.000214452	-0.11579	1.19373e-05	-0.0608519	0.0887022	-0.200655	2.95502e-05	-0.169449	4.11487e-19	-0.171811	1.49532e-10
DNAmlogCRPAdjAge	44	Measurements	LDL cholesterol	4	7688	-0.0778122	-6.83324	8.30174e-12	11.0808			-0.0609577	0.000145144	-0.0910692	0.000246957	-0.112318	2.2327e-05	-0.0711864	0.0464943
DNAmlogCRPAdjAge	45	Measurements	HDL cholesterol	6	9844	-0.166707	-16.691	1.52446e-62	61.8169	-0.246349	2.40063e-11	-0.195745	1.96109e-35	-0.0929486	0.00016992	-0.127408	1.43551e-06	-0.162746	4.29065e-06					-0.170001	2.37255e-10
DNAmlogCRPAdjAge	46	Measurements	log2(Creatinine)	3	4770	0.0310717	2.14408	0.0320268	1.49449	0.0625862	0.0963516	0.0246197	0.205973			0.0273882	0.302587
DNAmlogCRPAdjAge	47	Measurements	log2(IL6)	3	3185	0.165003	9.41192	4.87135e-21	20.3124							0.211047	7.14535e-16	0.247504	1.66118e-12					0.0276264	0.387641
DNAmlogCRPAdjAge	48	Measurements	log2(TNFA)	3	2621	0.0926745	4.75035	2.03069e-06	5.69236							0.110406	3.42552e-05	0.131672	0.0422227					0.057766	0.0705306
DNAmlogCRPAdjAge	49	Measurements	log2(Urine Creatinine)	3	1793	0.0741179	3.13664	0.00170894	2.76727	0.0792481	0.0358504			0.03784	0.456362	0.0890119	0.0183368
DNAmlogCRPAdjAge	50	Measurements	FEV1	5	5836	-0.216183	-16.7768	3.6095e-63	62.4426	-0.233668	7.76086e-09							-0.176159	1.61298e-05	-0.119092	0.00172973	-0.257442	9.2132e-44	-0.183875	1.62019e-10
DNAmlogCRPAdjAge	52	Measurements	Systolic blood pressure	6	11980	0.0300493	3.29319	0.000990581	3.00411	0.0197792	0.598423	0.108671	6.83449e-12	0.0361218	0.131922	0.00907601	0.732867					-0.0339612	0.0726621	-0.0490428	0.0697775
DNAmlogCRPAdjAge	53	Measurements	Diastolic blood pressure	6	11980	-0.0106755	-1.16857	0.242577	0.61515	-0.0247654	0.510414	0.0169542	0.286099	-0.0235906	0.325211	0.0477268	0.0732544					-0.014449	0.445304	-0.11851	1.10888e-05
DNAmlogCRPAdjAge	54	Measurements	log2(Waist / hip ratio)	3	5887	0.245864	19.2628	1.10296e-82	81.9574	0.354845	1.08119e-22	0.249451	8.96727e-56											0.176097	5.25979e-11
DNAmlogCRPAdjAge	55	Measurements	BMI	8	13420	0.225312	26.5705	1.48797e-155	154.827	0.3264	2.34811e-19	0.270976	5.92947e-68	0.222539	2.90992e-21	0.159123	2.04394e-09	0.293969	2.76263e-17	0.108119	0.00458755	0.223691	2.87081e-33	0.125643	3.01393e-06
DNAmlogCRPAdjAge	56	Measurements	MMSE	6	7017	-0.0679095	-5.69233	1.2532e-08	7.90198	-0.0873065	0.0200313	-0.0626088	0.0711892			-0.0249296	0.346164	-0.135556	0.00123561	-0.0479053	0.209011	-0.0776687	3.9293e-05
DNAmlogCRPAdjAge	57	Measurements	Telomere length	3	2193	-0.0754358	-3.53732	0.000404211	3.39339	-0.029001	0.652273	-0.162793	2.76672e-06											-0.0211826	0.476864
DNAmlogCRPAdjAge	58	Life style	Education	8	13312	-0.0736176	-8.50387	1.83379e-17	16.7366	-0.0879307	0.0332798	-0.0901787	1.48549e-08	-0.0502401	0.0359331	-0.0179676	0.498899	-0.102269	0.0042303	-0.0670522	0.0778059	-0.103526	3.98476e-08	-0.0325102	0.229668
DNAmlogCRPAdjAge	59	Life style	Income	3	6687	-0.0825029	-6.76274	1.3541e-11	10.8684			-0.09592	2.57267e-09	-0.134264	1.64987e-07									0.0146769	0.590858
DNAmlogCRPAdjAge	60	Life style	Hand grip	5	5962	-0.0807988	-6.24771	4.16515e-10	9.38037	-0.102218	0.017781					-0.0440115	0.111795	-0.0585329	0.120508	-0.0504139	0.207215	-0.106167	1.86317e-08
DNAmlogCRPAdjAge	61	Life style	log2(1+Exercise)	4	7278	-0.124685	-10.6849	1.19724e-26	25.9218			-0.124232	2.83666e-14	-0.119622	5.25437e-07			-0.156188	3.64012e-05					-0.114652	0.000112203
DNAmlogCRPAdjAge	62	Life style	Current smoker	6	10247	0.123816	12.5906	2.37794e-36	35.6238	0.147656	7.57847e-05	0.124375	5.87798e-15					0.0722348	0.0441384	0.0606684	0.111359	0.175309	8.08379e-21	0.0634737	0.0189673
DNAmlogCRPAdjAge	63	Life style	log2(1+Alcohol)	5	8050	-0.017773	-1.59481	0.110755	0.955639	0.0561625	0.135151	-0.0652591	0.000121191	0.0394604	0.104683	0.0096497	0.715395					-0.0488495	0.179065
