# Supplementary material for: DNA methylation GrimAge version 2
Source: Aging (Albany NY). 2022 Dec 14;14(23):9484–549. doi: 10.18632/aging.204434 (PMC9792204; doi:10.18632/aging.204434)
Supplement: Supplementary Table 2.11 [file aging-14-204434-s013.xlsx]

## Sheet: Table S2.11
Supplementary Table 2.11. DNAmPACKYRSAdjAge:Diet, clinically relevant measurements, and life style factors.
AgeAccel	order	category	var	NumData	n	Meta.bicor	Meta.bicor.Z	Meta.P	Meta.log10P	bicor.FHS	p.FHS	bicor.WHI	p.WHI	bicor.JHS	p.JHS	bicor.InChianti	p.InChianti	bicor.BLSA	p.BLSA	bicor.LBC21	p.LBC21	bicor.LBC36	p.LBC36	bicor.NAS	p.NAS
DNAmPACKYRSAdjAge	1	Diet	log2(Total energy)	2	4221	-0.0242859	-1.57655	0.1149	0.939682			-0.0206839	0.223785									-0.0407916	0.262389
DNAmPACKYRSAdjAge	2	Diet	Carbohydrate	2	4222	-0.073632	-4.78998	1.66797e-06	5.77781			-0.0866598	3.2279e-07									-0.0136738	0.707055
DNAmPACKYRSAdjAge	3	Diet	Protein	2	4221	-0.00612236	-0.397388	0.691081	0.160471			0.00368543	0.828442									-0.0509939	0.160973
DNAmPACKYRSAdjAge	4	Diet	Fat	2	4221	0.0295678	1.91977	0.0548867	1.26053			0.0397036	0.0195008									-0.0169292	0.641925
DNAmPACKYRSAdjAge	5	Diet	log2(1+Red meat)	3	4873	0.00255733	0.178583	0.858265	0.0663784	-0.104788	0.00737382	0.0116214	0.493985									0.0536867	0.139212
DNAmPACKYRSAdjAge	6	Diet	log2(1+Poultry)	3	4832	0.032984	2.29059	0.0219871	1.65783	0.0386281	0.325586	0.0335109	0.0487081									0.0253235	0.498275
DNAmPACKYRSAdjAge	7	Diet	log2(1+Fish)	3	4873	-0.0133868	-0.934049	0.350279	0.455587	-0.104788	0.00737382	0.00432408	0.799256									-0.0153695	0.672666
DNAmPACKYRSAdjAge	8	Diet	log2(1+Dairy)	3	4868	-0.0427948	-2.98394	0.00284567	2.54582	-0.0383879	0.330185	-0.0356006	0.0362507									-0.0793583	0.0288622
DNAmPACKYRSAdjAge	9	Diet	log2(1+Whole grains)	2	4108	-0.0362525	-2.32182	0.0202426	1.69373	-0.0277532	0.482129	-0.0378279	0.0260646
DNAmPACKYRSAdjAge	10	Diet	log2(1+Nuts)	1	3463	-0.00520511	-0.306051	0.759566	0.119435			-0.00520511	0.759566
DNAmPACKYRSAdjAge	11	Diet	log2(Fruits)	3	4864	-0.0894524	-6.25436	3.99141e-10	9.39887	-0.0793315	0.0445172	-0.0736325	1.42342e-05									-0.168987	2.63439e-06
DNAmPACKYRSAdjAge	12	Diet	log2(Vegetables)	3	4864	-0.0461949	-3.21978	0.00128288	2.89181	-0.0337918	0.393182	-0.0390556	0.0215902									-0.0891766	0.0140146
DNAmPACKYRSAdjAge	14	Diet	log(OMEGA3)	1	643	-0.0174105	-0.440445	0.659615	0.18071	-0.0174105	0.659615
DNAmPACKYRSAdjAge	15	Diet	log(VitaminA)	1	651	-0.0261405	-0.665489	0.505738	0.296075	-0.0261405	0.505738
DNAmPACKYRSAdjAge	16	Diet	log(VitaminC)	2	1409	-0.095118	-3.58179	0.000341254	3.46692	0.00241158	0.951072											-0.17706	8.87627e-07
DNAmPACKYRSAdjAge	17	Diet	log(VitaminB6)	2	1407	-0.100621	-3.77732	0.000158524	3.7999	-0.0714894	0.0689453											-0.125366	0.000538874
DNAmPACKYRSAdjAge	18	Diet	log(VitaminE)	2	1397	-0.110627	-4.14419	3.4102e-05	4.46722	-0.0796834	0.0440827											-0.136452	0.000160716
DNAmPACKYRSAdjAge	19	Diet	log(Selenium)	2	1401	-0.0556823	-2.08156	0.037383	1.42733	-0.0109484	0.781956											-0.0933758	0.0101256
DNAmPACKYRSAdjAge	20	Diet	log(Iron)	1	633	-0.0168228	-0.422031	0.673002	0.171984	-0.0168228	0.673002
DNAmPACKYRSAdjAge	21	Diet	log(Zinc)	2	1404	-0.0522718	-1.95631	0.050429	1.29732	-0.00278492	0.943737											-0.0941709	0.00949959
DNAmPACKYRSAdjAge	22	Diet	log(Calcium)	2	1407	-0.108831	-4.08843	4.3431e-05	4.3622	-0.111281	0.00450678											-0.106731	0.00326156
DNAmPACKYRSAdjAge	23	Diet	log(FolicAcid)	2	1407	-0.117986	-4.43647	9.14466e-06	5.03883	-0.0724436	0.0653055											-0.156446	1.48125e-05
DNAmPACKYRSAdjAge	24	Diet	log(VitaminD)	2	1397	-0.0658643	-2.45995	0.0138956	1.85712	-0.0795001	0.0444817											-0.0543402	0.135146
DNAmPACKYRSAdjAge	25	Diet	log(Copper)	1	643	-0.0582557	-1.4745	0.140347	0.852797	-0.0582557	0.140347
DNAmPACKYRSAdjAge	26	Diet	log(BrewYeast)	1	643	0.00536679	0.135716	0.892046	0.0496129	0.00536679	0.892046
DNAmPACKYRSAdjAge	27	Diet	log(BetaCaroteneSup)	1	645	-0.0397079	-1.00587	0.314479	0.502408	-0.0397079	0.314479
DNAmPACKYRSAdjAge	28	Diet	log(Magnesium)	1	641	-0.0301706	-0.76183	0.446161	0.350508	-0.0301706	0.446161
DNAmPACKYRSAdjAge	29	Dietary Biomarkers	Retinol	1	2053	0.0381134	1.72611	0.0843278	1.07403			0.0381134	0.0843278
DNAmPACKYRSAdjAge	30	Dietary Biomarkers	Mean carotenoids	1	2052	-0.127927	-5.82003	5.88378e-09	8.23034			-0.127927	5.88378e-09
DNAmPACKYRSAdjAge	31	Dietary Biomarkers	Lycopene	1	2053	-0.0322634	-1.46068	0.144102	0.841329			-0.0322634	0.144102
DNAmPACKYRSAdjAge	32	Dietary Biomarkers	log2(alpha-Carotene)	1	2053	-0.124635	-5.67251	1.4072e-08	7.85164			-0.124635	1.4072e-08
DNAmPACKYRSAdjAge	33	Dietary Biomarkers	log2(beta-Carotene)	1	2052	-0.107808	-4.89734	9.71405e-07	6.0126			-0.107808	9.71405e-07
DNAmPACKYRSAdjAge	34	Dietary Biomarkers	log2(Lutein+Zeaxanthin)	1	2053	-0.0515765	-2.3356	0.0195121	1.7097			-0.0515765	0.0195121
DNAmPACKYRSAdjAge	35	Dietary Biomarkers	log2(beta-Cryptoxanthin)	1	2053	-0.108552	-4.93075	8.19129e-07	6.08665			-0.108552	8.19129e-07
DNAmPACKYRSAdjAge	36	Dietary Biomarkers	log2(alpha-Tocopherol)	1	2053	0.0099197	0.448893	0.653509	0.184748			0.0099197	0.653509
DNAmPACKYRSAdjAge	37	Dietary Biomarkers	log2(gamma-Tocopherol)	1	2053	-0.00182656	-0.0826803	0.934106	0.0296039			-0.00182656	0.934106
DNAmPACKYRSAdjAge	38	Measurements	log(A1C)	1	711	0.11244	3.00262	0.00267666	2.57241	0.11244	0.00267666
DNAmPACKYRSAdjAge	39	Measurements	log2(C-reactive protein)	8	11281	0.130962	14.0006	1.54454e-44	43.8112	0.218081	4.07584e-09	0.0951077	7.25822e-07	0.0892482	0.000186255	0.117585	8.56244e-06	0.0069971	0.844941	0.159812	0.037659	0.200714	9.0528e-24	0.163167	2.41572e-09
DNAmPACKYRSAdjAge	40	Measurements	log2(Insulin)	3	5912	0.0270629	2.08123	0.0374132	1.42697			0.0303062	0.0605249			-0.0765877	0.0423193							0.0709742	0.00851832
DNAmPACKYRSAdjAge	41	Measurements	log2(Glucose)	5	7392	0.0431503	3.7137	0.000204251	3.68984	0.103585	0.0057312	0.0694817	1.29638e-05			0.0328551	0.216332	0.0588719	0.11735					-0.183088	4.38591e-06
DNAmPACKYRSAdjAge	42	Measurements	log2(Triglyceride)	6	9847	0.0712817	7.07832	1.45909e-12	11.8359	0.133221	0.000368907	0.0656405	3.78977e-05	0.0253586	0.30685	0.0819651	0.00199813	0.0629986	0.0780652					0.103063	0.000131939
DNAmPACKYRSAdjAge	43	Measurements	Total cholesterol	8	13002	-0.0186202	-2.12374	0.033692	1.47247	-0.0286833	0.445641	0.0373984	0.0189821	-0.000370878	0.988061	0.0225428	0.396119	-0.058071	0.103896	-0.0712703	0.142637	-0.0857508	7.14611e-06	-0.0652927	0.0155695
DNAmPACKYRSAdjAge	44	Measurements	LDL cholesterol	4	7688	0.00113359	0.0994094	0.920813	0.0358285			0.0271145	0.0915067	-0.0274869	0.268932	0.013366	0.615366	-0.0899452	0.0116612
DNAmPACKYRSAdjAge	45	Measurements	HDL cholesterol	6	9844	-0.00493896	-0.489798	0.624277	0.204623	-0.0740892	0.0486273	-0.00883069	0.580107	0.059747	0.0158344	-0.00236432	0.929016	0.0270825	0.449601					-0.0558491	0.0386726
DNAmPACKYRSAdjAge	46	Measurements	log2(Creatinine)	3	4770	0.0183816	1.26876	0.204525	0.689253	0.000740762	0.984286	0.00294309	0.879818			0.0559127	0.0352519
DNAmPACKYRSAdjAge	47	Measurements	log2(IL6)	3	3185	0.0753402	4.26122	2.03312e-05	4.69184							0.144105	4.6735e-08	-0.00535391	0.880935					0.0388965	0.223772
DNAmPACKYRSAdjAge	48	Measurements	log2(TNFA)	3	2621	0.0710947	3.64278	0.000269714	3.5691							0.0943629	0.000405728	-0.0962305	0.137736					0.0783465	0.0141069
DNAmPACKYRSAdjAge	49	Measurements	log2(Urine Creatinine)	3	1793	-0.0296842	-1.25579	0.209193	0.679454	0.00802861	0.831914			-0.0979755	0.0523169	-0.0290646	0.442381
DNAmPACKYRSAdjAge	50	Measurements	FEV1	5	5836	-0.26689	-20.8978	5.60384e-97	96.2515	-0.258578	1.3757e-10							-0.151383	0.000211858	-0.239657	1.63205e-10	-0.254649	9.18807e-43	-0.365673	5.46504e-39
DNAmPACKYRSAdjAge	52	Measurements	Systolic blood pressure	6	11980	0.0191051	2.09035	0.0365868	1.43668	0.0405463	0.280697	0.0125093	0.431501	0.0402906	0.0928233	0.0588199	0.0271597					-0.0116866	0.536906	0.022019	0.415783
DNAmPACKYRSAdjAge	53	Measurements	Diastolic blood pressure	6	11980	-0.044679	-4.89019	1.0074e-06	5.9968	-0.0499219	0.1842	-0.0555324	0.000470835	-0.0268589	0.26264	-0.0165538	0.535161					-0.0362143	0.0556591	-0.0792043	0.00337421
DNAmPACKYRSAdjAge	54	Measurements	log2(Waist / hip ratio)	3	5887	0.107452	8.26874	1.35385e-16	15.8684	0.117539	0.00180946	0.101895	2.76823e-10											0.117746	1.24569e-05
DNAmPACKYRSAdjAge	55	Measurements	BMI	8	13420	0.024959	2.89247	0.0038222	2.41769	0.0976429	0.00927883	-0.000230725	0.988463	-0.0612226	0.0103222	0.0317287	0.235816	0.0401222	0.261204	-0.00699013	0.855089	0.0625343	0.000944519	0.093128	0.00055002
DNAmPACKYRSAdjAge	56	Measurements	MMSE	6	7017	-0.093066	-7.81987	5.28783e-15	14.2767	-0.184772	6.30323e-07	-0.0488497	0.158721			-0.0875676	0.000929244	-0.0165031	0.694105	-0.10394	0.00626043	-0.0980334	2.01451e-07
DNAmPACKYRSAdjAge	57	Measurements	Telomere length	3	2193	-0.094713	-4.44241	8.89548e-06	5.05083	-0.0200724	0.755084	-0.142447	4.2351e-05											-0.0758077	0.0107982
DNAmPACKYRSAdjAge	58	Life style	Education	8	13312	-0.0819628	-9.47582	2.64666e-21	20.5773	-0.169889	3.34042e-05	-0.0634179	6.9872e-05	-0.11562	1.24141e-06	-0.0293867	0.268993	-0.0402573	0.261383	-0.0995994	0.00880842	-0.0906218	1.50041e-06	-0.104892	0.000102188
DNAmPACKYRSAdjAge	59	Life style	Income	3	6687	-0.0839122	-6.87985	5.99158e-12	11.2225			-0.0720295	7.94168e-06	-0.176213	5.10721e-12									-0.0124346	0.648782
DNAmPACKYRSAdjAge	60	Life style	Hand grip	5	5962	-0.0741043	-5.72746	1.01943e-08	7.99164	-0.0608599	0.15884					-0.0825845	0.00280778	-0.0940191	0.0125412	-0.0892606	0.0252138	-0.0642382	0.000683831
DNAmPACKYRSAdjAge	61	Life style	log2(1+Exercise)	4	7278	-0.0418695	-3.57205	0.000354202	3.45075			-0.0125044	0.446482	-0.0794151	0.000892023			-0.0385959	0.311248					-0.0819203	0.00586252
DNAmPACKYRSAdjAge	62	Life style	Current smoker	6	10247	0.342749	36.2377	1.55521e-287	286.808	0.317119	2.44206e-18	0.349856	2.38132e-116					0.174186	9.71979e-07	0.369631	2.31261e-24	0.393013	8.66203e-107	0.304926	8.74718e-31
DNAmPACKYRSAdjAge	63	Life style	log2(1+Alcohol)	5	8050	0.0539355	4.84986	1.23547e-06	5.90817	0.0135405	0.718547	0.0673431	7.09903e-05	0.0964828	6.68247e-05	0.0264261	0.317836					-0.0137159	0.705365
