# Supplementary material for: DNA methylation GrimAge version 2
Source: Aging (Albany NY). 2022 Dec 14;14(23):9484–549. doi: 10.18632/aging.204434 (PMC9792204; doi:10.18632/aging.204434)
Supplement: Supplementary Table 2.12 [file aging-14-204434-s014.xlsx]

## Sheet: Table S2.12
Supplementary Table 2.12. DNAmPAI1AdjAge:Diet, clinically relevant measurements, and life style factors.
AgeAccel	order	category	var	NumData	n	Meta.bicor	Meta.bicor.Z	Meta.P	Meta.log10P	bicor.FHS	p.FHS	bicor.WHI	p.WHI	bicor.JHS	p.JHS	bicor.InChianti	p.InChianti	bicor.BLSA	p.BLSA	bicor.LBC21	p.LBC21	bicor.LBC36	p.LBC36	bicor.NAS	p.NAS
DNAmPAI1AdjAge	1	Diet	log2(Total energy)	2	4221	0.0105531	0.685418	0.49308	0.307082			0.0240224	0.157596									-0.0509719	0.160608
DNAmPAI1AdjAge	2	Diet	Carbohydrate	2	4222	-0.119437	-7.80133	6.12587e-15	14.2128			-0.140348	9.78629e-17									-0.0233915	0.518248
DNAmPAI1AdjAge	3	Diet	Protein	2	4221	0.0112093	0.727695	0.4668	0.330869			0.0181427	0.285963									-0.0205315	0.572509
DNAmPAI1AdjAge	4	Diet	Fat	2	4221	0.0819301	5.33475	9.56737e-08	7.01921			0.106035	3.88324e-10									-0.029172	0.42254
DNAmPAI1AdjAge	5	Diet	log2(1+Red meat)	3	4873	0.0995311	6.96523	3.27859e-12	11.4843	0.0310104	0.429765	0.106331	3.45456e-10									0.126654	0.000462975
DNAmPAI1AdjAge	6	Diet	log2(1+Poultry)	3	4832	0.00684517	0.475338	0.634546	0.197537	0.0335498	0.392665	0.00381111	0.822649									-0.00273465	0.941745
DNAmPAI1AdjAge	7	Diet	log2(1+Fish)	3	4873	0.0168858	1.17768	0.238925	0.621738	0.0310104	0.429765	0.00923222	0.587104									0.0397966	0.273831
DNAmPAI1AdjAge	8	Diet	log2(1+Dairy)	3	4868	-0.0237604	-1.65617	0.097687	1.01016	-0.0178583	0.650736	-0.0168185	0.322597									-0.0604961	0.0960432
DNAmPAI1AdjAge	9	Diet	log2(1+Whole grains)	2	4108	-0.030685	-1.96579	0.0493227	1.30695	0.0352418	0.371846	-0.0429125	0.0115721
DNAmPAI1AdjAge	10	Diet	log2(1+Nuts)	1	3463	-0.0272421	-1.60255	0.109034	0.96244			-0.0272421	0.109034
DNAmPAI1AdjAge	11	Diet	log2(Fruits)	3	4864	-0.0529673	-3.69558	0.000219387	3.65879	-0.0376754	0.34091	-0.0426248	0.0120735									-0.112895	0.00183732
DNAmPAI1AdjAge	12	Diet	log2(Vegetables)	3	4864	-0.021557	-1.50197	0.133106	0.875803	0.0161985	0.682361	-0.0267474	0.115631									-0.0296773	0.414508
DNAmPAI1AdjAge	14	Diet	log(OMEGA3)	1	643	-0.0307583	-0.777768	0.436706	0.359811	-0.0307583	0.436706
DNAmPAI1AdjAge	15	Diet	log(VitaminA)	1	651	-0.0195097	-0.49632	0.619669	0.207841	-0.0195097	0.619669
DNAmPAI1AdjAge	16	Diet	log(VitaminC)	2	1409	-0.0749244	-2.81182	0.00492615	2.30749	-0.0373389	0.341797											-0.106969	0.00318384
DNAmPAI1AdjAge	17	Diet	log(VitaminB6)	2	1407	-0.0457426	-1.71279	0.086752	1.06172	-0.027474	0.484961											-0.0613561	0.0916093
DNAmPAI1AdjAge	18	Diet	log(VitaminE)	2	1397	-0.0612751	-2.29084	0.0219726	1.65812	-0.0138875	0.726235											-0.100803	0.00539072
DNAmPAI1AdjAge	19	Diet	log(Selenium)	2	1401	-0.0246179	-0.919492	0.357838	0.446313	-0.00749808	0.849667											-0.0390879	0.282478
DNAmPAI1AdjAge	20	Diet	log(Iron)	1	633	-0.00318957	-0.0800388	0.936206	0.0286284	-0.00318957	0.936206
DNAmPAI1AdjAge	21	Diet	log(Zinc)	2	1404	0.00319528	0.119651	0.904759	0.0434669	0.0745736	0.0582697											-0.0575722	0.113092
DNAmPAI1AdjAge	22	Diet	log(Calcium)	2	1407	-0.0786456	-2.94877	0.00319037	2.49616	-0.0629257	0.109511											-0.0920426	0.0112204
DNAmPAI1AdjAge	23	Diet	log(FolicAcid)	2	1407	-0.0928202	-3.48335	0.000495178	3.30524	-0.0812505	0.0386282											-0.102677	0.0046335
DNAmPAI1AdjAge	24	Diet	log(VitaminD)	2	1397	-0.0577157	-2.15392	0.0312464	1.5052	-0.0821064	0.0380824											-0.0370953	0.308167
DNAmPAI1AdjAge	25	Diet	log(Copper)	1	643	-0.0488531	-1.23593	0.216483	0.664575	-0.0488531	0.216483
DNAmPAI1AdjAge	26	Diet	log(BrewYeast)	1	643	-0.0589511	-1.49312	0.135405	0.868365	-0.0589511	0.135405
DNAmPAI1AdjAge	27	Diet	log(BetaCaroteneSup)	1	645	0.0137376	0.348033	0.727816	0.137979	0.0137376	0.727816
DNAmPAI1AdjAge	28	Diet	log(Magnesium)	1	641	0.0604873	1.52911	0.126236	0.898816	0.0604873	0.126236
DNAmPAI1AdjAge	29	Dietary Biomarkers	Retinol	1	2053	0.178955	8.18623	2.69534e-16	15.5694			0.178955	2.69534e-16
DNAmPAI1AdjAge	30	Dietary Biomarkers	Mean carotenoids	1	2052	-0.255283	-11.8379	2.48644e-32	31.6044			-0.255283	2.48644e-32
DNAmPAI1AdjAge	31	Dietary Biomarkers	Lycopene	1	2053	-0.0784526	-3.56169	0.000368477	3.43359			-0.0784526	0.000368477
DNAmPAI1AdjAge	32	Dietary Biomarkers	log2(alpha-Carotene)	1	2053	-0.247238	-11.4359	2.76629e-30	29.5581			-0.247238	2.76629e-30
DNAmPAI1AdjAge	33	Dietary Biomarkers	log2(beta-Carotene)	1	2052	-0.249296	-11.5293	9.38675e-31	30.0275			-0.249296	9.38675e-31
DNAmPAI1AdjAge	34	Dietary Biomarkers	log2(Lutein+Zeaxanthin)	1	2053	-0.170116	-7.78276	7.09609e-15	14.149			-0.170116	7.09609e-15
DNAmPAI1AdjAge	35	Dietary Biomarkers	log2(beta-Cryptoxanthin)	1	2053	-0.179289	-8.21738	2.08004e-16	15.6819			-0.179289	2.08004e-16
DNAmPAI1AdjAge	36	Dietary Biomarkers	log2(alpha-Tocopherol)	1	2053	0.0712003	3.22711	0.00125048	2.90292			0.0712003	0.00125048
DNAmPAI1AdjAge	37	Dietary Biomarkers	log2(gamma-Tocopherol)	1	2053	0.160117	7.30894	2.69255e-13	12.5698			0.160117	2.69255e-13
DNAmPAI1AdjAge	38	Measurements	log(A1C)	1	711	0.166887	4.47939	7.4857e-06	5.12577	0.166887	7.4857e-06
DNAmPAI1AdjAge	39	Measurements	log2(C-reactive protein)	8	11281	0.2521	27.3586	8.54422e-165	164.068	0.334707	2.54034e-20	0.305316	2.28814e-60	0.25324	3.27629e-27	0.181001	5.98497e-12	0.227901	8.28582e-11	0.0985351	0.201927	0.233638	9.51842e-32	0.234809	5.12093e-18
DNAmPAI1AdjAge	40	Measurements	log2(Insulin)	3	5912	0.226827	17.9064	1.05033e-71	70.9787			0.341978	8.14257e-108			-0.0393509	0.297559							0.0134911	0.61745
DNAmPAI1AdjAge	41	Measurements	log2(Glucose)	5	7392	0.201497	17.6444	1.1235e-69	68.9494	0.252417	6.74391e-12	0.261067	6.59344e-63			0.144391	4.50624e-08	0.275041	5.91688e-14					-0.200158	4.93429e-07
DNAmPAI1AdjAge	42	Measurements	log2(Triglyceride)	6	9847	0.33796	34.8925	9.64625e-267	266.016	0.414384	9.47461e-32	0.358777	1.7971e-122	0.334641	1.12202e-44	0.278047	6.4046e-27	0.379719	5.8714e-29					0.274425	4.13073e-25
DNAmPAI1AdjAge	43	Measurements	Total cholesterol	8	13002	-0.0264927	-3.02362	0.0024977	2.60246	-0.0170956	0.649619	0.0411421	0.00983695	0.0170101	0.493122	0.011385	0.668487	-0.00925245	0.795864	-0.153137	0.00151548	-0.133126	2.70088e-12	-0.0716577	0.00792534
DNAmPAI1AdjAge	44	Measurements	LDL cholesterol	4	7688	-0.025223	-2.21062	0.0270621	1.56764			-0.0203294	0.20573	-0.0412474	0.0977162	-0.0155132	0.559891	-0.0339667	0.341981
DNAmPAI1AdjAge	45	Measurements	HDL cholesterol	6	9844	-0.172756	-17.3013	4.59584e-67	66.3376	-0.200744	6.40661e-08	-0.199305	1.02979e-36	-0.111706	6.14075e-06	-0.164534	4.20285e-10	-0.228071	9.07609e-11					-0.129292	1.5624e-06
DNAmPAI1AdjAge	46	Measurements	log2(Creatinine)	3	4770	-0.0327647	-2.26217	0.0236867	1.6255	-0.00357457	0.924432	-0.0533533	0.00604481			-0.00876702	0.741554
DNAmPAI1AdjAge	47	Measurements	log2(IL6)	3	3185	0.119178	6.74969	1.48161e-11	10.8293							0.12672	1.62856e-06	0.168653	1.98577e-06					0.0680854	0.0330757
DNAmPAI1AdjAge	48	Measurements	log2(TNFA)	3	2621	0.0733829	3.75727	0.000171774	3.76504							0.0582591	0.0293145	0.0923754	0.154143					0.0902888	0.0046533
DNAmPAI1AdjAge	49	Measurements	log2(Urine Creatinine)	3	1793	0.0802765	3.39635	0.000682907	3.16564	0.0920477	0.0148529			0.0371354	0.464756	0.0923467	0.0144074
DNAmPAI1AdjAge	50	Measurements	FEV1	5	5836	-0.157141	-12.107	9.70124e-34	33.0132	-0.153886	0.000168025							-0.0909196	0.0271558	-0.0170085	0.656354	-0.209551	4.05412e-29	-0.146549	3.78104e-07
DNAmPAI1AdjAge	52	Measurements	Systolic blood pressure	6	11980	0.0581108	6.37072	1.88143e-10	9.72551	0.082977	0.0266319	0.106584	1.6906e-11	0.0646171	0.00698386	0.0956551	0.000321421					0.00548709	0.771824	-0.0358791	0.184755
DNAmPAI1AdjAge	53	Measurements	Diastolic blood pressure	6	11980	0.0175857	1.92534	0.0541862	1.26611	0.0560141	0.136004	0.0158432	0.318816	0.0489076	0.0412928	0.101702	0.000130953					0.00179814	0.924328	-0.0914358	0.000709474
DNAmPAI1AdjAge	54	Measurements	log2(Waist / hip ratio)	3	5887	0.272534	21.4493	4.64037e-102	101.333	0.365787	3.86771e-24	0.269497	2.88062e-65											0.23065	5.32456e-18
DNAmPAI1AdjAge	55	Measurements	BMI	8	13420	0.249459	29.5228	1.46891e-191	190.833	0.344136	1.61182e-21	0.27594	1.30247e-70	0.236398	8.80335e-24	0.195034	1.58013e-13	0.304931	1.37132e-18	0.129082	0.000680986	0.260625	4.58509e-45	0.195285	2.87957e-13
DNAmPAI1AdjAge	56	Measurements	MMSE	6	7017	-0.0483688	-4.0488	5.14804e-05	4.28836	-0.0574761	0.126298	-0.0474456	0.171032			-0.0300693	0.257271	-0.0321979	0.445891	0.0021228	0.955652	-0.0712261	0.000163667
DNAmPAI1AdjAge	57	Measurements	Telomere length	3	2193	-0.0877325	-4.11481	3.87501e-05	4.41173	-0.160808	0.0117844	-0.142554	4.1973e-05											-0.0317489	0.286268
DNAmPAI1AdjAge	58	Life style	Education	8	13312	-0.0419461	-4.83974	1.3001e-06	5.88602	-0.126815	0.00207867	-0.0479917	0.00262676	0.00545188	0.819995	-0.0434147	0.102349	-0.0889405	0.0128464	0.0228797	0.548095	-0.041688	0.027482	-0.0531589	0.0494103
DNAmPAI1AdjAge	59	Life style	Income	3	6687	-0.054784	-4.48121	7.42206e-06	5.12948			-0.0590739	0.000250032	-0.049441	0.0552268									-0.0484944	0.0755312
DNAmPAI1AdjAge	60	Life style	Hand grip	5	5962	-0.0485587	-3.74897	0.000177563	3.75065	-0.0856307	0.0475023					-0.0179141	0.5178	-0.00990356	0.793613	0.0167569	0.675477	-0.0799308	2.34506e-05
DNAmPAI1AdjAge	61	Life style	log2(1+Exercise)	4	7278	-0.116336	-9.96479	2.17337e-23	22.6629			-0.109467	2.11262e-11	-0.109893	4.11427e-06			-0.135975	0.00034015					-0.136823	3.91198e-06
DNAmPAI1AdjAge	62	Life style	Current smoker	6	10247	0.0830295	8.41678	3.86976e-17	16.4123	0.117417	0.00170421	0.0635803	7.03076e-05					0.089461	0.0125241	0.0387476	0.309408	0.100239	1.0647e-07	0.10381	0.000121217
DNAmPAI1AdjAge	63	Life style	log2(1+Alcohol)	5	8050	0.0290935	2.61232	0.00899301	2.04609	0.159095	2.00725e-05	-0.0256762	0.130836	0.0610149	0.0121312	0.0100357	0.704434					0.120219	0.000898293
