# Supplementary material for: DNA methylation GrimAge version 2
Source: Aging (Albany NY). 2022 Dec 14;14(23):9484–549. doi: 10.18632/aging.204434 (PMC9792204; doi:10.18632/aging.204434)
Supplement: Supplementary Table 2.13 [file aging-14-204434-s015.xlsx]

## Sheet: Table S2.13
Supplementary Table 2.13. DNAmTIMP1AdjAge:Diet, clinically relevant measurements, and life style factors.
AgeAccel	order	category	var	NumData	n	Meta.bicor	Meta.bicor.Z	Meta.P	Meta.log10P	bicor.FHS	p.FHS	bicor.WHI	p.WHI	bicor.JHS	p.JHS	bicor.InChianti	p.InChianti	bicor.BLSA	p.BLSA	bicor.LBC21	p.LBC21	bicor.LBC36	p.LBC36	bicor.NAS	p.NAS
DNAmTIMP1AdjAge	1	Diet	log2(Total energy)	2	4221	0.01077	0.699062	0.484513	0.314694			0.0115466	0.497129									0.0072123	0.842918
DNAmTIMP1AdjAge	2	Diet	Carbohydrate	2	4222	-0.0271285	-1.76219	0.078037	1.1077			-0.0346444	0.0415594									0.00712527	0.844351
DNAmTIMP1AdjAge	3	Diet	Protein	2	4221	6.83233e-05	0.00443434	0.996462	0.00153929			0.00173781	0.918616									-0.00757357	0.835123
DNAmTIMP1AdjAge	4	Diet	Fat	2	4221	0.0200974	1.3052	0.191823	0.717099			0.0291365	0.0864636									-0.0213112	0.557975
DNAmTIMP1AdjAge	5	Diet	log2(1+Red meat)	3	4873	0.0171701	1.1977	0.231032	0.636327	-0.0641642	0.102182	0.0412531	0.0152255									-0.0232916	0.521937
DNAmTIMP1AdjAge	6	Diet	log2(1+Poultry)	3	4832	-0.00723029	-0.502176	0.615544	0.210741	0.0357069	0.363395	-0.00478659	0.778314									-0.0578264	0.121541
DNAmTIMP1AdjAge	7	Diet	log2(1+Fish)	3	4873	-0.0227886	-1.58936	0.11198	0.950861	-0.0641642	0.102182	-0.0124384	0.464428									-0.0346396	0.340861
DNAmTIMP1AdjAge	8	Diet	log2(1+Dairy)	3	4868	-0.00857506	-0.597487	0.550182	0.259493	-0.0224692	0.569035	-0.00734204	0.665962									-0.00240324	0.947337
DNAmTIMP1AdjAge	9	Diet	log2(1+Whole grains)	2	4108	-0.0116317	-0.744896	0.456335	0.340717	0.0257547	0.513742	-0.0185818	0.274507
DNAmTIMP1AdjAge	10	Diet	log2(1+Nuts)	1	3463	-0.0322612	-1.89772	0.0577324	1.23858			-0.0322612	0.0577324
DNAmTIMP1AdjAge	11	Diet	log2(Fruits)	3	4864	-0.0271094	-1.88879	0.0589194	1.22974	0.006979	0.860011	-0.0341818	0.0443509									-0.0235276	0.517883
DNAmTIMP1AdjAge	12	Diet	log2(Vegetables)	3	4864	-0.0185526	-1.29284	0.196067	0.707596	0.0377405	0.33953	-0.0171644	0.312814									-0.0724716	0.0460615
DNAmTIMP1AdjAge	14	Diet	log(OMEGA3)	1	643	0.01277	0.323069	0.746643	0.126887	0.01277	0.746643
DNAmTIMP1AdjAge	15	Diet	log(VitaminA)	1	651	-0.0396794	-1.01001	0.312489	0.505165	-0.0396794	0.312489
DNAmTIMP1AdjAge	16	Diet	log(VitaminC)	2	1409	-0.0206796	-0.774229	0.438795	0.357738	-0.011339	0.772992											-0.0286912	0.430633
DNAmTIMP1AdjAge	17	Diet	log(VitaminB6)	2	1407	0.0234219	0.876512	0.380752	0.419358	0.0255372	0.516304											0.0216109	0.552775
DNAmTIMP1AdjAge	18	Diet	log(VitaminE)	2	1397	0.00485771	0.181173	0.856232	0.0674087	0.0205392	0.604422											-0.00835921	0.818357
DNAmTIMP1AdjAge	19	Diet	log(Selenium)	2	1401	-0.0209365	-0.782117	0.434146	0.362364	0.000685305	0.986173											-0.0392248	0.280797
DNAmTIMP1AdjAge	20	Diet	log(Iron)	1	633	0.000212205	0.00532299	0.995753	0.00184843	0.000212205	0.995753
DNAmTIMP1AdjAge	21	Diet	log(Zinc)	2	1404	0.00436788	0.163277	0.8703	0.0603308	0.00602231	0.878656											0.00295897	0.935214
DNAmTIMP1AdjAge	22	Diet	log(Calcium)	2	1407	-0.00366679	-0.137222	0.890855	0.0501928	-0.029773	0.449304											0.0186696	0.608023
DNAmTIMP1AdjAge	23	Diet	log(FolicAcid)	2	1407	0.00392443	0.146808	0.883284	0.0538997	0.0145857	0.711036											-0.0051938	0.886571
DNAmTIMP1AdjAge	24	Diet	log(VitaminD)	2	1397	-0.0252961	-0.943714	0.345316	0.461783	-0.0153516	0.698525											-0.0336772	0.354696
DNAmTIMP1AdjAge	25	Diet	log(Copper)	1	643	0.0172861	0.437031	0.662089	0.179084	0.0172861	0.662089
DNAmTIMP1AdjAge	26	Diet	log(BrewYeast)	1	643	-0.008785	-0.222519	0.82391	0.0841203	-0.008785	0.82391
DNAmTIMP1AdjAge	27	Diet	log(BetaCaroteneSup)	1	645	0.0541471	1.37332	0.169653	0.770437	0.0541471	0.169653
DNAmTIMP1AdjAge	28	Diet	log(Magnesium)	1	641	0.0986113	2.50115	0.0123791	1.90731	0.0986113	0.0123791
DNAmTIMP1AdjAge	29	Dietary Biomarkers	Retinol	1	2053	-0.0186207	-0.843538	0.398928	0.399106			-0.0186207	0.398928
DNAmTIMP1AdjAge	30	Dietary Biomarkers	Mean carotenoids	1	2052	-0.194788	-8.93765	3.97529e-19	18.4006			-0.194788	3.97529e-19
DNAmTIMP1AdjAge	31	Dietary Biomarkers	Lycopene	1	2053	-0.0866016	-3.9316	8.43819e-05	4.07375			-0.0866016	8.43819e-05
DNAmTIMP1AdjAge	32	Dietary Biomarkers	log2(alpha-Carotene)	1	2053	-0.173282	-7.92438	2.29292e-15	14.6396			-0.173282	2.29292e-15
DNAmTIMP1AdjAge	33	Dietary Biomarkers	log2(beta-Carotene)	1	2052	-0.170677	-7.79987	6.19715e-15	14.2078			-0.170677	6.19715e-15
DNAmTIMP1AdjAge	34	Dietary Biomarkers	log2(Lutein+Zeaxanthin)	1	2053	-0.147584	-6.72983	1.69859e-11	10.7699			-0.147584	1.69859e-11
DNAmTIMP1AdjAge	35	Dietary Biomarkers	log2(beta-Cryptoxanthin)	1	2053	-0.137931	-6.2894	3.18698e-10	9.49662			-0.137931	3.18698e-10
DNAmTIMP1AdjAge	36	Dietary Biomarkers	log2(alpha-Tocopherol)	1	2053	-0.0540203	-2.44901	0.0143251	1.8439			-0.0540203	0.0143251
DNAmTIMP1AdjAge	37	Dietary Biomarkers	log2(gamma-Tocopherol)	1	2053	0.0826294	3.74709	0.000178895	3.7474			0.0826294	0.000178895
DNAmTIMP1AdjAge	38	Measurements	log(A1C)	1	711	0.137686	3.6844	0.000229243	3.6397	0.137686	0.000229243
DNAmTIMP1AdjAge	39	Measurements	log2(C-reactive protein)	8	11281	0.251607	27.2904	5.52023e-164	163.258	0.374887	1.28658e-25	0.260125	1.75796e-43	0.264914	1.00151e-29	0.236307	1.40542e-19	0.246413	1.95094e-12	0.0738544	0.339305	0.223518	4.14379e-29	0.238894	1.30145e-18
DNAmTIMP1AdjAge	40	Measurements	log2(Insulin)	3	5912	0.119044	9.2034	3.46807e-20	19.4599			0.162995	2.42751e-24			-0.0122661	0.745274							0.0613218	0.0230691
DNAmTIMP1AdjAge	41	Measurements	log2(Glucose)	5	7392	0.0784015	6.75191	1.45916e-11	10.8359	0.137196	0.000243583	0.0913782	9.31547e-09			0.037967	0.152584	0.113398	0.00245984					-0.0198892	0.620821
DNAmTIMP1AdjAge	42	Measurements	log2(Triglyceride)	6	9847	0.0583708	5.79554	6.81016e-09	8.16684	0.136017	0.000273695	0.0697069	1.20221e-05	0.0406011	0.101572	-0.00801889	0.762829	0.0830328	0.0200351					0.06077	0.0244389
DNAmTIMP1AdjAge	43	Measurements	Total cholesterol	8	13002	-0.0913916	-10.448	1.4963e-25	24.825	-0.0784068	0.0368236	-0.0386401	0.0153667	-0.0531173	0.0321311	-0.103335	9.49069e-05	-0.0942292	0.00834305	-0.213129	8.92787e-06	-0.11901	4.28474e-10	-0.184744	5.3402e-12
DNAmTIMP1AdjAge	44	Measurements	LDL cholesterol	4	7688	-0.0524675	-4.6012	4.20059e-06	5.37669			-0.0363374	0.0237065	-0.0430876	0.0834659	-0.0908881	0.000611392	-0.0819523	0.0220089
DNAmTIMP1AdjAge	45	Measurements	HDL cholesterol	6	9844	-0.101533	-10.0998	5.53324e-24	23.257	-0.18227	9.85361e-07	-0.0923812	6.45828e-09	-0.0553147	0.0256164	-0.0877336	0.000936737	-0.110928	0.00187178					-0.148606	3.23631e-08
DNAmTIMP1AdjAge	46	Measurements	log2(Creatinine)	3	4770	0.0413061	2.85223	0.00434143	2.36237	0.0107786	0.77473	0.0180809	0.353014			0.0994347	0.000174808
DNAmTIMP1AdjAge	47	Measurements	log2(IL6)	3	3185	0.132877	7.54477	4.53085e-14	13.3438							0.173142	4.58729e-11	0.193973	4.12544e-08					0.0234294	0.463791
DNAmTIMP1AdjAge	48	Measurements	log2(TNFA)	3	2621	0.0934573	4.80064	1.58156e-06	5.80092							0.152151	9.90248e-09	-0.073296	0.257593					0.0490633	0.124619
DNAmTIMP1AdjAge	49	Measurements	log2(Urine Creatinine)	3	1793	0.0294232	1.24385	0.213556	0.670488	0.00215262	0.954588			0.0612813	0.227067	0.0390214	0.302317
DNAmTIMP1AdjAge	50	Measurements	FEV1	5	5836	-0.145577	-11.1925	4.43709e-29	28.3529	-0.177042	1.44984e-05							-0.0512224	0.214255	-0.0829163	0.0295306	-0.174917	1.35758e-20	-0.142885	7.37029e-07
DNAmTIMP1AdjAge	52	Measurements	Systolic blood pressure	6	11980	0.0199	2.17925	0.0293133	1.53293	0.0697051	0.0632568	0.0810751	3.237e-07	0.0499717	0.0370411	-0.0127617	0.632132					-0.0478529	0.0114196	-0.0498048	0.0655391
DNAmTIMP1AdjAge	53	Measurements	Diastolic blood pressure	6	11980	-0.0236488	-2.5887	0.00963397	2.01619	-0.0175625	0.640684	0.00135388	0.932152	-0.0105586	0.659652	0.00559024	0.834069					-0.0249813	0.186743	-0.14158	1.45404e-07
DNAmTIMP1AdjAge	54	Measurements	log2(Waist / hip ratio)	3	5887	0.138035	10.6636	1.50703e-26	25.8219	0.267895	4.02031e-13	0.133707	9.75782e-17											0.0808821	0.0027363
DNAmTIMP1AdjAge	55	Measurements	BMI	8	13420	0.125532	14.6312	1.77546e-48	47.7507	0.24937	1.34395e-11	0.178716	1.00553e-29	0.156665	3.61659e-11	0.0609311	0.0226449	0.132428	0.000199621	0.0287655	0.451516	0.0847763	7.19732e-06	0.0565955	0.0360059
DNAmTIMP1AdjAge	56	Measurements	MMSE	6	7017	-0.0649173	-5.44362	5.22095e-08	7.28225	-0.10967	0.00342505	-0.0504089	0.146055			-0.0803584	0.00232482	-0.113954	0.00657758	-0.037333	0.32704	-0.0467134	0.0135443
DNAmTIMP1AdjAge	57	Measurements	Telomere length	3	2193	-0.0458938	-2.15016	0.0315424	1.50111	-0.0448915	0.485269	-0.136618	8.70435e-05											0.02023	0.49691
DNAmTIMP1AdjAge	58	Life style	Education	8	13312	-0.0577405	-6.66558	2.63628e-11	10.579	-0.0274405	0.507197	-0.0487832	0.00222982	-0.0600547	0.0121096	-0.0196737	0.457898	-0.0692117	0.0531533	-0.106335	0.00517321	-0.0802589	2.13408e-05	-0.0557947	0.0391492
DNAmTIMP1AdjAge	59	Life style	Income	3	6687	-0.0827883	-6.78247	1.18142e-11	10.9276			-0.0738461	4.63157e-06	-0.131007	3.28607e-07									-0.0538989	0.0482043
DNAmTIMP1AdjAge	60	Life style	Hand grip	5	5962	-0.059318	-4.58179	4.61007e-06	5.33629	-0.0696133	0.107443					-0.0473846	0.0864717	-0.0513363	0.173775	-0.0624628	0.117734	-0.0642387	0.000685968
DNAmTIMP1AdjAge	61	Life style	log2(1+Exercise)	4	7278	-0.0985161	-8.42519	3.60163e-17	16.4435			-0.0842847	2.69576e-07	-0.100893	2.38448e-05			-0.14479	0.00013065					-0.113048	0.000140004
DNAmTIMP1AdjAge	62	Life style	Current smoker	6	10247	0.0804855	8.16041	3.33901e-16	15.4764	0.0777745	0.0382494	0.0867332	5.69477e-08					-0.0199136	0.578955	0.0980074	0.00993638	0.11805	3.64404e-10	0.0346057	0.201172
DNAmTIMP1AdjAge	63	Life style	log2(1+Alcohol)	5	8050	-0.0184948	-1.65781	0.0973566	1.01163	0.0333995	0.374577	-0.027627	0.104156	-0.0293532	0.228022	-0.00404765	0.878497					-0.0282638	0.437365
