# Supplementary material for: DNA methylation GrimAge version 2
Source: Aging (Albany NY). 2022 Dec 14;14(23):9484–549. doi: 10.18632/aging.204434 (PMC9792204; doi:10.18632/aging.204434)
Supplement: Supplementary Table 4.1 [file aging-14-204434-s017.xlsx]

## Sheet: Table S4.1
Supplementary Table 4.1. Association with blood cell composition.
n	data	var	cell	Correlation	SE	P	log10P
711	FHS	AgeAccelGrim2	Bcell	-0.273622	0.0361226	1.12494e-13	12.9489
1746	JHS	AgeAccelGrim2	Bcell	-0.26857	0.0230659	3.14536e-30	29.5023
1430	InChianti	AgeAccelGrim2	Bcell	-0.228942	0.02576	1.8405e-18	17.7351
788	BLSA	AgeAccelGrim2	Bcell	-0.271567	0.0343284	8.66883e-15	14.062
692	LBC21	AgeAccelGrim2	Bcell	-0.0724088	0.0379694	0.0569317	1.24465
2796	LBC36	AgeAccelGrim2	Bcell	-0.207901	0.0185051	1.1224e-28	27.9499
1402	NAS	AgeAccelGrim2	Bcell	-0.0918985	0.026893	0.000651239	3.18626
998	WHI BA23 White	AgeAccelGrim2	Bcell	-0.257078	0.0306213	1.58062e-16	15.8012
676	WHI BA23 AfricanA	AgeAccelGrim2	Bcell	-0.219316	0.0375808	8.3138e-09	8.0802
433	WHI BA23 Hispanic	AgeAccelGrim2	Bcell	-0.310674	0.0457848	3.83556e-11	10.4162
11672	Meta	AgeAccelGrim2	Bcell	-0.216498	0.00903521	6.98862e-127	126.156
711	FHS	AgeAccelGrim2	CD4T	-0.278121	0.0360741	4.27153e-14	13.3694
1746	JHS	AgeAccelGrim2	CD4T	-0.276794	0.0230101	4.46586e-32	31.3501
1430	InChianti	AgeAccelGrim2	CD4T	-0.277735	0.0254217	9.67015e-27	26.0146
788	BLSA	AgeAccelGrim2	CD4T	-0.262105	0.0344218	7.60064e-14	13.1191
692	LBC21	AgeAccelGrim2	CD4T	-0.245462	0.0369047	5.91703e-11	10.2279
2796	LBC36	AgeAccelGrim2	CD4T	-0.267806	0.0182275	3.94817e-47	46.4036
1402	NAS	AgeAccelGrim2	CD4T	-0.176211	0.0265847	4.86926e-11	10.3125
998	WHI BA23 White	AgeAccelGrim2	CD4T	-0.253993	0.0306471	3.70395e-16	15.4313
676	WHI BA23 AfricanA	AgeAccelGrim2	CD4T	-0.299347	0.0367523	1.84017e-15	14.7351
433	WHI BA23 Hispanic	AgeAccelGrim2	CD4T	-0.382475	0.0445059	1.56263e-16	15.8061
11672	Meta	AgeAccelGrim2	CD4T	-0.26429	0.00893805	3.73894e-192	191.427
711	FHS	AgeAccelGrim2	CD4.naive	-0.0753938	0.0374489	0.0444664	1.35197
1746	JHS	AgeAccelGrim2	CD4.naive	-0.164958	0.0236176	4.05036e-12	11.3925
1430	InChianti	AgeAccelGrim2	CD4.naive	-0.110528	0.0263007	2.80373e-05	4.55226
788	BLSA	AgeAccelGrim2	CD4.naive	-0.165897	0.0351746	2.84037e-06	5.54662
692	LBC21	AgeAccelGrim2	CD4.naive	-0.0809099	0.0379445	0.0333331	1.47712
2796	LBC36	AgeAccelGrim2	CD4.naive	-0.0626823	0.0188813	0.000912363	3.03983
1402	NAS	AgeAccelGrim2	CD4.naive	0.0528156	0.0269696	0.050393	1.29763
998	WHI BA23 White	AgeAccelGrim2	CD4.naive	-0.108058	0.0315007	0.000627594	3.20232
676	WHI BA23 AfricanA	AgeAccelGrim2	CD4.naive	-0.23131	0.0374739	1.16014e-09	8.93549
433	WHI BA23 Hispanic	AgeAccelGrim2	CD4.naive	-0.232185	0.0468519	1.03746e-06	5.98403
11672	Meta	AgeAccelGrim2	CD4.naive	-0.100102	0.00920201	1.46338e-27	26.8346
711	FHS	AgeAccelGrim2	CD8.naive	-0.166237	0.0370332	8.35542e-06	5.07803
1746	JHS	AgeAccelGrim2	CD8.naive	-0.24233	0.0232319	9.42055e-25	24.0259
1430	InChianti	AgeAccelGrim2	CD8.naive	-0.234819	0.0257229	2.29695e-19	18.6388
788	BLSA	AgeAccelGrim2	CD8.naive	-0.256926	0.0344715	2.40489e-13	12.6189
692	LBC21	AgeAccelGrim2	CD8.naive	-0.173651	0.037491	4.33276e-06	5.36323
2796	LBC36	AgeAccelGrim2	CD8.naive	-0.135091	0.0187451	7.34129e-13	12.1342
1402	NAS	AgeAccelGrim2	CD8.naive	-0.258288	0.0260909	2.30349e-22	21.6376
998	WHI BA23 White	AgeAccelGrim2	CD8.naive	-0.246153	0.0307113	3.06584e-15	14.5135
676	WHI BA23 AfricanA	AgeAccelGrim2	CD8.naive	-0.399122	0.0353176	3.07149e-27	26.5127
433	WHI BA23 Hispanic	AgeAccelGrim2	CD8.naive	-0.288195	0.0461246	9.98084e-10	9.00083
11672	Meta	AgeAccelGrim2	CD8.naive	-0.223307	0.00901918	2.47268e-135	134.607
711	FHS	AgeAccelGrim2	CD8T	-0.105664	0.0373455	0.00479593	2.31913
1746	JHS	AgeAccelGrim2	CD8T	-0.153183	0.023663	1.24121e-10	9.90615
1430	InChianti	AgeAccelGrim2	CD8T	-0.0743459	0.0263896	0.00491047	2.30888
788	BLSA	AgeAccelGrim2	CD8T	-0.150464	0.0352627	2.22335e-05	4.65299
692	LBC21	AgeAccelGrim2	CD8T	0.0774344	0.037955	0.0417145	1.37971
2796	LBC36	AgeAccelGrim2	CD8T	-0.0449585	0.0188994	0.0174344	1.75859
1402	NAS	AgeAccelGrim2	CD8T	0.00925089	0.0270062	0.731991	0.135494
998	WHI BA23 White	AgeAccelGrim2	CD8T	-0.0479079	0.0316498	0.130423	0.884646
676	WHI BA23 AfricanA	AgeAccelGrim2	CD8T	-0.1022	0.0383169	0.0078314	2.10616
433	WHI BA23 Hispanic	AgeAccelGrim2	CD8T	-0.0588209	0.0480849	0.221895	0.653852
11672	Meta	AgeAccelGrim2	CD8T	-0.0665024	0.00923715	6.04588e-13	12.2185
711	FHS	AgeAccelGrim2	CD8.ex	0.248317	0.0363795	1.87957e-11	10.7259
1746	JHS	AgeAccelGrim2	CD8.ex	0.176139	0.0235713	1.23712e-13	12.9076
1430	InChianti	AgeAccelGrim2	CD8.ex	0.176893	0.0260455	1.62136e-11	10.7901
788	BLSA	AgeAccelGrim2	CD8.ex	0.211192	0.0348643	2.14152e-09	8.66928
692	LBC21	AgeAccelGrim2	CD8.ex	0.156612	0.0375996	3.50448e-05	4.45538
2796	LBC36	AgeAccelGrim2	CD8.ex	0.226368	0.0184274	8.07441e-34	33.0929
1402	NAS	AgeAccelGrim2	CD8.ex	0.162201	0.0266497	1.49616e-09	8.82502
998	WHI BA23 White	AgeAccelGrim2	CD8.ex	0.176097	0.031191	2.14417e-08	7.66874
676	WHI BA23 AfricanA	AgeAccelGrim2	CD8.ex	0.292882	0.0368295	7.73132e-15	14.1117
433	WHI BA23 Hispanic	AgeAccelGrim2	CD8.ex	0.221216	0.0469749	3.35813e-06	5.4739
11672	Meta	AgeAccelGrim2	CD8.ex	0.201316	0.00907935	6.26376e-109	108.203
711	FHS	AgeAccelGrim2	NK	-0.258345	0.0362809	2.64067e-12	11.5783
1746	JHS	AgeAccelGrim2	NK	-0.150577	0.0236726	2.55785e-10	9.59213
1430	InChianti	AgeAccelGrim2	NK	-0.169509	0.0260799	1.10975e-10	9.95478
788	BLSA	AgeAccelGrim2	NK	-0.107248	0.0354631	0.00257384	2.58942
692	LBC21	AgeAccelGrim2	NK	-0.142114	0.037683	0.000176323	3.75369
2796	LBC36	AgeAccelGrim2	NK	-0.130684	0.0187563	4.00804e-12	11.3971
1402	NAS	AgeAccelGrim2	NK	-0.183568	0.0265484	7.17854e-12	11.144
998	WHI BA23 White	AgeAccelGrim2	NK	-0.211091	0.0309722	1.62473e-11	10.7892
676	WHI BA23 AfricanA	AgeAccelGrim2	NK	-0.103744	0.0383107	0.00694142	2.15855
433	WHI BA23 Hispanic	AgeAccelGrim2	NK	-0.142306	0.0476781	0.00299985	2.5229
11672	Meta	AgeAccelGrim2	NK	-0.157872	0.00915207	1.12186e-66	65.9501
711	FHS	AgeAccelGrim2	PB	0.338378	0.0353404	1.66277e-20	19.7792
1746	JHS	AgeAccelGrim2	PB	0.267446	0.0230734	5.563e-30	29.2547
1430	InChianti	AgeAccelGrim2	PB	0.296329	0.0252743	2.24012e-30	29.6497
788	BLSA	AgeAccelGrim2	PB	0.264577	0.0343977	4.34662e-14	13.3618
692	LBC21	AgeAccelGrim2	PB	0.219175	0.0371437	5.67232e-09	8.24624
2796	LBC36	AgeAccelGrim2	PB	0.271826	0.0182062	1.48076e-48	47.8295
1402	NAS	AgeAccelGrim2	PB	0.0846995	0.0269103	0.00168232	2.77409
998	WHI BA23 White	AgeAccelGrim2	PB	0.295198	0.0302741	1.61787e-21	20.7911
676	WHI BA23 AfricanA	AgeAccelGrim2	PB	0.266744	0.0371229	1.78086e-12	11.7494
433	WHI BA23 Hispanic	AgeAccelGrim2	PB	0.290106	0.0460968	7.64811e-10	9.11645
11672	Meta	AgeAccelGrim2	PB	0.256717	0.00894441	3.66684e-181	180.436
711	FHS	AgeAccelGrim2	Mono	0.0721302	0.037458	0.05455	1.26321
1746	JHS	AgeAccelGrim2	Mono	0.145831	0.0236897	9.2432e-10	9.03418
1430	InChianti	AgeAccelGrim2	Mono	0.153884	0.0261476	4.94695e-09	8.30566
788	BLSA	AgeAccelGrim2	Mono	0.212527	0.034854	1.68666e-09	8.77297
692	LBC21	AgeAccelGrim2	Mono	0.11962	0.037796	0.00161968	2.79057
2796	LBC36	AgeAccelGrim2	Mono	0.07756	0.0188615	4.03431e-05	4.39423
1402	NAS	AgeAccelGrim2	Mono	0.0896643	0.0268985	0.000880712	3.05517
998	WHI BA23 White	AgeAccelGrim2	Mono	-0.017471	0.0316814	0.581443	0.235493
676	WHI BA23 AfricanA	AgeAccelGrim2	Mono	0.10941	0.0382873	0.00440031	2.35652
433	WHI BA23 Hispanic	AgeAccelGrim2	Mono	0.0767546	0.0480262	0.110735	0.955714
11672	Meta	AgeAccelGrim2	Mono	0.104151	0.00921141	1.2153e-29	28.9153
711	FHS	AgeAccelGrim2	Gran	0.391979	0.0345503	1.57311e-27	26.8032
1746	JHS	AgeAccelGrim2	Gran	0.335044	0.0225617	4.58682e-47	46.3385
1430	InChianti	AgeAccelGrim2	Gran	0.284599	0.0253685	4.73489e-28	27.3247
788	BLSA	AgeAccelGrim2	Gran	0.29039	0.0341318	8.90095e-17	16.0506
692	LBC21	AgeAccelGrim2	Gran	0.183805	0.0374208	1.12762e-06	5.94784
2796	LBC36	AgeAccelGrim2	Gran	0.281367	0.0181542	4.87621e-52	51.3119
1402	NAS	AgeAccelGrim2	Gran	0.158407	0.0266663	3.60072e-09	8.44361
998	WHI BA23 White	AgeAccelGrim2	Gran	0.339074	0.0298091	2.8438e-28	27.5461
676	WHI BA23 AfricanA	AgeAccelGrim2	Gran	0.301312	0.0367284	1.18099e-15	14.9278
433	WHI BA23 Hispanic	AgeAccelGrim2	Gran	0.369578	0.044758	1.84334e-15	14.7344
11672	Meta	AgeAccelGrim2	Gran	0.288595	0.00886137	1.1723e-232	231.931
711	FHS	AgeAccelGrim	Bcell	-0.275315	0.0361044	7.83092e-14	13.1062
1746	JHS	AgeAccelGrim	Bcell	-0.211305	0.023405	4.49587e-19	18.3472
1430	InChianti	AgeAccelGrim	Bcell	-0.196139	0.0259488	7.24305e-14	13.1401
788	BLSA	AgeAccelGrim	Bcell	-0.239688	0.0346291	9.2763e-12	11.0326
692	LBC21	AgeAccelGrim	Bcell	0.00268098	0.0380692	0.943877	0.0250847
2796	LBC36	AgeAccelGrim	Bcell	-0.186427	0.0185868	2.77107e-23	22.5574
1402	NAS	AgeAccelGrim	Bcell	-0.0556295	0.0266847	0.037278	1.42855
998	WHI BA23 White	AgeAccelGrim	Bcell	-0.175321	0.0311954	2.47694e-08	7.60608
676	WHI BA23 AfricanA	AgeAccelGrim	Bcell	-0.137127	0.0381547	0.0003494	3.45668
433	WHI BA23 Hispanic	AgeAccelGrim	Bcell	-0.228848	0.04689	1.49226e-06	5.82616
11672	Meta	AgeAccelGrim	Bcell	-0.172532	0.00910221	4.01593e-80	79.3962
711	FHS	AgeAccelGrim	CD4T	-0.275448	0.036103	7.6101e-14	13.1186
1746	JHS	AgeAccelGrim	CD4T	-0.221878	0.0233488	6.49039e-21	20.1877
1430	InChianti	AgeAccelGrim	CD4T	-0.223775	0.0257917	1.09451e-17	16.9608
788	BLSA	AgeAccelGrim	CD4T	-0.215125	0.0348337	1.05514e-09	8.97669
692	LBC21	AgeAccelGrim	CD4T	-0.203939	0.0372693	6.23009e-08	7.20551
2796	LBC36	AgeAccelGrim	CD4T	-0.242318	0.0183547	1.19795e-38	37.9216
1402	NAS	AgeAccelGrim	CD4T	-0.1378	0.0264712	2.22122e-07	6.65341
998	WHI BA23 White	AgeAccelGrim	CD4T	-0.177684	0.031182	1.59311e-08	7.79775
676	WHI BA23 AfricanA	AgeAccelGrim	CD4T	-0.203403	0.0377133	9.57854e-08	7.0187
433	WHI BA23 Hispanic	AgeAccelGrim	CD4T	-0.260169	0.0465095	3.9519e-08	7.40319
11672	Meta	AgeAccelGrim	CD4T	-0.215783	0.00903947	6.09412e-126	125.215
711	FHS	AgeAccelGrim	CD4.naive	-0.0526755	0.0375036	0.160595	0.794269
1746	JHS	AgeAccelGrim	CD4.naive	-0.129409	0.0237443	5.75211e-08	7.24017
1430	InChianti	AgeAccelGrim	CD4.naive	-0.0664299	0.0264044	0.0119828	1.92144
788	BLSA	AgeAccelGrim	CD4.naive	-0.13168	0.0353582	0.000209964	3.67785
692	LBC21	AgeAccelGrim	CD4.naive	-0.100762	0.0378756	0.00798771	2.09758
2796	LBC36	AgeAccelGrim	CD4.naive	-0.0550232	0.0188898	0.0036099	2.4425
1402	NAS	AgeAccelGrim	CD4.naive	0.103858	0.0265816	9.7853e-05	4.00943
998	WHI BA23 White	AgeAccelGrim	CD4.naive	-0.0332253	0.0316687	0.294362	0.531118
676	WHI BA23 AfricanA	AgeAccelGrim	CD4.naive	-0.160841	0.0380171	2.65142e-05	4.57652
433	WHI BA23 Hispanic	AgeAccelGrim	CD4.naive	-0.133114	0.0477396	0.00553243	2.25708
11672	Meta	AgeAccelGrim	CD4.naive	-0.0635863	0.00922081	5.35021e-12	11.2716
711	FHS	AgeAccelGrim	CD8.naive	-0.153385	0.0371114	4.0071e-05	4.39717
1746	JHS	AgeAccelGrim	CD8.naive	-0.216128	0.0233797	6.6856e-20	19.1749
1430	InChianti	AgeAccelGrim	CD8.naive	-0.157387	0.026133	2.18014e-09	8.66151
788	BLSA	AgeAccelGrim	CD8.naive	-0.241556	0.0346126	6.32841e-12	11.1987
692	LBC21	AgeAccelGrim	CD8.naive	-0.244446	0.0369144	7.13087e-11	10.1469
2796	LBC36	AgeAccelGrim	CD8.naive	-0.17319	0.0186326	2.87535e-20	19.5413
1402	NAS	AgeAccelGrim	CD8.naive	-0.259322	0.0258118	5.58538e-23	22.2529
998	WHI BA23 White	AgeAccelGrim	CD8.naive	-0.197496	0.0310621	3.10592e-10	9.50781
676	WHI BA23 AfricanA	AgeAccelGrim	CD8.naive	-0.340825	0.0362123	7.54807e-20	19.1222
433	WHI BA23 Hispanic	AgeAccelGrim	CD8.naive	-0.227175	0.0469089	1.78704e-06	5.74787
11672	Meta	AgeAccelGrim	CD8.naive	-0.210597	0.00904499	6.55151e-120	119.184
711	FHS	AgeAccelGrim	CD8T	-0.0690487	0.0374662	0.0657517	1.18209
1746	JHS	AgeAccelGrim	CD8T	-0.104243	0.0238152	1.27374e-05	4.89492
1430	InChianti	AgeAccelGrim	CD8T	-0.0918527	0.0263509	0.000505628	3.29617
788	BLSA	AgeAccelGrim	CD8T	-0.124947	0.0353893	0.000438706	3.35783
692	LBC21	AgeAccelGrim	CD8T	0.102853	0.0378675	0.00677053	2.16938
2796	LBC36	AgeAccelGrim	CD8T	-0.0417639	0.018902	0.0272211	1.56509
1402	NAS	AgeAccelGrim	CD8T	0.0578373	0.0266814	0.0303494	1.51785
998	WHI BA23 White	AgeAccelGrim	CD8T	0.00603225	0.0316856	0.849052	0.0710659
676	WHI BA23 AfricanA	AgeAccelGrim	CD8T	-0.02561	0.0385059	0.506219	0.295662
433	WHI BA23 Hispanic	AgeAccelGrim	CD8T	0.00202337	0.0481682	0.966513	0.0147922
11672	Meta	AgeAccelGrim	CD8T	-0.0374978	0.00923845	4.93086e-05	4.30708
711	FHS	AgeAccelGrim	CD8.ex	0.262929	0.0362344	1.04635e-12	11.9803
1746	JHS	AgeAccelGrim	CD8.ex	0.169833	0.0235978	9.10827e-13	12.0406
1430	InChianti	AgeAccelGrim	CD8.ex	0.144888	0.0261836	3.72831e-08	7.42849
788	BLSA	AgeAccelGrim	CD8.ex	0.210703	0.0348681	2.33646e-09	8.63144
692	LBC21	AgeAccelGrim	CD8.ex	0.191885	0.0373619	3.6586e-07	6.43668
2796	LBC36	AgeAccelGrim	CD8.ex	0.246759	0.0183335	4.66689e-40	39.331
1402	NAS	AgeAccelGrim	CD8.ex	0.174569	0.0263157	4.66612e-11	10.331
998	WHI BA23 White	AgeAccelGrim	CD8.ex	0.152294	0.0313166	1.3427e-06	5.87202
676	WHI BA23 AfricanA	AgeAccelGrim	CD8.ex	0.254485	0.0372504	1.87785e-11	10.7263
433	WHI BA23 Hispanic	AgeAccelGrim	CD8.ex	0.190366	0.0472875	6.71073e-05	4.17323
11672	Meta	AgeAccelGrim	CD8.ex	0.200416	0.00906784	3.03006e-108	107.519
711	FHS	AgeAccelGrim	NK	-0.226152	0.0365828	1.06857e-09	8.9712
1746	JHS	AgeAccelGrim	NK	-0.122155	0.0237663	3.05869e-07	6.51446
1430	InChianti	AgeAccelGrim	NK	-0.127709	0.0262461	1.26618e-06	5.89751
788	BLSA	AgeAccelGrim	NK	-0.0815731	0.0355499	0.0220185	1.65721
692	LBC21	AgeAccelGrim	NK	-0.0836879	0.0379358	0.02771	1.55736
2796	LBC36	AgeAccelGrim	NK	-0.0862437	0.018848	4.95231e-06	5.30519
1402	NAS	AgeAccelGrim	NK	-0.128391	0.0265049	1.41354e-06	5.84969
998	WHI BA23 White	AgeAccelGrim	NK	-0.164483	0.0312546	1.73841e-07	6.75985
676	WHI BA23 AfricanA	AgeAccelGrim	NK	-0.0589067	0.0384517	0.126	0.89963
433	WHI BA23 Hispanic	AgeAccelGrim	NK	-0.0865803	0.0479874	0.0718935	1.14331
11672	Meta	AgeAccelGrim	NK	-0.115377	0.00919479	4.07432e-36	35.3899
711	FHS	AgeAccelGrim	PB	0.331037	0.0354383	1.2084e-19	18.9178
1746	JHS	AgeAccelGrim	PB	0.21964	0.0233609	1.6212e-20	19.7902
1430	InChianti	AgeAccelGrim	PB	0.253506	0.0255984	2.0854e-22	21.6808
788	BLSA	AgeAccelGrim	PB	0.225952	0.0347464	1.40026e-10	9.85379
692	LBC21	AgeAccelGrim	PB	0.156909	0.0375978	3.38508e-05	4.47043
2796	LBC36	AgeAccelGrim	PB	0.241762	0.0183573	1.79028e-38	37.7471
1402	NAS	AgeAccelGrim	PB	0.00377361	0.0267259	0.887735	0.0517166
998	WHI BA23 White	AgeAccelGrim	PB	0.223937	0.0308815	8.2684e-13	12.0826
676	WHI BA23 AfricanA	AgeAccelGrim	PB	0.174633	0.0379267	4.94288e-06	5.30602
433	WHI BA23 Hispanic	AgeAccelGrim	PB	0.209959	0.0470946	1.05522e-05	4.97666
11672	Meta	AgeAccelGrim	PB	0.206052	0.00903414	3.80303e-115	114.42
711	FHS	AgeAccelGrim	Mono	0.0681502	0.0374685	0.0693534	1.15893
1746	JHS	AgeAccelGrim	Mono	0.121215	0.0237691	3.77235e-07	6.42339
1430	InChianti	AgeAccelGrim	Mono	0.144106	0.0261866	4.41889e-08	7.35469
788	BLSA	AgeAccelGrim	Mono	0.199092	0.0349548	1.73619e-08	7.7604
692	LBC21	AgeAccelGrim	Mono	0.133349	0.0377294	0.000436035	3.36048
2796	LBC36	AgeAccelGrim	Mono	0.103442	0.018817	4.20553e-08	7.37618
1402	NAS	AgeAccelGrim	Mono	0.0512803	0.026691	0.0549014	1.26042
998	WHI BA23 White	AgeAccelGrim	Mono	-0.0559216	0.0316366	0.0774304	1.11109
676	WHI BA23 AfricanA	AgeAccelGrim	Mono	0.0526507	0.0384651	0.171521	0.765684
433	WHI BA23 Hispanic	AgeAccelGrim	Mono	0.0232519	0.0481553	0.629446	0.201041
11672	Meta	AgeAccelGrim	Mono	0.0918751	0.00920743	1.8957e-23	22.7222
711	FHS	AgeAccelGrim	Gran	0.365004	0.0349647	7.89946e-24	23.1024
1746	JHS	AgeAccelGrim	Gran	0.254957	0.0231543	2.61531e-27	26.5825
1430	InChianti	AgeAccelGrim	Gran	0.226067	0.0257777	4.98966e-18	17.3019
788	BLSA	AgeAccelGrim	Gran	0.224683	0.0347568	1.78388e-10	9.74863
692	LBC21	AgeAccelGrim	Gran	0.0906833	0.0379125	0.0170276	1.76885
2796	LBC36	AgeAccelGrim	Gran	0.234664	0.0183902	2.75927e-36	35.5592
1402	NAS	AgeAccelGrim	Gran	0.06527	0.0266691	0.0145114	1.83829
998	WHI BA23 White	AgeAccelGrim	Gran	0.245069	0.03072	4.08282e-15	14.389
676	WHI BA23 AfricanA	AgeAccelGrim	Gran	0.188051	0.0378314	8.46738e-07	6.07225
433	WHI BA23 Hispanic	AgeAccelGrim	Gran	0.249278	0.0466477	1.47759e-07	6.83045
11672	Meta	AgeAccelGrim	Gran	0.215962	0.0090195	1.07022e-126	125.971
711	FHS	DNAmADMAdjAge	Bcell	0.0139509	0.0375521	0.71037	0.148516
1746	JHS	DNAmADMAdjAge	Bcell	-0.0438384	0.0239226	0.0670463	1.17363
1430	InChianti	DNAmADMAdjAge	Bcell	-0.0164552	0.0264592	0.534102	0.272376
788	BLSA	DNAmADMAdjAge	Bcell	-0.0616816	0.0356009	0.0835617	1.07799
692	LBC21	DNAmADMAdjAge	Bcell	0.0844095	0.0379335	0.0263905	1.57855
2796	LBC36	DNAmADMAdjAge	Bcell	-0.0918474	0.0188385	1.14603e-06	5.9408
1402	NAS	DNAmADMAdjAge	Bcell	-0.072024	0.0266567	0.00697751	2.1563
998	WHI BA23 White	DNAmADMAdjAge	Bcell	-0.180992	0.0311629	8.50122e-09	8.07052
676	WHI BA23 AfricanA	DNAmADMAdjAge	Bcell	-0.154169	0.0380581	5.69596e-05	4.24443
433	WHI BA23 Hispanic	DNAmADMAdjAge	Bcell	-0.285139	0.0461687	1.52129e-09	8.81779
11672	Meta	DNAmADMAdjAge	Bcell	-0.0735766	0.00921231	1.38514e-15	14.8585
711	FHS	DNAmADMAdjAge	CD4T	0.0485552	0.0375115	0.195946	0.707864
1746	JHS	DNAmADMAdjAge	CD4T	-0.00368869	0.0239455	0.877592	0.0567074
1430	InChianti	DNAmADMAdjAge	CD4T	0.0228079	0.0264559	0.388772	0.410305
788	BLSA	DNAmADMAdjAge	CD4T	-0.00709934	0.0356679	0.842283	0.074542
692	LBC21	DNAmADMAdjAge	CD4T	-0.170503	0.0375119	6.47675e-06	5.18864
2796	LBC36	DNAmADMAdjAge	CD4T	-0.0919773	0.0188383	1.10664e-06	5.95599
1402	NAS	DNAmADMAdjAge	CD4T	-0.135239	0.0264806	3.7222e-07	6.4292
998	WHI BA23 White	DNAmADMAdjAge	CD4T	-0.113793	0.0314804	0.000315719	3.5007
676	WHI BA23 AfricanA	DNAmADMAdjAge	CD4T	-0.0929681	0.0383517	0.0156089	1.80663
433	WHI BA23 Hispanic	DNAmADMAdjAge	CD4T	-0.163011	0.047524	0.000661546	3.17944
11672	Meta	DNAmADMAdjAge	CD4T	-0.0653582	0.00922305	1.37646e-12	11.8612
711	FHS	DNAmADMAdjAge	CD4.naive	0.152872	0.0371144	4.25488e-05	4.37111
1746	JHS	DNAmADMAdjAge	CD4.naive	0.0799494	0.023869	0.000826814	3.08259
1430	InChianti	DNAmADMAdjAge	CD4.naive	0.102431	0.0263236	0.000104326	3.98161
788	BLSA	DNAmADMAdjAge	CD4.naive	0.106636	0.0354654	0.00272454	2.56471
692	LBC21	DNAmADMAdjAge	CD4.naive	0.0720889	0.0379703	0.0580393	1.23628
2796	LBC36	DNAmADMAdjAge	CD4.naive	0.161548	0.01867	8.33383e-18	17.0792
1402	NAS	DNAmADMAdjAge	CD4.naive	0.0177214	0.0267219	0.507325	0.294714
998	WHI BA23 White	DNAmADMAdjAge	CD4.naive	0.0608619	0.0316275	0.054597	1.26283
676	WHI BA23 AfricanA	DNAmADMAdjAge	CD4.naive	-0.0440731	0.0384811	0.252484	0.597766
433	WHI BA23 Hispanic	DNAmADMAdjAge	CD4.naive	-0.0369385	0.0481354	0.443271	0.35333
11672	Meta	DNAmADMAdjAge	CD4.naive	0.0879922	0.00921008	1.2491e-21	20.9034
711	FHS	DNAmADMAdjAge	CD8.naive	-0.0765506	0.0374456	0.0412913	1.38414
1746	JHS	DNAmADMAdjAge	CD8.naive	-0.0559074	0.0239082	0.019478	1.71046
1430	InChianti	DNAmADMAdjAge	CD8.naive	0.0797505	0.0263785	0.00254482	2.59434
788	BLSA	DNAmADMAdjAge	CD8.naive	-0.0673601	0.0355878	0.0587533	1.23097
692	LBC21	DNAmADMAdjAge	CD8.naive	0.0564182	0.0380087	0.138173	0.859576
2796	LBC36	DNAmADMAdjAge	CD8.naive	0.0910118	0.01884	1.43339e-06	5.84364
1402	NAS	DNAmADMAdjAge	CD8.naive	-0.162972	0.0263688	8.36588e-10	9.07749
998	WHI BA23 White	DNAmADMAdjAge	CD8.naive	-0.0464228	0.0316521	0.142784	0.845321
676	WHI BA23 AfricanA	DNAmADMAdjAge	CD8.naive	-0.172854	0.0379388	6.18531e-06	5.20864
433	WHI BA23 Hispanic	DNAmADMAdjAge	CD8.naive	-0.0250196	0.0481532	0.603621	0.219236
11672	Meta	DNAmADMAdjAge	CD8.naive	-0.0176101	0.00922088	0.0561587	1.25058
711	FHS	DNAmADMAdjAge	CD8T	-0.11526	0.0373055	0.00208245	2.68143
1746	JHS	DNAmADMAdjAge	CD8T	-0.0674018	0.0238912	0.00483869	2.31527
1430	InChianti	DNAmADMAdjAge	CD8T	-0.174362	0.0260574	3.16464e-11	10.4997
788	BLSA	DNAmADMAdjAge	CD8T	-0.0846203	0.0355409	0.0175064	1.7568
692	LBC21	DNAmADMAdjAge	CD8T	0.0947442	0.0378981	0.0126514	1.89786
2796	LBC36	DNAmADMAdjAge	CD8T	0.0480939	0.0188966	0.0109777	1.95949
1402	NAS	DNAmADMAdjAge	CD8T	-0.0783271	0.026644	0.00333851	2.47645
998	WHI BA23 White	DNAmADMAdjAge	CD8T	-0.0441858	0.0316553	0.163072	0.78762
676	WHI BA23 AfricanA	DNAmADMAdjAge	CD8T	-0.0145143	0.0385145	0.706402	0.150948
433	WHI BA23 Hispanic	DNAmADMAdjAge	CD8T	-0.0297591	0.048147	0.536843	0.270153
11672	Meta	DNAmADMAdjAge	CD8T	-0.0426687	0.00922775	3.76492e-06	5.42424
711	FHS	DNAmADMAdjAge	CD8.ex	0.0499344	0.0375089	0.183529	0.736295
1746	JHS	DNAmADMAdjAge	CD8.ex	-0.0232891	0.0239392	0.330766	0.48048
1430	InChianti	DNAmADMAdjAge	CD8.ex	-0.0913728	0.0263521	0.000541159	3.26668
788	BLSA	DNAmADMAdjAge	CD8.ex	0.12972	0.0353674	0.000261163	3.58309
692	LBC21	DNAmADMAdjAge	CD8.ex	-0.0118683	0.0380667	0.755304	0.121878
2796	LBC36	DNAmADMAdjAge	CD8.ex	0.0312881	0.0189092	0.0981084	1.00829
1402	NAS	DNAmADMAdjAge	CD8.ex	0.156488	0.0263969	3.84956e-09	8.41459
998	WHI BA23 White	DNAmADMAdjAge	CD8.ex	0.0853526	0.0315706	0.0069772	2.15632
676	WHI BA23 AfricanA	DNAmADMAdjAge	CD8.ex	0.134178	0.0381702	0.000468745	3.32906
433	WHI BA23 Hispanic	DNAmADMAdjAge	CD8.ex	0.102131	0.0479164	0.0336185	1.47342
11672	Meta	DNAmADMAdjAge	CD8.ex	0.0419922	0.0092283	5.35512e-06	5.27123
711	FHS	DNAmADMAdjAge	NK	-0.265608	0.0362068	6.03998e-13	12.219
1746	JHS	DNAmADMAdjAge	NK	-0.126866	0.0237522	1.04428e-07	6.98118
1430	InChianti	DNAmADMAdjAge	NK	-0.224045	0.0257901	9.98293e-18	17.0007
788	BLSA	DNAmADMAdjAge	NK	-0.160748	0.035205	5.76674e-06	5.23907
692	LBC21	DNAmADMAdjAge	NK	-0.123712	0.0377769	0.00111018	2.95461
2796	LBC36	DNAmADMAdjAge	NK	-0.141532	0.0187281	5.54767e-14	13.2559
1402	NAS	DNAmADMAdjAge	NK	-0.183782	0.0262709	4.07961e-12	11.3894
998	WHI BA23 White	DNAmADMAdjAge	NK	-0.162536	0.0312649	2.43489e-07	6.61352
676	WHI BA23 AfricanA	DNAmADMAdjAge	NK	-0.0278183	0.0385037	0.470247	0.327674
433	WHI BA23 Hispanic	DNAmADMAdjAge	NK	-0.101383	0.0479201	0.0349468	1.45659
11672	Meta	DNAmADMAdjAge	NK	-0.156912	0.00913653	4.14889e-66	65.3821
711	FHS	DNAmADMAdjAge	PB	0.0703689	0.0374627	0.0607403	1.21652
1746	JHS	DNAmADMAdjAge	PB	0.0394656	0.023927	0.0992423	1.0033
1430	InChianti	DNAmADMAdjAge	PB	0.0891371	0.0263575	0.000739441	3.1311
788	BLSA	DNAmADMAdjAge	PB	0.0644969	0.0355946	0.0703697	1.15261
692	LBC21	DNAmADMAdjAge	PB	0.292991	0.0363987	3.64046e-15	14.4388
2796	LBC36	DNAmADMAdjAge	PB	0.222779	0.0184431	8.78783e-33	32.0561
1402	NAS	DNAmADMAdjAge	PB	0.172112	0.0263273	8.74728e-11	10.0581
998	WHI BA23 White	DNAmADMAdjAge	PB	0.206714	0.0310018	4.29602e-11	10.3669
676	WHI BA23 AfricanA	DNAmADMAdjAge	PB	0.114244	0.0382664	0.00293384	2.53256
433	WHI BA23 Hispanic	DNAmADMAdjAge	PB	0.148314	0.0476356	0.00197194	2.70511
11672	Meta	DNAmADMAdjAge	PB	0.14856	0.00913271	1.6985e-59	58.7699
711	FHS	DNAmADMAdjAge	Mono	-0.159733	0.0370736	1.87547e-05	4.72689
1746	JHS	DNAmADMAdjAge	Mono	-0.0390675	0.0239274	0.102702	0.988423
1430	InChianti	DNAmADMAdjAge	Mono	-0.133971	0.0262243	3.68288e-07	6.43381
788	BLSA	DNAmADMAdjAge	Mono	-0.123992	0.0353936	0.000485616	3.31371
692	LBC21	DNAmADMAdjAge	Mono	-0.128482	0.0377538	0.000704615	3.15205
2796	LBC36	DNAmADMAdjAge	Mono	-0.156457	0.0186855	8.753e-17	16.0578
1402	NAS	DNAmADMAdjAge	Mono	0.109131	0.0265665	4.2249e-05	4.37418
998	WHI BA23 White	DNAmADMAdjAge	Mono	-0.0869198	0.0315663	0.0060023	2.22168
676	WHI BA23 AfricanA	DNAmADMAdjAge	Mono	0.0529878	0.0384644	0.16879	0.772652
433	WHI BA23 Hispanic	DNAmADMAdjAge	Mono	-0.0245966	0.0481537	0.609757	0.214843
11672	Meta	DNAmADMAdjAge	Mono	-0.0781638	0.00919799	1.93016e-17	16.7144
711	FHS	DNAmADMAdjAge	Gran	0.136189	0.0372059	0.000270508	3.56782
1746	JHS	DNAmADMAdjAge	Gran	0.094079	0.0238395	8.24984e-05	4.08355
1430	InChianti	DNAmADMAdjAge	Gran	0.176346	0.0260481	1.875e-11	10.727
788	BLSA	DNAmADMAdjAge	Gran	0.146466	0.0352842	3.67136e-05	4.43517
692	LBC21	DNAmADMAdjAge	Gran	0.143915	0.037673	0.00014542	3.83738
2796	LBC36	DNAmADMAdjAge	Gran	0.154242	0.0186921	2.37671e-16	15.624
1402	NAS	DNAmADMAdjAge	Gran	0.192209	0.0262278	3.92008e-13	12.4067
998	WHI BA23 White	DNAmADMAdjAge	Gran	0.213023	0.0309589	1.05059e-11	10.9786
676	WHI BA23 AfricanA	DNAmADMAdjAge	Gran	0.0966199	0.0383383	0.011959	1.9223
433	WHI BA23 Hispanic	DNAmADMAdjAge	Gran	0.230797	0.0468678	1.20757e-06	5.91809
11672	Meta	DNAmADMAdjAge	Gran	0.155272	0.00914458	1.1604e-64	63.9354
711	FHS	DNAmB2MAdjAge	Bcell	-0.0401875	0.0375254	0.284561	0.545825
1746	JHS	DNAmB2MAdjAge	Bcell	-0.0124804	0.0239438	0.602268	0.220211
1430	InChianti	DNAmB2MAdjAge	Bcell	-0.0880853	0.0263599	0.000854384	3.06835
788	BLSA	DNAmB2MAdjAge	Bcell	-0.0257752	0.035657	0.469977	0.327923
692	LBC21	DNAmB2MAdjAge	Bcell	0.102522	0.0378688	0.0069511	2.15795
2796	LBC36	DNAmB2MAdjAge	Bcell	-0.0610491	0.0188832	0.00123932	2.90682
1402	NAS	DNAmB2MAdjAge	Bcell	-0.0587709	0.0266799	0.0277705	1.55642
998	WHI BA23 White	DNAmB2MAdjAge	Bcell	-0.168607	0.0312326	8.4044e-08	7.07549
676	WHI BA23 AfricanA	DNAmB2MAdjAge	Bcell	-0.0370439	0.0384921	0.336205	0.473395
433	WHI BA23 Hispanic	DNAmB2MAdjAge	Bcell	-0.0648119	0.048067	0.178249	0.748972
11672	Meta	DNAmB2MAdjAge	Bcell	-0.0516682	0.00923726	2.22588e-08	7.6525
711	FHS	DNAmB2MAdjAge	CD4T	-0.239664	0.0364613	9.5513e-11	10.0199
1746	JHS	DNAmB2MAdjAge	CD4T	-0.0656219	0.023894	0.00608778	2.21554
1430	InChianti	DNAmB2MAdjAge	CD4T	-0.220062	0.0258141	3.83448e-17	16.4163
788	BLSA	DNAmB2MAdjAge	CD4T	-0.133952	0.0353474	0.000162435	3.78932
692	LBC21	DNAmB2MAdjAge	CD4T	-0.0601514	0.0380004	0.113899	0.94348
2796	LBC36	DNAmB2MAdjAge	CD4T	-0.171171	0.0186393	7.91655e-20	19.1015
1402	NAS	DNAmB2MAdjAge	CD4T	-0.173587	0.0263204	6.00521e-11	10.2215
998	WHI BA23 White	DNAmB2MAdjAge	CD4T	-0.297699	0.0302496	7.14271e-22	21.1461
676	WHI BA23 AfricanA	DNAmB2MAdjAge	CD4T	-0.137631	0.038152	0.000332095	3.47874
433	WHI BA23 Hispanic	DNAmB2MAdjAge	CD4T	-0.2217	0.0469696	3.19249e-06	5.49587
11672	Meta	DNAmB2MAdjAge	CD4T	-0.169094	0.00910889	6.32652e-77	76.1988
711	FHS	DNAmB2MAdjAge	CD4.naive	-0.152684	0.0371154	4.34937e-05	4.36157
1746	JHS	DNAmB2MAdjAge	CD4.naive	-0.0608679	0.0239013	0.0109618	1.96012
1430	InChianti	DNAmB2MAdjAge	CD4.naive	-0.148489	0.0261694	1.68509e-08	7.77338
788	BLSA	DNAmB2MAdjAge	CD4.naive	-0.116059	0.0354278	0.00109934	2.95887
692	LBC21	DNAmB2MAdjAge	CD4.naive	-0.229949	0.0370492	9.34194e-10	9.02956
2796	LBC36	DNAmB2MAdjAge	CD4.naive	-0.182073	0.0186023	2.88672e-22	21.5396
1402	NAS	DNAmB2MAdjAge	CD4.naive	0.0166206	0.0267224	0.534062	0.272408
998	WHI BA23 White	DNAmB2MAdjAge	CD4.naive	-0.209835	0.0309808	2.15223e-11	10.6671
676	WHI BA23 AfricanA	DNAmB2MAdjAge	CD4.naive	-0.125097	0.038216	0.00111678	2.95203
433	WHI BA23 Hispanic	DNAmB2MAdjAge	CD4.naive	-0.226102	0.0469209	2.00455e-06	5.69798
11672	Meta	DNAmB2MAdjAge	CD4.naive	-0.134424	0.00915436	8.14978e-49	48.0889
711	FHS	DNAmB2MAdjAge	CD8.naive	-0.253041	0.0363336	7.53685e-12	11.1228
1746	JHS	DNAmB2MAdjAge	CD8.naive	-0.122976	0.0237639	2.54379e-07	6.59452
1430	InChianti	DNAmB2MAdjAge	CD8.naive	0.00552361	0.0264624	0.834686	0.0784771
788	BLSA	DNAmB2MAdjAge	CD8.naive	-0.242068	0.034608	5.69598e-12	11.2444
692	LBC21	DNAmB2MAdjAge	CD8.naive	-0.413188	0.0346677	6.52223e-30	29.1856
2796	LBC36	DNAmB2MAdjAge	CD8.naive	-0.274836	0.01819	1.22184e-49	48.913
1402	NAS	DNAmB2MAdjAge	CD8.naive	-0.194259	0.026217	2.18076e-13	12.6614
998	WHI BA23 White	DNAmB2MAdjAge	CD8.naive	-0.30015	0.0302252	3.17853e-22	21.4978
676	WHI BA23 AfricanA	DNAmB2MAdjAge	CD8.naive	-0.184585	0.0378567	1.35233e-06	5.86892
433	WHI BA23 Hispanic	DNAmB2MAdjAge	CD8.naive	-0.283068	0.0461982	2.01853e-09	8.69497
11672	Meta	DNAmB2MAdjAge	CD8.naive	-0.214433	0.00899427	1.25434e-125	124.902
711	FHS	DNAmB2MAdjAge	CD8T	-0.0388306	0.0375275	0.30115	0.521217
1746	JHS	DNAmB2MAdjAge	CD8T	-0.0274139	0.0239367	0.252256	0.598159
1430	InChianti	DNAmB2MAdjAge	CD8T	-0.0797109	0.0263786	0.00255746	2.59219
788	BLSA	DNAmB2MAdjAge	CD8T	-0.00698178	0.0356679	0.844861	0.0732146
692	LBC21	DNAmB2MAdjAge	CD8T	-0.037795	0.0380421	0.320813	0.493748
2796	LBC36	DNAmB2MAdjAge	CD8T	-0.10204	0.0188198	6.39754e-08	7.19399
1402	NAS	DNAmB2MAdjAge	CD8T	0.0345641	0.0267102	0.195863	0.708047
998	WHI BA23 White	DNAmB2MAdjAge	CD8T	-0.0134209	0.0316834	0.671953	0.172661
676	WHI BA23 AfricanA	DNAmB2MAdjAge	CD8T	-0.0330252	0.0384975	0.391279	0.407513
433	WHI BA23 Hispanic	DNAmB2MAdjAge	CD8T	-0.00640529	0.0481673	0.894271	0.0485307
11672	Meta	DNAmB2MAdjAge	CD8T	-0.0427172	0.00924637	3.83945e-06	5.41573
711	FHS	DNAmB2MAdjAge	CD8.ex	0.230299	0.0365463	5.1738e-10	9.28619
1746	JHS	DNAmB2MAdjAge	CD8.ex	0.0613324	0.0239006	0.0103664	1.98437
1430	InChianti	DNAmB2MAdjAge	CD8.ex	0.0569971	0.0264198	0.0311437	1.50663
788	BLSA	DNAmB2MAdjAge	CD8.ex	0.128739	0.035372	0.000290966	3.53616
692	LBC21	DNAmB2MAdjAge	CD8.ex	0.325669	0.035994	1.46468e-18	17.8343
2796	LBC36	DNAmB2MAdjAge	CD8.ex	0.261798	0.0182587	4.81072e-45	44.3178
1402	NAS	DNAmB2MAdjAge	CD8.ex	0.168109	0.0263458	2.38798e-10	9.62197
998	WHI BA23 White	DNAmB2MAdjAge	CD8.ex	0.236855	0.0307846	3.42213e-14	13.4657
676	WHI BA23 AfricanA	DNAmB2MAdjAge	CD8.ex	0.113702	0.0382688	0.00307259	2.5125
433	WHI BA23 Hispanic	DNAmB2MAdjAge	CD8.ex	0.166991	0.0474919	0.000484193	3.31498
11672	Meta	DNAmB2MAdjAge	CD8.ex	0.176895	0.00908163	1.67654e-84	83.7756
711	FHS	DNAmB2MAdjAge	NK	-0.140342	0.0371841	0.000173915	3.75966
1746	JHS	DNAmB2MAdjAge	NK	0.0158662	0.0239426	0.507627	0.294455
1430	InChianti	DNAmB2MAdjAge	NK	-0.0895017	0.0263566	0.000703071	3.153
788	BLSA	DNAmB2MAdjAge	NK	0.00541983	0.0356683	0.879265	0.0558804
692	LBC21	DNAmB2MAdjAge	NK	0.0506502	0.0380205	0.18324	0.736979
2796	LBC36	DNAmB2MAdjAge	NK	-0.0629175	0.018881	0.000872478	3.05925
1402	NAS	DNAmB2MAdjAge	NK	-0.0452031	0.0266988	0.0906636	1.04257
998	WHI BA23 White	DNAmB2MAdjAge	NK	-0.0794922	0.0315859	0.0120022	1.92074
676	WHI BA23 AfricanA	DNAmB2MAdjAge	NK	-0.0840464	0.0383823	0.0288867	1.5393
433	WHI BA23 Hispanic	DNAmB2MAdjAge	NK	-0.0171565	0.0481612	0.721842	0.141558
11672	Meta	DNAmB2MAdjAge	NK	-0.0467649	0.00924293	4.20283e-07	6.37646
711	FHS	DNAmB2MAdjAge	PB	0.17172	0.0369979	4.12419e-06	5.38466
1746	JHS	DNAmB2MAdjAge	PB	0.0443989	0.023922	0.0636244	1.19638
1430	InChianti	DNAmB2MAdjAge	PB	0.175012	0.0260544	2.66751e-11	10.5739
788	BLSA	DNAmB2MAdjAge	PB	0.0824107	0.0355475	0.0206873	1.6843
692	LBC21	DNAmB2MAdjAge	PB	-0.173532	0.0374918	4.4001e-06	5.35654
2796	LBC36	DNAmB2MAdjAge	PB	-0.0498422	0.018895	0.00838954	2.07626
1402	NAS	DNAmB2MAdjAge	PB	0.0828771	0.0266342	0.00189786	2.72174
998	WHI BA23 White	DNAmB2MAdjAge	PB	0.245638	0.0307154	3.51336e-15	14.4543
676	WHI BA23 AfricanA	DNAmB2MAdjAge	PB	0.150343	0.0380808	8.70873e-05	4.06005
433	WHI BA23 Hispanic	DNAmB2MAdjAge	PB	0.1769	0.0474086	0.000215924	3.6657
11672	Meta	DNAmB2MAdjAge	PB	0.0693634	0.00918281	4.2334e-14	13.3733
711	FHS	DNAmB2MAdjAge	Mono	0.0962474	0.0373814	0.0102333	1.98999
1746	JHS	DNAmB2MAdjAge	Mono	0.0341603	0.0239317	0.153641	0.813494
1430	InChianti	DNAmB2MAdjAge	Mono	0.0658054	0.0264054	0.0128112	1.89241
788	BLSA	DNAmB2MAdjAge	Mono	0.109767	0.0354533	0.00203045	2.69241
692	LBC21	DNAmB2MAdjAge	Mono	0.123472	0.037778	0.00113535	2.94487
2796	LBC36	DNAmB2MAdjAge	Mono	0.161998	0.0186686	6.74539e-18	17.171
1402	NAS	DNAmB2MAdjAge	Mono	0.0795256	0.0266415	0.00288471	2.5399
998	WHI BA23 White	DNAmB2MAdjAge	Mono	0.0750193	0.0315969	0.0177728	1.75024
676	WHI BA23 AfricanA	DNAmB2MAdjAge	Mono	0.0607524	0.0384474	0.114543	0.94103
433	WHI BA23 Hispanic	DNAmB2MAdjAge	Mono	0.108153	0.0478858	0.0244098	1.61244
11672	Meta	DNAmB2MAdjAge	Mono	0.0964833	0.00921176	1.13821e-25	24.9438
711	FHS	DNAmB2MAdjAge	Gran	0.193791	0.0368438	1.9119e-07	6.71853
1746	JHS	DNAmB2MAdjAge	Gran	0.0466686	0.0239196	0.0512095	1.29065
1430	InChianti	DNAmB2MAdjAge	Gran	0.193559	0.0259624	1.54736e-13	12.8104
788	BLSA	DNAmB2MAdjAge	Gran	0.0664739	0.0355899	0.0621655	1.20645
692	LBC21	DNAmB2MAdjAge	Gran	-0.125722	0.0377673	0.000918352	3.03699
2796	LBC36	DNAmB2MAdjAge	Gran	0.046391	0.0188981	0.0141571	1.84902
1402	NAS	DNAmB2MAdjAge	Gran	0.0931269	0.02661	0.000480392	3.3184
998	WHI BA23 White	DNAmB2MAdjAge	Gran	0.241288	0.03075	1.09697e-14	13.9598
676	WHI BA23 AfricanA	DNAmB2MAdjAge	Gran	0.135115	0.0381653	0.000427249	3.36932
433	WHI BA23 Hispanic	DNAmB2MAdjAge	Gran	0.136143	0.0477198	0.00453979	2.34296
11672	Meta	DNAmB2MAdjAge	Gran	0.0965879	0.0091847	7.27645e-26	25.1381
711	FHS	DNAmCystatinCAdjAge	Bcell	-0.191042	0.0368641	2.86002e-07	6.54363
1746	JHS	DNAmCystatinCAdjAge	Bcell	-0.277606	0.0230045	2.91063e-32	31.536
1430	InChianti	DNAmCystatinCAdjAge	Bcell	-0.18885	0.0259866	6.01886e-13	12.2205
788	BLSA	DNAmCystatinCAdjAge	Bcell	-0.258077	0.0344605	1.86609e-13	12.7291
692	LBC21	DNAmCystatinCAdjAge	Bcell	-0.026526	0.038056	0.486021	0.313345
2796	LBC36	DNAmCystatinCAdjAge	Bcell	-0.208722	0.0185018	6.78533e-29	28.1684
1402	NAS	DNAmCystatinCAdjAge	Bcell	-0.116645	0.0265437	1.19419e-05	4.92293
998	WHI BA23 White	DNAmCystatinCAdjAge	Bcell	-0.257521	0.0306175	1.39725e-16	15.8547
676	WHI BA23 AfricanA	DNAmCystatinCAdjAge	Bcell	-0.176547	0.0379135	3.87386e-06	5.41186
433	WHI BA23 Hispanic	DNAmCystatinCAdjAge	Bcell	-0.187281	0.047316	8.8346e-05	4.05381
11672	Meta	DNAmCystatinCAdjAge	Bcell	-0.199935	0.00905783	5.72916e-108	107.242
711	FHS	DNAmCystatinCAdjAge	CD4T	-0.299362	0.0358335	3.46016e-16	15.4609
1746	JHS	DNAmCystatinCAdjAge	CD4T	-0.318202	0.022701	2.23056e-42	41.6516
1430	InChianti	DNAmCystatinCAdjAge	CD4T	-0.294968	0.0252854	4.22257e-30	29.3744
788	BLSA	DNAmCystatinCAdjAge	CD4T	-0.33289	0.0336345	7.60638e-22	21.1188
692	LBC21	DNAmCystatinCAdjAge	CD4T	-0.191604	0.037364	3.80749e-07	6.41936
2796	LBC36	DNAmCystatinCAdjAge	CD4T	-0.261415	0.0182606	6.50696e-45	44.1866
1402	NAS	DNAmCystatinCAdjAge	CD4T	-0.220696	0.0260671	6.29789e-17	16.2008
998	WHI BA23 White	DNAmCystatinCAdjAge	CD4T	-0.387688	0.0292081	3.8513e-37	36.4144
676	WHI BA23 AfricanA	DNAmCystatinCAdjAge	CD4T	-0.281306	0.0369631	9.23476e-14	13.0346
433	WHI BA23 Hispanic	DNAmCystatinCAdjAge	CD4T	-0.322058	0.0456019	6.60273e-12	11.1803
11672	Meta	DNAmCystatinCAdjAge	CD4T	-0.287886	0.0088599	1.33486e-231	230.875
711	FHS	DNAmCystatinCAdjAge	CD4.naive	-0.170441	0.0370063	4.87176e-06	5.31231
1746	JHS	DNAmCystatinCAdjAge	CD4.naive	-0.18021	0.0235536	3.2759e-14	13.4847
1430	InChianti	DNAmCystatinCAdjAge	CD4.naive	-0.189941	0.0259811	4.40715e-13	12.3558
788	BLSA	DNAmCystatinCAdjAge	CD4.naive	-0.219844	0.0347962	4.43229e-10	9.35337
692	LBC21	DNAmCystatinCAdjAge	CD4.naive	-0.215751	0.0371728	9.87209e-09	8.00559
2796	LBC36	DNAmCystatinCAdjAge	CD4.naive	-0.185164	0.0185914	5.50148e-23	22.2595
1402	NAS	DNAmCystatinCAdjAge	CD4.naive	0.00994992	0.0267248	0.709718	0.148914
998	WHI BA23 White	DNAmCystatinCAdjAge	CD4.naive	-0.222804	0.0308897	1.08318e-12	11.9653
676	WHI BA23 AfricanA	DNAmCystatinCAdjAge	CD4.naive	-0.217549	0.037596	1.10105e-08	7.95819
433	WHI BA23 Hispanic	DNAmCystatinCAdjAge	CD4.naive	-0.21413	0.047051	6.95284e-06	5.15784
11672	Meta	DNAmCystatinCAdjAge	CD4.naive	-0.171938	0.00910433	1.50744e-79	78.8218
711	FHS	DNAmCystatinCAdjAge	CD8.naive	-0.176022	0.0369694	2.33307e-06	5.63207
1746	JHS	DNAmCystatinCAdjAge	CD8.naive	-0.149289	0.0236773	3.63914e-10	9.439
1430	InChianti	DNAmCystatinCAdjAge	CD8.naive	-0.0846213	0.0263679	0.00136036	2.86635
788	BLSA	DNAmCystatinCAdjAge	CD8.naive	-0.169882	0.0351504	1.61754e-06	5.79115
692	LBC21	DNAmCystatinCAdjAge	CD8.naive	-0.298018	0.0363395	1.16464e-15	14.9338
2796	LBC36	DNAmCystatinCAdjAge	CD8.naive	-0.137656	0.0187384	2.6625e-13	12.5747
1402	NAS	DNAmCystatinCAdjAge	CD8.naive	-0.113166	0.0265544	2.1649e-05	4.66456
998	WHI BA23 White	DNAmCystatinCAdjAge	CD8.naive	-0.165748	0.0312479	1.39379e-07	6.8558
676	WHI BA23 AfricanA	DNAmCystatinCAdjAge	CD8.naive	-0.267091	0.0371192	1.66293e-12	11.7791
433	WHI BA23 Hispanic	DNAmCystatinCAdjAge	CD8.naive	-0.183054	0.0473544	0.000127873	3.89322
11672	Meta	DNAmCystatinCAdjAge	CD8.naive	-0.156708	0.00913544	5.88468e-66	65.2303
711	FHS	DNAmCystatinCAdjAge	CD8T	0.0126071	0.0375528	0.737185	0.132424
1746	JHS	DNAmCystatinCAdjAge	CD8T	-0.127314	0.0237508	9.41012e-08	7.0264
1430	InChianti	DNAmCystatinCAdjAge	CD8T	0.0217972	0.0264565	0.410141	0.387067
788	BLSA	DNAmCystatinCAdjAge	CD8T	-0.0667233	0.0355893	0.0611893	1.21332
692	LBC21	DNAmCystatinCAdjAge	CD8T	-0.0675774	0.0379823	0.0756505	1.12119
2796	LBC36	DNAmCystatinCAdjAge	CD8T	-0.0815376	0.0188555	1.58347e-05	4.80039
1402	NAS	DNAmCystatinCAdjAge	CD8T	0.171699	0.0263292	9.71246e-11	10.0127
998	WHI BA23 White	DNAmCystatinCAdjAge	CD8T	0.0679218	0.031613	0.0319117	1.49605
676	WHI BA23 AfricanA	DNAmCystatinCAdjAge	CD8T	-0.0954798	0.0383426	0.0130078	1.8858
433	WHI BA23 Hispanic	DNAmCystatinCAdjAge	CD8T	0.0265094	0.0481514	0.582232	0.234904
11672	Meta	DNAmCystatinCAdjAge	CD8T	-0.0214567	0.00922117	0.0199708	1.69961
711	FHS	DNAmCystatinCAdjAge	CD8.ex	0.216343	0.0366664	5.61999e-09	8.25026
1746	JHS	DNAmCystatinCAdjAge	CD8.ex	0.204166	0.0234413	6.938e-18	17.1588
1430	InChianti	DNAmCystatinCAdjAge	CD8.ex	0.129174	0.0262411	9.53388e-07	6.02073
788	BLSA	DNAmCystatinCAdjAge	CD8.ex	0.217041	0.0348186	7.43713e-10	9.12859
692	LBC21	DNAmCystatinCAdjAge	CD8.ex	0.241396	0.0369435	1.2426e-10	9.90567
2796	LBC36	DNAmCystatinCAdjAge	CD8.ex	0.230647	0.0184084	4.43658e-35	34.353
1402	NAS	DNAmCystatinCAdjAge	CD8.ex	0.053732	0.0266875	0.0442661	1.35393
998	WHI BA23 White	DNAmCystatinCAdjAge	CD8.ex	0.235024	0.0307987	5.43783e-14	13.2646
676	WHI BA23 AfricanA	DNAmCystatinCAdjAge	CD8.ex	0.221814	0.037559	5.56746e-09	8.25434
433	WHI BA23 Hispanic	DNAmCystatinCAdjAge	CD8.ex	0.153229	0.0475995	0.001383	2.85918
11672	Meta	DNAmCystatinCAdjAge	CD8.ex	0.189952	0.00907855	3.29725e-97	96.4818
711	FHS	DNAmCystatinCAdjAge	NK	-0.0728238	0.0374561	0.0522612	1.28182
1746	JHS	DNAmCystatinCAdjAge	NK	-0.0187551	0.0239414	0.433514	0.362997
1430	InChianti	DNAmCystatinCAdjAge	NK	0.039001	0.0264427	0.140453	0.85247
788	BLSA	DNAmCystatinCAdjAge	NK	-0.0281107	0.0356547	0.430692	0.365833
692	LBC21	DNAmCystatinCAdjAge	NK	-0.0371904	0.038043	0.328621	0.483305
2796	LBC36	DNAmCystatinCAdjAge	NK	-0.0355585	0.0189065	0.0601094	1.22106
1402	NAS	DNAmCystatinCAdjAge	NK	-0.0194903	0.026721	0.46588	0.331726
998	WHI BA23 White	DNAmCystatinCAdjAge	NK	-0.0711815	0.0316058	0.0245292	1.61032
676	WHI BA23 AfricanA	DNAmCystatinCAdjAge	NK	0.0168777	0.0385131	0.661358	0.179563
433	WHI BA23 Hispanic	DNAmCystatinCAdjAge	NK	0.0193962	0.0481592	0.68733	0.162834
11672	Meta	DNAmCystatinCAdjAge	NK	-0.0218471	0.00925702	0.018272	1.73821
711	FHS	DNAmCystatinCAdjAge	PB	0.200589	0.0367925	6.88552e-08	7.16206
1746	JHS	DNAmCystatinCAdjAge	PB	0.224146	0.0233364	2.53924e-21	20.5953
1430	InChianti	DNAmCystatinCAdjAge	PB	0.107417	0.0263097	4.69634e-05	4.32824
788	BLSA	DNAmCystatinCAdjAge	PB	0.275755	0.0342859	3.22566e-15	14.4914
692	LBC21	DNAmCystatinCAdjAge	PB	-0.0625824	0.0379947	0.0999858	1.00006
2796	LBC36	DNAmCystatinCAdjAge	PB	0.0349913	0.0189069	0.0643159	1.19168
1402	NAS	DNAmCystatinCAdjAge	PB	-0.12793	0.0265065	1.54289e-06	5.81167
998	WHI BA23 White	DNAmCystatinCAdjAge	PB	0.185699	0.0311351	3.40899e-09	8.46737
676	WHI BA23 AfricanA	DNAmCystatinCAdjAge	PB	0.141166	0.0381328	0.000231422	3.6356
433	WHI BA23 Hispanic	DNAmCystatinCAdjAge	PB	0.0886977	0.0479785	0.0651861	1.18585
11672	Meta	DNAmCystatinCAdjAge	PB	0.0962651	0.00915259	7.15269e-26	25.1455
711	FHS	DNAmCystatinCAdjAge	Mono	0.101623	0.0373614	0.00668779	2.17472
1746	JHS	DNAmCystatinCAdjAge	Mono	0.147127	0.0236851	6.53404e-10	9.18482
1430	InChianti	DNAmCystatinCAdjAge	Mono	0.0792202	0.0263796	0.00271909	2.56558
788	BLSA	DNAmCystatinCAdjAge	Mono	0.24118	0.0346159	6.83597e-12	11.1652
692	LBC21	DNAmCystatinCAdjAge	Mono	0.192731	0.0373556	3.24273e-07	6.48909
2796	LBC36	DNAmCystatinCAdjAge	Mono	0.190235	0.018573	3.4026e-24	23.4682
1402	NAS	DNAmCystatinCAdjAge	Mono	0.0859232	0.0266273	0.00128042	2.89265
998	WHI BA23 White	DNAmCystatinCAdjAge	Mono	0.0299508	0.031672	0.344554	0.462743
676	WHI BA23 AfricanA	DNAmCystatinCAdjAge	Mono	0.139036	0.0381444	0.000287976	3.54064
433	WHI BA23 Hispanic	DNAmCystatinCAdjAge	Mono	0.084779	0.0479949	0.0780337	1.10772
11672	Meta	DNAmCystatinCAdjAge	Mono	0.136233	0.00916129	5.12616e-50	49.2902
711	FHS	DNAmCystatinCAdjAge	Gran	0.238898	0.0364684	1.09979e-10	9.95869
1746	JHS	DNAmCystatinCAdjAge	Gran	0.3041	0.0228116	1.11622e-38	37.9523
1430	InChianti	DNAmCystatinCAdjAge	Gran	0.129271	0.0262408	9.35466e-07	6.02897
788	BLSA	DNAmCystatinCAdjAge	Gran	0.261479	0.0344279	8.74819e-14	13.0581
692	LBC21	DNAmCystatinCAdjAge	Gran	0.0280861	0.0380543	0.460733	0.336551
2796	LBC36	DNAmCystatinCAdjAge	Gran	0.127666	0.0187637	1.2411e-11	10.9062
1402	NAS	DNAmCystatinCAdjAge	Gran	-0.0328421	0.0267117	0.21909	0.659377
998	WHI BA23 White	DNAmCystatinCAdjAge	Gran	0.263582	0.0305657	2.52704e-17	16.5974
676	WHI BA23 AfricanA	DNAmCystatinCAdjAge	Gran	0.192721	0.0377965	4.44423e-07	6.3522
433	WHI BA23 Hispanic	DNAmCystatinCAdjAge	Gran	0.176076	0.0474157	0.000231297	3.63583
11672	Meta	DNAmCystatinCAdjAge	Gran	0.165361	0.0090845	4.92953e-74	73.3072
711	FHS	DNAmGDF15AdjAge	Bcell	-0.260439	0.0362597	1.73366e-12	11.761
1746	JHS	DNAmGDF15AdjAge	Bcell	-0.101275	0.0238225	2.23837e-05	4.65007
1430	InChianti	DNAmGDF15AdjAge	Bcell	-0.133464	0.0262261	4.07856e-07	6.38949
788	BLSA	DNAmGDF15AdjAge	Bcell	-0.0844286	0.0355415	0.0177643	1.75045
692	LBC21	DNAmGDF15AdjAge	Bcell	-0.0625427	0.0379948	0.100202	0.999124
2796	LBC36	DNAmGDF15AdjAge	Bcell	-0.0954947	0.018832	4.21898e-07	6.37479
1402	NAS	DNAmGDF15AdjAge	Bcell	0.0309558	0.0267133	0.246729	0.60778
998	WHI BA23 White	DNAmGDF15AdjAge	Bcell	-0.118995	0.0314611	0.000164648	3.78344
676	WHI BA23 AfricanA	DNAmGDF15AdjAge	Bcell	-0.0884802	0.0383675	0.0214062	1.66946
433	WHI BA23 Hispanic	DNAmGDF15AdjAge	Bcell	-0.0764863	0.0480272	0.111992	0.950814
11672	Meta	DNAmGDF15AdjAge	Bcell	-0.0948843	0.00920375	6.39551e-25	24.1941
711	FHS	DNAmGDF15AdjAge	CD4T	-0.272976	0.0361295	1.29092e-13	12.8891
1746	JHS	DNAmGDF15AdjAge	CD4T	-0.140106	0.0237095	4.12263e-09	8.38483
1430	InChianti	DNAmGDF15AdjAge	CD4T	-0.241657	0.0256785	1.89557e-20	19.7223
788	BLSA	DNAmGDF15AdjAge	CD4T	-0.207184	0.0348949	4.3447e-09	8.36204
692	LBC21	DNAmGDF15AdjAge	CD4T	-0.0346938	0.0380464	0.36215	0.441112
2796	LBC36	DNAmGDF15AdjAge	CD4T	-0.168549	0.0186478	2.89331e-19	18.5386
1402	NAS	DNAmGDF15AdjAge	CD4T	-0.129527	0.026501	1.13827e-06	5.94375
998	WHI BA23 White	DNAmGDF15AdjAge	CD4T	-0.212656	0.0309615	1.1416e-11	10.9425
676	WHI BA23 AfricanA	DNAmGDF15AdjAge	CD4T	-0.154871	0.0380538	5.26307e-05	4.27876
433	WHI BA23 Hispanic	DNAmGDF15AdjAge	CD4T	-0.198895	0.0472059	3.0661e-05	4.51341
11672	Meta	DNAmGDF15AdjAge	CD4T	-0.1747	0.00910759	5.25089e-82	81.2798
711	FHS	DNAmGDF15AdjAge	CD4.naive	-0.0864066	0.0374153	0.0212085	1.67349
1746	JHS	DNAmGDF15AdjAge	CD4.naive	-0.126717	0.0237526	1.0811e-07	6.96613
1430	InChianti	DNAmGDF15AdjAge	CD4.naive	-0.160085	0.0261215	1.14574e-09	8.94091
788	BLSA	DNAmGDF15AdjAge	CD4.naive	-0.156275	0.0352306	1.04813e-05	4.97958
692	LBC21	DNAmGDF15AdjAge	CD4.naive	-0.136782	0.0377115	0.0003078	3.51173
2796	LBC36	DNAmGDF15AdjAge	CD4.naive	-0.169724	0.018644	1.62317e-19	18.7896
1402	NAS	DNAmGDF15AdjAge	CD4.naive	0.00280446	0.026726	0.916443	0.0378943
998	WHI BA23 White	DNAmGDF15AdjAge	CD4.naive	-0.243452	0.0307329	6.24419e-15	14.2045
676	WHI BA23 AfricanA	DNAmGDF15AdjAge	CD4.naive	-0.312952	0.0365837	7.95762e-17	16.0992
433	WHI BA23 Hispanic	DNAmGDF15AdjAge	CD4.naive	-0.287269	0.046138	1.13468e-09	8.94513
11672	Meta	DNAmGDF15AdjAge	CD4.naive	-0.154315	0.00912348	3.54377e-64	63.4505
711	FHS	DNAmGDF15AdjAge	CD8.naive	-0.185368	0.0369049	6.44878e-07	6.19052
1746	JHS	DNAmGDF15AdjAge	CD8.naive	-0.141832	0.0237036	2.64315e-09	8.57788
1430	InChianti	DNAmGDF15AdjAge	CD8.naive	-0.0724274	0.0263933	0.00614261	2.21165
788	BLSA	DNAmGDF15AdjAge	CD8.naive	-0.239116	0.0346341	1.04232e-11	10.982
692	LBC21	DNAmGDF15AdjAge	CD8.naive	-0.366921	0.0354141	1.77119e-23	22.7517
2796	LBC36	DNAmGDF15AdjAge	CD8.naive	-0.289189	0.0181102	5.35337e-55	54.2714
1402	NAS	DNAmGDF15AdjAge	CD8.naive	-0.230011	0.0260095	2.7364e-18	17.5628
998	WHI BA23 White	DNAmGDF15AdjAge	CD8.naive	-0.230194	0.0308353	1.81096e-13	12.7421
676	WHI BA23 AfricanA	DNAmGDF15AdjAge	CD8.naive	-0.33542	0.0362871	3.08046e-19	18.5114
433	WHI BA23 Hispanic	DNAmGDF15AdjAge	CD8.naive	-0.334727	0.0453897	8.52437e-13	12.0693
11672	Meta	DNAmGDF15AdjAge	CD8.naive	-0.231005	0.0089787	5.6724e-146	145.246
711	FHS	DNAmGDF15AdjAge	CD8T	-0.00403816	0.0375555	0.914403	0.0388624
1746	JHS	DNAmGDF15AdjAge	CD8T	-0.0510936	0.0239144	0.0327757	1.48445
1430	InChianti	DNAmGDF15AdjAge	CD8T	-0.0023962	0.0264627	0.927863	0.0325162
788	BLSA	DNAmGDF15AdjAge	CD8T	-0.0666582	0.0355895	0.0614428	1.21153
692	LBC21	DNAmGDF15AdjAge	CD8T	0.0378807	0.038042	0.319716	0.495236
2796	LBC36	DNAmGDF15AdjAge	CD8T	-0.00065091	0.0189185	0.972556	0.0120854
1402	NAS	DNAmGDF15AdjAge	CD8T	0.149407	0.0264261	1.89979e-08	7.72129
998	WHI BA23 White	DNAmGDF15AdjAge	CD8T	0.0607166	0.0316278	0.0551779	1.25823
676	WHI BA23 AfricanA	DNAmGDF15AdjAge	CD8T	0.0188068	0.0385117	0.625468	0.203795
433	WHI BA23 Hispanic	DNAmGDF15AdjAge	CD8T	0.107343	0.04789	0.0255049	1.59338
11672	Meta	DNAmGDF15AdjAge	CD8T	0.0179655	0.00924421	0.0519642	1.2843
711	FHS	DNAmGDF15AdjAge	CD8.ex	0.280734	0.0360455	2.41463e-14	13.6171
1746	JHS	DNAmGDF15AdjAge	CD8.ex	0.118862	0.0237759	6.33305e-07	6.19839
1430	InChianti	DNAmGDF15AdjAge	CD8.ex	0.122708	0.0262628	3.25875e-06	5.48695
788	BLSA	DNAmGDF15AdjAge	CD8.ex	0.199244	0.0349537	1.69242e-08	7.77149
692	LBC21	DNAmGDF15AdjAge	CD8.ex	0.298838	0.0363297	9.65086e-16	15.0154
2796	LBC36	DNAmGDF15AdjAge	CD8.ex	0.297266	0.0180633	3.73707e-58	57.4275
1402	NAS	DNAmGDF15AdjAge	CD8.ex	0.228929	0.0260164	3.96751e-18	17.4015
998	WHI BA23 White	DNAmGDF15AdjAge	CD8.ex	0.211143	0.0309719	1.60582e-11	10.7943
676	WHI BA23 AfricanA	DNAmGDF15AdjAge	CD8.ex	0.21129	0.0376489	2.92093e-08	7.53448
433	WHI BA23 Hispanic	DNAmGDF15AdjAge	CD8.ex	0.211859	0.0470749	8.7353e-06	5.05872
11672	Meta	DNAmGDF15AdjAge	CD8.ex	0.220038	0.00901445	1.35706e-131	130.867
711	FHS	DNAmGDF15AdjAge	NK	-0.161003	0.0370658	1.60554e-05	4.79438
1746	JHS	DNAmGDF15AdjAge	NK	-0.0072491	0.023945	0.762125	0.117974
1430	InChianti	DNAmGDF15AdjAge	NK	-0.0519115	0.0264271	0.0496861	1.30376
788	BLSA	DNAmGDF15AdjAge	NK	0.00211275	0.0356687	0.952782	0.0210065
692	LBC21	DNAmGDF15AdjAge	NK	0.00849775	0.038068	0.823426	0.0843754
2796	LBC36	DNAmGDF15AdjAge	NK	0.0260902	0.0189121	0.167834	0.77512
1402	NAS	DNAmGDF15AdjAge	NK	0.0541536	0.0266869	0.042625	1.37034
998	WHI BA23 White	DNAmGDF15AdjAge	NK	0.00917641	0.0316849	0.772171	0.112286
676	WHI BA23 AfricanA	DNAmGDF15AdjAge	NK	0.0696246	0.0384251	0.0704379	1.15219
433	WHI BA23 Hispanic	DNAmGDF15AdjAge	NK	0.0845184	0.047996	0.0789563	1.10261
11672	Meta	DNAmGDF15AdjAge	NK	0.00387874	0.00925	0.67498	0.170709
711	FHS	DNAmGDF15AdjAge	PB	0.279137	0.036063	3.42422e-14	13.4654
1746	JHS	DNAmGDF15AdjAge	PB	0.0453618	0.023921	0.0580831	1.23595
1430	InChianti	DNAmGDF15AdjAge	PB	0.146305	0.0261781	2.73411e-08	7.56318
788	BLSA	DNAmGDF15AdjAge	PB	0.17162	0.0351396	1.25998e-06	5.89963
692	LBC21	DNAmGDF15AdjAge	PB	-0.136191	0.0377146	0.000327005	3.48545
2796	LBC36	DNAmGDF15AdjAge	PB	-0.0117644	0.0189172	0.534064	0.272407
1402	NAS	DNAmGDF15AdjAge	PB	-0.0106425	0.0267246	0.690523	0.160822
998	WHI BA23 White	DNAmGDF15AdjAge	PB	0.0950457	0.0315428	0.00265019	2.57672
676	WHI BA23 AfricanA	DNAmGDF15AdjAge	PB	0.0576544	0.0384545	0.134267	0.872032
433	WHI BA23 Hispanic	DNAmGDF15AdjAge	PB	0.0376198	0.0481342	0.434902	0.361608
11672	Meta	DNAmGDF15AdjAge	PB	0.0554095	0.00920726	1.76557e-09	8.75311
711	FHS	DNAmGDF15AdjAge	Mono	0.0144156	0.0375519	0.70118	0.154171
1746	JHS	DNAmGDF15AdjAge	Mono	0.0359242	0.0239302	0.133483	0.874574
1430	InChianti	DNAmGDF15AdjAge	Mono	0.0355461	0.0264461	0.17913	0.74683
788	BLSA	DNAmGDF15AdjAge	Mono	0.103927	0.0354757	0.00349298	2.4568
692	LBC21	DNAmGDF15AdjAge	Mono	0.192084	0.0373604	3.55627e-07	6.44901
2796	LBC36	DNAmGDF15AdjAge	Mono	0.114618	0.0187938	1.21702e-09	8.9147
1402	NAS	DNAmGDF15AdjAge	Mono	-0.000849758	0.0267261	0.97464	0.0111558
998	WHI BA23 White	DNAmGDF15AdjAge	Mono	0.00108357	0.0316862	0.972727	0.012009
676	WHI BA23 AfricanA	DNAmGDF15AdjAge	Mono	0.0446527	0.0384801	0.246293	0.608548
433	WHI BA23 Hispanic	DNAmGDF15AdjAge	Mono	-0.0215554	0.0481571	0.654662	0.183983
11672	Meta	DNAmGDF15AdjAge	Mono	0.058758	0.00923319	1.96846e-10	9.70587
711	FHS	DNAmGDF15AdjAge	Gran	0.335371	0.0353808	3.77137e-20	19.4235
1746	JHS	DNAmGDF15AdjAge	Gran	0.119035	0.0237754	6.09804e-07	6.21481
1430	InChianti	DNAmGDF15AdjAge	Gran	0.167624	0.0260884	1.78952e-10	9.74726
788	BLSA	DNAmGDF15AdjAge	Gran	0.156261	0.0352307	1.05015e-05	4.97875
692	LBC21	DNAmGDF15AdjAge	Gran	-0.0455163	0.0380299	0.231774	0.634936
2796	LBC36	DNAmGDF15AdjAge	Gran	0.0666719	0.0188764	0.000419069	3.37771
1402	NAS	DNAmGDF15AdjAge	Gran	-0.0299865	0.0267141	0.261844	0.581958
998	WHI BA23 White	DNAmGDF15AdjAge	Gran	0.139559	0.0313761	9.64587e-06	5.01566
676	WHI BA23 AfricanA	DNAmGDF15AdjAge	Gran	0.0863205	0.0383748	0.0248087	1.6054
433	WHI BA23 Hispanic	DNAmGDF15AdjAge	Gran	0.0818129	0.0480068	0.0890659	1.05029
11672	Meta	DNAmGDF15AdjAge	Gran	0.101103	0.00917826	3.21719e-28	27.4925
711	FHS	DNAmLeptinAdjAge	Bcell	0.149013	0.0371365	6.64427e-05	4.17755
1746	JHS	DNAmLeptinAdjAge	Bcell	0.158682	0.0236423	2.5917e-11	10.5864
1430	InChianti	DNAmLeptinAdjAge	Bcell	0.104697	0.0263174	7.29059e-05	4.13724
788	BLSA	DNAmLeptinAdjAge	Bcell	0.160836	0.0352045	5.69857e-06	5.24423
692	LBC21	DNAmLeptinAdjAge	Bcell	-0.00317392	0.0380692	0.93358	0.0298486
2796	LBC36	DNAmLeptinAdjAge	Bcell	0.0501115	0.0188947	0.00804353	2.09455
1402	NAS	DNAmLeptinAdjAge	Bcell	0.0420929	0.0267024	0.115167	0.938673
998	WHI BA23 White	DNAmLeptinAdjAge	Bcell	0.150604	0.0313248	1.76105e-06	5.75423
676	WHI BA23 AfricanA	DNAmLeptinAdjAge	Bcell	0.176968	0.0379106	3.66997e-06	5.43534
433	WHI BA23 Hispanic	DNAmLeptinAdjAge	Bcell	0.0869693	0.0479858	0.0706205	1.15107
11672	Meta	DNAmLeptinAdjAge	Bcell	0.100315	0.0092028	1.14695e-27	26.9405
711	FHS	DNAmLeptinAdjAge	CD4T	0.253402	0.03633	7.02279e-12	11.1535
1746	JHS	DNAmLeptinAdjAge	CD4T	0.19429	0.0234894	2.59474e-16	15.5859
1430	InChianti	DNAmLeptinAdjAge	CD4T	0.156702	0.0261359	2.56281e-09	8.59128
788	BLSA	DNAmLeptinAdjAge	CD4T	0.198648	0.034958	1.87005e-08	7.72815
692	LBC21	DNAmLeptinAdjAge	CD4T	0.0799388	0.0379475	0.035516	1.44958
2796	LBC36	DNAmLeptinAdjAge	CD4T	0.18143	0.0186045	4.06116e-22	21.3913
1402	NAS	DNAmLeptinAdjAge	CD4T	0.0903848	0.0266167	0.000703473	3.15275
998	WHI BA23 White	DNAmLeptinAdjAge	CD4T	0.103112	0.0315173	0.00110608	2.95621
676	WHI BA23 AfricanA	DNAmLeptinAdjAge	CD4T	0.188805	0.0378258	7.6383e-07	6.117
433	WHI BA23 Hispanic	DNAmLeptinAdjAge	CD4T	0.0407979	0.0481282	0.39708	0.401122
11672	Meta	DNAmLeptinAdjAge	CD4T	0.158262	0.00913453	3.01368e-67	66.5209
711	FHS	DNAmLeptinAdjAge	CD4.naive	0.201019	0.0367892	6.44684e-08	7.19065
1746	JHS	DNAmLeptinAdjAge	CD4.naive	0.202872	0.0234477	1.12733e-17	16.9479
1430	InChianti	DNAmLeptinAdjAge	CD4.naive	0.130179	0.0262376	7.83309e-07	6.10607
788	BLSA	DNAmLeptinAdjAge	CD4.naive	0.21376	0.0348444	1.35117e-09	8.86929
692	LBC21	DNAmLeptinAdjAge	CD4.naive	0.154011	0.0376151	4.73428e-05	4.32475
2796	LBC36	DNAmLeptinAdjAge	CD4.naive	0.151031	0.0187015	9.85568e-16	15.0063
1402	NAS	DNAmLeptinAdjAge	CD4.naive	-0.0577309	0.0266815	0.030656	1.51348
998	WHI BA23 White	DNAmLeptinAdjAge	CD4.naive	-0.102378	0.0315197	0.00120075	2.92055
676	WHI BA23 AfricanA	DNAmLeptinAdjAge	CD4.naive	-0.0578698	0.038454	0.132816	0.87675
433	WHI BA23 Hispanic	DNAmLeptinAdjAge	CD4.naive	-0.142542	0.0476764	0.00295162	2.52994
11672	Meta	DNAmLeptinAdjAge	CD4.naive	0.0953582	0.00915645	2.13328e-25	24.671
711	FHS	DNAmLeptinAdjAge	CD8.naive	0.0213608	0.0375472	0.569601	0.244429
1746	JHS	DNAmLeptinAdjAge	CD8.naive	0.0721824	0.0238832	0.00254508	2.5943
1430	InChianti	DNAmLeptinAdjAge	CD8.naive	0.181708	0.0260223	4.42067e-12	11.3545
788	BLSA	DNAmLeptinAdjAge	CD8.naive	0.0716877	0.035577	0.0442447	1.35414
692	LBC21	DNAmLeptinAdjAge	CD8.naive	0.169574	0.037518	7.28253e-06	5.13772
2796	LBC36	DNAmLeptinAdjAge	CD8.naive	0.0365749	0.0189058	0.0531423	1.27456
1402	NAS	DNAmLeptinAdjAge	CD8.naive	-0.0186116	0.0267215	0.486229	0.313159
998	WHI BA23 White	DNAmLeptinAdjAge	CD8.naive	-0.0756251	0.0315955	0.0168709	1.77286
676	WHI BA23 AfricanA	DNAmLeptinAdjAge	CD8.naive	-0.0836393	0.0383836	0.0296745	1.52762
433	WHI BA23 Hispanic	DNAmLeptinAdjAge	CD8.naive	-0.106385	0.047895	0.0268555	1.57097
11672	Meta	DNAmLeptinAdjAge	CD8.naive	0.041219	0.00922361	7.86362e-06	5.10438
711	FHS	DNAmLeptinAdjAge	CD8T	0.017319	0.0375502	0.644779	0.190589
1746	JHS	DNAmLeptinAdjAge	CD8T	0.0868302	0.0238552	0.000280711	3.55174
1430	InChianti	DNAmLeptinAdjAge	CD8T	-0.074142	0.02639	0.00502989	2.29844
788	BLSA	DNAmLeptinAdjAge	CD8T	0.151968	0.0352545	1.83492e-05	4.73638
692	LBC21	DNAmLeptinAdjAge	CD8T	0.0201371	0.0380616	0.596931	0.224076
2796	LBC36	DNAmLeptinAdjAge	CD8T	0.104554	0.0188148	3.00313e-08	7.52243
1402	NAS	DNAmLeptinAdjAge	CD8T	0.0122685	0.0267241	0.646247	0.189601
998	WHI BA23 White	DNAmLeptinAdjAge	CD8T	0.0163365	0.031682	0.60622	0.21737
676	WHI BA23 AfricanA	DNAmLeptinAdjAge	CD8T	-0.0173219	0.0385128	0.653021	0.185073
433	WHI BA23 Hispanic	DNAmLeptinAdjAge	CD8T	0.0377428	0.048134	0.433401	0.36311
11672	Meta	DNAmLeptinAdjAge	CD8T	0.0450339	0.00923538	1.08128e-06	5.96606
711	FHS	DNAmLeptinAdjAge	CD8.ex	-0.0573524	0.037494	0.126551	0.897733
1746	JHS	DNAmLeptinAdjAge	CD8.ex	-0.133192	0.0237323	2.31839e-08	7.63481
1430	InChianti	DNAmLeptinAdjAge	CD8.ex	-0.191222	0.0259745	3.04913e-13	12.5158
788	BLSA	DNAmLeptinAdjAge	CD8.ex	-0.061571	0.0356011	0.0841184	1.07511
692	LBC21	DNAmLeptinAdjAge	CD8.ex	-0.00760103	0.0380682	0.841799	0.0747918
2796	LBC36	DNAmLeptinAdjAge	CD8.ex	-0.00653482	0.0189181	0.729799	0.136796
1402	NAS	DNAmLeptinAdjAge	CD8.ex	-0.00305509	0.026726	0.909007	0.0414326
998	WHI BA23 White	DNAmLeptinAdjAge	CD8.ex	0.0284176	0.0316734	0.369826	0.432003
676	WHI BA23 AfricanA	DNAmLeptinAdjAge	CD8.ex	-0.0140648	0.0385148	0.715091	0.145638
433	WHI BA23 Hispanic	DNAmLeptinAdjAge	CD8.ex	0.0539244	0.0480982	0.262856	0.580281
11672	Meta	DNAmLeptinAdjAge	CD8.ex	-0.0506509	0.00922712	4.03405e-08	7.39426
711	FHS	DNAmLeptinAdjAge	NK	-0.0958639	0.0373828	0.0105408	1.97713
1746	JHS	DNAmLeptinAdjAge	NK	-0.0686069	0.0238892	0.00412973	2.38408
1430	InChianti	DNAmLeptinAdjAge	NK	-0.0872045	0.026362	0.000963153	3.0163
788	BLSA	DNAmLeptinAdjAge	NK	0.00638139	0.0356681	0.858054	0.0664852
692	LBC21	DNAmLeptinAdjAge	NK	-0.00631443	0.0380686	0.868308	0.0613262
2796	LBC36	DNAmLeptinAdjAge	NK	-0.0288256	0.0189106	0.127546	0.894334
1402	NAS	DNAmLeptinAdjAge	NK	0.105987	0.0265756	7.00364e-05	4.15468
998	WHI BA23 White	DNAmLeptinAdjAge	NK	0.212511	0.0309625	1.17984e-11	10.9282
676	WHI BA23 AfricanA	DNAmLeptinAdjAge	NK	0.193328	0.0377919	4.08215e-07	6.38911
433	WHI BA23 Hispanic	DNAmLeptinAdjAge	NK	0.136722	0.047716	0.00436952	2.35957
11672	Meta	DNAmLeptinAdjAge	NK	0.0146811	0.00921452	0.111102	0.954279
711	FHS	DNAmLeptinAdjAge	PB	-0.212946	0.0366944	9.80772e-09	8.00843
1746	JHS	DNAmLeptinAdjAge	PB	-0.209653	0.0234135	8.54361e-19	18.0684
1430	InChianti	DNAmLeptinAdjAge	PB	-0.102625	0.0263231	0.000101216	3.99475
788	BLSA	DNAmLeptinAdjAge	PB	-0.216095	0.0348261	8.84364e-10	9.05337
692	LBC21	DNAmLeptinAdjAge	PB	-0.025002	0.0380574	0.51143	0.291214
2796	LBC36	DNAmLeptinAdjAge	PB	-0.161891	0.0186689	7.09212e-18	17.1492
1402	NAS	DNAmLeptinAdjAge	PB	-0.103288	0.0265832	0.000106899	3.97103
998	WHI BA23 White	DNAmLeptinAdjAge	PB	-0.0648712	0.0316195	0.0404675	1.39289
676	WHI BA23 AfricanA	DNAmLeptinAdjAge	PB	-0.124101	0.0382208	0.00122434	2.9121
433	WHI BA23 Hispanic	DNAmLeptinAdjAge	PB	0.0133995	0.048164	0.780989	0.107355
11672	Meta	DNAmLeptinAdjAge	PB	-0.137429	0.00915733	6.55149e-51	50.1837
711	FHS	DNAmLeptinAdjAge	Mono	-0.24167	0.0364426	6.58946e-11	10.1812
1746	JHS	DNAmLeptinAdjAge	Mono	-0.148043	0.0236818	5.10458e-10	9.29204
1430	InChianti	DNAmLeptinAdjAge	Mono	-0.23522	0.0257203	1.98814e-19	18.7016
788	BLSA	DNAmLeptinAdjAge	Mono	-0.303518	0.0339862	2.95918e-18	17.5288
692	LBC21	DNAmLeptinAdjAge	Mono	-0.257722	0.0367833	5.82015e-12	11.2351
2796	LBC36	DNAmLeptinAdjAge	Mono	-0.172757	0.0186341	3.57629e-20	19.4466
1402	NAS	DNAmLeptinAdjAge	Mono	-0.0587935	0.0266799	0.0277104	1.55736
998	WHI BA23 White	DNAmLeptinAdjAge	Mono	-0.0927997	0.0315495	0.00334291	2.47587
676	WHI BA23 AfricanA	DNAmLeptinAdjAge	Mono	-0.059079	0.0384513	0.124894	0.903458
433	WHI BA23 Hispanic	DNAmLeptinAdjAge	Mono	-0.0637165	0.0480704	0.185713	0.731157
11672	Meta	DNAmLeptinAdjAge	Mono	-0.165599	0.00910933	7.55515e-74	73.1218
711	FHS	DNAmLeptinAdjAge	Gran	-0.107559	0.0373379	0.00408775	2.38852
1746	JHS	DNAmLeptinAdjAge	Gran	-0.149845	0.0236753	3.12669e-10	9.50491
1430	InChianti	DNAmLeptinAdjAge	Gran	0.00420236	0.0264626	0.873846	0.0585652
788	BLSA	DNAmLeptinAdjAge	Gran	-0.142121	0.0353068	6.24033e-05	4.20479
692	LBC21	DNAmLeptinAdjAge	Gran	0.0212096	0.0380608	0.577533	0.238424
2796	LBC36	DNAmLeptinAdjAge	Gran	-0.126334	0.0187669	2.02665e-11	10.6932
1402	NAS	DNAmLeptinAdjAge	Gran	-0.0941463	0.0266074	0.000415802	3.38111
998	WHI BA23 White	DNAmLeptinAdjAge	Gran	-0.0994577	0.0315291	0.00165606	2.78092
676	WHI BA23 AfricanA	DNAmLeptinAdjAge	Gran	-0.162438	0.038007	2.19779e-05	4.65801
433	WHI BA23 Hispanic	DNAmLeptinAdjAge	Gran	-0.0305766	0.0481458	0.525711	0.279253
11672	Meta	DNAmLeptinAdjAge	Gran	-0.0978729	0.00920444	2.08753e-26	25.6804
711	FHS	DNAmlogCRPAdjAge	Bcell	-0.156271	0.0370944	2.84778e-05	4.54549
1746	JHS	DNAmlogCRPAdjAge	Bcell	-0.265933	0.0230834	1.19366e-29	28.9231
1430	InChianti	DNAmlogCRPAdjAge	Bcell	-0.182032	0.0260207	4.04487e-12	11.3931
788	BLSA	DNAmlogCRPAdjAge	Bcell	-0.254427	0.034495	4.15479e-13	12.3815
692	LBC21	DNAmlogCRPAdjAge	Bcell	-0.219415	0.0371417	5.4542e-09	8.26327
2796	LBC36	DNAmlogCRPAdjAge	Bcell	-0.190831	0.0185708	2.44082e-24	23.6125
1402	NAS	DNAmlogCRPAdjAge	Bcell	-0.167004	0.026628	4.77526e-10	9.321
998	WHI BA23 White	DNAmlogCRPAdjAge	Bcell	-0.27615	0.0304541	6.31673e-19	18.1995
676	WHI BA23 AfricanA	DNAmlogCRPAdjAge	Bcell	-0.25128	0.0372827	3.40677e-11	10.4677
433	WHI BA23 Hispanic	DNAmlogCRPAdjAge	Bcell	-0.322678	0.0455917	5.98595e-12	11.2229
11672	Meta	DNAmlogCRPAdjAge	Bcell	-0.21881	0.00904085	2.09841e-129	128.678
711	FHS	DNAmlogCRPAdjAge	CD4T	-0.172506	0.0369928	3.72032e-06	5.42942
1746	JHS	DNAmlogCRPAdjAge	CD4T	-0.263666	0.0230983	3.70982e-29	28.4306
1430	InChianti	DNAmlogCRPAdjAge	CD4T	-0.261483	0.0255421	8.74445e-24	23.0583
788	BLSA	DNAmlogCRPAdjAge	CD4T	-0.265603	0.0343877	3.44078e-14	13.4633
692	LBC21	DNAmlogCRPAdjAge	CD4T	-0.251043	0.0368502	2.09046e-11	10.6798
2796	LBC36	DNAmlogCRPAdjAge	CD4T	-0.221301	0.0184494	2.32025e-32	31.6345
1402	NAS	DNAmlogCRPAdjAge	CD4T	-0.173117	0.0265995	1.06349e-10	9.97327
998	WHI BA23 White	DNAmlogCRPAdjAge	CD4T	-0.32229	0.0299955	1.48349e-25	24.8287
676	WHI BA23 AfricanA	DNAmlogCRPAdjAge	CD4T	-0.364704	0.0358655	1.07714e-22	21.9677
433	WHI BA23 Hispanic	DNAmlogCRPAdjAge	CD4T	-0.449952	0.0430168	5.69425e-23	22.2446
11672	Meta	DNAmlogCRPAdjAge	CD4T	-0.256812	0.00894412	2.63523e-181	180.579
711	FHS	DNAmlogCRPAdjAge	CD4.naive	-0.100713	0.0373648	0.00719701	2.14285
1746	JHS	DNAmlogCRPAdjAge	CD4.naive	-0.15468	0.0236575	8.14733e-11	10.089
1430	InChianti	DNAmlogCRPAdjAge	CD4.naive	-0.141968	0.0261948	6.99843e-08	7.155
788	BLSA	DNAmlogCRPAdjAge	CD4.naive	-0.159436	0.0352126	6.88334e-06	5.1622
692	LBC21	DNAmlogCRPAdjAge	CD4.naive	0.0238117	0.0380586	0.531746	0.274296
2796	LBC36	DNAmlogCRPAdjAge	CD4.naive	-0.0219993	0.0189139	0.244878	0.611051
1402	NAS	DNAmlogCRPAdjAge	CD4.naive	-0.135276	0.0267591	4.87719e-07	6.31183
998	WHI BA23 White	DNAmlogCRPAdjAge	CD4.naive	-0.276356	0.0304522	5.93706e-19	18.2264
676	WHI BA23 AfricanA	DNAmlogCRPAdjAge	CD4.naive	-0.295095	0.0368032	4.74944e-15	14.3234
433	WHI BA23 Hispanic	DNAmlogCRPAdjAge	CD4.naive	-0.351897	0.0450874	4.55902e-14	13.3411
11672	Meta	DNAmlogCRPAdjAge	CD4.naive	-0.134386	0.00914482	6.90887e-49	48.1606
711	FHS	DNAmlogCRPAdjAge	CD8.naive	-0.125815	0.0372574	0.000773014	3.11181
1746	JHS	DNAmlogCRPAdjAge	CD8.naive	-0.190507	0.0235071	9.88473e-16	15.005
1430	InChianti	DNAmlogCRPAdjAge	CD8.naive	-0.226624	0.0257743	4.11776e-18	17.3853
788	BLSA	DNAmlogCRPAdjAge	CD8.naive	-0.195074	0.0349836	3.38226e-08	7.47079
692	LBC21	DNAmlogCRPAdjAge	CD8.naive	0.109578	0.0378401	0.00390148	2.40877
2796	LBC36	DNAmlogCRPAdjAge	CD8.naive	0.0554356	0.0188894	0.00336542	2.47296
1402	NAS	DNAmlogCRPAdjAge	CD8.naive	-0.097253	0.0268793	0.00030751	3.51214
998	WHI BA23 White	DNAmlogCRPAdjAge	CD8.naive	-0.237952	0.0307761	2.58774e-14	13.5871
676	WHI BA23 AfricanA	DNAmlogCRPAdjAge	CD8.naive	-0.348016	0.0361107	1.11263e-20	19.9537
433	WHI BA23 Hispanic	DNAmlogCRPAdjAge	CD8.naive	-0.2449	0.0467015	2.46828e-07	6.60761
11672	Meta	DNAmlogCRPAdjAge	CD8.naive	-0.122229	0.00912159	6.04759e-41	40.2184
711	FHS	DNAmlogCRPAdjAge	CD8T	-0.182295	0.0369265	9.91438e-07	6.00373
1746	JHS	DNAmlogCRPAdjAge	CD8T	-0.209732	0.0234131	8.28655e-19	18.0816
1430	InChianti	DNAmlogCRPAdjAge	CD8T	-0.0863337	0.026364	0.00108315	2.96531
788	BLSA	DNAmlogCRPAdjAge	CD8T	-0.177514	0.0351023	5.30237e-07	6.27553
692	LBC21	DNAmlogCRPAdjAge	CD8T	-0.0405308	0.0380381	0.287007	0.542107
2796	LBC36	DNAmlogCRPAdjAge	CD8T	-0.0219663	0.0189139	0.245585	0.609797
1402	NAS	DNAmlogCRPAdjAge	CD8T	-0.160298	0.0266581	2.33017e-09	8.63261
998	WHI BA23 White	DNAmlogCRPAdjAge	CD8T	-0.192231	0.0310953	9.21988e-10	9.03527
676	WHI BA23 AfricanA	DNAmlogCRPAdjAge	CD8T	-0.280376	0.0369736	1.12154e-13	12.9502
433	WHI BA23 Hispanic	DNAmlogCRPAdjAge	CD8T	-0.221366	0.0469733	3.3058e-06	5.48072
11672	Meta	DNAmlogCRPAdjAge	CD8T	-0.13454	0.00915911	7.56204e-49	48.1214
711	FHS	DNAmlogCRPAdjAge	CD8.ex	0.12237	0.0372735	0.00107743	2.96761
1746	JHS	DNAmlogCRPAdjAge	CD8.ex	0.0968348	0.0238331	5.05895e-05	4.29594
1430	InChianti	DNAmlogCRPAdjAge	CD8.ex	0.128578	0.0262431	1.07033e-06	5.97048
788	BLSA	DNAmlogCRPAdjAge	CD8.ex	0.167318	0.035166	2.32718e-06	5.63317
692	LBC21	DNAmlogCRPAdjAge	CD8.ex	0.00874382	0.0380679	0.818401	0.0870341
2796	LBC36	DNAmlogCRPAdjAge	CD8.ex	0.0798687	0.0188581	2.35669e-05	4.6277
1402	NAS	DNAmlogCRPAdjAge	CD8.ex	0.0636812	0.0269525	0.0182803	1.73802
998	WHI BA23 White	DNAmlogCRPAdjAge	CD8.ex	0.15588	0.0312989	7.47799e-07	6.12621
676	WHI BA23 AfricanA	DNAmlogCRPAdjAge	CD8.ex	0.24954	0.0373	4.69172e-11	10.3287
433	WHI BA23 Hispanic	DNAmlogCRPAdjAge	CD8.ex	0.19507	0.047243	4.37465e-05	4.35906
11672	Meta	DNAmlogCRPAdjAge	CD8.ex	0.112197	0.00920297	3.45685e-34	33.4613
711	FHS	DNAmlogCRPAdjAge	NK	-0.277761	0.036078	4.61947e-14	13.3354
1746	JHS	DNAmlogCRPAdjAge	NK	-0.162292	0.0236282	8.9911e-12	11.0462
1430	InChianti	DNAmlogCRPAdjAge	NK	-0.240765	0.0256844	2.63657e-20	19.579
788	BLSA	DNAmlogCRPAdjAge	NK	-0.155709	0.0352338	1.1292e-05	4.94723
692	LBC21	DNAmlogCRPAdjAge	NK	-0.232123	0.0370295	6.4193e-10	9.19251
2796	LBC36	DNAmlogCRPAdjAge	NK	-0.19374	0.0185601	4.74555e-25	24.3237
1402	NAS	DNAmlogCRPAdjAge	NK	-0.257341	0.0260977	3.30954e-22	21.4802
998	WHI BA23 White	DNAmlogCRPAdjAge	NK	-0.177509	0.031183	1.64631e-08	7.78349
676	WHI BA23 AfricanA	DNAmlogCRPAdjAge	NK	-0.146169	0.0381049	0.000136808	3.86389
433	WHI BA23 Hispanic	DNAmlogCRPAdjAge	NK	-0.173967	0.0474338	0.000275473	3.55992
11672	Meta	DNAmlogCRPAdjAge	NK	-0.202964	0.00907483	8.52275e-111	110.069
711	FHS	DNAmlogCRPAdjAge	PB	0.239749	0.0364605	9.40264e-11	10.0268
1746	JHS	DNAmlogCRPAdjAge	PB	0.249452	0.0231887	3.54712e-26	25.4501
1430	InChianti	DNAmlogCRPAdjAge	PB	0.274302	0.0254478	4.2349e-26	25.3732
788	BLSA	DNAmlogCRPAdjAge	PB	0.266408	0.0343798	2.86243e-14	13.5433
692	LBC21	DNAmlogCRPAdjAge	PB	0.318813	0.0360828	8.1946e-18	17.0865
2796	LBC36	DNAmlogCRPAdjAge	PB	0.26297	0.0182526	1.90418e-45	44.7203
1402	NAS	DNAmlogCRPAdjAge	PB	0.298191	0.0257786	1.35639e-29	28.8676
998	WHI BA23 White	DNAmlogCRPAdjAge	PB	0.371046	0.0294243	6.23366e-34	33.2053
676	WHI BA23 AfricanA	DNAmlogCRPAdjAge	PB	0.387961	0.0355016	1.04902e-25	24.9792
433	WHI BA23 Hispanic	DNAmlogCRPAdjAge	PB	0.385247	0.0444504	9.06288e-17	16.0427
11672	Meta	DNAmlogCRPAdjAge	PB	0.291214	0.00886269	8.63921e-237	236.064
711	FHS	DNAmlogCRPAdjAge	Mono	0.0604476	0.0374871	0.1073	0.9694
1746	JHS	DNAmlogCRPAdjAge	Mono	0.14102	0.0237064	3.26069e-09	8.48669
1430	InChianti	DNAmlogCRPAdjAge	Mono	0.063695	0.0264091	0.0159968	1.79597
788	BLSA	DNAmlogCRPAdjAge	Mono	0.12174	0.0354035	0.000615442	3.21081
692	LBC21	DNAmlogCRPAdjAge	Mono	0.0133209	0.038066	0.726489	0.138771
2796	LBC36	DNAmlogCRPAdjAge	Mono	-0.0234265	0.0189133	0.215589	0.666373
1402	NAS	DNAmlogCRPAdjAge	Mono	0.168676	0.0266203	3.18412e-10	9.49701
998	WHI BA23 White	DNAmlogCRPAdjAge	Mono	0.0489437	0.0316482	0.122304	0.91256
676	WHI BA23 AfricanA	DNAmlogCRPAdjAge	Mono	0.188303	0.0378295	8.18114e-07	6.08719
433	WHI BA23 Hispanic	DNAmlogCRPAdjAge	Mono	0.145455	0.047656	0.00241229	2.61757
11672	Meta	DNAmlogCRPAdjAge	Mono	0.0772839	0.0092226	5.30009e-17	16.2757
711	FHS	DNAmlogCRPAdjAge	Gran	0.332817	0.0354148	7.50682e-20	19.1245
1746	JHS	DNAmlogCRPAdjAge	Gran	0.364125	0.0223018	7.09826e-56	55.1488
1430	InChianti	DNAmlogCRPAdjAge	Gran	0.352753	0.0247617	3.70564e-43	42.4311
788	BLSA	DNAmlogCRPAdjAge	Gran	0.36396	0.0332225	4.3239e-26	25.3641
692	LBC21	DNAmlogCRPAdjAge	Gran	0.353699	0.0356085	8.02785e-22	21.0954
2796	LBC36	DNAmlogCRPAdjAge	Gran	0.298263	0.0180574	1.49975e-58	57.824
1402	NAS	DNAmlogCRPAdjAge	Gran	0.355853	0.0252395	2.95631e-42	41.5293
998	WHI BA23 White	DNAmlogCRPAdjAge	Gran	0.440037	0.0284536	1.62477e-48	47.7892
676	WHI BA23 AfricanA	DNAmlogCRPAdjAge	Gran	0.444935	0.0344958	3.5434e-34	33.4506
433	WHI BA23 Hispanic	DNAmlogCRPAdjAge	Gran	0.495341	0.0418437	3.45987e-28	27.4609
11672	Meta	DNAmlogCRPAdjAge	Gran	0.361871	0.00863327	0	383.236
711	FHS	DNAmlogA1CAdjAge	Bcell	-0.165472	0.0370381	9.20336e-06	5.03605
1746	JHS	DNAmlogA1CAdjAge	Bcell	-0.115373	0.0237858	1.34103e-06	5.87256
1430	InChianti	DNAmlogA1CAdjAge	Bcell	-0.0155855	0.0264596	0.555935	0.254976
788	BLSA	DNAmlogA1CAdjAge	Bcell	-0.028457	0.0356544	0.425033	0.371577
692	LBC21	DNAmlogA1CAdjAge	Bcell	-0.0660072	0.0379863	0.0827176	1.0824
2796	LBC36	DNAmlogA1CAdjAge	Bcell	-0.0441371	0.0189001	0.0195989	1.70777
1402	NAS	DNAmlogA1CAdjAge	Bcell	-0.0337676	0.0269919	0.211137	0.675435
998	WHI BA23 White	DNAmlogA1CAdjAge	Bcell	-0.165038	0.0312517	1.57829e-07	6.80181
676	WHI BA23 AfricanA	DNAmlogA1CAdjAge	Bcell	-0.183162	0.0378669	1.63485e-06	5.78652
433	WHI BA23 Hispanic	DNAmlogA1CAdjAge	Bcell	-0.146214	0.0476506	0.00228744	2.64065
11672	Meta	DNAmlogA1CAdjAge	Bcell	-0.0805879	0.00922994	2.5213e-18	17.5984
711	FHS	DNAmlogA1CAdjAge	CD4T	0.0599737	0.0374882	0.110088	0.958261
1746	JHS	DNAmlogA1CAdjAge	CD4T	-0.0383001	0.0239281	0.109639	0.960035
1430	InChianti	DNAmlogA1CAdjAge	CD4T	0.0226949	0.026456	0.391127	0.407682
788	BLSA	DNAmlogA1CAdjAge	CD4T	0.0698711	0.0355816	0.0499188	1.30174
692	LBC21	DNAmlogA1CAdjAge	CD4T	-0.0572494	0.0380069	0.132451	0.877946
2796	LBC36	DNAmlogA1CAdjAge	CD4T	-0.0208205	0.0189144	0.27109	0.566886
1402	NAS	DNAmlogA1CAdjAge	CD4T	0.00193035	0.0270073	0.94303	0.0254744
998	WHI BA23 White	DNAmlogA1CAdjAge	CD4T	0.0143302	0.031683	0.651151	0.186318
676	WHI BA23 AfricanA	DNAmlogA1CAdjAge	CD4T	-0.0940835	0.0383477	0.0144022	1.84157
433	WHI BA23 Hispanic	DNAmlogA1CAdjAge	CD4T	-0.168569	0.047479	0.00042702	3.36955
11672	Meta	DNAmlogA1CAdjAge	CD4T	-0.0134079	0.00926282	0.147758	0.830449
711	FHS	DNAmlogA1CAdjAge	CD4.naive	0.071105	0.0374607	0.058086	1.23593
1746	JHS	DNAmlogA1CAdjAge	CD4.naive	-0.0268512	0.023937	0.262126	0.58149
1430	InChianti	DNAmlogA1CAdjAge	CD4.naive	-0.00262849	0.0264627	0.920892	0.0357914
788	BLSA	DNAmlogA1CAdjAge	CD4.naive	0.0237937	0.0356587	0.504801	0.29688
692	LBC21	DNAmlogA1CAdjAge	CD4.naive	0.0117599	0.0380667	0.757468	0.120636
2796	LBC36	DNAmlogA1CAdjAge	CD4.naive	-0.0357506	0.0189064	0.0587376	1.23108
1402	NAS	DNAmlogA1CAdjAge	CD4.naive	-0.00305783	0.0270072	0.909871	0.0410204
998	WHI BA23 White	DNAmlogA1CAdjAge	CD4.naive	0.0103398	0.0316845	0.744239	0.128287
676	WHI BA23 AfricanA	DNAmlogA1CAdjAge	CD4.naive	-0.0934036	0.0383502	0.0151276	1.82023
433	WHI BA23 Hispanic	DNAmlogA1CAdjAge	CD4.naive	-0.129248	0.0477643	0.0070811	2.1499
11672	Meta	DNAmlogA1CAdjAge	CD4.naive	-0.0160739	0.00926667	0.0828128	1.0819
711	FHS	DNAmlogA1CAdjAge	CD8.naive	-0.00928718	0.0375542	0.804747	0.0943407
1746	JHS	DNAmlogA1CAdjAge	CD8.naive	-0.0712	0.0238849	0.0029132	2.53563
1430	InChianti	DNAmlogA1CAdjAge	CD8.naive	-0.129	0.0262417	9.86117e-07	6.00607
788	BLSA	DNAmlogA1CAdjAge	CD8.naive	-0.0695546	0.0355824	0.0509673	1.29271
692	LBC21	DNAmlogA1CAdjAge	CD8.naive	0.0637001	0.037992	0.09406	1.02659
2796	LBC36	DNAmlogA1CAdjAge	CD8.naive	-0.0197145	0.0189148	0.297374	0.526696
1402	NAS	DNAmlogA1CAdjAge	CD8.naive	-0.0680853	0.0269446	0.0116204	1.93478
998	WHI BA23 White	DNAmlogA1CAdjAge	CD8.naive	-0.140945	0.0313699	7.84477e-06	5.10542
676	WHI BA23 AfricanA	DNAmlogA1CAdjAge	CD8.naive	-0.248888	0.0373065	5.28566e-11	10.2769
433	WHI BA23 Hispanic	DNAmlogA1CAdjAge	CD8.naive	-0.221935	0.0469671	3.11497e-06	5.50655
11672	Meta	DNAmlogA1CAdjAge	CD8.naive	-0.0766397	0.00922247	9.56137e-17	16.0195
711	FHS	DNAmlogA1CAdjAge	CD8T	-0.101961	0.0373601	0.00650736	2.18659
1746	JHS	DNAmlogA1CAdjAge	CD8T	-0.0117411	0.023944	0.623945	0.204854
1430	InChianti	DNAmlogA1CAdjAge	CD8T	0.0524317	0.0264264	0.0474398	1.32386
788	BLSA	DNAmlogA1CAdjAge	CD8T	-6.509e-05	0.0356688	0.998544	0.000632598
692	LBC21	DNAmlogA1CAdjAge	CD8T	-0.0254973	0.038057	0.503097	0.298348
2796	LBC36	DNAmlogA1CAdjAge	CD8T	0.0224856	0.0189137	0.234599	0.629674
1402	NAS	DNAmlogA1CAdjAge	CD8T	-0.0375211	0.0269883	0.164672	0.783381
998	WHI BA23 White	DNAmlogA1CAdjAge	CD8T	-0.0437816	0.0316558	0.166959	0.77739
676	WHI BA23 AfricanA	DNAmlogA1CAdjAge	CD8T	0.0291706	0.0385022	0.448935	0.347817
433	WHI BA23 Hispanic	DNAmlogA1CAdjAge	CD8T	0.0617704	0.0480763	0.199538	0.699974
11672	Meta	DNAmlogA1CAdjAge	CD8T	-0.00189397	0.00926778	0.838071	0.076719
711	FHS	DNAmlogA1CAdjAge	CD8.ex	-0.0125412	0.0375528	0.738507	0.131646
1746	JHS	DNAmlogA1CAdjAge	CD8.ex	0.0241753	0.0239387	0.31269	0.504886
1430	InChianti	DNAmlogA1CAdjAge	CD8.ex	-0.00116245	0.0264628	0.964968	0.0154871
788	BLSA	DNAmlogA1CAdjAge	CD8.ex	-0.0560556	0.0356127	0.115882	0.935983
692	LBC21	DNAmlogA1CAdjAge	CD8.ex	0.0337613	0.0380476	0.375204	0.425732
2796	LBC36	DNAmlogA1CAdjAge	CD8.ex	0.0270163	0.0189116	0.153244	0.814617
1402	NAS	DNAmlogA1CAdjAge	CD8.ex	-0.0253196	0.0269986	0.348507	0.457789
998	WHI BA23 White	DNAmlogA1CAdjAge	CD8.ex	0.0293672	0.0316725	0.354041	0.450947
676	WHI BA23 AfricanA	DNAmlogA1CAdjAge	CD8.ex	0.127987	0.0382018	0.0008523	3.06941
433	WHI BA23 Hispanic	DNAmlogA1CAdjAge	CD8.ex	0.0666755	0.0480611	0.166065	0.779721
11672	Meta	DNAmlogA1CAdjAge	CD8.ex	0.0169524	0.00926708	0.0673518	1.17165
711	FHS	DNAmlogA1CAdjAge	NK	-0.103248	0.0373551	0.00585864	2.2322
1746	JHS	DNAmlogA1CAdjAge	NK	-0.0129813	0.0239436	0.587777	0.230787
1430	InChianti	DNAmlogA1CAdjAge	NK	-0.0336448	0.0264478	0.203537	0.691356
788	BLSA	DNAmlogA1CAdjAge	NK	0.0425791	0.0356365	0.232518	0.633543
692	LBC21	DNAmlogA1CAdjAge	NK	0.0325493	0.0380492	0.392598	0.406052
2796	LBC36	DNAmlogA1CAdjAge	NK	-0.0306571	0.0189096	0.105078	0.97849
1402	NAS	DNAmlogA1CAdjAge	NK	-0.0481664	0.026976	0.074396	1.12845
998	WHI BA23 White	DNAmlogA1CAdjAge	NK	-0.0666202	0.0316158	0.0353515	1.45159
676	WHI BA23 AfricanA	DNAmlogA1CAdjAge	NK	0.0271059	0.0385044	0.481696	0.317227
433	WHI BA23 Hispanic	DNAmlogA1CAdjAge	NK	-0.114654	0.0478507	0.0169965	1.76964
11672	Meta	DNAmlogA1CAdjAge	NK	-0.0291035	0.00926434	0.00168112	2.7744
711	FHS	DNAmlogA1CAdjAge	PB	0.0910666	0.0373997	0.0151393	1.81989
1746	JHS	DNAmlogA1CAdjAge	PB	0.0699071	0.0238871	0.00347164	2.45947
1430	InChianti	DNAmlogA1CAdjAge	PB	0.043142	0.0264382	0.10294	0.987414
788	BLSA	DNAmlogA1CAdjAge	PB	-0.0339664	0.0356482	0.340973	0.46728
692	LBC21	DNAmlogA1CAdjAge	PB	0.107746	0.0378477	0.00454673	2.3423
2796	LBC36	DNAmlogA1CAdjAge	PB	0.0430238	0.018901	0.022905	1.64007
1402	NAS	DNAmlogA1CAdjAge	PB	0.0767663	0.0269276	0.00442571	2.35402
998	WHI BA23 White	DNAmlogA1CAdjAge	PB	0.0604818	0.0316282	0.0561277	1.25082
676	WHI BA23 AfricanA	DNAmlogA1CAdjAge	PB	0.0548454	0.0384606	0.154327	0.811558
433	WHI BA23 Hispanic	DNAmlogA1CAdjAge	PB	0.126623	0.0477806	0.00834297	2.07868
11672	Meta	DNAmlogA1CAdjAge	PB	0.0579981	0.00925482	3.68555e-10	9.4335
711	FHS	DNAmlogA1CAdjAge	Mono	0.00440703	0.0375554	0.906618	0.0425756
1746	JHS	DNAmlogA1CAdjAge	Mono	-0.00936646	0.0239446	0.695718	0.157567
1430	InChianti	DNAmlogA1CAdjAge	Mono	-0.0164907	0.0264592	0.533221	0.273093
788	BLSA	DNAmlogA1CAdjAge	Mono	0.0136626	0.0356655	0.701768	0.153807
692	LBC21	DNAmlogA1CAdjAge	Mono	-0.0582596	0.0380047	0.125744	0.900512
2796	LBC36	DNAmlogA1CAdjAge	Mono	-0.0308069	0.0189095	0.103389	0.985524
1402	NAS	DNAmlogA1CAdjAge	Mono	-0.0366035	0.0269892	0.17525	0.756342
998	WHI BA23 White	DNAmlogA1CAdjAge	Mono	-0.0185444	0.0316808	0.558443	0.253021
676	WHI BA23 AfricanA	DNAmlogA1CAdjAge	Mono	-0.0011343	0.0385185	0.976516	0.0103207
433	WHI BA23 Hispanic	DNAmlogA1CAdjAge	Mono	-0.00243071	0.0481682	0.959777	0.0178297
11672	Meta	DNAmlogA1CAdjAge	Mono	-0.0191781	0.00927243	0.0386129	1.41327
711	FHS	DNAmlogA1CAdjAge	Gran	0.113744	0.0373121	0.0023858	2.62237
1746	JHS	DNAmlogA1CAdjAge	Gran	0.0897147	0.0238491	0.000174292	3.75872
1430	InChianti	DNAmlogA1CAdjAge	Gran	0.00664246	0.0264622	0.801837	0.0959137
788	BLSA	DNAmlogA1CAdjAge	Gran	-0.0244346	0.0356582	0.493391	0.306809
692	LBC21	DNAmlogA1CAdjAge	Gran	0.0789971	0.0379504	0.037748	1.42311
2796	LBC36	DNAmlogA1CAdjAge	Gran	0.0122394	0.0189171	0.517685	0.285935
1402	NAS	DNAmlogA1CAdjAge	Gran	0.109746	0.0268442	4.59896e-05	4.33734
998	WHI BA23 White	DNAmlogA1CAdjAge	Gran	0.0764378	0.0315935	0.0157238	1.80344
676	WHI BA23 AfricanA	DNAmlogA1CAdjAge	Gran	0.0703133	0.0384232	0.0676963	1.16944
433	WHI BA23 Hispanic	DNAmlogA1CAdjAge	Gran	0.162326	0.0475295	0.00069755	3.15642
11672	Meta	DNAmlogA1CAdjAge	Gran	0.0570703	0.00924923	6.81723e-10	9.16639
711	FHS	DNAmPAI1AdjAge	Bcell	-0.288455	0.0359594	4.31734e-15	14.3648
1746	JHS	DNAmPAI1AdjAge	Bcell	-0.170722	0.0235941	6.90473e-13	12.1609
1430	InChianti	DNAmPAI1AdjAge	Bcell	-0.0924065	0.0263496	0.000467332	3.33037
788	BLSA	DNAmPAI1AdjAge	Bcell	-0.226659	0.0347405	1.22285e-10	9.91263
692	LBC21	DNAmPAI1AdjAge	Bcell	-0.10026	0.0378775	0.00830759	2.08052
2796	LBC36	DNAmPAI1AdjAge	Bcell	-0.160058	0.0186746	1.67181e-17	16.7768
1402	NAS	DNAmPAI1AdjAge	Bcell	-0.0690915	0.0266623	0.00965914	2.01506
998	WHI BA23 White	DNAmPAI1AdjAge	Bcell	-0.0517243	0.0316438	0.102453	0.989474
676	WHI BA23 AfricanA	DNAmPAI1AdjAge	Bcell	-0.0503266	0.0384698	0.191247	0.718405
433	WHI BA23 Hispanic	DNAmPAI1AdjAge	Bcell	-0.0328319	0.0481423	0.495621	0.30485
11672	Meta	DNAmPAI1AdjAge	Bcell	-0.132306	0.00916098	2.80024e-47	46.5528
711	FHS	DNAmPAI1AdjAge	CD4T	-0.091996	0.0373965	0.0141307	1.84984
1746	JHS	DNAmPAI1AdjAge	CD4T	-0.122349	0.0237658	2.92861e-07	6.53334
1430	InChianti	DNAmPAI1AdjAge	CD4T	-0.101256	0.0263268	0.000125293	3.90207
788	BLSA	DNAmPAI1AdjAge	CD4T	-0.0884563	0.035529	0.012991	1.88636
692	LBC21	DNAmPAI1AdjAge	CD4T	-0.108253	0.0378456	0.00435923	2.36059
2796	LBC36	DNAmPAI1AdjAge	CD4T	-0.120338	0.018781	1.73093e-10	9.76172
1402	NAS	DNAmPAI1AdjAge	CD4T	0.0012223	0.0267261	0.963528	0.0161355
998	WHI BA23 White	DNAmPAI1AdjAge	CD4T	-0.0634177	0.0316224	0.0451834	1.34502
676	WHI BA23 AfricanA	DNAmPAI1AdjAge	CD4T	-0.115218	0.038262	0.00269872	2.56884
433	WHI BA23 Hispanic	DNAmPAI1AdjAge	CD4T	-0.0905269	0.0479705	0.0598139	1.2232
11672	Meta	DNAmPAI1AdjAge	CD4T	-0.0930269	0.00921691	5.92837e-24	23.2271
711	FHS	DNAmPAI1AdjAge	CD4.naive	0.00439399	0.0375554	0.906893	0.042444
1746	JHS	DNAmPAI1AdjAge	CD4.naive	-0.0779301	0.0238728	0.00111827	2.95145
1430	InChianti	DNAmPAI1AdjAge	CD4.naive	-0.0195141	0.0264578	0.460905	0.336388
788	BLSA	DNAmPAI1AdjAge	CD4.naive	-0.0705549	0.0355799	0.0477155	1.32134
692	LBC21	DNAmPAI1AdjAge	CD4.naive	-0.0301113	0.0380521	0.42903	0.367512
2796	LBC36	DNAmPAI1AdjAge	CD4.naive	-0.0536379	0.0188913	0.00455403	2.3416
1402	NAS	DNAmPAI1AdjAge	CD4.naive	0.0785116	0.0266436	0.00326466	2.48616
998	WHI BA23 White	DNAmPAI1AdjAge	CD4.naive	-0.0590099	0.031631	0.062395	1.20485
676	WHI BA23 AfricanA	DNAmPAI1AdjAge	CD4.naive	-0.0903274	0.0383611	0.0188254	1.72525
433	WHI BA23 Hispanic	DNAmPAI1AdjAge	CD4.naive	-0.0763916	0.0480276	0.112438	0.949089
11672	Meta	DNAmPAI1AdjAge	CD4.naive	-0.0368678	0.00924656	6.68596e-05	4.17484
711	FHS	DNAmPAI1AdjAge	CD8.naive	-0.00363903	0.0375555	0.922835	0.0348758
1746	JHS	DNAmPAI1AdjAge	CD8.naive	-0.0683709	0.0238896	0.00426065	2.37052
1430	InChianti	DNAmPAI1AdjAge	CD8.naive	-0.0626823	0.0264108	0.0177587	1.75059
788	BLSA	DNAmPAI1AdjAge	CD8.naive	-0.103121	0.0354787	0.00375699	2.42516
692	LBC21	DNAmPAI1AdjAge	CD8.naive	-0.0611838	0.037998	0.107815	0.96732
2796	LBC36	DNAmPAI1AdjAge	CD8.naive	-0.0371771	0.0189054	0.0493425	1.30678
1402	NAS	DNAmPAI1AdjAge	CD8.naive	-0.0475864	0.0266958	0.0748782	1.12564
998	WHI BA23 White	DNAmPAI1AdjAge	CD8.naive	-0.0724741	0.0316029	0.0220397	1.65679
676	WHI BA23 AfricanA	DNAmPAI1AdjAge	CD8.naive	-0.176468	0.0379141	3.91319e-06	5.40747
433	WHI BA23 Hispanic	DNAmPAI1AdjAge	CD8.naive	-0.0334025	0.0481414	0.488155	0.311442
11672	Meta	DNAmPAI1AdjAge	CD8.naive	-0.0612288	0.00924053	3.44634e-11	10.4626
711	FHS	DNAmPAI1AdjAge	CD8T	-0.0902459	0.0374025	0.0160821	1.79366
1746	JHS	DNAmPAI1AdjAge	CD8T	-0.0579383	0.0239054	0.0154668	1.8106
1430	InChianti	DNAmPAI1AdjAge	CD8T	-0.123688	0.0262596	2.7158e-06	5.5661
788	BLSA	DNAmPAI1AdjAge	CD8T	-0.14279	0.0353033	5.75653e-05	4.23984
692	LBC21	DNAmPAI1AdjAge	CD8T	-0.108506	0.0378446	0.00426832	2.36974
2796	LBC36	DNAmPAI1AdjAge	CD8T	-0.0287364	0.0189107	0.128728	0.890326
1402	NAS	DNAmPAI1AdjAge	CD8T	-0.0462992	0.0266975	0.0830994	1.0804
998	WHI BA23 White	DNAmPAI1AdjAge	CD8T	-0.0852887	0.0315708	0.00701977	2.15368
676	WHI BA23 AfricanA	DNAmPAI1AdjAge	CD8T	-0.0974577	0.0383352	0.0112368	1.94936
433	WHI BA23 Hispanic	DNAmPAI1AdjAge	CD8T	-0.0859428	0.0479901	0.0740197	1.13065
11672	Meta	DNAmPAI1AdjAge	CD8T	-0.0741609	0.00923209	9.51559e-16	15.0216
711	FHS	DNAmPAI1AdjAge	CD8.ex	0.125061	0.0372609	0.000831883	3.07994
1746	JHS	DNAmPAI1AdjAge	CD8.ex	0.103805	0.0238163	1.38543e-05	4.85841
1430	InChianti	DNAmPAI1AdjAge	CD8.ex	0.0981891	0.0263349	0.000200174	3.69859
788	BLSA	DNAmPAI1AdjAge	CD8.ex	0.115502	0.0354301	0.00116206	2.93477
692	LBC21	DNAmPAI1AdjAge	CD8.ex	0.114594	0.0378186	0.00253608	2.59584
2796	LBC36	DNAmPAI1AdjAge	CD8.ex	0.111992	0.0187995	2.88784e-09	8.53943
1402	NAS	DNAmPAI1AdjAge	CD8.ex	0.0392557	0.0267055	0.141801	0.84832
998	WHI BA23 White	DNAmPAI1AdjAge	CD8.ex	0.0427204	0.0316573	0.177495	0.750815
676	WHI BA23 AfricanA	DNAmPAI1AdjAge	CD8.ex	0.139389	0.0381425	0.000277788	3.55629
433	WHI BA23 Hispanic	DNAmPAI1AdjAge	CD8.ex	0.0440743	0.0481215	0.360234	0.443416
11672	Meta	DNAmPAI1AdjAge	CD8.ex	0.0948365	0.00921761	7.93064e-25	24.1007
711	FHS	DNAmPAI1AdjAge	NK	-0.0752238	0.0374494	0.0449498	1.34727
1746	JHS	DNAmPAI1AdjAge	NK	-0.0189698	0.0239413	0.428267	0.368286
1430	InChianti	DNAmPAI1AdjAge	NK	-0.0466754	0.026434	0.0776539	1.10984
788	BLSA	DNAmPAI1AdjAge	NK	-0.0313427	0.0356513	0.379591	0.420684
692	LBC21	DNAmPAI1AdjAge	NK	0.000150132	0.0380693	0.996855	0.00136819
2796	LBC36	DNAmPAI1AdjAge	NK	0.0211041	0.0189143	0.264614	0.577388
1402	NAS	DNAmPAI1AdjAge	NK	-0.0910132	0.0266152	0.000645169	3.19033
998	WHI BA23 White	DNAmPAI1AdjAge	NK	-0.0159314	0.0316822	0.615181	0.210997
676	WHI BA23 AfricanA	DNAmPAI1AdjAge	NK	0.0319369	0.0384989	0.407085	0.390315
433	WHI BA23 Hispanic	DNAmPAI1AdjAge	NK	-0.0461982	0.0481169	0.33753	0.471687
11672	Meta	DNAmPAI1AdjAge	NK	-0.0224281	0.00925476	0.0153753	1.81318
711	FHS	DNAmPAI1AdjAge	PB	0.225751	0.0365863	1.14526e-09	8.94109
1746	JHS	DNAmPAI1AdjAge	PB	0.155587	0.0236541	6.3006e-11	10.2006
1430	InChianti	DNAmPAI1AdjAge	PB	0.15824	0.0261294	1.78119e-09	8.74929
788	BLSA	DNAmPAI1AdjAge	PB	0.172622	0.0351334	1.08989e-06	5.96262
692	LBC21	DNAmPAI1AdjAge	PB	0.135145	0.0377201	0.000363802	3.43914
2796	LBC36	DNAmPAI1AdjAge	PB	0.151903	0.018699	6.71988e-16	15.1726
1402	NAS	DNAmPAI1AdjAge	PB	0.0254009	0.0267175	0.341911	0.466087
998	WHI BA23 White	DNAmPAI1AdjAge	PB	0.161974	0.0312678	2.68201e-07	6.57154
676	WHI BA23 AfricanA	DNAmPAI1AdjAge	PB	0.144441	0.0381146	0.000164359	3.78421
433	WHI BA23 Hispanic	DNAmPAI1AdjAge	PB	0.200054	0.0471946	2.74936e-05	4.56077
11672	Meta	DNAmPAI1AdjAge	PB	0.145669	0.00915428	5.17791e-57	56.2858
711	FHS	DNAmPAI1AdjAge	Mono	0.132903	0.0372226	0.000380352	3.41981
1746	JHS	DNAmPAI1AdjAge	Mono	0.0885917	0.0238515	0.000210177	3.67741
1430	InChianti	DNAmPAI1AdjAge	Mono	0.116424	0.0262828	1.01578e-05	4.9932
788	BLSA	DNAmPAI1AdjAge	Mono	0.159987	0.0352094	6.39082e-06	5.19444
692	LBC21	DNAmPAI1AdjAge	Mono	0.119674	0.0377958	0.00161176	2.7927
2796	LBC36	DNAmPAI1AdjAge	Mono	0.146108	0.0187155	8.22903e-15	14.0847
1402	NAS	DNAmPAI1AdjAge	Mono	0.0548534	0.0266859	0.0400137	1.39779
998	WHI BA23 White	DNAmPAI1AdjAge	Mono	-0.0760154	0.0315945	0.0163111	1.78752
676	WHI BA23 AfricanA	DNAmPAI1AdjAge	Mono	0.00297905	0.0385184	0.938375	0.0276234
433	WHI BA23 Hispanic	DNAmPAI1AdjAge	Mono	-0.00773393	0.0481669	0.872511	0.0592291
11672	Meta	DNAmPAI1AdjAge	Mono	0.0889584	0.00920581	4.31796e-22	21.3647
711	FHS	DNAmPAI1AdjAge	Gran	0.215962	0.0366695	5.98498e-09	8.22294
1746	JHS	DNAmPAI1AdjAge	Gran	0.146133	0.0236886	8.52848e-10	9.06913
1430	InChianti	DNAmPAI1AdjAge	Gran	0.142067	0.0261944	6.85218e-08	7.16417
788	BLSA	DNAmPAI1AdjAge	Gran	0.163825	0.0351869	3.7866e-06	5.42175
692	LBC21	DNAmPAI1AdjAge	Gran	0.103629	0.0378644	0.00636304	2.19634
2796	LBC36	DNAmPAI1AdjAge	Gran	0.120724	0.0187801	1.51236e-10	9.82035
1402	NAS	DNAmPAI1AdjAge	Gran	0.0567282	0.0266831	0.033678	1.47265
998	WHI BA23 White	DNAmPAI1AdjAge	Gran	0.186335	0.0311313	3.00774e-09	8.52176
676	WHI BA23 AfricanA	DNAmPAI1AdjAge	Gran	0.167061	0.0379772	1.26391e-05	4.89828
433	WHI BA23 Hispanic	DNAmPAI1AdjAge	Gran	0.188429	0.0473055	7.97969e-05	4.09801
11672	Meta	DNAmPAI1AdjAge	Gran	0.138396	0.0091669	1.68612e-51	50.7731
711	FHS	DNAmTIMP1AdjAge	Bcell	-0.390933	0.0345671	2.22259e-27	26.6531
1746	JHS	DNAmTIMP1AdjAge	Bcell	-0.204296	0.0234406	6.60679e-18	17.18
1430	InChianti	DNAmTIMP1AdjAge	Bcell	-0.344586	0.0248421	3.88455e-41	40.4107
788	BLSA	DNAmTIMP1AdjAge	Bcell	-0.261243	0.0344301	9.22244e-14	13.0352
692	LBC21	DNAmTIMP1AdjAge	Bcell	-0.193689	0.0373484	2.82655e-07	6.54874
2796	LBC36	DNAmTIMP1AdjAge	Bcell	-0.315937	0.0179495	7.56289e-66	65.1213
1402	NAS	DNAmTIMP1AdjAge	Bcell	-0.259811	0.0258083	4.60824e-23	22.3365
998	WHI BA23 White	DNAmTIMP1AdjAge	Bcell	-0.280025	0.0304185	1.94707e-19	18.7106
676	WHI BA23 AfricanA	DNAmTIMP1AdjAge	Bcell	-0.151648	0.0380731	7.54324e-05	4.12244
433	WHI BA23 Hispanic	DNAmTIMP1AdjAge	Bcell	-0.324262	0.0455656	4.65581e-12	11.332
11672	Meta	DNAmTIMP1AdjAge	Bcell	-0.279689	0.00887526	5.7089e-218	217.243
711	FHS	DNAmTIMP1AdjAge	CD4T	-0.335544	0.0353785	3.59886e-20	19.4438
1746	JHS	DNAmTIMP1AdjAge	CD4T	-0.233962	0.0232811	3.88267e-23	22.4109
1430	InChianti	DNAmTIMP1AdjAge	CD4T	-0.372993	0.0245531	1.98911e-48	47.7013
788	BLSA	DNAmTIMP1AdjAge	CD4T	-0.285338	0.034186	3.14884e-16	15.5018
692	LBC21	DNAmTIMP1AdjAge	CD4T	-0.244365	0.0369152	7.23751e-11	10.1404
2796	LBC36	DNAmTIMP1AdjAge	CD4T	-0.30338	0.0180269	1.30326e-60	59.885
1402	NAS	DNAmTIMP1AdjAge	CD4T	-0.214342	0.026105	4.93946e-16	15.3063
998	WHI BA23 White	DNAmTIMP1AdjAge	CD4T	-0.286657	0.0303564	2.48694e-20	19.6043
676	WHI BA23 AfricanA	DNAmTIMP1AdjAge	CD4T	-0.242644	0.0373675	1.62837e-10	9.78825
433	WHI BA23 Hispanic	DNAmTIMP1AdjAge	CD4T	-0.437746	0.043308	1.07156e-21	20.97
11672	Meta	DNAmTIMP1AdjAge	CD4T	-0.290358	0.00884874	3.78695e-236	235.422
711	FHS	DNAmTIMP1AdjAge	CD4.naive	-0.133351	0.0372204	0.000363258	3.43978
1746	JHS	DNAmTIMP1AdjAge	CD4.naive	-0.123982	0.0237609	2.02558e-07	6.69345
1430	InChianti	DNAmTIMP1AdjAge	CD4.naive	-0.169668	0.0260791	1.06588e-10	9.97229
788	BLSA	DNAmTIMP1AdjAge	CD4.naive	-0.185092	0.0350525	1.66963e-07	6.77738
692	LBC21	DNAmTIMP1AdjAge	CD4.naive	0.0093973	0.0380677	0.805092	0.0941547
2796	LBC36	DNAmTIMP1AdjAge	CD4.naive	0.0162866	0.018916	0.389315	0.409699
1402	NAS	DNAmTIMP1AdjAge	CD4.naive	-0.118657	0.0265373	8.40154e-06	5.07564
998	WHI BA23 White	DNAmTIMP1AdjAge	CD4.naive	-0.144402	0.0313541	4.64672e-06	5.33285
676	WHI BA23 AfricanA	DNAmTIMP1AdjAge	CD4.naive	-0.100704	0.0383228	0.00879006	2.05601
433	WHI BA23 Hispanic	DNAmTIMP1AdjAge	CD4.naive	-0.247858	0.0466653	1.74689e-07	6.75773
11672	Meta	DNAmTIMP1AdjAge	CD4.naive	-0.0981245	0.00919042	1.30657e-26	25.8839
711	FHS	DNAmTIMP1AdjAge	CD8.naive	-0.062398	0.0374826	0.0964108	1.01587
1746	JHS	DNAmTIMP1AdjAge	CD8.naive	-0.0985972	0.023829	3.67515e-05	4.43472
1430	InChianti	DNAmTIMP1AdjAge	CD8.naive	-0.0856897	0.0263655	0.00118063	2.92789
788	BLSA	DNAmTIMP1AdjAge	CD8.naive	-0.115811	0.0354288	0.00112684	2.94814
692	LBC21	DNAmTIMP1AdjAge	CD8.naive	0.0224874	0.0380597	0.554818	0.255849
2796	LBC36	DNAmTIMP1AdjAge	CD8.naive	0.0833487	0.0188527	1.01969e-05	4.99153
1402	NAS	DNAmTIMP1AdjAge	CD8.naive	-0.0359511	0.0267088	0.178509	0.74834
998	WHI BA23 White	DNAmTIMP1AdjAge	CD8.naive	-0.185451	0.0311366	3.57936e-09	8.4462
676	WHI BA23 AfricanA	DNAmTIMP1AdjAge	CD8.naive	-0.145241	0.0381101	0.000151021	3.82096
433	WHI BA23 Hispanic	DNAmTIMP1AdjAge	CD8.naive	-0.189165	0.0472986	7.47252e-05	4.12653
11672	Meta	DNAmTIMP1AdjAge	CD8.naive	-0.0517623	0.00921323	1.92896e-08	7.71468
711	FHS	DNAmTIMP1AdjAge	CD8T	-0.165724	0.0370365	8.91529e-06	5.04986
1746	JHS	DNAmTIMP1AdjAge	CD8T	-0.148906	0.0236787	4.03978e-10	9.39364
1430	InChianti	DNAmTIMP1AdjAge	CD8T	-0.15866	0.0261276	1.61141e-09	8.79279
788	BLSA	DNAmTIMP1AdjAge	CD8T	-0.216891	0.0348198	7.64468e-10	9.11664
692	LBC21	DNAmTIMP1AdjAge	CD8T	-0.00939725	0.0380677	0.805093	0.0941541
2796	LBC36	DNAmTIMP1AdjAge	CD8T	-0.00165304	0.0189185	0.930378	0.0313405
1402	NAS	DNAmTIMP1AdjAge	CD8T	-0.196332	0.026206	1.19736e-13	12.9218
998	WHI BA23 White	DNAmTIMP1AdjAge	CD8T	-0.145558	0.0313487	3.88953e-06	5.4101
676	WHI BA23 AfricanA	DNAmTIMP1AdjAge	CD8T	-0.117923	0.0382498	0.00213307	2.671
433	WHI BA23 Hispanic	DNAmTIMP1AdjAge	CD8T	-0.0685128	0.0480551	0.154675	0.81058
11672	Meta	DNAmTIMP1AdjAge	CD8T	-0.113929	0.00917604	2.1428e-35	34.669
711	FHS	DNAmTIMP1AdjAge	CD8.ex	0.210706	0.0367126	1.40884e-08	7.85114
1746	JHS	DNAmTIMP1AdjAge	CD8.ex	0.131555	0.0237375	3.44624e-08	7.46265
1430	InChianti	DNAmTIMP1AdjAge	CD8.ex	0.0897256	0.0263561	0.000681564	3.16649
788	BLSA	DNAmTIMP1AdjAge	CD8.ex	0.139961	0.0353177	8.07755e-05	4.09272
692	LBC21	DNAmTIMP1AdjAge	CD8.ex	-0.00687626	0.0380684	0.856712	0.0671652
2796	LBC36	DNAmTIMP1AdjAge	CD8.ex	0.085769	0.0188488	5.58375e-06	5.25307
1402	NAS	DNAmTIMP1AdjAge	CD8.ex	0.119524	0.0265345	7.20761e-06	5.14221
998	WHI BA23 White	DNAmTIMP1AdjAge	CD8.ex	0.148353	0.0313356	2.516e-06	5.59929
676	WHI BA23 AfricanA	DNAmTIMP1AdjAge	CD8.ex	0.141439	0.0381313	0.000224979	3.64786
433	WHI BA23 Hispanic	DNAmTIMP1AdjAge	CD8.ex	0.201551	0.0471798	2.38591e-05	4.62235
11672	Meta	DNAmTIMP1AdjAge	CD8.ex	0.116275	0.0091908	1.10061e-36	35.9584
711	FHS	DNAmTIMP1AdjAge	NK	-0.198397	0.0368092	9.6085e-08	7.01734
1746	JHS	DNAmTIMP1AdjAge	NK	-0.0783517	0.023872	0.00105053	2.97859
1430	InChianti	DNAmTIMP1AdjAge	NK	-0.160387	0.0261202	1.06518e-09	8.97258
788	BLSA	DNAmTIMP1AdjAge	NK	-0.0508739	0.0356226	0.15365	0.813466
692	LBC21	DNAmTIMP1AdjAge	NK	-0.226763	0.0370776	1.60765e-09	8.79381
2796	LBC36	DNAmTIMP1AdjAge	NK	-0.105168	0.0188136	2.4897e-08	7.60385
1402	NAS	DNAmTIMP1AdjAge	NK	-0.201249	0.0261793	2.8128e-14	13.5509
998	WHI BA23 White	DNAmTIMP1AdjAge	NK	-0.12434	0.0314403	8.20227e-05	4.08607
676	WHI BA23 AfricanA	DNAmTIMP1AdjAge	NK	-0.0999294	0.0383258	0.00932601	2.0303
433	WHI BA23 Hispanic	DNAmTIMP1AdjAge	NK	-0.146491	0.0476487	0.00224334	2.64911
11672	Meta	DNAmTIMP1AdjAge	NK	-0.132295	0.00917037	3.53383e-47	46.4518
711	FHS	DNAmTIMP1AdjAge	PB	0.418895	0.034102	1.4002e-31	30.8538
1746	JHS	DNAmTIMP1AdjAge	PB	0.221863	0.0233489	6.52801e-21	20.1852
1430	InChianti	DNAmTIMP1AdjAge	PB	0.399218	0.0242626	7.7196e-56	55.1124
788	BLSA	DNAmTIMP1AdjAge	PB	0.305385	0.0339649	1.79792e-18	17.7452
692	LBC21	DNAmTIMP1AdjAge	PB	0.334521	0.0358761	1.48501e-19	18.8283
2796	LBC36	DNAmTIMP1AdjAge	PB	0.417788	0.0171883	1.50135e-118	117.824
1402	NAS	DNAmTIMP1AdjAge	PB	0.377463	0.024749	1.05095e-48	47.9784
998	WHI BA23 White	DNAmTIMP1AdjAge	PB	0.392823	0.0291391	3.60874e-38	37.4426
676	WHI BA23 AfricanA	DNAmTIMP1AdjAge	PB	0.283542	0.0369377	5.77035e-14	13.2388
433	WHI BA23 Hispanic	DNAmTIMP1AdjAge	PB	0.37237	0.0447042	1.09053e-15	14.9624
11672	Meta	DNAmTIMP1AdjAge	PB	0.360718	0.00861776	0	382.173
711	FHS	DNAmTIMP1AdjAge	Mono	0.115998	0.0373023	0.00194792	2.71043
1746	JHS	DNAmTIMP1AdjAge	Mono	0.0862546	0.0238564	0.0003082	3.51117
1430	InChianti	DNAmTIMP1AdjAge	Mono	0.0863382	0.026364	0.0010825	2.96557
788	BLSA	DNAmTIMP1AdjAge	Mono	0.192501	0.0350017	5.1455e-08	7.28857
692	LBC21	DNAmTIMP1AdjAge	Mono	0.0364347	0.0380441	0.338551	0.470376
2796	LBC36	DNAmTIMP1AdjAge	Mono	0.0289352	0.0189106	0.126104	0.899272
1402	NAS	DNAmTIMP1AdjAge	Mono	0.0914015	0.0266143	0.000611425	3.21366
998	WHI BA23 White	DNAmTIMP1AdjAge	Mono	0.0384387	0.0316628	0.225034	0.647752
676	WHI BA23 AfricanA	DNAmTIMP1AdjAge	Mono	0.063089	0.0384418	0.101232	0.994683
433	WHI BA23 Hispanic	DNAmTIMP1AdjAge	Mono	0.111962	0.0478654	0.0197859	1.70364
11672	Meta	DNAmTIMP1AdjAge	Mono	0.075065	0.00922908	4.16969e-16	15.3799
711	FHS	DNAmTIMP1AdjAge	Gran	0.47972	0.0329523	3.37349e-42	41.4719
1746	JHS	DNAmTIMP1AdjAge	Gran	0.281188	0.0229795	4.32816e-33	32.3637
1430	InChianti	DNAmTIMP1AdjAge	Gran	0.428871	0.0239056	4.61501e-65	64.3358
788	BLSA	DNAmTIMP1AdjAge	Gran	0.331919	0.0336467	1.0146e-21	20.9937
692	LBC21	DNAmTIMP1AdjAge	Gran	0.373635	0.0353122	2.38387e-24	23.6227
2796	LBC36	DNAmTIMP1AdjAge	Gran	0.452799	0.016868	2.06514e-141	140.685
1402	NAS	DNAmTIMP1AdjAge	Gran	0.455182	0.0237969	1.2235e-72	71.9124
998	WHI BA23 White	DNAmTIMP1AdjAge	Gran	0.397105	0.0290808	4.85141e-39	38.3141
676	WHI BA23 AfricanA	DNAmTIMP1AdjAge	Gran	0.292053	0.0368392	9.27002e-15	14.0329
433	WHI BA23 Hispanic	DNAmTIMP1AdjAge	Gran	0.441936	0.0432092	3.9655e-22	21.4017
11672	Meta	DNAmTIMP1AdjAge	Gran	0.402872	0.00845602	0	494.673
711	FHS	DNAmPACKYRSAdjAge	Bcell	-0.141817	0.0371762	0.000148221	3.82909
1746	JHS	DNAmPACKYRSAdjAge	Bcell	-0.0793021	0.0238702	0.000911514	3.04024
1430	InChianti	DNAmPACKYRSAdjAge	Bcell	-0.0825695	0.0263724	0.00177804	2.75006
788	BLSA	DNAmPACKYRSAdjAge	Bcell	-0.0695844	0.0355824	0.0508678	1.29356
692	LBC21	DNAmPACKYRSAdjAge	Bcell	0.045816	0.0380294	0.228712	0.640712
2796	LBC36	DNAmPACKYRSAdjAge	Bcell	-0.0454912	0.0188989	0.0161453	1.79195
1402	NAS	DNAmPACKYRSAdjAge	Bcell	0.0573604	0.0266821	0.0317444	1.49833
998	WHI BA23 White	DNAmPACKYRSAdjAge	Bcell	-0.00390374	0.031686	0.901973	0.0448066
676	WHI BA23 AfricanA	DNAmPACKYRSAdjAge	Bcell	-0.00756549	0.0385175	0.844343	0.0734812
433	WHI BA23 Hispanic	DNAmPACKYRSAdjAge	Bcell	-0.0167723	0.0481615	0.727822	0.137975
11672	Meta	DNAmPACKYRSAdjAge	Bcell	-0.0381777	0.00924372	3.62566e-05	4.44061
711	FHS	DNAmPACKYRSAdjAge	CD4T	-0.133604	0.0372191	0.00035392	3.4511
1746	JHS	DNAmPACKYRSAdjAge	CD4T	-0.0801115	0.0238687	0.000806771	3.09325
1430	InChianti	DNAmPACKYRSAdjAge	CD4T	-0.0686853	0.0264003	0.00937266	2.02814
788	BLSA	DNAmPACKYRSAdjAge	CD4T	-0.0155501	0.0356645	0.662948	0.17852
692	LBC21	DNAmPACKYRSAdjAge	CD4T	-0.0176687	0.0380634	0.642657	0.192021
2796	LBC36	DNAmPACKYRSAdjAge	CD4T	-0.0590412	0.0188855	0.00178858	2.74749
1402	NAS	DNAmPACKYRSAdjAge	CD4T	-0.00853074	0.0267252	0.74962	0.125159
998	WHI BA23 White	DNAmPACKYRSAdjAge	CD4T	0.0224347	0.0316782	0.478983	0.31968
676	WHI BA23 AfricanA	DNAmPACKYRSAdjAge	CD4T	-0.0290579	0.0385023	0.450689	0.346123
433	WHI BA23 Hispanic	DNAmPACKYRSAdjAge	CD4T	-0.00499519	0.0481677	0.917452	0.0374165
11672	Meta	DNAmPACKYRSAdjAge	CD4T	-0.0459124	0.00924726	6.87123e-07	6.16297
711	FHS	DNAmPACKYRSAdjAge	CD4.naive	0.0377513	0.037529	0.314796	0.501971
1746	JHS	DNAmPACKYRSAdjAge	CD4.naive	-0.0374987	0.0239288	0.117275	0.930796
1430	InChianti	DNAmPACKYRSAdjAge	CD4.naive	0.0291047	0.0264516	0.271386	0.566412
788	BLSA	DNAmPACKYRSAdjAge	CD4.naive	0.00625334	0.0356681	0.860873	0.0650608
692	LBC21	DNAmPACKYRSAdjAge	CD4.naive	-0.00471962	0.0380689	0.901371	0.0450966
2796	LBC36	DNAmPACKYRSAdjAge	CD4.naive	-0.00779125	0.0189179	0.680485	0.167181
1402	NAS	DNAmPACKYRSAdjAge	CD4.naive	0.160126	0.0263813	1.64719e-09	8.78326
998	WHI BA23 White	DNAmPACKYRSAdjAge	CD4.naive	0.0717478	0.0316046	0.0234101	1.6306
676	WHI BA23 AfricanA	DNAmPACKYRSAdjAge	CD4.naive	-0.053379	0.0384636	0.165663	0.780774
433	WHI BA23 Hispanic	DNAmPACKYRSAdjAge	CD4.naive	0.0323159	0.0481431	0.502423	0.29893
11672	Meta	DNAmPACKYRSAdjAge	CD4.naive	0.0224393	0.0092445	0.015211	1.81784
711	FHS	DNAmPACKYRSAdjAge	CD8.naive	-0.0950961	0.0373856	0.011181	1.95152
1746	JHS	DNAmPACKYRSAdjAge	CD8.naive	-0.153289	0.0236627	1.20504e-10	9.919
1430	InChianti	DNAmPACKYRSAdjAge	CD8.naive	-0.170541	0.0260751	8.52527e-11	10.0693
788	BLSA	DNAmPACKYRSAdjAge	CD8.naive	-0.146423	0.0352844	3.69079e-05	4.43288
692	LBC21	DNAmPACKYRSAdjAge	CD8.naive	-0.171351	0.0375063	5.816e-06	5.23538
2796	LBC36	DNAmPACKYRSAdjAge	CD8.naive	-0.207638	0.0185062	1.31836e-28	27.88
1402	NAS	DNAmPACKYRSAdjAge	CD8.naive	-0.240587	0.0259411	6.55084e-20	19.1837
998	WHI BA23 White	DNAmPACKYRSAdjAge	CD8.naive	-0.115463	0.0314743	0.000256921	3.5902
676	WHI BA23 AfricanA	DNAmPACKYRSAdjAge	CD8.naive	-0.212643	0.0376376	2.37139e-08	7.625
433	WHI BA23 Hispanic	DNAmPACKYRSAdjAge	CD8.naive	-0.140773	0.0476886	0.00333064	2.47747
11672	Meta	DNAmPACKYRSAdjAge	CD8.naive	-0.176339	0.00911077	1.84846e-83	82.7332
711	FHS	DNAmPACKYRSAdjAge	CD8T	0.0048275	0.0375554	0.897755	0.0468421
1746	JHS	DNAmPACKYRSAdjAge	CD8T	-0.0111263	0.0239442	0.64222	0.192316
1430	InChianti	DNAmPACKYRSAdjAge	CD8T	-0.0159353	0.0264594	0.547102	0.261932
788	BLSA	DNAmPACKYRSAdjAge	CD8T	0.0386143	0.0356422	0.27897	0.554443
692	LBC21	DNAmPACKYRSAdjAge	CD8T	0.166804	0.037536	1.02931e-05	4.98745
2796	LBC36	DNAmPACKYRSAdjAge	CD8T	-0.0248764	0.0189126	0.188507	0.724672
1402	NAS	DNAmPACKYRSAdjAge	CD8T	0.105102	0.0265781	8.05479e-05	4.09395
998	WHI BA23 White	DNAmPACKYRSAdjAge	CD8T	0.0631318	0.031623	0.0461636	1.3357
676	WHI BA23 AfricanA	DNAmPACKYRSAdjAge	CD8T	0.0586019	0.0384524	0.127975	0.892876
433	WHI BA23 Hispanic	DNAmPACKYRSAdjAge	CD8T	0.0418183	0.0481262	0.385368	0.414124
11672	Meta	DNAmPACKYRSAdjAge	CD8T	0.0265087	0.00924581	0.00414248	2.38274
711	FHS	DNAmPACKYRSAdjAge	CD8.ex	0.185002	0.0369075	6.79089e-07	6.16807
1746	JHS	DNAmPACKYRSAdjAge	CD8.ex	0.0873985	0.023854	0.000255838	3.59204
1430	InChianti	DNAmPACKYRSAdjAge	CD8.ex	0.109791	0.0263028	3.1722e-05	4.49864
788	BLSA	DNAmPACKYRSAdjAge	CD8.ex	0.0773787	0.0355619	0.0298607	1.5249
692	LBC21	DNAmPACKYRSAdjAge	CD8.ex	0.10778	0.0378476	0.00453414	2.34351
2796	LBC36	DNAmPACKYRSAdjAge	CD8.ex	0.187144	0.0185843	1.87422e-23	22.7272
1402	NAS	DNAmPACKYRSAdjAge	CD8.ex	0.113114	0.0265546	2.18374e-05	4.6608
998	WHI BA23 White	DNAmPACKYRSAdjAge	CD8.ex	0.0401161	0.0316607	0.205429	0.687338
676	WHI BA23 AfricanA	DNAmPACKYRSAdjAge	CD8.ex	0.142599	0.0381249	0.000199421	3.70023
433	WHI BA23 Hispanic	DNAmPACKYRSAdjAge	CD8.ex	0.0748205	0.0480333	0.120043	0.920663
11672	Meta	DNAmPACKYRSAdjAge	CD8.ex	0.122897	0.00918305	7.6015e-41	40.1191
711	FHS	DNAmPACKYRSAdjAge	NK	-0.186872	0.0368942	5.21086e-07	6.28309
1746	JHS	DNAmPACKYRSAdjAge	NK	-0.13074	0.0237401	4.19021e-08	7.37776
1430	InChianti	DNAmPACKYRSAdjAge	NK	-0.0911474	0.0263527	0.000558638	3.25287
788	BLSA	DNAmPACKYRSAdjAge	NK	-0.0375113	0.0356437	0.292942	0.533218
692	LBC21	DNAmPACKYRSAdjAge	NK	-0.0173511	0.0380636	0.648646	0.187992
2796	LBC36	DNAmPACKYRSAdjAge	NK	-0.051759	0.0188931	0.00619109	2.20823
1402	NAS	DNAmPACKYRSAdjAge	NK	-0.0549155	0.0266858	0.0397887	1.40024
998	WHI BA23 White	DNAmPACKYRSAdjAge	NK	-0.105396	0.0315097	0.000853891	3.0686
676	WHI BA23 AfricanA	DNAmPACKYRSAdjAge	NK	-0.0352329	0.0384946	0.360379	0.443241
433	WHI BA23 Hispanic	DNAmPACKYRSAdjAge	NK	-0.0325322	0.0481428	0.499565	0.301408
11672	Meta	DNAmPACKYRSAdjAge	NK	-0.0773146	0.00922709	5.33376e-17	16.273
711	FHS	DNAmPACKYRSAdjAge	PB	0.163849	0.0370482	1.12835e-05	4.94756
1746	JHS	DNAmPACKYRSAdjAge	PB	0.0888723	0.0238509	0.000200612	3.69764
1430	InChianti	DNAmPACKYRSAdjAge	PB	0.12397	0.0262587	2.57622e-06	5.58902
788	BLSA	DNAmPACKYRSAdjAge	PB	-0.00233903	0.0356687	0.947732	0.0233146
692	LBC21	DNAmPACKYRSAdjAge	PB	-0.00533175	0.0380688	0.888657	0.0512658
2796	LBC36	DNAmPACKYRSAdjAge	PB	0.0651435	0.0188783	0.000567418	3.2461
1402	NAS	DNAmPACKYRSAdjAge	PB	-0.131173	0.0264952	8.28656e-07	6.08163
998	WHI BA23 White	DNAmPACKYRSAdjAge	PB	0.0259837	0.0316755	0.412237	0.384853
676	WHI BA23 AfricanA	DNAmPACKYRSAdjAge	PB	0.00507248	0.0385181	0.895268	0.0480469
433	WHI BA23 Hispanic	DNAmPACKYRSAdjAge	PB	0.0307765	0.0481455	0.523006	0.281493
11672	Meta	DNAmPACKYRSAdjAge	PB	0.0415825	0.00922717	6.58977e-06	5.18113
711	FHS	DNAmPACKYRSAdjAge	Mono	-0.0290591	0.0375399	0.439138	0.357399
1746	JHS	DNAmPACKYRSAdjAge	Mono	0.0559642	0.0239081	0.0193546	1.71322
1430	InChianti	DNAmPACKYRSAdjAge	Mono	0.116315	0.0262832	1.0356e-05	4.98481
788	BLSA	DNAmPACKYRSAdjAge	Mono	0.0646734	0.0355941	0.0696026	1.15737
692	LBC21	DNAmPACKYRSAdjAge	Mono	0.0456803	0.0380296	0.230095	0.638094
2796	LBC36	DNAmPACKYRSAdjAge	Mono	0.0485604	0.0188962	0.0102257	1.99031
1402	NAS	DNAmPACKYRSAdjAge	Mono	-0.0281526	0.0267155	0.292161	0.534378
998	WHI BA23 White	DNAmPACKYRSAdjAge	Mono	-0.0600843	0.031629	0.0577663	1.23833
676	WHI BA23 AfricanA	DNAmPACKYRSAdjAge	Mono	-0.0200798	0.0385108	0.602254	0.220221
433	WHI BA23 Hispanic	DNAmPACKYRSAdjAge	Mono	-0.0244984	0.0481538	0.611186	0.213826
11672	Meta	DNAmPACKYRSAdjAge	Mono	0.0291325	0.00924727	0.00163051	2.78768
711	FHS	DNAmPACKYRSAdjAge	Gran	0.209134	0.0367253	1.81238e-08	7.74175
1746	JHS	DNAmPACKYRSAdjAge	Gran	0.101664	0.0238216	2.08065e-05	4.6818
1430	InChianti	DNAmPACKYRSAdjAge	Gran	0.0772737	0.0263837	0.00345623	2.4614
788	BLSA	DNAmPACKYRSAdjAge	Gran	-0.00766987	0.0356678	0.829795	0.0810294
692	LBC21	DNAmPACKYRSAdjAge	Gran	-0.0515702	0.0380187	0.175402	0.755966
2796	LBC36	DNAmPACKYRSAdjAge	Gran	0.069798	0.0188724	0.000221118	3.65538
1402	NAS	DNAmPACKYRSAdjAge	Gran	-0.0958535	0.0266031	0.000325455	3.48751
998	WHI BA23 White	DNAmPACKYRSAdjAge	Gran	0.0241375	0.031677	0.446248	0.350424
676	WHI BA23 AfricanA	DNAmPACKYRSAdjAge	Gran	0.00800309	0.0385173	0.835464	0.0780721
433	WHI BA23 Hispanic	DNAmPACKYRSAdjAge	Gran	0.000192814	0.0481683	0.996808	0.00138849
11672	Meta	DNAmPACKYRSAdjAge	Gran	0.042041	0.00922909	5.23166e-06	5.28136
