# Supplementary material for: DNA methylation GrimAge version 2
Source: Aging (Albany NY). 2022 Dec 14;14(23):9484–549. doi: 10.18632/aging.204434 (PMC9792204; doi:10.18632/aging.204434)
Supplement: Supplementary Table 4.2 [file aging-14-204434-s018.xlsx]

## Sheet: Table S4.2
Supplementary Table 4.2. Association with blood cell composition in males.
n	data	var	cell	Correlation	SE	P	log10P
327	FHS	AgeAccelGrim2	Bcell	-0.265027	0.0534865	1.16575e-06	5.9334
649	JHS	AgeAccelGrim2	Bcell	-0.248449	0.0380814	1.38018e-10	9.86007
639	InChianti	AgeAccelGrim2	Bcell	-0.198232	0.0388352	4.38592e-07	6.35794
404	BLSA	AgeAccelGrim2	Bcell	-0.287601	0.0477682	3.91744e-09	8.407
291	LBC21	AgeAccelGrim2	Bcell	-0.0356012	0.0587862	0.545253	0.263402
1441	LBC36	AgeAccelGrim2	Bcell	-0.205728	0.0257976	3.08885e-15	14.5102
1402	NAS	AgeAccelGrim2	Bcell	-0.0918985	0.026893	0.000651239	3.18626
5153	Meta	AgeAccelGrim2	Bcell	-0.182112	0.0137166	3.15732e-40	39.5007
327	FHS	AgeAccelGrim2	CD4T	-0.186192	0.0545	0.000715194	3.14558
649	JHS	AgeAccelGrim2	CD4T	-0.2188	0.0383615	1.78472e-08	7.74843
639	InChianti	AgeAccelGrim2	CD4T	-0.187586	0.0389181	1.79657e-06	5.74556
404	BLSA	AgeAccelGrim2	CD4T	-0.19851	0.0488829	5.87726e-05	4.23083
291	LBC21	AgeAccelGrim2	CD4T	-0.175748	0.057908	0.0026247	2.58092
1441	LBC36	AgeAccelGrim2	CD4T	-0.173709	0.0259607	3.16046e-11	10.5002
1402	NAS	AgeAccelGrim2	CD4T	-0.176211	0.0265847	4.86926e-11	10.3125
5153	Meta	AgeAccelGrim2	CD4T	-0.18477	0.0137466	3.47237e-41	40.4594
327	FHS	AgeAccelGrim2	CD4.naive	0.0465127	0.05541	0.401847	0.39594
649	JHS	AgeAccelGrim2	CD4.naive	-0.0882153	0.0391608	0.0246159	1.60878
639	InChianti	AgeAccelGrim2	CD4.naive	-0.0524638	0.0395669	0.18533	0.732054
404	BLSA	AgeAccelGrim2	CD4.naive	-0.0153944	0.0498696	0.757715	0.120494
291	LBC21	AgeAccelGrim2	CD4.naive	0.00451734	0.0588229	0.938839	0.0274088
1441	LBC36	AgeAccelGrim2	CD4.naive	0.0781329	0.0262809	0.00299815	2.52315
1402	NAS	AgeAccelGrim2	CD4.naive	0.0528156	0.0269696	0.050393	1.29763
5153	Meta	AgeAccelGrim2	CD4.naive	0.0204601	0.0139614	0.14279	0.845302
327	FHS	AgeAccelGrim2	CD8.naive	-0.132646	0.0549799	0.0163912	1.78539
649	JHS	AgeAccelGrim2	CD8.naive	-0.256625	0.0379975	3.21248e-11	10.4932
639	InChianti	AgeAccelGrim2	CD8.naive	-0.328872	0.0374175	1.3937e-17	16.8558
404	BLSA	AgeAccelGrim2	CD8.naive	-0.1916	0.0489514	0.000106565	3.97239
291	LBC21	AgeAccelGrim2	CD8.naive	-0.12231	0.0583819	0.0370407	1.43132
1441	LBC36	AgeAccelGrim2	CD8.naive	-0.0693338	0.026298	0.00846763	2.07224
1402	NAS	AgeAccelGrim2	CD8.naive	-0.258288	0.0260909	2.30349e-22	21.6376
5153	Meta	AgeAccelGrim2	CD8.naive	-0.196154	0.0136547	8.54048e-47	46.0685
327	FHS	AgeAccelGrim2	CD8T	-0.053214	0.0553914	0.337422	0.471826
649	JHS	AgeAccelGrim2	CD8T	-0.098965	0.0391211	0.0116519	1.93361
639	InChianti	AgeAccelGrim2	CD8T	-0.128246	0.0392943	0.0011584	2.93614
404	BLSA	AgeAccelGrim2	CD8T	-0.134326	0.0494235	0.00685476	2.16401
291	LBC21	AgeAccelGrim2	CD8T	0.151733	0.0581424	0.00953475	2.02069
1441	LBC36	AgeAccelGrim2	CD8T	0.0199218	0.0263562	0.449852	0.34693
1402	NAS	AgeAccelGrim2	CD8T	0.00925089	0.0270062	0.731991	0.135494
5153	Meta	AgeAccelGrim2	CD8T	-0.0260186	0.0139443	0.0620565	1.20721
327	FHS	AgeAccelGrim2	CD8.ex	0.205345	0.0542879	0.000184764	3.73338
649	JHS	AgeAccelGrim2	CD8.ex	0.131143	0.0389745	0.000811124	3.09091
639	InChianti	AgeAccelGrim2	CD8.ex	0.187577	0.0389182	1.79865e-06	5.74505
404	BLSA	AgeAccelGrim2	CD8.ex	0.208573	0.0487785	2.38051e-05	4.62333
291	LBC21	AgeAccelGrim2	CD8.ex	0.117616	0.0584152	0.0449944	1.34684
1441	LBC36	AgeAccelGrim2	CD8.ex	0.210324	0.0257718	7.17652e-16	15.1441
1402	NAS	AgeAccelGrim2	CD8.ex	0.162201	0.0266497	1.49616e-09	8.82502
5153	Meta	AgeAccelGrim2	CD8.ex	0.179198	0.0137557	8.57924e-39	38.0666
327	FHS	AgeAccelGrim2	NK	-0.378684	0.0513389	1.36794e-12	11.8639
649	JHS	AgeAccelGrim2	NK	-0.25037	0.0380619	9.84567e-11	10.0068
639	InChianti	AgeAccelGrim2	NK	-0.199362	0.0388261	3.75857e-07	6.42498
404	BLSA	AgeAccelGrim2	NK	-0.141824	0.0493713	0.00428678	2.36787
291	LBC21	AgeAccelGrim2	NK	-0.127958	0.05834	0.0290814	1.53639
1441	LBC36	AgeAccelGrim2	NK	-0.179134	0.0259351	7.40649e-12	11.1304
1402	NAS	AgeAccelGrim2	NK	-0.183568	0.0265484	7.17854e-12	11.144
5153	Meta	AgeAccelGrim2	NK	-0.200519	0.0136812	1.22328e-48	47.9125
327	FHS	AgeAccelGrim2	PB	0.225415	0.0540424	3.89434e-05	4.40957
649	JHS	AgeAccelGrim2	PB	0.203898	0.0384882	1.6099e-07	6.7932
639	InChianti	AgeAccelGrim2	PB	0.303709	0.0377499	4.21408e-15	14.3753
404	BLSA	AgeAccelGrim2	PB	0.238695	0.0484338	1.21501e-06	5.91542
291	LBC21	AgeAccelGrim2	PB	0.230492	0.0572397	7.23129e-05	4.14078
1441	LBC36	AgeAccelGrim2	PB	0.221069	0.0257092	2.06859e-17	16.6843
1402	NAS	AgeAccelGrim2	PB	0.0846995	0.0269103	0.00168232	2.77409
5153	Meta	AgeAccelGrim2	PB	0.196738	0.0136787	6.63312e-47	46.1783
327	FHS	AgeAccelGrim2	Mono	-0.0540002	0.0553891	0.330322	0.481062
649	JHS	AgeAccelGrim2	Mono	0.0874643	0.0391634	0.0258692	1.58722
639	InChianti	AgeAccelGrim2	Mono	0.106706	0.0393952	0.00693848	2.15874
404	BLSA	AgeAccelGrim2	Mono	0.0819107	0.0497079	0.100166	0.999278
291	LBC21	AgeAccelGrim2	Mono	0.102562	0.0585133	0.0806967	1.09314
1441	LBC36	AgeAccelGrim2	Mono	-0.00327737	0.0263613	0.901075	0.0452389
1402	NAS	AgeAccelGrim2	Mono	0.0896643	0.0268985	0.000880712	3.05517
5153	Meta	AgeAccelGrim2	Mono	0.0565144	0.013948	5.08244e-05	4.29393
327	FHS	AgeAccelGrim2	Gran	0.363625	0.0516728	1.16943e-11	10.932
649	JHS	AgeAccelGrim2	Gran	0.300932	0.0374917	4.72926e-15	14.3252
639	InChianti	AgeAccelGrim2	Gran	0.269498	0.0381555	4.27663e-12	11.3689
404	BLSA	AgeAccelGrim2	Gran	0.295199	0.0476528	1.44488e-09	8.84017
291	LBC21	AgeAccelGrim2	Gran	0.130339	0.0583217	0.0261923	1.58183
1441	LBC36	AgeAccelGrim2	Gran	0.237337	0.0256082	6.6984e-20	19.174
1402	NAS	AgeAccelGrim2	Gran	0.158407	0.0266663	3.60072e-09	8.44361
5153	Meta	AgeAccelGrim2	Gran	0.236906	0.0135602	2.39283e-68	67.6211
327	FHS	AgeAccelGrim	Bcell	-0.247127	0.0537495	6.12407e-06	5.21296
649	JHS	AgeAccelGrim	Bcell	-0.158093	0.0388197	5.22774e-05	4.28169
639	InChianti	AgeAccelGrim	Bcell	-0.170248	0.039043	1.51285e-05	4.8202
404	BLSA	AgeAccelGrim	Bcell	-0.256991	0.0482003	1.62606e-07	6.78886
291	LBC21	AgeAccelGrim	Bcell	0.0440091	0.0587665	0.454538	0.34243
1441	LBC36	AgeAccelGrim	Bcell	-0.182662	0.025918	2.81285e-12	11.5509
1402	NAS	AgeAccelGrim	Bcell	-0.0556295	0.0266847	0.037278	1.42855
5153	Meta	AgeAccelGrim	Bcell	-0.142089	0.0137637	5.5179e-25	24.2582
327	FHS	AgeAccelGrim	CD4T	-0.18731	0.0544882	0.000663197	3.17836
649	JHS	AgeAccelGrim	CD4T	-0.148117	0.0388804	0.000152481	3.81679
639	InChianti	AgeAccelGrim	CD4T	-0.127864	0.0392962	0.00119874	2.92128
404	BLSA	AgeAccelGrim	CD4T	-0.157794	0.0492506	0.00146384	2.83451
291	LBC21	AgeAccelGrim	CD4T	-0.0956866	0.0585536	0.103312	0.98585
1441	LBC36	AgeAccelGrim	CD4T	-0.147882	0.0260716	1.70213e-08	7.76901
1402	NAS	AgeAccelGrim	CD4T	-0.1378	0.0264712	2.22122e-07	6.65341
5153	Meta	AgeAccelGrim	CD4T	-0.143108	0.0138038	3.49176e-25	24.457
327	FHS	AgeAccelGrim	CD4.naive	0.0741633	0.0553173	0.180957	0.742423
649	JHS	AgeAccelGrim	CD4.naive	-0.0150327	0.0393096	0.702277	0.153491
639	InChianti	AgeAccelGrim	CD4.naive	0.0103764	0.0396193	0.793481	0.100463
404	BLSA	AgeAccelGrim	CD4.naive	0.0416147	0.0498323	0.40416	0.393447
291	LBC21	AgeAccelGrim	CD4.naive	0.00744118	0.0588219	0.899421	0.0460368
1441	LBC36	AgeAccelGrim	CD4.naive	0.0861473	0.0262635	0.00106245	2.97369
1402	NAS	AgeAccelGrim	CD4.naive	0.103858	0.0265816	9.7853e-05	4.00943
5153	Meta	AgeAccelGrim	CD4.naive	0.0603564	0.0139107	1.43235e-05	4.84395
327	FHS	AgeAccelGrim	CD8.naive	-0.133066	0.0549767	0.0160511	1.7945
649	JHS	AgeAccelGrim	CD8.naive	-0.228239	0.0382764	4.07568e-09	8.3898
639	InChianti	AgeAccelGrim	CD8.naive	-0.254738	0.0383143	6.3659e-11	10.1961
404	BLSA	AgeAccelGrim	CD8.naive	-0.163118	0.0492075	0.000999931	3.00003
291	LBC21	AgeAccelGrim	CD8.naive	-0.198781	0.0576496	0.000648537	3.18807
1441	LBC36	AgeAccelGrim	CD8.naive	-0.119134	0.0261737	5.7702e-06	5.23881
1402	NAS	AgeAccelGrim	CD8.naive	-0.259322	0.0258118	5.58538e-23	22.2529
5153	Meta	AgeAccelGrim	CD8.naive	-0.198103	0.0136473	9.60524e-48	47.0175
327	FHS	AgeAccelGrim	CD8T	-0.0272231	0.0554495	0.62379	0.204961
649	JHS	AgeAccelGrim	CD8T	-0.0471556	0.0392703	0.23027	0.637762
639	InChianti	AgeAccelGrim	CD8T	-0.139605	0.0392334	0.000400977	3.39688
404	BLSA	AgeAccelGrim	CD8T	-0.0932946	0.0496579	0.0610028	1.21465
291	LBC21	AgeAccelGrim	CD8T	0.15476	0.0581148	0.00817896	2.0873
1441	LBC36	AgeAccelGrim	CD8T	0.0359962	0.0263444	0.172036	0.764381
1402	NAS	AgeAccelGrim	CD8T	0.0578373	0.0266814	0.0303494	1.51785
5153	Meta	AgeAccelGrim	CD8T	0.00212187	0.013907	0.878733	0.0561432
327	FHS	AgeAccelGrim	CD8.ex	0.212942	0.0541978	0.000104234	3.98199
649	JHS	AgeAccelGrim	CD8.ex	0.108395	0.0390824	0.00570541	2.24371
639	InChianti	AgeAccelGrim	CD8.ex	0.138138	0.0392416	0.000461991	3.33537
404	BLSA	AgeAccelGrim	CD8.ex	0.206916	0.0487961	2.77097e-05	4.55737
291	LBC21	AgeAccelGrim	CD8.ex	0.158342	0.0580814	0.00679812	2.16761
1441	LBC36	AgeAccelGrim	CD8.ex	0.249599	0.0255271	6.62537e-22	21.1788
1402	NAS	AgeAccelGrim	CD8.ex	0.174569	0.0263157	4.66612e-11	10.331
5153	Meta	AgeAccelGrim	CD8.ex	0.187679	0.0136851	8.36094e-43	42.0777
327	FHS	AgeAccelGrim	NK	-0.354107	0.0518758	4.28967e-11	10.3676
649	JHS	AgeAccelGrim	NK	-0.238693	0.0381777	7.35227e-10	9.13358
639	InChianti	AgeAccelGrim	NK	-0.189185	0.0389059	1.46107e-06	5.83533
404	BLSA	AgeAccelGrim	NK	-0.121844	0.0495039	0.0142624	1.84581
291	LBC21	AgeAccelGrim	NK	-0.0618267	0.058711	0.29319	0.532851
1441	LBC36	AgeAccelGrim	NK	-0.138933	0.0261058	1.18966e-07	6.92458
1402	NAS	AgeAccelGrim	NK	-0.128391	0.0265049	1.41354e-06	5.84969
5153	Meta	AgeAccelGrim	NK	-0.164794	0.0137266	3.3276e-33	32.4779
327	FHS	AgeAccelGrim	PB	0.220505	0.0541047	5.77645e-05	4.23834
649	JHS	AgeAccelGrim	PB	0.14026	0.0389254	0.000338316	3.47068
639	InChianti	AgeAccelGrim	PB	0.257477	0.0382856	3.90616e-11	10.4083
404	BLSA	AgeAccelGrim	PB	0.199625	0.0488716	5.32869e-05	4.27338
291	LBC21	AgeAccelGrim	PB	0.142631	0.0582221	0.0148882	1.82716
1441	LBC36	AgeAccelGrim	PB	0.184861	0.0259071	1.52333e-12	11.8172
1402	NAS	AgeAccelGrim	PB	0.00377361	0.0267259	0.887735	0.0517166
5153	Meta	AgeAccelGrim	PB	0.14183	0.0137524	6.14427e-25	24.2115
327	FHS	AgeAccelGrim	Mono	-0.0874666	0.0552574	0.114418	0.941504
649	JHS	AgeAccelGrim	Mono	0.0478807	0.039269	0.223174	0.651357
639	InChianti	AgeAccelGrim	Mono	0.0877899	0.0394685	0.0264776	1.57712
404	BLSA	AgeAccelGrim	Mono	0.0510158	0.0498105	0.306358	0.51377
291	LBC21	AgeAccelGrim	Mono	0.0937297	0.0585646	0.110591	0.95628
1441	LBC36	AgeAccelGrim	Mono	0.00423591	0.0263612	0.872362	0.0593031
1402	NAS	AgeAccelGrim	Mono	0.0512803	0.026691	0.0549014	1.26042
5153	Meta	AgeAccelGrim	Mono	0.0358329	0.0139275	0.0100878	1.9962
327	FHS	AgeAccelGrim	Gran	0.345265	0.0520589	1.38081e-10	9.85986
649	JHS	AgeAccelGrim	Gran	0.214926	0.0383953	3.21083e-08	7.49338
639	InChianti	AgeAccelGrim	Gran	0.227846	0.0385793	5.70787e-09	8.24353
404	BLSA	AgeAccelGrim	Gran	0.240645	0.0484098	9.87926e-07	6.00528
291	LBC21	AgeAccelGrim	Gran	0.0331167	0.0587913	0.573672	0.241336
1441	LBC36	AgeAccelGrim	Gran	0.191637	0.0258729	2.19373e-13	12.6588
1402	NAS	AgeAccelGrim	Gran	0.06527	0.0266691	0.0145114	1.83829
5153	Meta	AgeAccelGrim	Gran	0.171804	0.0136908	4.03219e-36	35.3945
327	FHS	DNAmADMAdjAge	Bcell	-0.185424	0.0545081	0.00075312	3.12314
649	JHS	DNAmADMAdjAge	Bcell	-0.162022	0.0387946	3.36767e-05	4.47267
639	InChianti	DNAmADMAdjAge	Bcell	-0.140556	0.0392281	0.000365554	3.43705
404	BLSA	DNAmADMAdjAge	Bcell	-0.211197	0.0487504	1.86695e-05	4.72887
291	LBC21	DNAmADMAdjAge	Bcell	0.178684	0.0578769	0.00221587	2.65446
1441	LBC36	DNAmADMAdjAge	Bcell	-0.168477	0.0259846	1.22668e-10	9.91127
1402	NAS	DNAmADMAdjAge	Bcell	-0.072024	0.0266567	0.00697751	2.1563
5153	Meta	DNAmADMAdjAge	Bcell	-0.123192	0.0137902	4.13371e-19	18.3837
327	FHS	DNAmADMAdjAge	CD4T	-0.0546344	0.0553872	0.324666	0.488563
649	JHS	DNAmADMAdjAge	CD4T	-0.125186	0.0390048	0.00139543	2.85529
639	InChianti	DNAmADMAdjAge	CD4T	-0.0688292	0.0395275	0.082114	1.08558
404	BLSA	DNAmADMAdjAge	CD4T	-0.157718	0.0492512	0.00147177	2.83216
291	LBC21	DNAmADMAdjAge	CD4T	-0.222803	0.0573449	0.000126764	3.897
1441	LBC36	DNAmADMAdjAge	CD4T	-0.209183	0.0257783	1.03441e-15	14.9853
1402	NAS	DNAmADMAdjAge	CD4T	-0.135239	0.0264806	3.7222e-07	6.4292
5153	Meta	DNAmADMAdjAge	CD4T	-0.148858	0.0137743	3.19171e-27	26.496
327	FHS	DNAmADMAdjAge	CD4.naive	0.100333	0.0551901	0.0699916	1.15495
649	JHS	DNAmADMAdjAge	CD4.naive	-0.0840253	0.039175	0.0323349	1.49033
639	InChianti	DNAmADMAdjAge	CD4.naive	0.0620928	0.039545	0.116869	0.932299
404	BLSA	DNAmADMAdjAge	CD4.naive	-0.00687252	0.0498743	0.89047	0.0503807
291	LBC21	DNAmADMAdjAge	CD4.naive	0.0186534	0.0588133	0.751349	0.124159
1441	LBC36	DNAmADMAdjAge	CD4.naive	0.104012	0.0262185	7.63286e-05	4.11731
1402	NAS	DNAmADMAdjAge	CD4.naive	0.0177214	0.0267219	0.507325	0.294714
5153	Meta	DNAmADMAdjAge	CD4.naive	0.0380691	0.0139135	0.00621668	2.20644
327	FHS	DNAmADMAdjAge	CD8.naive	-0.158656	0.0547674	0.00402418	2.39532
649	JHS	DNAmADMAdjAge	CD8.naive	-0.155332	0.0388369	7.07748e-05	4.15012
639	InChianti	DNAmADMAdjAge	CD8.naive	-0.000730552	0.0396214	0.985295	0.00643373
404	BLSA	DNAmADMAdjAge	CD8.naive	-0.221999	0.0486309	6.64851e-06	5.17728
291	LBC21	DNAmADMAdjAge	CD8.naive	-0.0459937	0.0587613	0.434431	0.362079
1441	LBC36	DNAmADMAdjAge	CD8.naive	0.0568814	0.0263188	0.0308408	1.51087
1402	NAS	DNAmADMAdjAge	CD8.naive	-0.162972	0.0263688	8.36588e-10	9.07749
5153	Meta	DNAmADMAdjAge	CD8.naive	-0.0795382	0.0138307	8.88013e-09	8.05158
327	FHS	DNAmADMAdjAge	CD8T	-0.110404	0.0551309	0.0460522	1.33675
649	JHS	DNAmADMAdjAge	CD8T	-0.0711779	0.0392143	0.0699717	1.15508
639	InChianti	DNAmADMAdjAge	CD8T	-0.185017	0.0389374	2.49559e-06	5.60283
404	BLSA	DNAmADMAdjAge	CD8T	-0.223621	0.0486124	5.66852e-06	5.24653
291	LBC21	DNAmADMAdjAge	CD8T	0.0891012	0.0585896	0.129411	0.888028
1441	LBC36	DNAmADMAdjAge	CD8T	0.0691437	0.0262984	0.00864981	2.06299
1402	NAS	DNAmADMAdjAge	CD8T	-0.0783271	0.026644	0.00333851	2.47645
5153	Meta	DNAmADMAdjAge	CD8T	-0.0544698	0.013857	8.46416e-05	4.07242
327	FHS	DNAmADMAdjAge	CD8.ex	0.0890476	0.0552497	0.107991	0.966612
649	JHS	DNAmADMAdjAge	CD8.ex	0.0795416	0.0391895	0.0427992	1.36856
639	InChianti	DNAmADMAdjAge	CD8.ex	0.0230087	0.039611	0.561536	0.250622
404	BLSA	DNAmADMAdjAge	CD8.ex	0.280853	0.047868	9.26947e-09	8.03295
291	LBC21	DNAmADMAdjAge	CD8.ex	0.0550548	0.0587343	0.349359	0.456728
1441	LBC36	DNAmADMAdjAge	CD8.ex	0.127019	0.0261479	1.31738e-06	5.88029
1402	NAS	DNAmADMAdjAge	CD8.ex	0.156488	0.0263969	3.84956e-09	8.41459
5153	Meta	DNAmADMAdjAge	CD8.ex	0.122997	0.0138143	5.40703e-19	18.267
327	FHS	DNAmADMAdjAge	NK	-0.268371	0.0534351	8.43406e-07	6.07396
649	JHS	DNAmADMAdjAge	NK	-0.111831	0.0390674	0.00433886	2.36262
639	InChianti	DNAmADMAdjAge	NK	-0.205126	0.0387789	1.68741e-07	6.77278
404	BLSA	DNAmADMAdjAge	NK	-0.180319	0.0490579	0.000269429	3.56956
291	LBC21	DNAmADMAdjAge	NK	-0.0694835	0.0586814	0.237354	0.624603
1441	LBC36	DNAmADMAdjAge	NK	-0.084116	0.026268	0.00139358	2.85587
1402	NAS	DNAmADMAdjAge	NK	-0.183782	0.0262709	4.07961e-12	11.3894
5153	Meta	DNAmADMAdjAge	NK	-0.149201	0.0137692	2.32783e-27	26.633
327	FHS	DNAmADMAdjAge	PB	0.191813	0.05444	0.000487136	3.31235
649	JHS	DNAmADMAdjAge	PB	0.145701	0.0388945	0.000195669	3.70848
639	InChianti	DNAmADMAdjAge	PB	0.17731	0.0389936	6.50964e-06	5.18644
404	BLSA	DNAmADMAdjAge	PB	0.255304	0.0482226	1.97038e-07	6.70545
291	LBC21	DNAmADMAdjAge	PB	0.324412	0.0556421	1.47747e-08	7.83048
1441	LBC36	DNAmADMAdjAge	PB	0.322462	0.0249533	3.19042e-36	35.4962
1402	NAS	DNAmADMAdjAge	PB	0.172112	0.0263273	8.74728e-11	10.0581
5153	Meta	DNAmADMAdjAge	PB	0.230566	0.0135359	4.62452e-65	64.3349
327	FHS	DNAmADMAdjAge	Mono	-0.00133714	0.05547	0.980783	0.00842704
649	JHS	DNAmADMAdjAge	Mono	0.0742823	0.0392054	0.0585785	1.23226
639	InChianti	DNAmADMAdjAge	Mono	-0.00109542	0.0396214	0.977952	0.00968234
404	BLSA	DNAmADMAdjAge	Mono	0.0200319	0.0498655	0.688104	0.162346
291	LBC21	DNAmADMAdjAge	Mono	0.00957564	0.0588208	0.870795	0.0600841
1441	LBC36	DNAmADMAdjAge	Mono	-0.041515	0.0263387	0.1152	0.938546
1402	NAS	DNAmADMAdjAge	Mono	0.109131	0.0265665	4.2249e-05	4.37418
5153	Meta	DNAmADMAdjAge	Mono	0.0296003	0.0139183	0.0334433	1.47569
327	FHS	DNAmADMAdjAge	Gran	0.22126	0.0540952	5.43954e-05	4.26444
649	JHS	DNAmADMAdjAge	Gran	0.16127	0.0387994	3.66627e-05	4.43578
639	InChianti	DNAmADMAdjAge	Gran	0.228279	0.0385753	5.33128e-09	8.27317
404	BLSA	DNAmADMAdjAge	Gran	0.285579	0.0477984	5.08274e-09	8.2939
291	LBC21	DNAmADMAdjAge	Gran	0.0822196	0.0586244	0.161845	0.790901
1441	LBC36	DNAmADMAdjAge	Gran	0.185837	0.0259023	1.15723e-12	11.9366
1402	NAS	DNAmADMAdjAge	Gran	0.192209	0.0262278	3.92008e-13	12.4067
5153	Meta	DNAmADMAdjAge	Gran	0.194635	0.0136706	5.36027e-46	45.2708
327	FHS	DNAmB2MAdjAge	Bcell	-0.0428728	0.055419	0.439723	0.356821
649	JHS	DNAmB2MAdjAge	Bcell	-0.0483752	0.039268	0.218425	0.660697
639	InChianti	DNAmB2MAdjAge	Bcell	-0.0754457	0.0395085	0.0566327	1.24693
404	BLSA	DNAmB2MAdjAge	Bcell	-0.0264037	0.0498581	0.596698	0.224245
291	LBC21	DNAmB2MAdjAge	Bcell	0.0939003	0.0585636	0.109941	0.95884
1441	LBC36	DNAmB2MAdjAge	Bcell	-0.0606876	0.0263129	0.0212307	1.67303
1402	NAS	DNAmB2MAdjAge	Bcell	-0.0587709	0.0266799	0.0277705	1.55642
5153	Meta	DNAmB2MAdjAge	Bcell	-0.0479131	0.0139241	0.000579555	3.23691
327	FHS	DNAmB2MAdjAge	CD4T	-0.209657	0.0542372	0.00013385	3.87338
649	JHS	DNAmB2MAdjAge	CD4T	-0.0108095	0.0393118	0.783427	0.106001
639	InChianti	DNAmB2MAdjAge	CD4T	-0.191519	0.038888	1.0769e-06	5.96782
404	BLSA	DNAmB2MAdjAge	CD4T	-0.117933	0.0495274	0.0177228	1.75147
291	LBC21	DNAmB2MAdjAge	CD4T	-0.0166119	0.0588154	0.777808	0.109128
1441	LBC36	DNAmB2MAdjAge	CD4T	-0.188519	0.0258888	5.39893e-13	12.2677
1402	NAS	DNAmB2MAdjAge	CD4T	-0.173587	0.0263204	6.00521e-11	10.2215
5153	Meta	DNAmB2MAdjAge	CD4T	-0.149537	0.0137613	1.66555e-27	26.7784
327	FHS	DNAmB2MAdjAge	CD4.naive	-0.0716642	0.0553274	0.196145	0.707424
649	JHS	DNAmB2MAdjAge	CD4.naive	-0.0459892	0.0392725	0.242018	0.616153
639	InChianti	DNAmB2MAdjAge	CD4.naive	-0.161243	0.039103	4.22499e-05	4.37417
404	BLSA	DNAmB2MAdjAge	CD4.naive	-0.0471991	0.0498199	0.344007	0.463433
291	LBC21	DNAmB2MAdjAge	CD4.naive	-0.175055	0.0579152	0.00273071	2.56372
1441	LBC36	DNAmB2MAdjAge	CD4.naive	-0.165973	0.0259958	2.31303e-10	9.63582
1402	NAS	DNAmB2MAdjAge	CD4.naive	0.0166206	0.0267224	0.534062	0.272408
5153	Meta	DNAmB2MAdjAge	CD4.naive	-0.0867936	0.0138539	3.72989e-10	9.4283
327	FHS	DNAmB2MAdjAge	CD8.naive	-0.182203	0.0545415	0.000933186	3.03003
649	JHS	DNAmB2MAdjAge	CD8.naive	-0.107015	0.0390883	0.00635582	2.19683
639	InChianti	DNAmB2MAdjAge	CD8.naive	-0.108809	0.0393862	0.0058993	2.2292
404	BLSA	DNAmB2MAdjAge	CD8.naive	-0.26243	0.0481274	8.67345e-08	7.06181
291	LBC21	DNAmB2MAdjAge	CD8.naive	-0.456086	0.0523492	2.35084e-16	15.6288
1441	LBC36	DNAmB2MAdjAge	CD8.naive	-0.245026	0.0255579	3.81883e-21	20.4181
1402	NAS	DNAmB2MAdjAge	CD8.naive	-0.194259	0.026217	2.18076e-13	12.6614
5153	Meta	DNAmB2MAdjAge	CD8.naive	-0.210217	0.013586	5.27104e-54	53.2781
327	FHS	DNAmB2MAdjAge	CD8T	0.0353479	0.0554354	0.524156	0.280539
649	JHS	DNAmB2MAdjAge	CD8T	-0.0275433	0.0392991	0.48364	0.315477
639	InChianti	DNAmB2MAdjAge	CD8T	-0.000845679	0.0396214	0.982978	0.00745623
404	BLSA	DNAmB2MAdjAge	CD8T	-0.0515255	0.0498092	0.301544	0.520649
291	LBC21	DNAmB2MAdjAge	CD8T	-0.00243806	0.0588234	0.966968	0.0145879
1441	LBC36	DNAmB2MAdjAge	CD8T	-0.11181	0.0261962	2.09955e-05	4.67787
1402	NAS	DNAmB2MAdjAge	CD8T	0.0345641	0.0267102	0.195863	0.708047
5153	Meta	DNAmB2MAdjAge	CD8T	-0.0276751	0.01392	0.0467945	1.32981
327	FHS	DNAmB2MAdjAge	CD8.ex	0.123986	0.055042	0.024953	1.60288
649	JHS	DNAmB2MAdjAge	CD8.ex	0.0674058	0.0392246	0.0861921	1.06453
639	InChianti	DNAmB2MAdjAge	CD8.ex	0.0912448	0.0394562	0.0210646	1.67645
404	BLSA	DNAmB2MAdjAge	CD8.ex	0.11703	0.0495327	0.0186187	1.73005
291	LBC21	DNAmB2MAdjAge	CD8.ex	0.410522	0.0536383	2.94231e-13	12.5313
1441	LBC36	DNAmB2MAdjAge	CD8.ex	0.283134	0.0252828	5.71268e-28	27.2432
1402	NAS	DNAmB2MAdjAge	CD8.ex	0.168109	0.0263458	2.38798e-10	9.62197
5153	Meta	DNAmB2MAdjAge	CD8.ex	0.189287	0.0136302	7.55881e-44	43.1215
327	FHS	DNAmB2MAdjAge	NK	-0.225905	0.0540361	3.74213e-05	4.42688
649	JHS	DNAmB2MAdjAge	NK	0.0339349	0.0392914	0.388089	0.411069
639	InChianti	DNAmB2MAdjAge	NK	-0.0881344	0.0394673	0.0258888	1.58689
404	BLSA	DNAmB2MAdjAge	NK	-0.0217513	0.0498637	0.662915	0.178542
291	LBC21	DNAmB2MAdjAge	NK	0.0824446	0.0586233	0.160696	0.793995
1441	LBC36	DNAmB2MAdjAge	NK	-0.0602587	0.0263136	0.022164	1.65435
1402	NAS	DNAmB2MAdjAge	NK	-0.0452031	0.0266988	0.0906636	1.04257
5153	Meta	DNAmB2MAdjAge	NK	-0.0477852	0.0139043	0.000588825	3.23001
327	FHS	DNAmB2MAdjAge	PB	0.119328	0.0550737	0.0309849	1.50885
649	JHS	DNAmB2MAdjAge	PB	-0.000297769	0.0393141	0.993959	0.00263147
639	InChianti	DNAmB2MAdjAge	PB	0.146513	0.0391939	0.000202049	3.69454
404	BLSA	DNAmB2MAdjAge	PB	0.109522	0.0495754	0.0277245	1.55714
291	LBC21	DNAmB2MAdjAge	PB	-0.204521	0.0575801	0.000446356	3.35032
1441	LBC36	DNAmB2MAdjAge	PB	-0.0494973	0.0263292	0.060318	1.21955
1402	NAS	DNAmB2MAdjAge	PB	0.0828771	0.0266342	0.00189786	2.72174
5153	Meta	DNAmB2MAdjAge	PB	0.0313834	0.013883	0.0237864	1.62367
327	FHS	DNAmB2MAdjAge	Mono	0.0847469	0.0552705	0.126172	0.899037
649	JHS	DNAmB2MAdjAge	Mono	0.0313764	0.0392947	0.42488	0.371734
639	InChianti	DNAmB2MAdjAge	Mono	0.110318	0.0393796	0.00524282	2.28044
404	BLSA	DNAmB2MAdjAge	Mono	0.0999025	0.049626	0.0447693	1.34902
291	LBC21	DNAmB2MAdjAge	Mono	0.0991997	0.0585334	0.0911992	1.04001
1441	LBC36	DNAmB2MAdjAge	Mono	0.159821	0.0260226	1.05495e-09	8.97677
1402	NAS	DNAmB2MAdjAge	Mono	0.0795256	0.0266415	0.00288471	2.5399
5153	Meta	DNAmB2MAdjAge	Mono	0.103159	0.013863	9.96998e-14	13.0013
327	FHS	DNAmB2MAdjAge	Gran	0.185653	0.0545057	0.000741617	3.12982
649	JHS	DNAmB2MAdjAge	Gran	0.0218492	0.0393047	0.578476	0.237714
639	InChianti	DNAmB2MAdjAge	Gran	0.136581	0.0392501	0.000536128	3.27073
404	BLSA	DNAmB2MAdjAge	Gran	0.0926707	0.0496608	0.0627595	1.20232
291	LBC21	DNAmB2MAdjAge	Gran	-0.176549	0.0578995	0.00250678	2.60088
1441	LBC36	DNAmB2MAdjAge	Gran	0.054737	0.0263219	0.0377465	1.42312
1402	NAS	DNAmB2MAdjAge	Gran	0.0931269	0.02661	0.000480392	3.3184
5153	Meta	DNAmB2MAdjAge	Gran	0.0694718	0.0138777	5.55701e-07	6.25516
327	FHS	DNAmCystatinCAdjAge	Bcell	-0.251955	0.0536805	3.9626e-06	5.40202
649	JHS	DNAmCystatinCAdjAge	Bcell	-0.237374	0.0381904	9.16645e-10	9.0378
639	InChianti	DNAmCystatinCAdjAge	Bcell	-0.156852	0.039131	6.83714e-05	4.16513
404	BLSA	DNAmCystatinCAdjAge	Bcell	-0.267678	0.0480554	4.66549e-08	7.3311
291	LBC21	DNAmCystatinCAdjAge	Bcell	0.0277929	0.0588008	0.636811	0.195989
1441	LBC36	DNAmCystatinCAdjAge	Bcell	-0.246495	0.0255481	2.18465e-21	20.6606
1402	NAS	DNAmCystatinCAdjAge	Bcell	-0.116645	0.0265437	1.19419e-05	4.92293
5153	Meta	DNAmCystatinCAdjAge	Bcell	-0.18728	0.0136597	8.80482e-43	42.0553
327	FHS	DNAmCystatinCAdjAge	CD4T	-0.244584	0.0537853	7.67503e-06	5.11492
649	JHS	DNAmCystatinCAdjAge	CD4T	-0.276367	0.0377829	7.66283e-13	12.1156
639	InChianti	DNAmCystatinCAdjAge	CD4T	-0.29008	0.0379178	7.44202e-14	13.1283
404	BLSA	DNAmCystatinCAdjAge	CD4T	-0.300074	0.047577	7.50122e-10	9.12487
291	LBC21	DNAmCystatinCAdjAge	CD4T	-0.201465	0.0576174	0.000545305	3.26336
1441	LBC36	DNAmCystatinCAdjAge	CD4T	-0.236164	0.0256158	1.02809e-19	18.988
1402	NAS	DNAmCystatinCAdjAge	CD4T	-0.220696	0.0260671	6.29789e-17	16.2008
5153	Meta	DNAmCystatinCAdjAge	CD4T	-0.247767	0.0135081	3.81496e-75	74.4185
327	FHS	DNAmCystatinCAdjAge	CD4.naive	-0.0911194	0.0552393	0.100003	0.999987
649	JHS	DNAmCystatinCAdjAge	CD4.naive	-0.133369	0.0389628	0.000658454	3.18147
639	InChianti	DNAmCystatinCAdjAge	CD4.naive	-0.180341	0.0389718	4.48646e-06	5.3481
404	BLSA	DNAmCystatinCAdjAge	CD4.naive	-0.134485	0.0494224	0.00678841	2.16823
291	LBC21	DNAmCystatinCAdjAge	CD4.naive	-0.152507	0.0581354	0.00917032	2.03762
1441	LBC36	DNAmCystatinCAdjAge	CD4.naive	-0.127967	0.0261447	1.09625e-06	5.96009
1402	NAS	DNAmCystatinCAdjAge	CD4.naive	0.00994992	0.0267248	0.709718	0.148914
5153	Meta	DNAmCystatinCAdjAge	CD4.naive	-0.0978116	0.0138499	1.63812e-12	11.7857
327	FHS	DNAmCystatinCAdjAge	CD8.naive	-0.165852	0.0547018	0.00262541	2.5808
649	JHS	DNAmCystatinCAdjAge	CD8.naive	-0.156089	0.0388322	6.51665e-05	4.18598
639	InChianti	DNAmCystatinCAdjAge	CD8.naive	-0.1805	0.0389707	4.39886e-06	5.35666
404	BLSA	DNAmCystatinCAdjAge	CD8.naive	-0.0813614	0.0497101	0.102472	0.989394
291	LBC21	DNAmCystatinCAdjAge	CD8.naive	-0.256236	0.0568597	9.58382e-06	5.01846
1441	LBC36	DNAmCystatinCAdjAge	CD8.naive	-0.0456361	0.026334	0.0833148	1.07928
1402	NAS	DNAmCystatinCAdjAge	CD8.naive	-0.113166	0.0265544	2.1649e-05	4.66456
5153	Meta	DNAmCystatinCAdjAge	CD8.naive	-0.117834	0.0138277	1.57448e-17	16.8029
327	FHS	DNAmCystatinCAdjAge	CD8T	0.0640588	0.0553561	0.248035	0.605487
649	JHS	DNAmCystatinCAdjAge	CD8T	-0.0955567	0.0391342	0.0148821	1.82734
639	InChianti	DNAmCystatinCAdjAge	CD8T	0.0847429	0.0394789	0.0322073	1.49205
404	BLSA	DNAmCystatinCAdjAge	CD8T	-0.0406605	0.0498342	0.415031	0.381919
291	LBC21	DNAmCystatinCAdjAge	CD8T	-0.0320643	0.0587933	0.585917	0.232164
1441	LBC36	DNAmCystatinCAdjAge	CD8T	-0.0699892	0.0262968	0.00786572	2.10426
1402	NAS	DNAmCystatinCAdjAge	CD8T	0.171699	0.0263292	9.71246e-11	10.0127
5153	Meta	DNAmCystatinCAdjAge	CD8T	0.0257048	0.0138655	0.0637584	1.19546
327	FHS	DNAmCystatinCAdjAge	CD8.ex	0.195139	0.0544036	0.000386108	3.41329
649	JHS	DNAmCystatinCAdjAge	CD8.ex	0.181226	0.0386631	3.37715e-06	5.47145
639	InChianti	DNAmCystatinCAdjAge	CD8.ex	0.141871	0.0392207	0.000321326	3.49305
404	BLSA	DNAmCystatinCAdjAge	CD8.ex	0.194886	0.0489192	8.05074e-05	4.09416
291	LBC21	DNAmCystatinCAdjAge	CD8.ex	0.267519	0.0566796	3.68274e-06	5.43383
1441	LBC36	DNAmCystatinCAdjAge	CD8.ex	0.196098	0.0258496	5.88814e-14	13.23
1402	NAS	DNAmCystatinCAdjAge	CD8.ex	0.053732	0.0266875	0.0442661	1.35393
5153	Meta	DNAmCystatinCAdjAge	CD8.ex	0.153786	0.0137534	5.01196e-29	28.3
327	FHS	DNAmCystatinCAdjAge	NK	-0.136487	0.0549509	0.0135024	1.86959
649	JHS	DNAmCystatinCAdjAge	NK	-0.0758027	0.0392009	0.0535865	1.27094
639	InChianti	DNAmCystatinCAdjAge	NK	-0.0111453	0.039619	0.778563	0.108706
404	BLSA	DNAmCystatinCAdjAge	NK	-0.0615085	0.049781	0.217336	0.662869
291	LBC21	DNAmCystatinCAdjAge	NK	0.00440132	0.058823	0.940407	0.0266841
1441	LBC36	DNAmCystatinCAdjAge	NK	-0.0880875	0.026259	0.000815583	3.08853
1402	NAS	DNAmCystatinCAdjAge	NK	-0.0194903	0.026721	0.46588	0.331726
5153	Meta	DNAmCystatinCAdjAge	NK	-0.0542825	0.013918	9.61324e-05	4.01713
327	FHS	DNAmCystatinCAdjAge	PB	0.122328	0.0550534	0.0269718	1.56909
649	JHS	DNAmCystatinCAdjAge	PB	0.181495	0.0386611	3.26397e-06	5.48625
639	InChianti	DNAmCystatinCAdjAge	PB	0.140211	0.03923	0.000378029	3.42247
404	BLSA	DNAmCystatinCAdjAge	PB	0.290878	0.0477189	2.55691e-09	8.59228
291	LBC21	DNAmCystatinCAdjAge	PB	-0.0583215	0.0587234	0.321465	0.492866
1441	LBC36	DNAmCystatinCAdjAge	PB	0.0486212	0.0263303	0.0650122	1.18701
1402	NAS	DNAmCystatinCAdjAge	PB	-0.12793	0.0265065	1.54289e-06	5.81167
5153	Meta	DNAmCystatinCAdjAge	PB	0.0480153	0.0138097	0.000507218	3.29481
327	FHS	DNAmCystatinCAdjAge	Mono	0.0258125	0.0554515	0.641888	0.192541
649	JHS	DNAmCystatinCAdjAge	Mono	0.119538	0.0390322	0.00228569	2.64098
639	InChianti	DNAmCystatinCAdjAge	Mono	0.0381695	0.0395926	0.335384	0.474458
404	BLSA	DNAmCystatinCAdjAge	Mono	0.176816	0.0490896	0.000355449	3.44922
291	LBC21	DNAmCystatinCAdjAge	Mono	0.15745	0.0580898	0.00712094	2.14746
1441	LBC36	DNAmCystatinCAdjAge	Mono	0.167862	0.0259874	1.43486e-10	9.84319
1402	NAS	DNAmCystatinCAdjAge	Mono	0.0859232	0.0266273	0.00128042	2.89265
5153	Meta	DNAmCystatinCAdjAge	Mono	0.115087	0.0138383	9.05284e-17	16.0432
327	FHS	DNAmCystatinCAdjAge	Gran	0.217158	0.0541463	7.51976e-05	4.1238
649	JHS	DNAmCystatinCAdjAge	Gran	0.263848	0.0379209	8.48632e-12	11.0713
639	InChianti	DNAmCystatinCAdjAge	Gran	0.125981	0.0393058	0.00141742	2.8485
404	BLSA	DNAmCystatinCAdjAge	Gran	0.269037	0.0480365	3.96476e-08	7.40178
291	LBC21	DNAmCystatinCAdjAge	Gran	-0.0117699	0.0588195	0.841541	0.0749247
1441	LBC36	DNAmCystatinCAdjAge	Gran	0.153404	0.0260494	4.83047e-09	8.31601
1402	NAS	DNAmCystatinCAdjAge	Gran	-0.0328421	0.0267117	0.21909	0.659377
5153	Meta	DNAmCystatinCAdjAge	Gran	0.119728	0.0137603	3.29069e-18	17.4827
327	FHS	DNAmGDF15AdjAge	Bcell	-0.202107	0.0543253	0.000234368	3.6301
649	JHS	DNAmGDF15AdjAge	Bcell	-0.0970544	0.0391285	0.0133766	1.87365
639	InChianti	DNAmGDF15AdjAge	Bcell	-0.0959694	0.0394386	0.0152322	1.81724
404	BLSA	DNAmGDF15AdjAge	Bcell	-0.0732673	0.0497414	0.141543	0.849111
291	LBC21	DNAmGDF15AdjAge	Bcell	-0.00897433	0.0588212	0.878844	0.0560882
1441	LBC36	DNAmGDF15AdjAge	Bcell	-0.0876129	0.0262601	0.000870498	3.06023
1402	NAS	DNAmGDF15AdjAge	Bcell	0.0309558	0.0267133	0.246729	0.60778
5153	Meta	DNAmGDF15AdjAge	Bcell	-0.0597444	0.0138948	1.70983e-05	4.76705
327	FHS	DNAmGDF15AdjAge	CD4T	-0.310294	0.0527321	9.9437e-09	8.00245
649	JHS	DNAmGDF15AdjAge	CD4T	-0.106291	0.0390913	0.0067225	2.17247
639	InChianti	DNAmGDF15AdjAge	CD4T	-0.215608	0.0386895	3.70355e-08	7.43138
404	BLSA	DNAmGDF15AdjAge	CD4T	-0.19792	0.0488888	6.18849e-05	4.20842
291	LBC21	DNAmGDF15AdjAge	CD4T	0.100894	0.0585234	0.0857791	1.06662
1441	LBC36	DNAmGDF15AdjAge	CD4T	-0.0898211	0.0262549	0.000641111	3.19307
1402	NAS	DNAmGDF15AdjAge	CD4T	-0.129527	0.026501	1.13827e-06	5.94375
5153	Meta	DNAmGDF15AdjAge	CD4T	-0.131624	0.013779	1.26553e-21	20.8977
327	FHS	DNAmGDF15AdjAge	CD4.naive	-0.117943	0.0550829	0.0330017	1.48146
649	JHS	DNAmGDF15AdjAge	CD4.naive	-0.0741369	0.0392059	0.0590757	1.22859
639	InChianti	DNAmGDF15AdjAge	CD4.naive	-0.141159	0.0392247	0.000344598	3.46269
404	BLSA	DNAmGDF15AdjAge	CD4.naive	-0.0742234	0.0497379	0.136407	0.865162
291	LBC21	DNAmGDF15AdjAge	CD4.naive	-0.0887625	0.0585913	0.13088	0.883128
1441	LBC36	DNAmGDF15AdjAge	CD4.naive	-0.111086	0.0261983	2.37556e-05	4.62423
1402	NAS	DNAmGDF15AdjAge	CD4.naive	0.00280446	0.026726	0.916443	0.0378943
5153	Meta	DNAmGDF15AdjAge	CD4.naive	-0.0757596	0.0138907	4.92586e-08	7.30752
327	FHS	DNAmGDF15AdjAge	CD8.naive	-0.242731	0.0538111	9.03344e-06	5.04415
649	JHS	DNAmGDF15AdjAge	CD8.naive	-0.138648	0.0389344	0.000396446	3.40182
639	InChianti	DNAmGDF15AdjAge	CD8.naive	-0.127375	0.0392987	0.00125232	2.90228
404	BLSA	DNAmGDF15AdjAge	CD8.naive	-0.242673	0.0483846	7.9523e-07	6.09951
291	LBC21	DNAmGDF15AdjAge	CD8.naive	-0.328209	0.055565	9.78836e-09	8.00929
1441	LBC36	DNAmGDF15AdjAge	CD8.naive	-0.224047	0.0256913	7.48719e-18	17.1257
1402	NAS	DNAmGDF15AdjAge	CD8.naive	-0.230011	0.0260095	2.7364e-18	17.5628
5153	Meta	DNAmGDF15AdjAge	CD8.naive	-0.212564	0.0136123	5.69759e-55	54.2443
327	FHS	DNAmGDF15AdjAge	CD8T	0.031917	0.0554418	0.565226	0.247778
649	JHS	DNAmGDF15AdjAge	CD8T	-0.0400972	0.0392824	0.307758	0.511791
639	InChianti	DNAmGDF15AdjAge	CD8T	0.0437988	0.0395834	0.268931	0.570359
404	BLSA	DNAmGDF15AdjAge	CD8T	-0.102809	0.0496112	0.0388749	1.41033
291	LBC21	DNAmGDF15AdjAge	CD8T	0.113474	0.0584436	0.0531583	1.27443
1441	LBC36	DNAmGDF15AdjAge	CD8T	0.0342487	0.026346	0.193823	0.712595
1402	NAS	DNAmGDF15AdjAge	CD8T	0.149407	0.0264261	1.89979e-08	7.72129
5153	Meta	DNAmGDF15AdjAge	CD8T	0.051529	0.0138898	0.000207388	3.68322
327	FHS	DNAmGDF15AdjAge	CD8.ex	0.266005	0.0534715	1.06096e-06	5.9743
649	JHS	DNAmGDF15AdjAge	CD8.ex	0.123571	0.0390127	0.00161012	2.79314
639	InChianti	DNAmGDF15AdjAge	CD8.ex	0.142695	0.039216	0.000296224	3.52838
404	BLSA	DNAmGDF15AdjAge	CD8.ex	0.225088	0.0485956	4.90142e-06	5.30968
291	LBC21	DNAmGDF15AdjAge	CD8.ex	0.242656	0.0570654	2.86056e-05	4.54355
1441	LBC36	DNAmGDF15AdjAge	CD8.ex	0.270487	0.0253788	1.39872e-25	24.8543
1402	NAS	DNAmGDF15AdjAge	CD8.ex	0.228929	0.0260164	3.96751e-18	17.4015
5153	Meta	DNAmGDF15AdjAge	CD8.ex	0.220583	0.0135862	2.81516e-59	58.5505
327	FHS	DNAmGDF15AdjAge	NK	-0.213922	0.0541859	9.66725e-05	4.0147
649	JHS	DNAmGDF15AdjAge	NK	-0.0396952	0.0392831	0.312638	0.504959
639	InChianti	DNAmGDF15AdjAge	NK	-0.13469	0.0392604	0.000640952	3.19317
404	BLSA	DNAmGDF15AdjAge	NK	-0.00562527	0.0498747	0.910255	0.040837
291	LBC21	DNAmGDF15AdjAge	NK	0.0600578	0.0587173	0.307244	0.512517
1441	LBC36	DNAmGDF15AdjAge	NK	-0.00767178	0.0263607	0.771069	0.112907
1402	NAS	DNAmGDF15AdjAge	NK	0.0541536	0.0266869	0.042625	1.37034
5153	Meta	DNAmGDF15AdjAge	NK	-0.0204556	0.0139041	0.14124	0.850043
327	FHS	DNAmGDF15AdjAge	PB	0.242546	0.0538137	9.18136e-06	5.03709
649	JHS	DNAmGDF15AdjAge	PB	0.0162515	0.0393089	0.679428	0.167857
639	InChianti	DNAmGDF15AdjAge	PB	0.15043	0.0391706	0.00013512	3.86928
404	BLSA	DNAmGDF15AdjAge	PB	0.181576	0.0490464	0.000243635	3.61326
291	LBC21	DNAmGDF15AdjAge	PB	-0.173887	0.0579274	0.00291825	2.53488
1441	LBC36	DNAmGDF15AdjAge	PB	-0.0453815	0.0263343	0.0850516	1.07032
1402	NAS	DNAmGDF15AdjAge	PB	-0.0106425	0.0267246	0.690523	0.160822
5153	Meta	DNAmGDF15AdjAge	PB	0.0260836	0.0138674	0.0599817	1.22198
327	FHS	DNAmGDF15AdjAge	Mono	-0.0437722	0.0554169	0.430179	0.366351
649	JHS	DNAmGDF15AdjAge	Mono	0.0237097	0.039303	0.546551	0.262369
639	InChianti	DNAmGDF15AdjAge	Mono	-0.00223839	0.0396213	0.954966	0.0200123
404	BLSA	DNAmGDF15AdjAge	Mono	0.0304956	0.0498523	0.541069	0.266747
291	LBC21	DNAmGDF15AdjAge	Mono	0.198382	0.0576544	0.000665356	3.17695
1441	LBC36	DNAmGDF15AdjAge	Mono	0.0646462	0.0263063	0.0141104	1.85046
1402	NAS	DNAmGDF15AdjAge	Mono	-0.000849758	0.0267261	0.97464	0.0111558
5153	Meta	DNAmGDF15AdjAge	Mono	0.0317643	0.0139235	0.0225281	1.64727
327	FHS	DNAmGDF15AdjAge	Gran	0.31909	0.0525703	3.568e-09	8.44758
649	JHS	DNAmGDF15AdjAge	Gran	0.11215	0.039066	0.00422843	2.37382
639	InChianti	DNAmGDF15AdjAge	Gran	0.180151	0.0389732	4.59297e-06	5.33791
404	BLSA	DNAmGDF15AdjAge	Gran	0.173469	0.0491193	0.000460955	3.33634
291	LBC21	DNAmGDF15AdjAge	Gran	-0.139638	0.0582472	0.0171496	1.76575
1441	LBC36	DNAmGDF15AdjAge	Gran	0.0266219	0.0263521	0.312551	0.50508
1402	NAS	DNAmGDF15AdjAge	Gran	-0.0299865	0.0267141	0.261844	0.581958
5153	Meta	DNAmGDF15AdjAge	Gran	0.0640283	0.013833	3.68057e-06	5.43408
327	FHS	DNAmLeptinAdjAge	Bcell	0.0259561	0.0554513	0.640035	0.193796
649	JHS	DNAmLeptinAdjAge	Bcell	0.0962509	0.0391315	0.0141667	1.84873
639	InChianti	DNAmLeptinAdjAge	Bcell	0.00905932	0.0396198	0.819209	0.0866051
404	BLSA	DNAmLeptinAdjAge	Bcell	-0.0204413	0.049865	0.682074	0.166169
291	LBC21	DNAmLeptinAdjAge	Bcell	-0.181547	0.057846	0.00187393	2.72725
1441	LBC36	DNAmLeptinAdjAge	Bcell	0.00716579	0.0263608	0.785788	0.104695
1402	NAS	DNAmLeptinAdjAge	Bcell	0.0420929	0.0267024	0.115167	0.938673
5153	Meta	DNAmLeptinAdjAge	Bcell	0.016274	0.013924	0.242493	0.6153
327	FHS	DNAmLeptinAdjAge	CD4T	0.0794822	0.0552945	0.151557	0.819424
649	JHS	DNAmLeptinAdjAge	CD4T	0.189723	0.0386	1.12595e-06	5.94848
639	InChianti	DNAmLeptinAdjAge	CD4T	0.114735	0.0393598	0.00368141	2.43399
404	BLSA	DNAmLeptinAdjAge	CD4T	0.0648268	0.0497706	0.193487	0.713349
291	LBC21	DNAmLeptinAdjAge	CD4T	-0.0573067	0.0587269	0.329971	0.481524
1441	LBC36	DNAmLeptinAdjAge	CD4T	0.0626391	0.0263097	0.0174029	1.75938
1402	NAS	DNAmLeptinAdjAge	CD4T	0.0903848	0.0266167	0.000703473	3.15275
5153	Meta	DNAmLeptinAdjAge	CD4T	0.087612	0.0138761	2.72121e-10	9.56524
327	FHS	DNAmLeptinAdjAge	CD4.naive	0.0120766	0.055466	0.827777	0.0820868
649	JHS	DNAmLeptinAdjAge	CD4.naive	0.124901	0.0390062	0.00143129	2.84427
639	InChianti	DNAmLeptinAdjAge	CD4.naive	0.0667842	0.039533	0.091646	1.03789
404	BLSA	DNAmLeptinAdjAge	CD4.naive	-0.0700703	0.0497529	0.159795	0.796436
291	LBC21	DNAmLeptinAdjAge	CD4.naive	-0.0773281	0.0586474	0.188371	0.724985
1441	LBC36	DNAmLeptinAdjAge	CD4.naive	-0.0770764	0.026283	0.00341507	2.4666
1402	NAS	DNAmLeptinAdjAge	CD4.naive	-0.0577309	0.0266815	0.030656	1.51348
5153	Meta	DNAmLeptinAdjAge	CD4.naive	-0.0221912	0.0139088	0.110606	0.956223
327	FHS	DNAmLeptinAdjAge	CD8.naive	-0.0656664	0.0553503	0.236339	0.626464
649	JHS	DNAmLeptinAdjAge	CD8.naive	0.045172	0.0392739	0.250495	0.601201
639	InChianti	DNAmLeptinAdjAge	CD8.naive	0.290884	0.0379081	6.30919e-14	13.2
404	BLSA	DNAmLeptinAdjAge	CD8.naive	-0.282591	0.0478426	7.44083e-09	8.12838
291	LBC21	DNAmLeptinAdjAge	CD8.naive	0.0528926	0.0587412	0.368639	0.433399
1441	LBC36	DNAmLeptinAdjAge	CD8.naive	-0.109572	0.0262027	3.06796e-05	4.51315
1402	NAS	DNAmLeptinAdjAge	CD8.naive	-0.0186116	0.0267215	0.486229	0.313159
5153	Meta	DNAmLeptinAdjAge	CD8.naive	-0.0158948	0.0137957	0.249258	0.603351
327	FHS	DNAmLeptinAdjAge	CD8T	0.0122077	0.0554659	0.825936	0.0830535
649	JHS	DNAmLeptinAdjAge	CD8T	0.062311	0.0392377	0.112766	0.947823
639	InChianti	DNAmLeptinAdjAge	CD8T	-0.0744008	0.0395116	0.0601545	1.22073
404	BLSA	DNAmLeptinAdjAge	CD8T	-0.0355256	0.049844	0.476422	0.322008
291	LBC21	DNAmLeptinAdjAge	CD8T	-0.0980725	0.05854	0.0949552	1.02248
1441	LBC36	DNAmLeptinAdjAge	CD8T	0.0382553	0.0263422	0.146652	0.833713
1402	NAS	DNAmLeptinAdjAge	CD8T	0.0122685	0.0267241	0.646247	0.189601
5153	Meta	DNAmLeptinAdjAge	CD8T	0.00508165	0.0139336	0.715333	0.145492
327	FHS	DNAmLeptinAdjAge	CD8.ex	0.068063	0.0553414	0.219633	0.658302
649	JHS	DNAmLeptinAdjAge	CD8.ex	-0.0827286	0.0391793	0.0351089	1.45458
639	InChianti	DNAmLeptinAdjAge	CD8.ex	-0.223341	0.0386206	1.15044e-08	7.93914
404	BLSA	DNAmLeptinAdjAge	CD8.ex	0.158976	0.0492412	0.00134644	2.87081
291	LBC21	DNAmLeptinAdjAge	CD8.ex	0.206983	0.0575497	0.000379084	3.42126
1441	LBC36	DNAmLeptinAdjAge	CD8.ex	0.169331	0.0259808	9.86061e-11	10.0061
1402	NAS	DNAmLeptinAdjAge	CD8.ex	-0.00305509	0.026726	0.909007	0.0414326
5153	Meta	DNAmLeptinAdjAge	CD8.ex	0.036847	0.0138089	0.00762228	2.11791
327	FHS	DNAmLeptinAdjAge	NK	0.0251833	0.0554524	0.650029	0.187067
649	JHS	DNAmLeptinAdjAge	NK	0.00394905	0.0393138	0.920018	0.0362035
639	InChianti	DNAmLeptinAdjAge	NK	0.0541952	0.0395632	0.17122	0.766444
404	BLSA	DNAmLeptinAdjAge	NK	0.171253	0.0491387	0.000546138	3.2627
291	LBC21	DNAmLeptinAdjAge	NK	0.0476897	0.0587566	0.417661	0.379176
1441	LBC36	DNAmLeptinAdjAge	NK	0.0500396	0.0263284	0.0575554	1.23991
1402	NAS	DNAmLeptinAdjAge	NK	0.105987	0.0265756	7.00364e-05	4.15468
5153	Meta	DNAmLeptinAdjAge	NK	0.06811	0.0139031	9.63693e-07	6.01606
327	FHS	DNAmLeptinAdjAge	PB	-0.112288	0.0551192	0.042442	1.3722
649	JHS	DNAmLeptinAdjAge	PB	-0.193331	0.0385723	6.9556e-07	6.15767
639	InChianti	DNAmLeptinAdjAge	PB	-0.0283238	0.0396055	0.47478	0.323508
404	BLSA	DNAmLeptinAdjAge	PB	-0.0462065	0.0498222	0.354261	0.450677
291	LBC21	DNAmLeptinAdjAge	PB	-0.00443641	0.058823	0.939933	0.0269031
1441	LBC36	DNAmLeptinAdjAge	PB	-0.152753	0.0260521	5.61726e-09	8.25048
1402	NAS	DNAmLeptinAdjAge	PB	-0.103288	0.0265832	0.000106899	3.97103
5153	Meta	DNAmLeptinAdjAge	PB	-0.110379	0.0138421	1.53427e-15	14.8141
327	FHS	DNAmLeptinAdjAge	Mono	-0.0883038	0.0552533	0.110979	0.95476
649	JHS	DNAmLeptinAdjAge	Mono	-0.0349535	0.03929	0.373996	0.427133
639	InChianti	DNAmLeptinAdjAge	Mono	-0.117748	0.0393458	0.00287269	2.54171
404	BLSA	DNAmLeptinAdjAge	Mono	-0.0176963	0.0498677	0.722877	0.140936
291	LBC21	DNAmLeptinAdjAge	Mono	-0.0156244	0.0588163	0.790701	0.101988
1441	LBC36	DNAmLeptinAdjAge	Mono	0.0623736	0.0263101	0.0178853	1.7475
1402	NAS	DNAmLeptinAdjAge	Mono	-0.0587935	0.0266799	0.0277104	1.55736
5153	Meta	DNAmLeptinAdjAge	Mono	-0.0255232	0.0139185	0.0666897	1.17594
327	FHS	DNAmLeptinAdjAge	Gran	-0.0295566	0.0554458	0.594348	0.225959
649	JHS	DNAmLeptinAdjAge	Gran	-0.157272	0.0388248	5.72385e-05	4.24231
639	InChianti	DNAmLeptinAdjAge	Gran	-0.0341273	0.0395984	0.389102	0.409936
404	BLSA	DNAmLeptinAdjAge	Gran	-0.079841	0.0497162	0.109074	0.96228
291	LBC21	DNAmLeptinAdjAge	Gran	0.0583778	0.0587232	0.320997	0.493499
1441	LBC36	DNAmLeptinAdjAge	Gran	-0.17176	0.0259697	5.26358e-11	10.2787
1402	NAS	DNAmLeptinAdjAge	Gran	-0.0941463	0.0266074	0.000415802	3.38111
5153	Meta	DNAmLeptinAdjAge	Gran	-0.103282	0.0138459	8.69026e-14	13.061
327	FHS	DNAmlogCRPAdjAge	Bcell	-0.200215	0.0543469	0.000268837	3.57051
649	JHS	DNAmlogCRPAdjAge	Bcell	-0.387087	0.0362493	1.25559e-24	23.9012
639	InChianti	DNAmlogCRPAdjAge	Bcell	-0.203596	0.0387916	2.09197e-07	6.67944
404	BLSA	DNAmlogCRPAdjAge	Bcell	-0.288847	0.0477495	3.33318e-09	8.47714
291	LBC21	DNAmlogCRPAdjAge	Bcell	-0.225897	0.057303	0.000101366	3.99411
1441	LBC36	DNAmlogCRPAdjAge	Bcell	-0.227029	0.0256731	2.66603e-18	17.5741
1402	NAS	DNAmlogCRPAdjAge	Bcell	-0.167004	0.026628	4.77526e-10	9.321
5153	Meta	DNAmlogCRPAdjAge	Bcell	-0.234255	0.0135646	7.97638e-67	66.0982
327	FHS	DNAmlogCRPAdjAge	CD4T	-0.160582	0.0547502	0.00359557	2.44423
649	JHS	DNAmlogCRPAdjAge	CD4T	-0.31647	0.0372934	1.45784e-16	15.8363
639	InChianti	DNAmlogCRPAdjAge	CD4T	-0.278135	0.0380581	8.14004e-13	12.0894
404	BLSA	DNAmlogCRPAdjAge	CD4T	-0.256397	0.0482082	1.7402e-07	6.7594
291	LBC21	DNAmlogCRPAdjAge	CD4T	-0.311593	0.055895	5.69131e-08	7.24479
1441	LBC36	DNAmlogCRPAdjAge	CD4T	-0.19925	0.0258329	2.28046e-14	13.642
1402	NAS	DNAmlogCRPAdjAge	CD4T	-0.173117	0.0265995	1.06349e-10	9.97327
5153	Meta	DNAmlogCRPAdjAge	CD4T	-0.226901	0.0136017	1.77799e-62	61.7501
327	FHS	DNAmlogCRPAdjAge	CD4.naive	-0.0910494	0.0552396	0.100265	0.99885
649	JHS	DNAmlogCRPAdjAge	CD4.naive	-0.253414	0.0380308	5.72955e-11	10.2419
639	InChianti	DNAmlogCRPAdjAge	CD4.naive	-0.199324	0.0388264	3.77851e-07	6.42268
404	BLSA	DNAmlogCRPAdjAge	CD4.naive	-0.169	0.0491581	0.000647501	3.18876
291	LBC21	DNAmlogCRPAdjAge	CD4.naive	0.00810962	0.0588216	0.890441	0.050395
1441	LBC36	DNAmlogCRPAdjAge	CD4.naive	0.0281976	0.026351	0.284764	0.545516
1402	NAS	DNAmlogCRPAdjAge	CD4.naive	-0.135276	0.0267591	4.87719e-07	6.31183
5153	Meta	DNAmlogCRPAdjAge	CD4.naive	-0.105931	0.0138382	1.93362e-14	13.7136
327	FHS	DNAmlogCRPAdjAge	CD8.naive	-0.0839817	0.0552741	0.129642	0.887255
649	JHS	DNAmlogCRPAdjAge	CD8.naive	-0.240279	0.0381623	5.62907e-10	9.24956
639	InChianti	DNAmlogCRPAdjAge	CD8.naive	-0.301247	0.0377809	7.15881e-15	14.1452
404	BLSA	DNAmlogCRPAdjAge	CD8.naive	-0.215631	0.0487021	1.22974e-05	4.91019
291	LBC21	DNAmlogCRPAdjAge	CD8.naive	0.111351	0.0584577	0.057797	1.2381
1441	LBC36	DNAmlogCRPAdjAge	CD8.naive	0.0941409	0.0262444	0.000345594	3.46143
1402	NAS	DNAmlogCRPAdjAge	CD8.naive	-0.097253	0.0268793	0.00030751	3.51214
5153	Meta	DNAmlogCRPAdjAge	CD8.naive	-0.0873312	0.013782	2.34874e-10	9.62917
327	FHS	DNAmlogCRPAdjAge	CD8T	-0.108808	0.0551407	0.0493108	1.30706
649	JHS	DNAmlogCRPAdjAge	CD8T	-0.210602	0.0384323	6.10485e-08	7.21433
639	InChianti	DNAmlogCRPAdjAge	CD8T	-0.122239	0.0393243	0.00196437	2.70678
404	BLSA	DNAmlogCRPAdjAge	CD8T	-0.214411	0.0487155	1.38069e-05	4.8599
291	LBC21	DNAmlogCRPAdjAge	CD8T	0.0534209	0.0587395	0.363868	0.439056
1441	LBC36	DNAmlogCRPAdjAge	CD8T	-0.0212386	0.0263555	0.420463	0.376272
1402	NAS	DNAmlogCRPAdjAge	CD8T	-0.160298	0.0266581	2.33017e-09	8.63261
5153	Meta	DNAmlogCRPAdjAge	CD8T	-0.112928	0.0138534	3.5902e-16	15.4449
327	FHS	DNAmlogCRPAdjAge	CD8.ex	0.128081	0.0550132	0.020515	1.68793
649	JHS	DNAmlogCRPAdjAge	CD8.ex	0.153782	0.0388464	8.37077e-05	4.07723
639	InChianti	DNAmlogCRPAdjAge	CD8.ex	0.204021	0.0387881	1.97101e-07	6.70531
404	BLSA	DNAmlogCRPAdjAge	CD8.ex	0.201329	0.0488542	4.58295e-05	4.33886
291	LBC21	DNAmlogCRPAdjAge	CD8.ex	0.0280063	0.0588005	0.634225	0.197757
1441	LBC36	DNAmlogCRPAdjAge	CD8.ex	0.0680269	0.0263004	0.00979203	2.00913
1402	NAS	DNAmlogCRPAdjAge	CD8.ex	0.0636812	0.0269525	0.0182803	1.73802
5153	Meta	DNAmlogCRPAdjAge	CD8.ex	0.107608	0.0138832	9.12215e-15	14.0399
327	FHS	DNAmlogCRPAdjAge	NK	-0.313449	0.0526746	6.91062e-09	8.16048
649	JHS	DNAmlogCRPAdjAge	NK	-0.179712	0.038674	4.08549e-06	5.38876
639	InChianti	DNAmlogCRPAdjAge	NK	-0.170449	0.0390416	1.47776e-05	4.8304
404	BLSA	DNAmlogCRPAdjAge	NK	-0.154403	0.0492774	0.00185495	2.73167
291	LBC21	DNAmlogCRPAdjAge	NK	-0.215314	0.0574438	0.000215026	3.66751
1441	LBC36	DNAmlogCRPAdjAge	NK	-0.18654	0.0258988	9.48664e-13	12.0229
1402	NAS	DNAmlogCRPAdjAge	NK	-0.257341	0.0260977	3.30954e-22	21.4802
5153	Meta	DNAmlogCRPAdjAge	NK	-0.210808	0.0136602	9.92269e-54	53.0034
327	FHS	DNAmlogCRPAdjAge	PB	0.187683	0.0544843	0.000646608	3.18936
649	JHS	DNAmlogCRPAdjAge	PB	0.292968	0.037589	2.599e-14	13.5852
639	InChianti	DNAmlogCRPAdjAge	PB	0.342508	0.0372249	5.00847e-19	18.3003
404	BLSA	DNAmlogCRPAdjAge	PB	0.274165	0.0479644	2.12807e-08	7.67201
291	LBC21	DNAmlogCRPAdjAge	PB	0.366731	0.0547251	1.07983e-10	9.96664
1441	LBC36	DNAmlogCRPAdjAge	PB	0.261188	0.0254464	6.65379e-24	23.1769
1402	NAS	DNAmlogCRPAdjAge	PB	0.298191	0.0257786	1.35639e-29	28.8676
5153	Meta	DNAmlogCRPAdjAge	PB	0.288584	0.0133822	3.84448e-103	102.415
327	FHS	DNAmlogCRPAdjAge	Mono	0.0454549	0.0554127	0.412647	0.384421
649	JHS	DNAmlogCRPAdjAge	Mono	0.183994	0.0386429	2.37414e-06	5.62449
639	InChianti	DNAmlogCRPAdjAge	Mono	0.0901425	0.0394601	0.0226764	1.64443
404	BLSA	DNAmlogCRPAdjAge	Mono	0.124597	0.0494868	0.0121974	1.91373
291	LBC21	DNAmlogCRPAdjAge	Mono	0.0913057	0.0585778	0.12016	0.920241
1441	LBC36	DNAmlogCRPAdjAge	Mono	0.00770405	0.0263607	0.770134	0.113434
1402	NAS	DNAmlogCRPAdjAge	Mono	0.168676	0.0266203	3.18412e-10	9.49701
5153	Meta	DNAmlogCRPAdjAge	Mono	0.100724	0.0138841	4.02853e-13	12.3949
327	FHS	DNAmlogCRPAdjAge	Gran	0.316366	0.0526209	4.91832e-09	8.30818
649	JHS	DNAmlogCRPAdjAge	Gran	0.405395	0.0359386	4.57985e-27	26.3391
639	InChianti	DNAmlogCRPAdjAge	Gran	0.33234	0.0373693	6.07509e-18	17.2164
404	BLSA	DNAmlogCRPAdjAge	Gran	0.361757	0.0464975	6.1728e-14	13.2095
291	LBC21	DNAmlogCRPAdjAge	Gran	0.318458	0.055761	2.78591e-08	7.55503
1441	LBC36	DNAmlogCRPAdjAge	Gran	0.27954	0.0253105	2.80812e-27	26.5516
1402	NAS	DNAmlogCRPAdjAge	Gran	0.355853	0.0252395	2.95631e-42	41.5293
5153	Meta	DNAmlogCRPAdjAge	Gran	0.334842	0.0131689	1.27453e-142	141.895
327	FHS	DNAmlogA1CAdjAge	Bcell	-0.144665	0.0548865	0.00879901	2.05557
649	JHS	DNAmlogA1CAdjAge	Bcell	-0.150178	0.0388682	0.000122897	3.91046
639	InChianti	DNAmlogA1CAdjAge	Bcell	-0.0808679	0.0394917	0.0409969	1.38725
404	BLSA	DNAmlogA1CAdjAge	Bcell	-0.0612805	0.0497817	0.219049	0.659459
291	LBC21	DNAmlogA1CAdjAge	Bcell	-0.0322719	0.0587929	0.583493	0.233965
1441	LBC36	DNAmlogA1CAdjAge	Bcell	-0.00761112	0.0263607	0.77283	0.111916
1402	NAS	DNAmlogA1CAdjAge	Bcell	-0.0337676	0.0269919	0.211137	0.675435
5153	Meta	DNAmlogA1CAdjAge	Bcell	-0.0565509	0.0139488	5.03143e-05	4.29831
327	FHS	DNAmlogA1CAdjAge	CD4T	0.133551	0.0549731	0.0156662	1.80504
649	JHS	DNAmlogA1CAdjAge	CD4T	-0.00158595	0.039314	0.967834	0.0141991
639	InChianti	DNAmlogA1CAdjAge	CD4T	-0.00458802	0.039621	0.907849	0.0419862
404	BLSA	DNAmlogA1CAdjAge	CD4T	0.0972256	0.0496392	0.0508452	1.29375
291	LBC21	DNAmlogA1CAdjAge	CD4T	-0.0471871	0.058758	0.422591	0.374079
1441	LBC36	DNAmlogA1CAdjAge	CD4T	0.0181643	0.0263571	0.490834	0.309065
1402	NAS	DNAmlogA1CAdjAge	CD4T	0.00193035	0.0270073	0.94303	0.0254744
5153	Meta	DNAmlogA1CAdjAge	CD4T	0.0185177	0.0139742	0.185126	0.732532
327	FHS	DNAmlogA1CAdjAge	CD4.naive	0.156572	0.0547859	0.00453971	2.34297
649	JHS	DNAmlogA1CAdjAge	CD4.naive	-0.0168409	0.0393085	0.668481	0.174911
639	InChianti	DNAmlogA1CAdjAge	CD4.naive	-0.0438638	0.0395833	0.26822	0.571508
404	BLSA	DNAmlogA1CAdjAge	CD4.naive	0.0857467	0.0496918	0.0851929	1.0696
291	LBC21	DNAmlogA1CAdjAge	CD4.naive	-0.0226741	0.0588084	0.700106	0.154836
1441	LBC36	DNAmlogA1CAdjAge	CD4.naive	0.0157774	0.0263582	0.549549	0.259994
1402	NAS	DNAmlogA1CAdjAge	CD4.naive	-0.00305783	0.0270072	0.909871	0.0410204
5153	Meta	DNAmlogA1CAdjAge	CD4.naive	0.0117033	0.0139712	0.402215	0.395542
327	FHS	DNAmlogA1CAdjAge	CD8.naive	0.0521266	0.0553946	0.347401	0.459168
649	JHS	DNAmlogA1CAdjAge	CD8.naive	0.00658842	0.0393132	0.86696	0.0620011
639	InChianti	DNAmlogA1CAdjAge	CD8.naive	-0.172331	0.0390287	1.18383e-05	4.92671
404	BLSA	DNAmlogA1CAdjAge	CD8.naive	-0.0879756	0.0496821	0.0773564	1.1115
291	LBC21	DNAmlogA1CAdjAge	CD8.naive	0.0207659	0.0588108	0.724274	0.140097
1441	LBC36	DNAmlogA1CAdjAge	CD8.naive	0.00341087	0.0263613	0.897068	0.0471747
1402	NAS	DNAmlogA1CAdjAge	CD8.naive	-0.0680853	0.0269446	0.0116204	1.93478
5153	Meta	DNAmlogA1CAdjAge	CD8.naive	-0.0409321	0.0139481	0.00333978	2.47628
327	FHS	DNAmlogA1CAdjAge	CD8T	-0.118898	0.0550765	0.0315987	1.50033
649	JHS	DNAmlogA1CAdjAge	CD8T	0.0118954	0.0393113	0.762295	0.117877
639	InChianti	DNAmlogA1CAdjAge	CD8T	-0.0345446	0.0395978	0.383326	0.416432
404	BLSA	DNAmlogA1CAdjAge	CD8T	-0.0680375	0.0497599	0.17229	0.763739
291	LBC21	DNAmlogA1CAdjAge	CD8T	-0.0542765	0.0587368	0.356225	0.448276
1441	LBC36	DNAmlogA1CAdjAge	CD8T	0.0145082	0.0263587	0.582122	0.234986
1402	NAS	DNAmlogA1CAdjAge	CD8T	-0.0375211	0.0269883	0.164672	0.783381
5153	Meta	DNAmlogA1CAdjAge	CD8T	-0.0248752	0.0139748	0.0750752	1.1245
327	FHS	DNAmlogA1CAdjAge	CD8.ex	-0.118047	0.0550822	0.0328469	1.4835
649	JHS	DNAmlogA1CAdjAge	CD8.ex	-0.0118359	0.0393113	0.76345	0.117219
639	InChianti	DNAmlogA1CAdjAge	CD8.ex	0.0681064	0.0395294	0.085387	1.06861
404	BLSA	DNAmlogA1CAdjAge	CD8.ex	-0.0511836	0.0498101	0.304768	0.51603
291	LBC21	DNAmlogA1CAdjAge	CD8.ex	-0.0245494	0.0588058	0.676648	0.169637
1441	LBC36	DNAmlogA1CAdjAge	CD8.ex	-0.0166798	0.0263578	0.52695	0.27823
1402	NAS	DNAmlogA1CAdjAge	CD8.ex	-0.0253196	0.0269986	0.348507	0.457789
5153	Meta	DNAmlogA1CAdjAge	CD8.ex	-0.0174709	0.0139752	0.211251	0.675201
327	FHS	DNAmlogA1CAdjAge	NK	-0.20549	0.0542862	0.00018279	3.73805
649	JHS	DNAmlogA1CAdjAge	NK	-0.0593716	0.0392447	0.130804	0.883377
639	InChianti	DNAmlogA1CAdjAge	NK	0.0184739	0.0396147	0.641132	0.193053
404	BLSA	DNAmlogA1CAdjAge	NK	0.0114665	0.0498722	0.818273	0.0871018
291	LBC21	DNAmlogA1CAdjAge	NK	0.0342244	0.0587891	0.560915	0.251103
1441	LBC36	DNAmlogA1CAdjAge	NK	-0.0611086	0.0263122	0.0203481	1.69148
1402	NAS	DNAmlogA1CAdjAge	NK	-0.0481664	0.026976	0.074396	1.12845
5153	Meta	DNAmlogA1CAdjAge	NK	-0.0460391	0.0139539	0.000969011	3.01367
327	FHS	DNAmlogA1CAdjAge	PB	0.0650587	0.0553525	0.240714	0.618499
649	JHS	DNAmlogA1CAdjAge	PB	0.0467723	0.039271	0.234085	0.630627
639	InChianti	DNAmlogA1CAdjAge	PB	0.106341	0.0393968	0.00713451	2.14664
404	BLSA	DNAmlogA1CAdjAge	PB	-0.00437442	0.049875	0.930153	0.0314458
291	LBC21	DNAmlogA1CAdjAge	PB	0.114541	0.0584364	0.0509457	1.29289
1441	LBC36	DNAmlogA1CAdjAge	PB	0.00885603	0.0263604	0.736951	0.132562
1402	NAS	DNAmlogA1CAdjAge	PB	0.0767663	0.0269276	0.00442571	2.35402
5153	Meta	DNAmlogA1CAdjAge	PB	0.0527018	0.0139588	0.000159677	3.79676
327	FHS	DNAmlogA1CAdjAge	Mono	-0.0284539	0.0554476	0.608183	0.215966
649	JHS	DNAmlogA1CAdjAge	Mono	-0.0564896	0.0392513	0.150584	0.822222
639	InChianti	DNAmlogA1CAdjAge	Mono	0.0533707	0.039565	0.177836	0.749981
404	BLSA	DNAmlogA1CAdjAge	Mono	0.0129058	0.0498713	0.795936	0.0991217
291	LBC21	DNAmlogA1CAdjAge	Mono	0.0207612	0.0588109	0.724333	0.140062
1441	LBC36	DNAmlogA1CAdjAge	Mono	-0.0184887	0.026357	0.483121	0.315944
1402	NAS	DNAmlogA1CAdjAge	Mono	-0.0366035	0.0269892	0.17525	0.756342
5153	Meta	DNAmlogA1CAdjAge	Mono	-0.0151465	0.01398	0.27861	0.555003
327	FHS	DNAmlogA1CAdjAge	Gran	0.116911	0.0550896	0.0345771	1.46121
649	JHS	DNAmlogA1CAdjAge	Gran	0.0880613	0.0391613	0.0248685	1.60435
639	InChianti	DNAmlogA1CAdjAge	Gran	0.0320819	0.039601	0.418169	0.378648
404	BLSA	DNAmlogA1CAdjAge	Gran	0.00728522	0.0498741	0.883938	0.0535783
291	LBC21	DNAmlogA1CAdjAge	Gran	0.0384817	0.05878	0.513198	0.289715
1441	LBC36	DNAmlogA1CAdjAge	Gran	-0.0156484	0.0263582	0.552819	0.257417
1402	NAS	DNAmlogA1CAdjAge	Gran	0.109746	0.0268442	4.59896e-05	4.33734
5153	Meta	DNAmlogA1CAdjAge	Gran	0.0506526	0.0139513	0.000282683	3.5487
327	FHS	DNAmPAI1AdjAge	Bcell	-0.212242	0.0542063	0.000109978	3.9587
649	JHS	DNAmPAI1AdjAge	Bcell	-0.123071	0.0390152	0.00168258	2.77402
639	InChianti	DNAmPAI1AdjAge	Bcell	-0.0951572	0.0394417	0.0161204	1.79262
404	BLSA	DNAmPAI1AdjAge	Bcell	-0.221256	0.0486393	7.1504e-06	5.14567
291	LBC21	DNAmPAI1AdjAge	Bcell	-0.079014	0.0586396	0.178891	0.747412
1441	LBC36	DNAmPAI1AdjAge	Bcell	-0.175777	0.025951	1.82736e-11	10.7382
1402	NAS	DNAmPAI1AdjAge	Bcell	-0.0690915	0.0266623	0.00965914	2.01506
5153	Meta	DNAmPAI1AdjAge	Bcell	-0.13135	0.0138076	1.85548e-21	20.7315
327	FHS	DNAmPAI1AdjAge	CD4T	-0.0537836	0.0553897	0.332269	0.47851
649	JHS	DNAmPAI1AdjAge	CD4T	-0.0642618	0.0392328	0.101916	0.991758
639	InChianti	DNAmPAI1AdjAge	CD4T	-0.065749	0.0395357	0.0967985	1.01413
404	BLSA	DNAmPAI1AdjAge	CD4T	-0.0451861	0.0498245	0.365	0.437707
291	LBC21	DNAmPAI1AdjAge	CD4T	-0.0361167	0.0587852	0.539444	0.268054
1441	LBC36	DNAmPAI1AdjAge	CD4T	-0.0410088	0.0263393	0.119703	0.921893
1402	NAS	DNAmPAI1AdjAge	CD4T	0.0012223	0.0267261	0.963528	0.0161355
5153	Meta	DNAmPAI1AdjAge	CD4T	-0.0363948	0.013936	0.0090128	2.04514
327	FHS	DNAmPAI1AdjAge	CD4.naive	0.102201	0.0551796	0.0649116	1.18768
649	JHS	DNAmPAI1AdjAge	CD4.naive	-0.0047245	0.0393136	0.904382	0.0436481
639	InChianti	DNAmPAI1AdjAge	CD4.naive	-0.0177583	0.0396152	0.654111	0.184348
404	BLSA	DNAmPAI1AdjAge	CD4.naive	0.0622182	0.0497788	0.212066	0.673529
291	LBC21	DNAmPAI1AdjAge	CD4.naive	0.0555993	0.0587325	0.344607	0.462676
1441	LBC36	DNAmPAI1AdjAge	CD4.naive	0.0455282	0.0263341	0.0840473	1.07548
1402	NAS	DNAmPAI1AdjAge	CD4.naive	0.0785116	0.0266436	0.00326466	2.48616
5153	Meta	DNAmPAI1AdjAge	CD4.naive	0.0458949	0.0139255	0.000981624	3.00805
327	FHS	DNAmPAI1AdjAge	CD8.naive	-0.0144757	0.0554642	0.794264	0.100035
649	JHS	DNAmPAI1AdjAge	CD8.naive	0.00275468	0.0393139	0.94416	0.0249542
639	InChianti	DNAmPAI1AdjAge	CD8.naive	-0.0893761	0.0394629	0.0238592	1.62234
404	BLSA	DNAmPAI1AdjAge	CD8.naive	-0.00325554	0.0498752	0.947989	0.0231969
291	LBC21	DNAmPAI1AdjAge	CD8.naive	-0.0279672	0.0588005	0.634699	0.197432
1441	LBC36	DNAmPAI1AdjAge	CD8.naive	0.0197026	0.0263564	0.454856	0.342126
1402	NAS	DNAmPAI1AdjAge	CD8.naive	-0.0475864	0.0266958	0.0748782	1.12564
5153	Meta	DNAmPAI1AdjAge	CD8.naive	-0.0210018	0.0139371	0.131837	0.879962
327	FHS	DNAmPAI1AdjAge	CD8T	-0.0974201	0.0552062	0.0785601	1.1048
649	JHS	DNAmPAI1AdjAge	CD8T	-0.00832447	0.0393127	0.832369	0.0796843
639	InChianti	DNAmPAI1AdjAge	CD8T	-0.167651	0.0390607	2.04565e-05	4.68917
404	BLSA	DNAmPAI1AdjAge	CD8T	-0.0724146	0.0497445	0.146248	0.834912
291	LBC21	DNAmPAI1AdjAge	CD8T	-0.114755	0.0584349	0.0505117	1.29661
1441	LBC36	DNAmPAI1AdjAge	CD8T	0.0230642	0.0263545	0.381637	0.41835
1402	NAS	DNAmPAI1AdjAge	CD8T	-0.0462992	0.0266975	0.0830994	1.0804
5153	Meta	DNAmPAI1AdjAge	CD8T	-0.0467775	0.0139072	0.000769498	3.11379
327	FHS	DNAmPAI1AdjAge	CD8.ex	0.0677544	0.0553426	0.221736	0.654164
649	JHS	DNAmPAI1AdjAge	CD8.ex	0.0688663	0.0392207	0.0795845	1.09917
639	InChianti	DNAmPAI1AdjAge	CD8.ex	0.0695194	0.0395256	0.0790837	1.10191
404	BLSA	DNAmPAI1AdjAge	CD8.ex	0.102583	0.0496123	0.039309	1.40551
291	LBC21	DNAmPAI1AdjAge	CD8.ex	0.0859928	0.0586056	0.143378	0.843517
1441	LBC36	DNAmPAI1AdjAge	CD8.ex	0.0796616	0.0262777	0.00247665	2.60614
1402	NAS	DNAmPAI1AdjAge	CD8.ex	0.0392557	0.0267055	0.141801	0.84832
5153	Meta	DNAmPAI1AdjAge	CD8.ex	0.0674827	0.0139151	1.2372e-06	5.90756
327	FHS	DNAmPAI1AdjAge	NK	-0.201513	0.0543321	0.000244723	3.61133
649	JHS	DNAmPAI1AdjAge	NK	-0.101485	0.0391111	0.00967927	2.01416
639	InChianti	DNAmPAI1AdjAge	NK	-0.0550547	0.0395614	0.164521	0.783779
404	BLSA	DNAmPAI1AdjAge	NK	-0.0535503	0.0498039	0.28292	0.548336
291	LBC21	DNAmPAI1AdjAge	NK	0.0929056	0.0585691	0.113775	0.943954
1441	LBC36	DNAmPAI1AdjAge	NK	0.00242896	0.0263614	0.926599	0.0331081
1402	NAS	DNAmPAI1AdjAge	NK	-0.0910132	0.0266152	0.000645169	3.19033
5153	Meta	DNAmPAI1AdjAge	NK	-0.0558796	0.0138985	5.80662e-05	4.23608
327	FHS	DNAmPAI1AdjAge	PB	0.168786	0.0546742	0.002195	2.65857
649	JHS	DNAmPAI1AdjAge	PB	0.102419	0.0391073	0.00902726	2.04444
639	InChianti	DNAmPAI1AdjAge	PB	0.207291	0.0387608	1.24163e-07	6.90601
404	BLSA	DNAmPAI1AdjAge	PB	0.10265	0.049612	0.0391787	1.40695
291	LBC21	DNAmPAI1AdjAge	PB	0.0900844	0.0585844	0.125219	0.902329
1441	LBC36	DNAmPAI1AdjAge	PB	0.0882738	0.0262586	0.000794916	3.09968
1402	NAS	DNAmPAI1AdjAge	PB	0.0254009	0.0267175	0.341911	0.466087
5153	Meta	DNAmPAI1AdjAge	PB	0.0947491	0.0138637	8.23938e-12	11.0841
327	FHS	DNAmPAI1AdjAge	Mono	-0.0283984	0.0554476	0.608882	0.215467
649	JHS	DNAmPAI1AdjAge	Mono	0.01606	0.039309	0.683	0.165579
639	InChianti	DNAmPAI1AdjAge	Mono	0.0465179	0.0395786	0.240302	0.619243
404	BLSA	DNAmPAI1AdjAge	Mono	0.0325058	0.0498491	0.514719	0.28843
291	LBC21	DNAmPAI1AdjAge	Mono	0.127006	0.0583472	0.03031	1.51841
1441	LBC36	DNAmPAI1AdjAge	Mono	0.0864117	0.0262629	0.00102516	2.98921
1402	NAS	DNAmPAI1AdjAge	Mono	0.0548534	0.0266859	0.0400137	1.39779
5153	Meta	DNAmPAI1AdjAge	Mono	0.0549404	0.0139198	7.91578e-05	4.10151
327	FHS	DNAmPAI1AdjAge	Gran	0.237149	0.0538876	1.46446e-05	4.83432
649	JHS	DNAmPAI1AdjAge	Gran	0.116024	0.0390485	0.00307558	2.51207
639	InChianti	DNAmPAI1AdjAge	Gran	0.164263	0.0390832	3.01183e-05	4.52117
404	BLSA	DNAmPAI1AdjAge	Gran	0.154108	0.0492797	0.00189305	2.72284
291	LBC21	DNAmPAI1AdjAge	Gran	0.0289324	0.0587989	0.623052	0.205476
1441	LBC36	DNAmPAI1AdjAge	Gran	0.0900434	0.0262544	0.000621441	3.2066
1402	NAS	DNAmPAI1AdjAge	Gran	0.0567282	0.0266831	0.033678	1.47265
5153	Meta	DNAmPAI1AdjAge	Gran	0.10505	0.0138526	3.36718e-14	13.4727
327	FHS	DNAmTIMP1AdjAge	Bcell	-0.353609	0.0518863	4.58589e-11	10.3386
649	JHS	DNAmTIMP1AdjAge	Bcell	-0.20485	0.0384803	1.40553e-07	6.85216
639	InChianti	DNAmTIMP1AdjAge	Bcell	-0.314128	0.0376158	4.22763e-16	15.3739
404	BLSA	DNAmTIMP1AdjAge	Bcell	-0.254874	0.0482283	2.06894e-07	6.68425
291	LBC21	DNAmTIMP1AdjAge	Bcell	-0.216544	0.0574278	0.000197392	3.70467
1441	LBC36	DNAmTIMP1AdjAge	Bcell	-0.321335	0.0249634	5.72999e-36	35.2418
1402	NAS	DNAmTIMP1AdjAge	Bcell	-0.259811	0.0258083	4.60824e-23	22.3365
5153	Meta	DNAmTIMP1AdjAge	Bcell	-0.281196	0.0133718	3.55729e-98	97.4489
327	FHS	DNAmTIMP1AdjAge	CD4T	-0.236829	0.053892	1.50516e-05	4.82242
649	JHS	DNAmTIMP1AdjAge	CD4T	-0.219637	0.0383541	1.56993e-08	7.80412
639	InChianti	DNAmTIMP1AdjAge	CD4T	-0.292153	0.0378928	4.85618e-14	13.3137
404	BLSA	DNAmTIMP1AdjAge	CD4T	-0.218043	0.0486754	9.76278e-06	5.01043
291	LBC21	DNAmTIMP1AdjAge	CD4T	-0.21496	0.0574484	0.000220364	3.65686
1441	LBC36	DNAmTIMP1AdjAge	CD4T	-0.276801	0.0253315	9.30416e-27	26.0313
1402	NAS	DNAmTIMP1AdjAge	CD4T	-0.214342	0.026105	4.93946e-16	15.3063
5153	Meta	DNAmTIMP1AdjAge	CD4T	-0.244429	0.0135191	4.5637e-73	72.3407
327	FHS	DNAmTIMP1AdjAge	CD4.naive	-0.0608813	0.0553671	0.272323	0.564915
649	JHS	DNAmTIMP1AdjAge	CD4.naive	-0.125489	0.0390033	0.00135819	2.86704
639	InChianti	DNAmTIMP1AdjAge	CD4.naive	-0.160453	0.0391081	4.6113e-05	4.33618
404	BLSA	DNAmTIMP1AdjAge	CD4.naive	-0.0571808	0.0497939	0.251507	0.599451
291	LBC21	DNAmTIMP1AdjAge	CD4.naive	0.0908292	0.0585804	0.122114	0.913233
1441	LBC36	DNAmTIMP1AdjAge	CD4.naive	0.0937307	0.0262454	0.000366887	3.43547
1402	NAS	DNAmTIMP1AdjAge	CD4.naive	-0.118657	0.0265373	8.40154e-06	5.07564
5153	Meta	DNAmTIMP1AdjAge	CD4.naive	-0.0454032	0.0138624	0.00105555	2.97652
327	FHS	DNAmTIMP1AdjAge	CD8.naive	-0.0572345	0.0553791	0.302137	0.519797
649	JHS	DNAmTIMP1AdjAge	CD8.naive	-0.124414	0.0390086	0.00149457	2.82548
639	InChianti	DNAmTIMP1AdjAge	CD8.naive	-0.16532	0.0390763	2.67171e-05	4.57321
404	BLSA	DNAmTIMP1AdjAge	CD8.naive	-0.0515204	0.0498092	0.301592	0.52058
291	LBC21	DNAmTIMP1AdjAge	CD8.naive	0.165536	0.058012	0.00463686	2.33378
1441	LBC36	DNAmTIMP1AdjAge	CD8.naive	0.157582	0.0260321	1.8064e-09	8.74319
1402	NAS	DNAmTIMP1AdjAge	CD8.naive	-0.0359511	0.0267088	0.178509	0.74834
5153	Meta	DNAmTIMP1AdjAge	CD8.naive	0.000358228	0.0138465	0.97936	0.00905769
327	FHS	DNAmTIMP1AdjAge	CD8T	-0.116625	0.0550915	0.0350249	1.45562
649	JHS	DNAmTIMP1AdjAge	CD8T	-0.136246	0.0389475	0.000500493	3.3006
639	InChianti	DNAmTIMP1AdjAge	CD8T	-0.224924	0.0386062	9.00842e-09	8.04535
404	BLSA	DNAmTIMP1AdjAge	CD8T	-0.182224	0.0490404	0.000231236	3.63595
291	LBC21	DNAmTIMP1AdjAge	CD8T	0.0393438	0.058778	0.503798	0.297743
1441	LBC36	DNAmTIMP1AdjAge	CD8T	0.0279553	0.0263512	0.288925	0.539214
1402	NAS	DNAmTIMP1AdjAge	CD8T	-0.196332	0.026206	1.19736e-13	12.9218
5153	Meta	DNAmTIMP1AdjAge	CD8T	-0.111983	0.0137867	4.56298e-16	15.3408
327	FHS	DNAmTIMP1AdjAge	CD8.ex	0.139295	0.0549292	0.0116841	1.9324
649	JHS	DNAmTIMP1AdjAge	CD8.ex	0.129169	0.0389847	0.000973355	3.01173
639	InChianti	DNAmTIMP1AdjAge	CD8.ex	0.102774	0.0394116	0.00932897	2.03017
404	BLSA	DNAmTIMP1AdjAge	CD8.ex	0.13863	0.0493939	0.00525006	2.27984
291	LBC21	DNAmTIMP1AdjAge	CD8.ex	-0.0378704	0.0587813	0.519919	0.284065
1441	LBC36	DNAmTIMP1AdjAge	CD8.ex	0.0578133	0.0263174	0.0281956	1.54982
1402	NAS	DNAmTIMP1AdjAge	CD8.ex	0.119524	0.0265345	7.20761e-06	5.14221
5153	Meta	DNAmTIMP1AdjAge	CD8.ex	0.0955264	0.013872	5.72772e-12	11.242
327	FHS	DNAmTIMP1AdjAge	NK	-0.303	0.0528624	2.26847e-08	7.64427
649	JHS	DNAmTIMP1AdjAge	NK	-0.122738	0.0390168	0.00173244	2.76134
639	InChianti	DNAmTIMP1AdjAge	NK	-0.196802	0.0388466	5.32457e-07	6.27372
404	BLSA	DNAmTIMP1AdjAge	NK	-0.0614273	0.0497813	0.217945	0.661653
291	LBC21	DNAmTIMP1AdjAge	NK	-0.25144	0.0569337	1.42018e-05	4.84766
1441	LBC36	DNAmTIMP1AdjAge	NK	-0.135272	0.0261192	2.5465e-07	6.59406
1402	NAS	DNAmTIMP1AdjAge	NK	-0.201249	0.0261793	2.8128e-14	13.5509
5153	Meta	DNAmTIMP1AdjAge	NK	-0.171941	0.0137175	4.83978e-36	35.3152
327	FHS	DNAmTIMP1AdjAge	PB	0.322298	0.05251	2.43464e-09	8.61357
649	JHS	DNAmTIMP1AdjAge	PB	0.189383	0.0386026	1.1777e-06	5.92897
639	InChianti	DNAmTIMP1AdjAge	PB	0.388065	0.0365164	2.13923e-24	23.6697
404	BLSA	DNAmTIMP1AdjAge	PB	0.284818	0.0478097	5.60326e-09	8.25156
291	LBC21	DNAmTIMP1AdjAge	PB	0.35678	0.0549523	3.66914e-10	9.43544
1441	LBC36	DNAmTIMP1AdjAge	PB	0.436941	0.0237119	3.03405e-68	67.518
1402	NAS	DNAmTIMP1AdjAge	PB	0.377463	0.024749	1.05095e-48	47.9784
5153	Meta	DNAmTIMP1AdjAge	PB	0.364071	0.0129494	6.45015e-174	173.19
327	FHS	DNAmTIMP1AdjAge	Mono	-0.0328063	0.0554402	0.554434	0.25615
649	JHS	DNAmTIMP1AdjAge	Mono	0.0670255	0.0392256	0.0879832	1.0556
639	InChianti	DNAmTIMP1AdjAge	Mono	0.0239345	0.0396101	0.545891	0.262894
404	BLSA	DNAmTIMP1AdjAge	Mono	0.0814299	0.0497098	0.102182	0.990624
291	LBC21	DNAmTIMP1AdjAge	Mono	-0.0622457	0.0587095	0.289924	0.537716
1441	LBC36	DNAmTIMP1AdjAge	Mono	-0.0536716	0.0263235	0.0416399	1.38049
1402	NAS	DNAmTIMP1AdjAge	Mono	0.0914015	0.0266143	0.000611425	3.21366
5153	Meta	DNAmTIMP1AdjAge	Mono	0.022203	0.0139179	0.110649	0.956051
327	FHS	DNAmTIMP1AdjAge	Gran	0.420325	0.050332	1.97974e-15	14.7034
649	JHS	DNAmTIMP1AdjAge	Gran	0.271288	0.0378397	2.0635e-12	11.6854
639	InChianti	DNAmTIMP1AdjAge	Gran	0.42966	0.0357778	4.30364e-30	29.3662
404	BLSA	DNAmTIMP1AdjAge	Gran	0.307009	0.0474668	2.88992e-10	9.53911
291	LBC21	DNAmTIMP1AdjAge	Gran	0.382816	0.0543426	1.36521e-11	10.8648
1441	LBC36	DNAmTIMP1AdjAge	Gran	0.457819	0.0234365	1.4546e-75	74.8373
1402	NAS	DNAmTIMP1AdjAge	Gran	0.455182	0.0237969	1.2235e-72	71.9124
5153	Meta	DNAmTIMP1AdjAge	Gran	0.415524	0.0126559	2.03367e-236	235.692
327	FHS	DNAmPACKYRSAdjAge	Bcell	-0.105249	0.0551619	0.057273	1.24205
649	JHS	DNAmPACKYRSAdjAge	Bcell	-0.032461	0.0392933	0.40904	0.388234
639	InChianti	DNAmPACKYRSAdjAge	Bcell	-0.0509006	0.0395701	0.198791	0.701603
404	BLSA	DNAmPACKYRSAdjAge	Bcell	-0.112608	0.0495582	0.0235999	1.62709
291	LBC21	DNAmPACKYRSAdjAge	Bcell	0.0390634	0.0587786	0.506846	0.295124
1441	LBC36	DNAmPACKYRSAdjAge	Bcell	-0.0151061	0.0263585	0.566665	0.246674
1402	NAS	DNAmPACKYRSAdjAge	Bcell	0.0573604	0.0266821	0.0317444	1.49833
5153	Meta	DNAmPACKYRSAdjAge	Bcell	-0.0123823	0.0139272	0.373962	0.427173
327	FHS	DNAmPACKYRSAdjAge	CD4T	-0.0864517	0.0552623	0.1187	0.925549
649	JHS	DNAmPACKYRSAdjAge	CD4T	-0.0277822	0.0392989	0.479854	0.31889
639	InChianti	DNAmPACKYRSAdjAge	CD4T	0.0280325	0.0396059	0.479337	0.319359
404	BLSA	DNAmPACKYRSAdjAge	CD4T	0.0138059	0.0498707	0.78205	0.106766
291	LBC21	DNAmPACKYRSAdjAge	CD4T	0.0795512	0.0586371	0.175945	0.754623
1441	LBC36	DNAmPACKYRSAdjAge	CD4T	0.0307351	0.026349	0.243621	0.613285
1402	NAS	DNAmPACKYRSAdjAge	CD4T	-0.00853074	0.0267252	0.74962	0.125159
5153	Meta	DNAmPACKYRSAdjAge	CD4T	0.00633267	0.0139403	0.649634	0.187331
327	FHS	DNAmPACKYRSAdjAge	CD4.naive	0.121346	0.0550601	0.0282336	1.54923
649	JHS	DNAmPACKYRSAdjAge	CD4.naive	0.0875317	0.0391632	0.0257545	1.58915
639	InChianti	DNAmPACKYRSAdjAge	CD4.naive	0.108834	0.0393861	0.00588808	2.23003
404	BLSA	DNAmPACKYRSAdjAge	CD4.naive	0.109524	0.0495754	0.027721	1.55719
291	LBC21	DNAmPACKYRSAdjAge	CD4.naive	0.0429795	0.0587692	0.465172	0.332386
1441	LBC36	DNAmPACKYRSAdjAge	CD4.naive	0.100682	0.0262275	0.000128996	3.88942
1402	NAS	DNAmPACKYRSAdjAge	CD4.naive	0.160126	0.0263813	1.64719e-09	8.78326
5153	Meta	DNAmPACKYRSAdjAge	CD4.naive	0.115221	0.0138496	8.8341e-17	16.0538
327	FHS	DNAmPACKYRSAdjAge	CD8.naive	-0.0741172	0.0553175	0.18123	0.741771
649	JHS	DNAmPACKYRSAdjAge	CD8.naive	-0.176282	0.0386984	6.25358e-06	5.20387
639	InChianti	DNAmPACKYRSAdjAge	CD8.naive	-0.221481	0.0386374	1.53016e-08	7.81526
404	BLSA	DNAmPACKYRSAdjAge	CD8.naive	-0.096385	0.0496433	0.0528896	1.27663
291	LBC21	DNAmPACKYRSAdjAge	CD8.naive	-0.156042	0.058103	0.00765823	2.11587
1441	LBC36	DNAmPACKYRSAdjAge	CD8.naive	-0.187051	0.0258962	8.20765e-13	12.0858
1402	NAS	DNAmPACKYRSAdjAge	CD8.naive	-0.240587	0.0259411	6.55084e-20	19.1837
5153	Meta	DNAmPACKYRSAdjAge	CD8.naive	-0.189399	0.0136799	1.36364e-43	42.8653
327	FHS	DNAmPACKYRSAdjAge	CD8T	0.0273604	0.0554493	0.622041	0.206181
649	JHS	DNAmPACKYRSAdjAge	CD8T	0.0255205	0.0393013	0.516339	0.287065
639	InChianti	DNAmPACKYRSAdjAge	CD8T	-0.0793864	0.0394964	0.044856	1.34818
404	BLSA	DNAmPACKYRSAdjAge	CD8T	0.0462042	0.0498222	0.354285	0.450648
291	LBC21	DNAmPACKYRSAdjAge	CD8T	0.204196	0.0575841	0.000456033	3.341
1441	LBC36	DNAmPACKYRSAdjAge	CD8T	0.0371331	0.0263433	0.158878	0.798935
1402	NAS	DNAmPACKYRSAdjAge	CD8T	0.105102	0.0265781	8.05479e-05	4.09395
5153	Meta	DNAmPACKYRSAdjAge	CD8T	0.0496679	0.0139013	0.000353047	3.45217
327	FHS	DNAmPACKYRSAdjAge	CD8.ex	0.181266	0.0545511	0.000992541	3.00325
649	JHS	DNAmPACKYRSAdjAge	CD8.ex	0.0200328	0.0393062	0.610462	0.214341
639	InChianti	DNAmPACKYRSAdjAge	CD8.ex	0.0798374	0.039495	0.04365	1.36002
404	BLSA	DNAmPACKYRSAdjAge	CD8.ex	0.0765508	0.0497291	0.124504	0.904815
291	LBC21	DNAmPACKYRSAdjAge	CD8.ex	0.0649569	0.0586993	0.269385	0.569626
1441	LBC36	DNAmPACKYRSAdjAge	CD8.ex	0.189899	0.0258818	3.63115e-13	12.44
1402	NAS	DNAmPACKYRSAdjAge	CD8.ex	0.113114	0.0265546	2.18374e-05	4.6608
5153	Meta	DNAmPACKYRSAdjAge	CD8.ex	0.118312	0.0138277	1.16677e-17	16.933
327	FHS	DNAmPACKYRSAdjAge	NK	-0.253513	0.0536579	3.43668e-06	5.46386
649	JHS	DNAmPACKYRSAdjAge	NK	-0.244716	0.0381187	2.64004e-10	9.57839
639	InChianti	DNAmPACKYRSAdjAge	NK	-0.123904	0.0393161	0.00170059	2.7694
404	BLSA	DNAmPACKYRSAdjAge	NK	-0.0509108	0.0498108	0.307356	0.512358
291	LBC21	DNAmPACKYRSAdjAge	NK	-0.0206562	0.058811	0.725672	0.13926
1441	LBC36	DNAmPACKYRSAdjAge	NK	-0.103616	0.0262196	8.13071e-05	4.08987
1402	NAS	DNAmPACKYRSAdjAge	NK	-0.0549155	0.0266858	0.0397887	1.40024
5153	Meta	DNAmPACKYRSAdjAge	NK	-0.112918	0.0138231	3.11507e-16	15.5065
327	FHS	DNAmPACKYRSAdjAge	PB	0.0778547	0.0553017	0.160141	0.795499
649	JHS	DNAmPACKYRSAdjAge	PB	0.0442874	0.0392755	0.259903	0.585188
639	InChianti	DNAmPACKYRSAdjAge	PB	0.124455	0.0393134	0.00162085	2.79026
404	BLSA	DNAmPACKYRSAdjAge	PB	-0.0157102	0.0498693	0.752904	0.12326
291	LBC21	DNAmPACKYRSAdjAge	PB	-0.000543092	0.0588235	0.99264	0.00320825
1441	LBC36	DNAmPACKYRSAdjAge	PB	-0.000667741	0.0263615	0.979795	0.00886473
1402	NAS	DNAmPACKYRSAdjAge	PB	-0.131173	0.0264952	8.28656e-07	6.08163
5153	Meta	DNAmPACKYRSAdjAge	PB	-0.0115128	0.0138984	0.407469	0.389905
327	FHS	DNAmPACKYRSAdjAge	Mono	-0.124894	0.0550357	0.0239035	1.62154
649	JHS	DNAmPACKYRSAdjAge	Mono	-0.00769771	0.0393129	0.844823	0.0732341
639	InChianti	DNAmPACKYRSAdjAge	Mono	0.0833615	0.0394835	0.0351355	1.45425
404	BLSA	DNAmPACKYRSAdjAge	Mono	-0.0202763	0.0498652	0.684502	0.164625
291	LBC21	DNAmPACKYRSAdjAge	Mono	0.0537403	0.0587385	0.361003	0.442489
1441	LBC36	DNAmPACKYRSAdjAge	Mono	-0.0325423	0.0263475	0.216988	0.663565
1402	NAS	DNAmPACKYRSAdjAge	Mono	-0.0281526	0.0267155	0.292161	0.534378
5153	Meta	DNAmPACKYRSAdjAge	Mono	-0.0139051	0.0139316	0.318232	0.497256
327	FHS	DNAmPACKYRSAdjAge	Gran	0.193525	0.0544214	0.000432419	3.3641
649	JHS	DNAmPACKYRSAdjAge	Gran	0.090597	0.0391524	0.0209824	1.67814
639	InChianti	DNAmPACKYRSAdjAge	Gran	0.0627433	0.0395434	0.113078	0.946623
404	BLSA	DNAmPACKYRSAdjAge	Gran	0.0207274	0.0498648	0.677872	0.168852
291	LBC21	DNAmPACKYRSAdjAge	Gran	-0.0703778	0.0586777	0.231356	0.635718
1441	LBC36	DNAmPACKYRSAdjAge	Gran	0.0186035	0.0263569	0.480409	0.318389
1402	NAS	DNAmPACKYRSAdjAge	Gran	-0.0958535	0.0266031	0.000325455	3.48751
5153	Meta	DNAmPACKYRSAdjAge	Gran	0.00846547	0.0139015	0.54255	0.26556
