# Supplementary material for: DNA methylation GrimAge version 2
Source: Aging (Albany NY). 2022 Dec 14;14(23):9484–549. doi: 10.18632/aging.204434 (PMC9792204; doi:10.18632/aging.204434)
Supplement: Supplementary Table 4.3 [file aging-14-204434-s019.xlsx]

## Sheet: Table S4.3
Supplementary Table 4.3. Association with blood cell composition in females.
n	data	var	cell	Correlation	SE	P	log10P
384	FHS	AgeAccelGrim2	Bcell	-0.235417	0.0497264	3.10298e-06	5.50822
1097	JHS	AgeAccelGrim2	Bcell	-0.251737	0.0292467	2.56237e-17	16.5914
791	InChianti	AgeAccelGrim2	Bcell	-0.213949	0.0347766	1.21504e-09	8.91541
384	BLSA	AgeAccelGrim2	Bcell	-0.141139	0.0506523	0.00559522	2.25218
401	LBC21	AgeAccelGrim2	Bcell	-0.0928108	0.0498465	0.0633477	1.19827
1355	LBC36	AgeAccelGrim2	Bcell	-0.198455	0.0266456	1.68241e-13	12.7741
998	WHI BA23 White	AgeAccelGrim2	Bcell	-0.257078	0.0306213	1.58062e-16	15.8012
676	WHI BA23 AfricanA	AgeAccelGrim2	Bcell	-0.219316	0.0375808	8.3138e-09	8.0802
433	WHI BA23 Hispanic	AgeAccelGrim2	Bcell	-0.310674	0.0457848	3.83556e-11	10.4162
6519	Meta	AgeAccelGrim2	Bcell	-0.221222	0.0120801	6.52667e-75	74.1853
384	FHS	AgeAccelGrim2	CD4T	-0.250929	0.0495275	6.32335e-07	6.19905
1097	JHS	AgeAccelGrim2	CD4T	-0.279439	0.029016	3.97412e-21	20.4008
791	InChianti	AgeAccelGrim2	CD4T	-0.30343	0.0339225	2.61631e-18	17.5823
384	BLSA	AgeAccelGrim2	CD4T	-0.221728	0.0498909	1.15715e-05	4.93661
401	LBC21	AgeAccelGrim2	CD4T	-0.232096	0.0486955	2.63348e-06	5.57947
1355	LBC36	AgeAccelGrim2	CD4T	-0.26721	0.0261978	1.38352e-23	22.859
998	WHI BA23 White	AgeAccelGrim2	CD4T	-0.253993	0.0306471	3.70395e-16	15.4313
676	WHI BA23 AfricanA	AgeAccelGrim2	CD4T	-0.299347	0.0367523	1.84017e-15	14.7351
433	WHI BA23 Hispanic	AgeAccelGrim2	CD4T	-0.382475	0.0445059	1.56263e-16	15.8061
6519	Meta	AgeAccelGrim2	CD4T	-0.277727	0.0119058	2.35411e-120	119.628
384	FHS	AgeAccelGrim2	CD4.naive	-0.0515695	0.0510964	0.313489	0.503778
1097	JHS	AgeAccelGrim2	CD4.naive	-0.158409	0.0298383	1.3346e-07	6.87465
791	InChianti	AgeAccelGrim2	CD4.naive	-0.0920779	0.0354497	0.00956761	2.0192
384	BLSA	AgeAccelGrim2	CD4.naive	-0.166761	0.050448	0.00103741	2.98405
401	LBC21	AgeAccelGrim2	CD4.naive	-0.0418643	0.0500187	0.403109	0.394577
1355	LBC36	AgeAccelGrim2	CD4.naive	-0.0741398	0.0271115	0.00632675	2.19882
998	WHI BA23 White	AgeAccelGrim2	CD4.naive	-0.108058	0.0315007	0.000627594	3.20232
676	WHI BA23 AfricanA	AgeAccelGrim2	CD4.naive	-0.23131	0.0374739	1.16014e-09	8.93549
433	WHI BA23 Hispanic	AgeAccelGrim2	CD4.naive	-0.232185	0.0468519	1.03746e-06	5.98403
6519	Meta	AgeAccelGrim2	CD4.naive	-0.125701	0.0122808	1.3744e-24	23.8619
384	FHS	AgeAccelGrim2	CD8.naive	-0.165575	0.0504582	0.00112784	2.94775
1097	JHS	AgeAccelGrim2	CD8.naive	-0.219668	0.0294818	1.87548e-13	12.7269
791	InChianti	AgeAccelGrim2	CD8.naive	-0.139878	0.0352509	7.90602e-05	4.10204
384	BLSA	AgeAccelGrim2	CD8.naive	-0.228021	0.0498166	6.38248e-06	5.19501
401	LBC21	AgeAccelGrim2	CD8.naive	-0.162582	0.0493965	0.00108577	2.96426
1355	LBC36	AgeAccelGrim2	CD8.naive	-0.170361	0.0267889	2.76413e-10	9.55844
998	WHI BA23 White	AgeAccelGrim2	CD8.naive	-0.246153	0.0307113	3.06584e-15	14.5135
676	WHI BA23 AfricanA	AgeAccelGrim2	CD8.naive	-0.399122	0.0353176	3.07149e-27	26.5127
433	WHI BA23 Hispanic	AgeAccelGrim2	CD8.naive	-0.288195	0.0461246	9.98084e-10	9.00083
6519	Meta	AgeAccelGrim2	CD8.naive	-0.22402	0.0120506	3.87521e-77	76.4117
384	FHS	AgeAccelGrim2	CD8T	-0.152099	0.0505692	0.00280623	2.55188
1097	JHS	AgeAccelGrim2	CD8T	-0.18184	0.0297161	1.30723e-09	8.88365
791	InChianti	AgeAccelGrim2	CD8T	-0.0749223	0.0355009	0.0351351	1.45426
384	BLSA	AgeAccelGrim2	CD8T	-0.0808844	0.0509968	0.113551	0.944807
401	LBC21	AgeAccelGrim2	CD8T	0.0493552	0.0500016	0.324206	0.489179
1355	LBC36	AgeAccelGrim2	CD8T	-0.0737347	0.0271124	0.00661979	2.17916
998	WHI BA23 White	AgeAccelGrim2	CD8T	-0.0479079	0.0316498	0.130423	0.884646
676	WHI BA23 AfricanA	AgeAccelGrim2	CD8T	-0.1022	0.0383169	0.0078314	2.10616
433	WHI BA23 Hispanic	AgeAccelGrim2	CD8T	-0.0588209	0.0480849	0.221895	0.653852
6519	Meta	AgeAccelGrim2	CD8T	-0.0881377	0.0123337	8.92912e-13	12.0492
384	FHS	AgeAccelGrim2	CD8.ex	0.246936	0.04958	9.62102e-07	6.01678
1097	JHS	AgeAccelGrim2	CD8.ex	0.171359	0.0297729	1.12056e-08	7.95057
791	InChianti	AgeAccelGrim2	CD8.ex	0.0977935	0.0354303	0.00591121	2.22832
384	BLSA	AgeAccelGrim2	CD8.ex	0.136277	0.0506871	0.00748961	2.12554
401	LBC21	AgeAccelGrim2	CD8.ex	0.13956	0.0495727	0.0051154	2.29112
1355	LBC36	AgeAccelGrim2	CD8.ex	0.21963	0.0265226	2.90437e-16	15.5369
998	WHI BA23 White	AgeAccelGrim2	CD8.ex	0.176097	0.031191	2.14417e-08	7.66874
676	WHI BA23 AfricanA	AgeAccelGrim2	CD8.ex	0.292882	0.0368295	7.73132e-15	14.1117
433	WHI BA23 Hispanic	AgeAccelGrim2	CD8.ex	0.221216	0.0469749	3.35813e-06	5.4739
6519	Meta	AgeAccelGrim2	CD8.ex	0.190749	0.0121558	1.71541e-55	54.7656
384	FHS	AgeAccelGrim2	NK	-0.246217	0.0495893	1.03685e-06	5.98428
1097	JHS	AgeAccelGrim2	NK	-0.119898	0.0300019	6.86299e-05	4.16349
791	InChianti	AgeAccelGrim2	NK	-0.266379	0.0343146	2.57564e-14	13.5891
384	BLSA	AgeAccelGrim2	NK	-0.139948	0.0506609	0.0060143	2.22081
401	LBC21	AgeAccelGrim2	NK	-0.193932	0.0491122	9.28588e-05	4.03218
1355	LBC36	AgeAccelGrim2	NK	-0.146905	0.0268914	5.56853e-08	7.25426
998	WHI BA23 White	AgeAccelGrim2	NK	-0.211091	0.0309722	1.62473e-11	10.7892
676	WHI BA23 AfricanA	AgeAccelGrim2	NK	-0.103744	0.0383107	0.00694142	2.15855
433	WHI BA23 Hispanic	AgeAccelGrim2	NK	-0.142306	0.0476781	0.00299985	2.5229
6519	Meta	AgeAccelGrim2	NK	-0.171335	0.0122009	8.5226e-45	44.0694
384	FHS	AgeAccelGrim2	PB	0.348457	0.0479577	2.1021e-12	11.6773
1097	JHS	AgeAccelGrim2	PB	0.267772	0.0291163	1.81277e-19	18.7417
791	InChianti	AgeAccelGrim2	PB	0.257731	0.0343982	1.81364e-13	12.7414
384	BLSA	AgeAccelGrim2	PB	0.179446	0.0503339	0.000409834	3.38739
401	LBC21	AgeAccelGrim2	PB	0.179669	0.049248	0.000299067	3.52423
1355	LBC36	AgeAccelGrim2	PB	0.256394	0.0262776	8.81016e-22	21.055
998	WHI BA23 White	AgeAccelGrim2	PB	0.295198	0.0302741	1.61787e-21	20.7911
676	WHI BA23 AfricanA	AgeAccelGrim2	PB	0.266744	0.0371229	1.78086e-12	11.7494
433	WHI BA23 Hispanic	AgeAccelGrim2	PB	0.290106	0.0460968	7.64811e-10	9.11645
6519	Meta	AgeAccelGrim2	PB	0.264718	0.0119505	1.01699e-108	107.993
384	FHS	AgeAccelGrim2	Mono	0.0275323	0.0511451	0.590672	0.228654
1097	JHS	AgeAccelGrim2	Mono	0.137163	0.0299343	5.13084e-06	5.28981
791	InChianti	AgeAccelGrim2	Mono	0.0504454	0.0355556	0.156359	0.805876
384	BLSA	AgeAccelGrim2	Mono	0.175503	0.0503703	0.000550723	3.25907
401	LBC21	AgeAccelGrim2	Mono	-0.00469537	0.0500621	0.925322	0.033707
1355	LBC36	AgeAccelGrim2	Mono	0.0180447	0.0271819	0.5069	0.295078
998	WHI BA23 White	AgeAccelGrim2	Mono	-0.017471	0.0316814	0.581443	0.235493
676	WHI BA23 AfricanA	AgeAccelGrim2	Mono	0.10941	0.0382873	0.00440031	2.35652
433	WHI BA23 Hispanic	AgeAccelGrim2	Mono	0.0767546	0.0480262	0.110735	0.955714
6519	Meta	AgeAccelGrim2	Mono	0.0589089	0.012358	1.87122e-06	5.72787
384	FHS	AgeAccelGrim2	Gran	0.392891	0.0470501	1.26602e-15	14.8976
1097	JHS	AgeAccelGrim2	Gran	0.343806	0.0283777	8.55914e-32	31.0676
791	InChianti	AgeAccelGrim2	Gran	0.361018	0.0332	9.26273e-26	25.0333
384	BLSA	AgeAccelGrim2	Gran	0.234303	0.0497402	3.46447e-06	5.46036
401	LBC21	AgeAccelGrim2	Gran	0.234411	0.0486677	2.0777e-06	5.68242
1355	LBC36	AgeAccelGrim2	Gran	0.315023	0.0258021	1.3436e-32	31.8717
998	WHI BA23 White	AgeAccelGrim2	Gran	0.339074	0.0298091	2.8438e-28	27.5461
676	WHI BA23 AfricanA	AgeAccelGrim2	Gran	0.301312	0.0367284	1.18099e-15	14.9278
433	WHI BA23 Hispanic	AgeAccelGrim2	Gran	0.369578	0.044758	1.84334e-15	14.7344
6519	Meta	AgeAccelGrim2	Gran	0.327377	0.0117081	4.75877e-172	171.323
384	FHS	AgeAccelGrim	Bcell	-0.236146	0.0497174	2.88639e-06	5.53964
1097	JHS	AgeAccelGrim	Bcell	-0.197605	0.029624	4.03938e-11	10.3937
791	InChianti	AgeAccelGrim	Bcell	-0.166498	0.035104	2.49906e-06	5.60222
384	BLSA	AgeAccelGrim	Bcell	-0.0765787	0.0510142	0.13415	0.872411
401	LBC21	AgeAccelGrim	Bcell	-0.0103609	0.0500599	0.836139	0.0777216
1355	LBC36	AgeAccelGrim	Bcell	-0.178863	0.026748	3.32322e-11	10.4784
998	WHI BA23 White	AgeAccelGrim	Bcell	-0.175321	0.0311954	2.47694e-08	7.60608
676	WHI BA23 AfricanA	AgeAccelGrim	Bcell	-0.137127	0.0381547	0.0003494	3.45668
433	WHI BA23 Hispanic	AgeAccelGrim	Bcell	-0.228848	0.04689	1.49226e-06	5.82616
6519	Meta	AgeAccelGrim	Bcell	-0.166692	0.0122116	2.01072e-42	41.6966
384	FHS	AgeAccelGrim	CD4T	-0.226721	0.0498321	7.22749e-06	5.14101
1097	JHS	AgeAccelGrim	CD4T	-0.214814	0.0295144	6.43862e-13	12.1912
791	InChianti	AgeAccelGrim	CD4T	-0.236824	0.0345882	1.51694e-11	10.819
384	BLSA	AgeAccelGrim	CD4T	-0.134235	0.0507014	0.00844328	2.07349
401	LBC21	AgeAccelGrim	CD4T	-0.19956	0.0490556	5.71536e-05	4.24296
1355	LBC36	AgeAccelGrim	CD4T	-0.219708	0.0265221	2.8335e-16	15.5477
998	WHI BA23 White	AgeAccelGrim	CD4T	-0.177684	0.031182	1.59311e-08	7.79775
676	WHI BA23 AfricanA	AgeAccelGrim	CD4T	-0.203403	0.0377133	9.57854e-08	7.0187
433	WHI BA23 Hispanic	AgeAccelGrim	CD4T	-0.260169	0.0465095	3.9519e-08	7.40319
6519	Meta	AgeAccelGrim	CD4T	-0.209998	0.0121209	3.03148e-67	66.5183
384	FHS	AgeAccelGrim	CD4.naive	-0.00531268	0.0511637	0.917353	0.0374634
1097	JHS	AgeAccelGrim	CD4.naive	-0.116308	0.0300148	0.00011295	3.94711
791	InChianti	AgeAccelGrim	CD4.naive	-0.0423212	0.035569	0.23447	0.629913
384	BLSA	AgeAccelGrim	CD4.naive	-0.112034	0.0508423	0.0281511	1.5505
401	LBC21	AgeAccelGrim	CD4.naive	-0.0594781	0.049974	0.234683	0.629518
1355	LBC36	AgeAccelGrim	CD4.naive	-0.0358873	0.0271689	0.186758	0.72872
998	WHI BA23 White	AgeAccelGrim	CD4.naive	-0.0332253	0.0316687	0.294362	0.531118
676	WHI BA23 AfricanA	AgeAccelGrim	CD4.naive	-0.160841	0.0380171	2.65142e-05	4.57652
433	WHI BA23 Hispanic	AgeAccelGrim	CD4.naive	-0.133114	0.0477396	0.00553243	2.25708
6519	Meta	AgeAccelGrim	CD4.naive	-0.073743	0.0123539	2.38432e-09	8.62264
384	FHS	AgeAccelGrim	CD8.naive	-0.141323	0.0506509	0.00553261	2.25707
1097	JHS	AgeAccelGrim	CD8.naive	-0.189464	0.0296725	2.52468e-10	9.59779
791	InChianti	AgeAccelGrim	CD8.naive	-0.0490237	0.0355581	0.16838	0.773708
384	BLSA	AgeAccelGrim	CD8.naive	-0.20699	0.0500564	4.36452e-05	4.36006
401	LBC21	AgeAccelGrim	CD8.naive	-0.230741	0.0487117	3.02199e-06	5.51971
1355	LBC36	AgeAccelGrim	CD8.naive	-0.197777	0.0266494	2.0394e-13	12.6905
998	WHI BA23 White	AgeAccelGrim	CD8.naive	-0.197496	0.0310621	3.10592e-10	9.50781
676	WHI BA23 AfricanA	AgeAccelGrim	CD8.naive	-0.340825	0.0362123	7.54807e-20	19.1222
433	WHI BA23 Hispanic	AgeAccelGrim	CD8.naive	-0.227175	0.0469089	1.78704e-06	5.74787
6519	Meta	AgeAccelGrim	CD8.naive	-0.196399	0.0121281	5.58752e-59	58.2528
384	FHS	AgeAccelGrim	CD8T	-0.105105	0.0508811	0.0395312	1.40306
1097	JHS	AgeAccelGrim	CD8T	-0.129473	0.0299655	1.69635e-05	4.77048
791	InChianti	AgeAccelGrim	CD8T	-0.11822	0.0353513	0.000864306	3.06333
384	BLSA	AgeAccelGrim	CD8T	-0.0468771	0.0511082	0.35961	0.444168
401	LBC21	AgeAccelGrim	CD8T	0.0980772	0.0498213	0.0496929	1.30371
1355	LBC36	AgeAccelGrim	CD8T	-0.0759129	0.0271079	0.00517658	2.28596
998	WHI BA23 White	AgeAccelGrim	CD8T	0.00603225	0.0316856	0.849052	0.0710659
676	WHI BA23 AfricanA	AgeAccelGrim	CD8T	-0.02561	0.0385059	0.506219	0.295662
433	WHI BA23 Hispanic	AgeAccelGrim	CD8T	0.00202337	0.0481682	0.966513	0.0147922
6519	Meta	AgeAccelGrim	CD8T	-0.0567362	0.0123578	4.40845e-06	5.35571
384	FHS	AgeAccelGrim	CD8.ex	0.266436	0.049315	1.15715e-07	6.93661
1097	JHS	AgeAccelGrim	CD8.ex	0.161602	0.0298227	7.37753e-08	7.13209
791	InChianti	AgeAccelGrim	CD8.ex	0.0681921	0.0355181	0.0552273	1.25785
384	BLSA	AgeAccelGrim	CD8.ex	0.12363	0.0507719	0.0153482	1.81394
401	LBC21	AgeAccelGrim	CD8.ex	0.168451	0.0493472	0.000706768	3.15072
1355	LBC36	AgeAccelGrim	CD8.ex	0.223387	0.0264994	8.74182e-17	16.0584
998	WHI BA23 White	AgeAccelGrim	CD8.ex	0.152294	0.0313166	1.3427e-06	5.87202
676	WHI BA23 AfricanA	AgeAccelGrim	CD8.ex	0.254485	0.0372504	1.87785e-11	10.7263
433	WHI BA23 Hispanic	AgeAccelGrim	CD8.ex	0.190366	0.0472875	6.71073e-05	4.17323
6519	Meta	AgeAccelGrim	CD8.ex	0.178734	0.0121821	9.76264e-49	48.0104
384	FHS	AgeAccelGrim	NK	-0.228355	0.0498126	6.18128e-06	5.20892
1097	JHS	AgeAccelGrim	NK	-0.101855	0.0300627	0.000728875	3.13735
791	InChianti	AgeAccelGrim	NK	-0.215807	0.034762	8.66065e-10	9.06245
384	BLSA	AgeAccelGrim	NK	-0.12477	0.0507646	0.0144223	1.84097
401	LBC21	AgeAccelGrim	NK	-0.145611	0.049529	0.00347398	2.45917
1355	LBC36	AgeAccelGrim	NK	-0.109173	0.0270239	5.64827e-05	4.24808
998	WHI BA23 White	AgeAccelGrim	NK	-0.164483	0.0312546	1.73841e-07	6.75985
676	WHI BA23 AfricanA	AgeAccelGrim	NK	-0.0589067	0.0384517	0.126	0.89963
433	WHI BA23 Hispanic	AgeAccelGrim	NK	-0.0865803	0.0479874	0.0718935	1.14331
6519	Meta	AgeAccelGrim	NK	-0.133569	0.0122754	1.41993e-27	26.8477
384	FHS	AgeAccelGrim	PB	0.326519	0.0483602	5.44653e-11	10.2639
1097	JHS	AgeAccelGrim	PB	0.207016	0.0295653	4.39341e-12	11.3572
791	InChianti	AgeAccelGrim	PB	0.21113	0.0347984	2.01875e-09	8.69492
384	BLSA	AgeAccelGrim	PB	0.107344	0.0508688	0.0354903	1.44989
401	LBC21	AgeAccelGrim	PB	0.126192	0.0496624	0.0114314	1.9419
1355	LBC36	AgeAccelGrim	PB	0.217878	0.0265332	5.04654e-16	15.297
998	WHI BA23 White	AgeAccelGrim	PB	0.223937	0.0308815	8.2684e-13	12.0826
676	WHI BA23 AfricanA	AgeAccelGrim	PB	0.174633	0.0379267	4.94288e-06	5.30602
433	WHI BA23 Hispanic	AgeAccelGrim	PB	0.209959	0.0470946	1.05522e-05	4.97666
6519	Meta	AgeAccelGrim	PB	0.206309	0.0121228	6.01487e-65	64.2208
384	FHS	AgeAccelGrim	Mono	0.0136595	0.0511597	0.789615	0.102584
1097	JHS	AgeAccelGrim	Mono	0.0969581	0.0300775	0.00130324	2.88498
791	InChianti	AgeAccelGrim	Mono	0.0187315	0.0355947	0.598866	0.222671
384	BLSA	AgeAccelGrim	Mono	0.13247	0.0507135	0.00935291	2.02905
401	LBC21	AgeAccelGrim	Mono	0.00452744	0.0500621	0.927986	0.0324587
1355	LBC36	AgeAccelGrim	Mono	0.0401063	0.0271645	0.140062	0.853678
998	WHI BA23 White	AgeAccelGrim	Mono	-0.0559216	0.0316366	0.0774304	1.11109
676	WHI BA23 AfricanA	AgeAccelGrim	Mono	0.0526507	0.0384651	0.171521	0.765684
433	WHI BA23 Hispanic	AgeAccelGrim	Mono	0.0232519	0.0481553	0.629446	0.201041
6519	Meta	AgeAccelGrim	Mono	0.034414	0.0123788	0.00543452	2.26484
384	FHS	AgeAccelGrim	Gran	0.359723	0.0477395	3.56977e-13	12.4474
1097	JHS	AgeAccelGrim	Gran	0.260234	0.0291787	1.93914e-18	17.7124
791	InChianti	AgeAccelGrim	Gran	0.296129	0.0340042	1.78655e-17	16.748
384	BLSA	AgeAccelGrim	Gran	0.134818	0.0506973	0.00816068	2.08827
401	LBC21	AgeAccelGrim	Gran	0.136832	0.0495917	0.00606163	2.21741
1355	LBC36	AgeAccelGrim	Gran	0.262459	0.0262333	8.78368e-23	22.0563
998	WHI BA23 White	AgeAccelGrim	Gran	0.245069	0.03072	4.08282e-15	14.389
676	WHI BA23 AfricanA	AgeAccelGrim	Gran	0.188051	0.0378314	8.46738e-07	6.07225
433	WHI BA23 Hispanic	AgeAccelGrim	Gran	0.249278	0.0466477	1.47759e-07	6.83045
6519	Meta	AgeAccelGrim	Gran	0.246903	0.0119997	4.51621e-94	93.3452
384	FHS	DNAmADMAdjAge	Bcell	-0.10237	0.0508957	0.0449874	1.34691
1097	JHS	DNAmADMAdjAge	Bcell	-0.16982	0.029781	1.51935e-08	7.81834
791	InChianti	DNAmADMAdjAge	Bcell	-0.0639651	0.035528	0.0721775	1.1416
384	BLSA	DNAmADMAdjAge	Bcell	-0.201484	0.0501152	7.00148e-05	4.15481
401	LBC21	DNAmADMAdjAge	Bcell	0.0057755	0.0500618	0.908212	0.0418128
1355	LBC36	DNAmADMAdjAge	Bcell	-0.0902389	0.0270754	0.000882782	3.05415
998	WHI BA23 White	DNAmADMAdjAge	Bcell	-0.180992	0.0311629	8.50122e-09	8.07052
676	WHI BA23 AfricanA	DNAmADMAdjAge	Bcell	-0.154169	0.0380581	5.69596e-05	4.24443
433	WHI BA23 Hispanic	DNAmADMAdjAge	Bcell	-0.285139	0.0461687	1.52129e-09	8.81779
6519	Meta	DNAmADMAdjAge	Bcell	-0.136601	0.0122569	7.58784e-29	28.1199
384	FHS	DNAmADMAdjAge	CD4T	-0.165444	0.0504594	0.00113825	2.94376
1097	JHS	DNAmADMAdjAge	CD4T	-0.129807	0.0299642	1.61275e-05	4.79243
791	InChianti	DNAmADMAdjAge	CD4T	-0.0793852	0.0354886	0.02557	1.59227
384	BLSA	DNAmADMAdjAge	CD4T	-0.163156	0.0504789	0.00133526	2.87444
401	LBC21	DNAmADMAdjAge	CD4T	-0.306941	0.047646	3.396e-10	9.46903
1355	LBC36	DNAmADMAdjAge	CD4T	-0.21351	0.0265595	1.95921e-15	14.7079
998	WHI BA23 White	DNAmADMAdjAge	CD4T	-0.113793	0.0314804	0.000315719	3.5007
676	WHI BA23 AfricanA	DNAmADMAdjAge	CD4T	-0.0929681	0.0383517	0.0156089	1.80663
433	WHI BA23 Hispanic	DNAmADMAdjAge	CD4T	-0.163011	0.047524	0.000661546	3.17944
6519	Meta	DNAmADMAdjAge	CD4T	-0.153335	0.0122327	4.80977e-36	35.3179
384	FHS	DNAmADMAdjAge	CD4.naive	-0.0151828	0.0511586	0.766796	0.11532
1097	JHS	DNAmADMAdjAge	CD4.naive	-0.0348577	0.0302015	0.248682	0.604355
791	InChianti	DNAmADMAdjAge	CD4.naive	0.0249912	0.0355898	0.482761	0.316268
384	BLSA	DNAmADMAdjAge	CD4.naive	-0.111498	0.0508454	0.0289189	1.53882
401	LBC21	DNAmADMAdjAge	CD4.naive	-0.0425696	0.0500172	0.395225	0.403155
1355	LBC36	DNAmADMAdjAge	CD4.naive	0.0573352	0.0271416	0.0348313	1.45803
998	WHI BA23 White	DNAmADMAdjAge	CD4.naive	0.0608619	0.0316275	0.054597	1.26283
676	WHI BA23 AfricanA	DNAmADMAdjAge	CD4.naive	-0.0440731	0.0384811	0.252484	0.597766
433	WHI BA23 Hispanic	DNAmADMAdjAge	CD4.naive	-0.0369385	0.0481354	0.443271	0.35333
6519	Meta	DNAmADMAdjAge	CD4.naive	0.00130982	0.0123858	0.91578	0.038209
384	FHS	DNAmADMAdjAge	CD8.naive	-0.145016	0.0506236	0.00440609	2.35595
1097	JHS	DNAmADMAdjAge	CD8.naive	-0.129411	0.0299658	1.71232e-05	4.76642
791	InChianti	DNAmADMAdjAge	CD8.naive	0.107709	0.0353938	0.00241876	2.61641
384	BLSA	DNAmADMAdjAge	CD8.naive	-0.226299	0.0498371	7.52403e-06	5.12355
401	LBC21	DNAmADMAdjAge	CD8.naive	0.0419494	0.0500185	0.402153	0.395609
1355	LBC36	DNAmADMAdjAge	CD8.naive	0.067682	0.027124	0.0127042	1.89605
998	WHI BA23 White	DNAmADMAdjAge	CD8.naive	-0.0464228	0.0316521	0.142784	0.845321
676	WHI BA23 AfricanA	DNAmADMAdjAge	CD8.naive	-0.172854	0.0379388	6.18531e-06	5.20864
433	WHI BA23 Hispanic	DNAmADMAdjAge	CD8.naive	-0.0250196	0.0481532	0.603621	0.219236
6519	Meta	DNAmADMAdjAge	CD8.naive	-0.0416363	0.0123205	0.000726345	3.13886
384	FHS	DNAmADMAdjAge	CD8T	-0.19095	0.050223	0.00016699	3.77731
1097	JHS	DNAmADMAdjAge	CD8T	-0.158575	0.0298375	1.29463e-07	6.88785
791	InChianti	DNAmADMAdjAge	CD8T	-0.173902	0.0350585	8.62109e-07	6.06444
384	BLSA	DNAmADMAdjAge	CD8T	-0.207162	0.0500545	4.29983e-05	4.36655
401	LBC21	DNAmADMAdjAge	CD8T	0.0998679	0.0498123	0.0456508	1.34055
1355	LBC36	DNAmADMAdjAge	CD8T	-0.0215892	0.02718	0.427158	0.369411
998	WHI BA23 White	DNAmADMAdjAge	CD8T	-0.0441858	0.0316553	0.163072	0.78762
676	WHI BA23 AfricanA	DNAmADMAdjAge	CD8T	-0.0145143	0.0385145	0.706402	0.150948
433	WHI BA23 Hispanic	DNAmADMAdjAge	CD8T	-0.0297591	0.048147	0.536843	0.270153
6519	Meta	DNAmADMAdjAge	CD8T	-0.0809528	0.0123161	4.93357e-11	10.3068
384	FHS	DNAmADMAdjAge	CD8.ex	0.18011	0.0503277	0.000389696	3.40927
1097	JHS	DNAmADMAdjAge	CD8.ex	0.0668446	0.0301523	0.0268349	1.5713
791	InChianti	DNAmADMAdjAge	CD8.ex	-0.0723817	0.0355076	0.0418341	1.37847
384	BLSA	DNAmADMAdjAge	CD8.ex	0.242835	0.049633	1.46966e-06	5.83278
401	LBC21	DNAmADMAdjAge	CD8.ex	0.0307457	0.0500389	0.539278	0.268187
1355	LBC36	DNAmADMAdjAge	CD8.ex	0.0176192	0.0271821	0.516971	0.286534
998	WHI BA23 White	DNAmADMAdjAge	CD8.ex	0.0853526	0.0315706	0.0069772	2.15632
676	WHI BA23 AfricanA	DNAmADMAdjAge	CD8.ex	0.134178	0.0381702	0.000468745	3.32906
433	WHI BA23 Hispanic	DNAmADMAdjAge	CD8.ex	0.102131	0.0479164	0.0336185	1.47342
6519	Meta	DNAmADMAdjAge	CD8.ex	0.0675817	0.0123355	4.28635e-08	7.36791
384	FHS	DNAmADMAdjAge	NK	-0.217023	0.049945	1.78559e-05	4.74822
1097	JHS	DNAmADMAdjAge	NK	-0.0767514	0.0301308	0.0109926	1.9589
791	InChianti	DNAmADMAdjAge	NK	-0.184496	0.0349898	1.73569e-07	6.76053
384	BLSA	DNAmADMAdjAge	NK	-0.10833	0.0508634	0.0338255	1.47076
401	LBC21	DNAmADMAdjAge	NK	-0.150767	0.0494904	0.00246991	2.60732
1355	LBC36	DNAmADMAdjAge	NK	-0.166798	0.0268055	6.50985e-10	9.18643
998	WHI BA23 White	DNAmADMAdjAge	NK	-0.162536	0.0312649	2.43489e-07	6.61352
676	WHI BA23 AfricanA	DNAmADMAdjAge	NK	-0.0278183	0.0385037	0.470247	0.327674
433	WHI BA23 Hispanic	DNAmADMAdjAge	NK	-0.101383	0.0479201	0.0349468	1.45659
6519	Meta	DNAmADMAdjAge	NK	-0.133609	0.0122732	1.34011e-27	26.8729
384	FHS	DNAmADMAdjAge	PB	0.287722	0.0490009	9.376e-09	8.02798
1097	JHS	DNAmADMAdjAge	PB	0.215733	0.0295083	5.10989e-13	12.2916
791	InChianti	DNAmADMAdjAge	PB	0.19938	0.0348862	1.5538e-08	7.8086
384	BLSA	DNAmADMAdjAge	PB	0.224176	0.0498622	9.19936e-06	5.03624
401	LBC21	DNAmADMAdjAge	PB	0.408838	0.0456875	1.37283e-17	16.8624
1355	LBC36	DNAmADMAdjAge	PB	0.348176	0.0254853	6.67992e-40	39.1752
998	WHI BA23 White	DNAmADMAdjAge	PB	0.206714	0.0310018	4.29602e-11	10.3669
676	WHI BA23 AfricanA	DNAmADMAdjAge	PB	0.114244	0.0382664	0.00293384	2.53256
433	WHI BA23 Hispanic	DNAmADMAdjAge	PB	0.148314	0.0476356	0.00197194	2.70511
6519	Meta	DNAmADMAdjAge	PB	0.245563	0.0119766	2.00027e-93	92.6989
384	FHS	DNAmADMAdjAge	Mono	0.0132802	0.0511599	0.795326	0.0994546
1097	JHS	DNAmADMAdjAge	Mono	0.0822423	0.0301175	0.00642118	2.19238
791	InChianti	DNAmADMAdjAge	Mono	-0.010625	0.0355989	0.765428	0.116096
384	BLSA	DNAmADMAdjAge	Mono	0.131175	0.0507223	0.0100749	1.99676
401	LBC21	DNAmADMAdjAge	Mono	-0.0560734	0.0499839	0.262609	0.58069
1355	LBC36	DNAmADMAdjAge	Mono	-0.0942119	0.0270654	0.000515641	3.28765
998	WHI BA23 White	DNAmADMAdjAge	Mono	-0.0869198	0.0315663	0.0060023	2.22168
676	WHI BA23 AfricanA	DNAmADMAdjAge	Mono	0.0529878	0.0384644	0.16879	0.772652
433	WHI BA23 Hispanic	DNAmADMAdjAge	Mono	-0.0245966	0.0481537	0.609757	0.214843
6519	Meta	DNAmADMAdjAge	Mono	-0.0114299	0.012367	0.355367	0.449323
384	FHS	DNAmADMAdjAge	Gran	0.263189	0.0493606	1.66634e-07	6.77824
1097	JHS	DNAmADMAdjAge	Gran	0.218488	0.0294898	2.53806e-13	12.5955
791	InChianti	DNAmADMAdjAge	Gran	0.187779	0.0349676	1.03607e-07	6.98461
384	BLSA	DNAmADMAdjAge	Gran	0.245586	0.0495975	1.10696e-06	5.95587
401	LBC21	DNAmADMAdjAge	Gran	0.24027	0.0485961	1.128e-06	5.94769
1355	LBC36	DNAmADMAdjAge	Gran	0.244903	0.0263585	5.89414e-20	19.2296
998	WHI BA23 White	DNAmADMAdjAge	Gran	0.213023	0.0309589	1.05059e-11	10.9786
676	WHI BA23 AfricanA	DNAmADMAdjAge	Gran	0.0966199	0.0383383	0.011959	1.9223
433	WHI BA23 Hispanic	DNAmADMAdjAge	Gran	0.230797	0.0468678	1.20757e-06	5.91809
6519	Meta	DNAmADMAdjAge	Gran	0.213871	0.0121033	7.08652e-70	69.1496
384	FHS	DNAmB2MAdjAge	Bcell	-0.033046	0.0511365	0.518517	0.285237
1097	JHS	DNAmB2MAdjAge	Bcell	-0.00192867	0.0302198	0.949124	0.022677
791	InChianti	DNAmB2MAdjAge	Bcell	-0.116661	0.0353579	0.00101224	2.99472
384	BLSA	DNAmB2MAdjAge	Bcell	-0.0109602	0.0511614	0.830484	0.0806688
401	LBC21	DNAmB2MAdjAge	Bcell	0.111107	0.0497526	0.0260898	1.58353
1355	LBC36	DNAmB2MAdjAge	Bcell	-0.0595128	0.0271382	0.0284804	1.54545
998	WHI BA23 White	DNAmB2MAdjAge	Bcell	-0.168607	0.0312326	8.4044e-08	7.07549
676	WHI BA23 AfricanA	DNAmB2MAdjAge	Bcell	-0.0370439	0.0384921	0.336205	0.473395
433	WHI BA23 Hispanic	DNAmB2MAdjAge	Bcell	-0.0648119	0.048067	0.178249	0.748972
6519	Meta	DNAmB2MAdjAge	Bcell	-0.0570753	0.0123522	3.82553e-06	5.41731
384	FHS	DNAmB2MAdjAge	CD4T	-0.259816	0.0494074	2.42155e-07	6.61591
1097	JHS	DNAmB2MAdjAge	CD4T	-0.11341	0.0300249	0.000167126	3.77696
791	InChianti	DNAmB2MAdjAge	CD4T	-0.268741	0.0342913	1.49225e-14	13.8262
384	BLSA	DNAmB2MAdjAge	CD4T	-0.140365	0.0506579	0.00586455	2.23177
401	LBC21	DNAmB2MAdjAge	CD4T	-0.0805573	0.0498999	0.107236	0.96966
1355	LBC36	DNAmB2MAdjAge	CD4T	-0.153014	0.0268662	1.50797e-08	7.82161
998	WHI BA23 White	DNAmB2MAdjAge	CD4T	-0.297699	0.0302496	7.14271e-22	21.1461
676	WHI BA23 AfricanA	DNAmB2MAdjAge	CD4T	-0.137631	0.038152	0.000332095	3.47874
433	WHI BA23 Hispanic	DNAmB2MAdjAge	CD4T	-0.2217	0.0469696	3.19249e-06	5.49587
6519	Meta	DNAmB2MAdjAge	CD4T	-0.188843	0.0121454	1.62661e-54	53.7887
384	FHS	DNAmB2MAdjAge	CD4.naive	-0.201046	0.0501198	7.26559e-05	4.13873
1097	JHS	DNAmB2MAdjAge	CD4.naive	-0.0877467	0.0301033	0.00363101	2.43997
791	InChianti	DNAmB2MAdjAge	CD4.naive	-0.161728	0.0351323	4.84286e-06	5.3149
384	BLSA	DNAmB2MAdjAge	CD4.naive	-0.175817	0.0503675	0.000538061	3.26917
401	LBC21	DNAmB2MAdjAge	CD4.naive	-0.265462	0.0482664	6.7991e-08	7.16755
1355	LBC36	DNAmB2MAdjAge	CD4.naive	-0.194259	0.0266685	5.47565e-13	12.2616
998	WHI BA23 White	DNAmB2MAdjAge	CD4.naive	-0.209835	0.0309808	2.15223e-11	10.6671
676	WHI BA23 AfricanA	DNAmB2MAdjAge	CD4.naive	-0.125097	0.038216	0.00111678	2.95203
433	WHI BA23 Hispanic	DNAmB2MAdjAge	CD4.naive	-0.226102	0.0469209	2.00455e-06	5.69798
6519	Meta	DNAmB2MAdjAge	CD4.naive	-0.174241	0.0121969	2.68509e-46	45.571
384	FHS	DNAmB2MAdjAge	CD8.naive	-0.297214	0.0488524	2.85108e-09	8.54499
1097	JHS	DNAmB2MAdjAge	CD8.naive	-0.140025	0.0299222	3.23327e-06	5.49036
791	InChianti	DNAmB2MAdjAge	CD8.naive	0.0782869	0.0354917	0.0276868	1.55773
384	BLSA	DNAmB2MAdjAge	CD8.naive	-0.216115	0.0499553	1.93948e-05	4.71232
401	LBC21	DNAmB2MAdjAge	CD8.naive	-0.377207	0.0463644	5.2505e-15	14.2798
1355	LBC36	DNAmB2MAdjAge	CD8.naive	-0.303083	0.0259076	3.4845e-30	29.4579
998	WHI BA23 White	DNAmB2MAdjAge	CD8.naive	-0.30015	0.0302252	3.17853e-22	21.4978
676	WHI BA23 AfricanA	DNAmB2MAdjAge	CD8.naive	-0.184585	0.0378567	1.35233e-06	5.86892
433	WHI BA23 Hispanic	DNAmB2MAdjAge	CD8.naive	-0.283068	0.0461982	2.01853e-09	8.69497
6519	Meta	DNAmB2MAdjAge	CD8.naive	-0.219159	0.0119982	1.54608e-74	73.8108
384	FHS	DNAmB2MAdjAge	CD8T	-0.102973	0.0508925	0.0437334	1.35919
1097	JHS	DNAmB2MAdjAge	CD8T	-0.0311334	0.0302052	0.302896	0.518706
791	InChianti	DNAmB2MAdjAge	CD8T	-0.133308	0.0352832	0.000169835	3.76997
384	BLSA	DNAmB2MAdjAge	CD8T	0.0434639	0.0511161	0.395692	0.402643
401	LBC21	DNAmB2MAdjAge	CD8T	-0.058319	0.0499774	0.243945	0.612708
1355	LBC36	DNAmB2MAdjAge	CD8T	-0.0911512	0.0270732	0.000781678	3.10697
998	WHI BA23 White	DNAmB2MAdjAge	CD8T	-0.0134209	0.0316834	0.671953	0.172661
676	WHI BA23 AfricanA	DNAmB2MAdjAge	CD8T	-0.0330252	0.0384975	0.391279	0.407513
433	WHI BA23 Hispanic	DNAmB2MAdjAge	CD8T	-0.00640529	0.0481673	0.894271	0.0485307
6519	Meta	DNAmB2MAdjAge	CD8T	-0.0536288	0.0123704	1.45595e-05	4.83685
384	FHS	DNAmB2MAdjAge	CD8.ex	0.311035	0.0486266	4.65367e-10	9.3322
1097	JHS	DNAmB2MAdjAge	CD8.ex	0.0680425	0.0301499	0.0242163	1.61589
791	InChianti	DNAmB2MAdjAge	CD8.ex	0.0517754	0.0355532	0.145713	0.836501
384	BLSA	DNAmB2MAdjAge	CD8.ex	0.133194	0.0507086	0.00896989	2.04721
401	LBC21	DNAmB2MAdjAge	CD8.ex	0.262014	0.0483136	1.01662e-07	6.99284
1355	LBC36	DNAmB2MAdjAge	CD8.ex	0.239596	0.0263945	3.82119e-19	18.4178
998	WHI BA23 White	DNAmB2MAdjAge	CD8.ex	0.236855	0.0307846	3.42213e-14	13.4657
676	WHI BA23 AfricanA	DNAmB2MAdjAge	CD8.ex	0.113702	0.0382688	0.00307259	2.5125
433	WHI BA23 Hispanic	DNAmB2MAdjAge	CD8.ex	0.166991	0.0474919	0.000484193	3.31498
6519	Meta	DNAmB2MAdjAge	CD8.ex	0.171441	0.0121732	4.79841e-45	44.3189
384	FHS	DNAmB2MAdjAge	NK	-0.0717164	0.0510327	0.160744	0.793865
1097	JHS	DNAmB2MAdjAge	NK	0.0108244	0.0302181	0.720255	0.142514
791	InChianti	DNAmB2MAdjAge	NK	-0.0739551	0.0355035	0.0375691	1.42517
384	BLSA	DNAmB2MAdjAge	NK	0.0300153	0.0511414	0.557612	0.253668
401	LBC21	DNAmB2MAdjAge	NK	0.0230054	0.0500494	0.646015	0.189757
1355	LBC36	DNAmB2MAdjAge	NK	-0.0702838	0.0271191	0.00965402	2.01529
998	WHI BA23 White	DNAmB2MAdjAge	NK	-0.0794922	0.0315859	0.0120022	1.92074
676	WHI BA23 AfricanA	DNAmB2MAdjAge	NK	-0.0840464	0.0383823	0.0288867	1.5393
433	WHI BA23 Hispanic	DNAmB2MAdjAge	NK	-0.0171565	0.0481612	0.721842	0.141558
6519	Meta	DNAmB2MAdjAge	NK	-0.0449565	0.0123788	0.000281511	3.55051
384	FHS	DNAmB2MAdjAge	PB	0.205007	0.0500777	5.18195e-05	4.28551
1097	JHS	DNAmB2MAdjAge	PB	0.0873567	0.0301044	0.0037846	2.42198
791	InChianti	DNAmB2MAdjAge	PB	0.215646	0.0347633	8.91948e-10	9.04966
384	BLSA	DNAmB2MAdjAge	PB	0.0456024	0.0511112	0.372838	0.42848
401	LBC21	DNAmB2MAdjAge	PB	-0.157638	0.0494367	0.001542	2.81192
1355	LBC36	DNAmB2MAdjAge	PB	-0.0586774	0.0271395	0.0307881	1.51162
998	WHI BA23 White	DNAmB2MAdjAge	PB	0.245638	0.0307154	3.51336e-15	14.4543
676	WHI BA23 AfricanA	DNAmB2MAdjAge	PB	0.150343	0.0380808	8.70873e-05	4.06005
433	WHI BA23 Hispanic	DNAmB2MAdjAge	PB	0.1769	0.0474086	0.000215924	3.6657
6519	Meta	DNAmB2MAdjAge	PB	0.100786	0.0122409	1.8181e-16	15.7404
384	FHS	DNAmB2MAdjAge	Mono	0.0950032	0.050933	0.0629118	1.20127
1097	JHS	DNAmB2MAdjAge	Mono	0.0495152	0.0301828	0.101186	0.994878
791	InChianti	DNAmB2MAdjAge	Mono	0.0721101	0.0355083	0.0426103	1.37049
384	BLSA	DNAmB2MAdjAge	Mono	0.108492	0.0508624	0.0335574	1.47421
401	LBC21	DNAmB2MAdjAge	Mono	0.138524	0.04958	0.005458	2.26297
1355	LBC36	DNAmB2MAdjAge	Mono	0.163174	0.026822	1.52694e-09	8.81618
998	WHI BA23 White	DNAmB2MAdjAge	Mono	0.0750193	0.0315969	0.0177728	1.75024
676	WHI BA23 AfricanA	DNAmB2MAdjAge	Mono	0.0607524	0.0384474	0.114543	0.94103
433	WHI BA23 Hispanic	DNAmB2MAdjAge	Mono	0.108153	0.0478858	0.0244098	1.61244
6519	Meta	DNAmB2MAdjAge	Mono	0.0968493	0.0123336	4.07835e-15	14.3895
384	FHS	DNAmB2MAdjAge	Gran	0.196036	0.0501717	0.000110383	3.9571
1097	JHS	DNAmB2MAdjAge	Gran	0.0710313	0.0301436	0.0186267	1.72986
791	InChianti	DNAmB2MAdjAge	Gran	0.234699	0.0346065	2.32534e-11	10.6335
384	BLSA	DNAmB2MAdjAge	Gran	0.0293963	0.0511423	0.56577	0.24736
401	LBC21	DNAmB2MAdjAge	Gran	-0.0863053	0.0498758	0.0843313	1.07401
1355	LBC36	DNAmB2MAdjAge	Gran	0.0349186	0.0271698	0.198943	0.701271
998	WHI BA23 White	DNAmB2MAdjAge	Gran	0.241288	0.03075	1.09697e-14	13.9598
676	WHI BA23 AfricanA	DNAmB2MAdjAge	Gran	0.135115	0.0381653	0.000427249	3.36932
433	WHI BA23 Hispanic	DNAmB2MAdjAge	Gran	0.136143	0.0477198	0.00453979	2.34296
6519	Meta	DNAmB2MAdjAge	Gran	0.117745	0.0122581	7.5813e-22	21.1203
384	FHS	DNAmCystatinCAdjAge	Bcell	-0.129375	0.0507345	0.0111606	1.95231
1097	JHS	DNAmCystatinCAdjAge	Bcell	-0.286409	0.0289539	3.71064e-22	21.4306
791	InChianti	DNAmCystatinCAdjAge	Bcell	-0.199208	0.0348874	1.59947e-08	7.79602
384	BLSA	DNAmCystatinCAdjAge	Bcell	-0.158909	0.0505143	0.00178604	2.74811
401	LBC21	DNAmCystatinCAdjAge	Bcell	-0.0616522	0.0499674	0.217985	0.661573
1355	LBC36	DNAmCystatinCAdjAge	Bcell	-0.158855	0.0268411	4.11516e-09	8.38561
998	WHI BA23 White	DNAmCystatinCAdjAge	Bcell	-0.257521	0.0306175	1.39725e-16	15.8547
676	WHI BA23 AfricanA	DNAmCystatinCAdjAge	Bcell	-0.176547	0.0379135	3.87386e-06	5.41186
433	WHI BA23 Hispanic	DNAmCystatinCAdjAge	Bcell	-0.187281	0.047316	8.8346e-05	4.05381
6519	Meta	DNAmCystatinCAdjAge	Bcell	-0.197898	0.0121335	8.36842e-60	59.0774
384	FHS	DNAmCystatinCAdjAge	CD4T	-0.270638	0.0492551	7.16584e-08	7.14473
1097	JHS	DNAmCystatinCAdjAge	CD4T	-0.32767	0.0285515	7.18952e-29	28.1433
791	InChianti	DNAmCystatinCAdjAge	CD4T	-0.281924	0.0341569	6.4252e-16	15.1921
384	BLSA	DNAmCystatinCAdjAge	CD4T	-0.295829	0.0488744	3.40102e-09	8.46839
401	LBC21	DNAmCystatinCAdjAge	CD4T	-0.15241	0.0494778	0.00221059	2.65549
1355	LBC36	DNAmCystatinCAdjAge	CD4T	-0.238698	0.0264005	5.21891e-19	18.2824
998	WHI BA23 White	DNAmCystatinCAdjAge	CD4T	-0.387688	0.0292081	3.8513e-37	36.4144
676	WHI BA23 AfricanA	DNAmCystatinCAdjAge	CD4T	-0.281306	0.0369631	9.23476e-14	13.0346
433	WHI BA23 Hispanic	DNAmCystatinCAdjAge	CD4T	-0.322058	0.0456019	6.60273e-12	11.1803
6519	Meta	DNAmCystatinCAdjAge	CD4T	-0.29385	0.0118321	3.76722e-136	135.424
384	FHS	DNAmCystatinCAdjAge	CD4.naive	-0.150545	0.0505813	0.00310325	2.50818
1097	JHS	DNAmCystatinCAdjAge	CD4.naive	-0.183767	0.0297052	8.68305e-10	9.06133
791	InChianti	DNAmCystatinCAdjAge	CD4.naive	-0.180592	0.0350156	3.16825e-07	6.49918
384	BLSA	DNAmCystatinCAdjAge	CD4.naive	-0.200313	0.0501274	7.72907e-05	4.11187
401	LBC21	DNAmCystatinCAdjAge	CD4.naive	-0.220616	0.0488291	8.2302e-06	5.08459
1355	LBC36	DNAmCystatinCAdjAge	CD4.naive	-0.186263	0.0267106	4.8247e-12	11.3165
998	WHI BA23 White	DNAmCystatinCAdjAge	CD4.naive	-0.222804	0.0308897	1.08318e-12	11.9653
676	WHI BA23 AfricanA	DNAmCystatinCAdjAge	CD4.naive	-0.217549	0.037596	1.10105e-08	7.95819
433	WHI BA23 Hispanic	DNAmCystatinCAdjAge	CD4.naive	-0.21413	0.047051	6.95284e-06	5.15784
6519	Meta	DNAmCystatinCAdjAge	CD4.naive	-0.196846	0.0121572	5.77564e-59	58.2384
384	FHS	DNAmCystatinCAdjAge	CD8.naive	-0.164062	0.0504712	0.00125382	2.90177
1097	JHS	DNAmCystatinCAdjAge	CD8.naive	-0.135251	0.0299422	6.94991e-06	5.15802
791	InChianti	DNAmCystatinCAdjAge	CD8.naive	-0.00264275	0.0356008	0.940844	0.0264824
384	BLSA	DNAmCystatinCAdjAge	CD8.naive	-0.182746	0.0503028	0.000318502	3.49689
401	LBC21	DNAmCystatinCAdjAge	CD8.naive	-0.308515	0.0476205	2.73018e-10	9.56381
1355	LBC36	DNAmCystatinCAdjAge	CD8.naive	-0.208884	0.0265866	7.9841e-15	14.0978
998	WHI BA23 White	DNAmCystatinCAdjAge	CD8.naive	-0.165748	0.0312479	1.39379e-07	6.8558
676	WHI BA23 AfricanA	DNAmCystatinCAdjAge	CD8.naive	-0.267091	0.0371192	1.66293e-12	11.7791
433	WHI BA23 Hispanic	DNAmCystatinCAdjAge	CD8.naive	-0.183054	0.0473544	0.000127873	3.89322
6519	Meta	DNAmCystatinCAdjAge	CD8.naive	-0.172955	0.0121773	8.76762e-46	45.0571
384	FHS	DNAmCystatinCAdjAge	CD8T	-0.0184485	0.0511557	0.718572	0.14353
1097	JHS	DNAmCystatinCAdjAge	CD8T	-0.140903	0.0299184	2.80084e-06	5.55271
791	InChianti	DNAmCystatinCAdjAge	CD8T	-0.0394381	0.0355732	0.267921	0.571994
384	BLSA	DNAmCystatinCAdjAge	CD8T	-0.0189684	0.0511552	0.710991	0.148136
401	LBC21	DNAmCystatinCAdjAge	CD8T	-0.0857274	0.0498783	0.0864391	1.06329
1355	LBC36	DNAmCystatinCAdjAge	CD8T	-0.0753476	0.0271091	0.00552093	2.25799
998	WHI BA23 White	DNAmCystatinCAdjAge	CD8T	0.0679218	0.031613	0.0319117	1.49605
676	WHI BA23 AfricanA	DNAmCystatinCAdjAge	CD8T	-0.0954798	0.0383426	0.0130078	1.8858
433	WHI BA23 Hispanic	DNAmCystatinCAdjAge	CD8T	0.0265094	0.0481514	0.582232	0.234904
6519	Meta	DNAmCystatinCAdjAge	CD8T	-0.0497079	0.0123594	5.7736e-05	4.23855
384	FHS	DNAmCystatinCAdjAge	CD8.ex	0.203064	0.0500985	6.12118e-05	4.21316
1097	JHS	DNAmCystatinCAdjAge	CD8.ex	0.201819	0.0295981	1.51616e-11	10.8193
791	InChianti	DNAmCystatinCAdjAge	CD8.ex	0.09999	0.0354225	0.00488077	2.31151
384	BLSA	DNAmCystatinCAdjAge	CD8.ex	0.183499	0.0502957	0.000300532	3.52211
401	LBC21	DNAmCystatinCAdjAge	CD8.ex	0.201417	0.0490366	4.85508e-05	4.3138
1355	LBC36	DNAmCystatinCAdjAge	CD8.ex	0.249949	0.0263234	9.55633e-21	20.0197
998	WHI BA23 White	DNAmCystatinCAdjAge	CD8.ex	0.235024	0.0307987	5.43783e-14	13.2646
676	WHI BA23 AfricanA	DNAmCystatinCAdjAge	CD8.ex	0.221814	0.037559	5.56746e-09	8.25434
433	WHI BA23 Hispanic	DNAmCystatinCAdjAge	CD8.ex	0.153229	0.0475995	0.001383	2.85918
6519	Meta	DNAmCystatinCAdjAge	CD8.ex	0.203162	0.0121306	5.87136e-63	62.2313
384	FHS	DNAmCystatinCAdjAge	NK	-0.0776663	0.0510099	0.128693	0.890446
1097	JHS	DNAmCystatinCAdjAge	NK	0.00318077	0.0302197	0.916193	0.0380131
791	InChianti	DNAmCystatinCAdjAge	NK	0.0586886	0.0355396	0.0990631	1.00409
384	BLSA	DNAmCystatinCAdjAge	NK	-0.0315654	0.051139	0.537439	0.26967
401	LBC21	DNAmCystatinCAdjAge	NK	-0.0830444	0.0498897	0.0967856	1.01419
1355	LBC36	DNAmCystatinCAdjAge	NK	-0.00492587	0.027186	0.856245	0.0674022
998	WHI BA23 White	DNAmCystatinCAdjAge	NK	-0.0711815	0.0316058	0.0245292	1.61032
676	WHI BA23 AfricanA	DNAmCystatinCAdjAge	NK	0.0168777	0.0385131	0.661358	0.179563
433	WHI BA23 Hispanic	DNAmCystatinCAdjAge	NK	0.0193962	0.0481592	0.68733	0.162834
6519	Meta	DNAmCystatinCAdjAge	NK	-0.0128197	0.0123895	0.300799	0.521724
384	FHS	DNAmCystatinCAdjAge	PB	0.18733	0.0502587	0.000222788	3.65211
1097	JHS	DNAmCystatinCAdjAge	PB	0.229412	0.0294139	1.44281e-14	13.8408
791	InChianti	DNAmCystatinCAdjAge	PB	0.0659342	0.0355235	0.0638158	1.19507
384	BLSA	DNAmCystatinCAdjAge	PB	0.177117	0.0503555	0.000488361	3.31126
401	LBC21	DNAmCystatinCAdjAge	PB	-0.0917235	0.0498516	0.0665208	1.17704
1355	LBC36	DNAmCystatinCAdjAge	PB	-0.0256788	0.0271774	0.3449	0.462306
998	WHI BA23 White	DNAmCystatinCAdjAge	PB	0.185699	0.0311351	3.40899e-09	8.46737
676	WHI BA23 AfricanA	DNAmCystatinCAdjAge	PB	0.141166	0.0381328	0.000231422	3.6356
433	WHI BA23 Hispanic	DNAmCystatinCAdjAge	PB	0.0886977	0.0479785	0.0651861	1.18585
6519	Meta	DNAmCystatinCAdjAge	PB	0.107832	0.0122642	1.46315e-18	17.8347
384	FHS	DNAmCystatinCAdjAge	Mono	0.0577602	0.051079	0.258849	0.586954
1097	JHS	DNAmCystatinCAdjAge	Mono	0.141911	0.0299141	2.3728e-06	5.62474
791	InChianti	DNAmCystatinCAdjAge	Mono	0.077703	0.0354933	0.0288725	1.53952
384	BLSA	DNAmCystatinCAdjAge	Mono	0.177565	0.0503514	0.000472227	3.32585
401	LBC21	DNAmCystatinCAdjAge	Mono	0.170304	0.0493313	0.000615367	3.21087
1355	LBC36	DNAmCystatinCAdjAge	Mono	0.156308	0.0268522	7.29367e-09	8.13705
998	WHI BA23 White	DNAmCystatinCAdjAge	Mono	0.0299508	0.031672	0.344554	0.462743
676	WHI BA23 AfricanA	DNAmCystatinCAdjAge	Mono	0.139036	0.0381444	0.000287976	3.54064
433	WHI BA23 Hispanic	DNAmCystatinCAdjAge	Mono	0.084779	0.0479949	0.0780337	1.10772
6519	Meta	DNAmCystatinCAdjAge	Mono	0.115278	0.0123044	7.33222e-21	20.1348
384	FHS	DNAmCystatinCAdjAge	Gran	0.226356	0.0498365	7.48334e-06	5.1259
1097	JHS	DNAmCystatinCAdjAge	Gran	0.319889	0.028632	1.60463e-27	26.7946
791	InChianti	DNAmCystatinCAdjAge	Gran	0.136927	0.0352656	0.000111931	3.95105
384	BLSA	DNAmCystatinCAdjAge	Gran	0.205954	0.0500676	4.77501e-05	4.32103
401	LBC21	DNAmCystatinCAdjAge	Gran	0.0555474	0.0499853	0.267119	0.573295
1355	LBC36	DNAmCystatinCAdjAge	Gran	0.0814839	0.027096	0.002685	2.57106
998	WHI BA23 White	DNAmCystatinCAdjAge	Gran	0.263582	0.0305657	2.52704e-17	16.5974
676	WHI BA23 AfricanA	DNAmCystatinCAdjAge	Gran	0.192721	0.0377965	4.44423e-07	6.3522
433	WHI BA23 Hispanic	DNAmCystatinCAdjAge	Gran	0.176076	0.0474157	0.000231297	3.63583
6519	Meta	DNAmCystatinCAdjAge	Gran	0.191415	0.0121242	3.775e-56	55.4231
384	FHS	DNAmGDF15AdjAge	Bcell	-0.264602	0.0493408	1.42265e-07	6.8469
1097	JHS	DNAmGDF15AdjAge	Bcell	-0.102609	0.0300604	0.000664967	3.1772
791	InChianti	DNAmGDF15AdjAge	Bcell	-0.154519	0.0351734	1.27029e-05	4.8961
384	BLSA	DNAmGDF15AdjAge	Bcell	-0.0560957	0.0510839	0.272848	0.564079
401	LBC21	DNAmGDF15AdjAge	Bcell	-0.0999506	0.0498119	0.0454709	1.34227
1355	LBC36	DNAmGDF15AdjAge	Bcell	-0.0903158	0.0270753	0.000873811	3.05858
998	WHI BA23 White	DNAmGDF15AdjAge	Bcell	-0.118995	0.0314611	0.000164648	3.78344
676	WHI BA23 AfricanA	DNAmGDF15AdjAge	Bcell	-0.0884802	0.0383675	0.0214062	1.66946
433	WHI BA23 Hispanic	DNAmGDF15AdjAge	Bcell	-0.0764863	0.0480272	0.111992	0.950814
6519	Meta	DNAmGDF15AdjAge	Bcell	-0.112984	0.0123099	4.37925e-20	19.3586
384	FHS	DNAmGDF15AdjAge	CD4T	-0.20763	0.0500494	4.12789e-05	4.38427
1097	JHS	DNAmGDF15AdjAge	CD4T	-0.160079	0.0298302	9.8026e-08	7.00866
791	InChianti	DNAmGDF15AdjAge	CD4T	-0.254242	0.0344311	3.90571e-13	12.4083
384	BLSA	DNAmGDF15AdjAge	CD4T	-0.183075	0.0502997	0.000310519	3.50791
401	LBC21	DNAmGDF15AdjAge	CD4T	-0.0980465	0.0498214	0.0497648	1.30308
1355	LBC36	DNAmGDF15AdjAge	CD4T	-0.202872	0.026621	4.72088e-14	13.326
998	WHI BA23 White	DNAmGDF15AdjAge	CD4T	-0.212656	0.0309615	1.1416e-11	10.9425
676	WHI BA23 AfricanA	DNAmGDF15AdjAge	CD4T	-0.154871	0.0380538	5.26307e-05	4.27876
433	WHI BA23 Hispanic	DNAmGDF15AdjAge	CD4T	-0.198895	0.0472059	3.0661e-05	4.51341
6519	Meta	DNAmGDF15AdjAge	CD4T	-0.191384	0.0121642	8.9363e-56	55.0488
384	FHS	DNAmGDF15AdjAge	CD4.naive	-0.0196931	0.0511545	0.700472	0.154609
1097	JHS	DNAmGDF15AdjAge	CD4.naive	-0.159353	0.0298337	1.12151e-07	6.9502
791	InChianti	DNAmGDF15AdjAge	CD4.naive	-0.166863	0.0351018	2.37375e-06	5.62457
384	BLSA	DNAmGDF15AdjAge	CD4.naive	-0.203412	0.0500948	5.94213e-05	4.22606
401	LBC21	DNAmGDF15AdjAge	CD4.naive	-0.142785	0.0495497	0.00416961	2.3799
1355	LBC36	DNAmGDF15AdjAge	CD4.naive	-0.181919	0.0267327	1.51244e-11	10.8203
998	WHI BA23 White	DNAmGDF15AdjAge	CD4.naive	-0.243452	0.0307329	6.24419e-15	14.2045
676	WHI BA23 AfricanA	DNAmGDF15AdjAge	CD4.naive	-0.312952	0.0365837	7.95762e-17	16.0992
433	WHI BA23 Hispanic	DNAmGDF15AdjAge	CD4.naive	-0.287269	0.046138	1.13468e-09	8.94513
6519	Meta	DNAmGDF15AdjAge	CD4.naive	-0.197453	0.0121285	1.3669e-59	58.8643
384	FHS	DNAmGDF15AdjAge	CD8.naive	-0.142678	0.050641	0.0050922	2.29309
1097	JHS	DNAmGDF15AdjAge	CD8.naive	-0.143411	0.0299075	1.84999e-06	5.73283
791	InChianti	DNAmGDF15AdjAge	CD8.naive	-0.0304098	0.0355845	0.393043	0.40556
384	BLSA	DNAmGDF15AdjAge	CD8.naive	-0.202621	0.0501032	6.35686e-05	4.19676
401	LBC21	DNAmGDF15AdjAge	CD8.naive	-0.384639	0.0462111	1.37453e-15	14.8618
1355	LBC36	DNAmGDF15AdjAge	CD8.naive	-0.350657	0.0254601	1.74394e-40	39.7585
998	WHI BA23 White	DNAmGDF15AdjAge	CD8.naive	-0.230194	0.0308353	1.81096e-13	12.7421
676	WHI BA23 AfricanA	DNAmGDF15AdjAge	CD8.naive	-0.33542	0.0362871	3.08046e-19	18.5114
433	WHI BA23 Hispanic	DNAmGDF15AdjAge	CD8.naive	-0.334727	0.0453897	8.52437e-13	12.0693
6519	Meta	DNAmGDF15AdjAge	CD8.naive	-0.242888	0.0119493	7.47738e-92	91.1263
384	FHS	DNAmGDF15AdjAge	CD8T	-0.0286294	0.0511435	0.575954	0.239612
1097	JHS	DNAmGDF15AdjAge	CD8T	-0.0570118	0.0301707	0.0590703	1.22863
791	InChianti	DNAmGDF15AdjAge	CD8T	-0.0416701	0.03557	0.241754	0.616627
384	BLSA	DNAmGDF15AdjAge	CD8T	0.000963124	0.0511644	0.984991	0.00656762
401	LBC21	DNAmGDF15AdjAge	CD8T	-0.00399447	0.0500622	0.936444	0.0285181
1355	LBC36	DNAmGDF15AdjAge	CD8T	-0.0185282	0.0271817	0.495581	0.304885
998	WHI BA23 White	DNAmGDF15AdjAge	CD8T	0.0607166	0.0316278	0.0551779	1.25823
676	WHI BA23 AfricanA	DNAmGDF15AdjAge	CD8T	0.0188068	0.0385117	0.625468	0.203795
433	WHI BA23 Hispanic	DNAmGDF15AdjAge	CD8T	0.107343	0.04789	0.0255049	1.59338
6519	Meta	DNAmGDF15AdjAge	CD8T	-0.00193885	0.0123885	0.875636	0.0576762
384	FHS	DNAmGDF15AdjAge	CD8.ex	0.272537	0.0492276	5.75467e-08	7.23998
1097	JHS	DNAmGDF15AdjAge	CD8.ex	0.114559	0.0300209	0.000143243	3.84393
791	InChianti	DNAmGDF15AdjAge	CD8.ex	0.10093	0.0354191	0.00449152	2.34761
384	BLSA	DNAmGDF15AdjAge	CD8.ex	0.141274	0.0506513	0.00554933	2.25576
401	LBC21	DNAmGDF15AdjAge	CD8.ex	0.32618	0.0473246	2.15166e-11	10.6672
1355	LBC36	DNAmGDF15AdjAge	CD8.ex	0.314665	0.0258054	1.59276e-32	31.7978
998	WHI BA23 White	DNAmGDF15AdjAge	CD8.ex	0.211143	0.0309719	1.60582e-11	10.7943
676	WHI BA23 AfricanA	DNAmGDF15AdjAge	CD8.ex	0.21129	0.0376489	2.92093e-08	7.53448
433	WHI BA23 Hispanic	DNAmGDF15AdjAge	CD8.ex	0.211859	0.0470749	8.7353e-06	5.05872
6519	Meta	DNAmGDF15AdjAge	CD8.ex	0.21265	0.0120767	2.12762e-69	68.6721
384	FHS	DNAmGDF15AdjAge	NK	-0.157644	0.0505247	0.00194495	2.71109
1097	JHS	DNAmGDF15AdjAge	NK	0.0120606	0.0302177	0.68988	0.161226
791	InChianti	DNAmGDF15AdjAge	NK	-0.00240874	0.0356008	0.946074	0.024075
384	BLSA	DNAmGDF15AdjAge	NK	-0.00618562	0.0511635	0.903834	0.0439111
401	LBC21	DNAmGDF15AdjAge	NK	-0.0403316	0.0500219	0.420563	0.376169
1355	LBC36	DNAmGDF15AdjAge	NK	0.0453911	0.0271583	0.0948839	1.02281
998	WHI BA23 White	DNAmGDF15AdjAge	NK	0.00917641	0.0316849	0.772171	0.112286
676	WHI BA23 AfricanA	DNAmGDF15AdjAge	NK	0.0696246	0.0384251	0.0704379	1.15219
433	WHI BA23 Hispanic	DNAmGDF15AdjAge	NK	0.0845184	0.047996	0.0789563	1.10261
6519	Meta	DNAmGDF15AdjAge	NK	0.0131268	0.0123837	0.289138	0.538894
384	FHS	DNAmGDF15AdjAge	PB	0.266005	0.0493211	1.21484e-07	6.91548
1097	JHS	DNAmGDF15AdjAge	PB	0.0606059	0.0301643	0.0447621	1.34909
791	InChianti	DNAmGDF15AdjAge	PB	0.137447	0.0352631	0.000105328	3.97746
384	BLSA	DNAmGDF15AdjAge	PB	0.123991	0.0507696	0.0150498	1.82247
401	LBC21	DNAmGDF15AdjAge	PB	-0.12623	0.0496622	0.0114068	1.94284
1355	LBC36	DNAmGDF15AdjAge	PB	-0.0235595	0.0271788	0.386187	0.413202
998	WHI BA23 White	DNAmGDF15AdjAge	PB	0.0950457	0.0315428	0.00265019	2.57672
676	WHI BA23 AfricanA	DNAmGDF15AdjAge	PB	0.0576544	0.0384545	0.134267	0.872032
433	WHI BA23 Hispanic	DNAmGDF15AdjAge	PB	0.0376198	0.0481342	0.434902	0.361608
6519	Meta	DNAmGDF15AdjAge	PB	0.0611881	0.0123331	7.00196e-07	6.15478
384	FHS	DNAmGDF15AdjAge	Mono	-0.0161033	0.0511578	0.753103	0.123146
1097	JHS	DNAmGDF15AdjAge	Mono	0.0409982	0.0301945	0.174806	0.757445
791	InChianti	DNAmGDF15AdjAge	Mono	0.0483896	0.0355592	0.17396	0.75955
384	BLSA	DNAmGDF15AdjAge	Mono	0.135986	0.0506892	0.00761933	2.11808
401	LBC21	DNAmGDF15AdjAge	Mono	0.152361	0.0494781	0.00221787	2.65406
1355	LBC36	DNAmGDF15AdjAge	Mono	0.112568	0.0270136	3.28076e-05	4.48403
998	WHI BA23 White	DNAmGDF15AdjAge	Mono	0.00108357	0.0316862	0.972727	0.012009
676	WHI BA23 AfricanA	DNAmGDF15AdjAge	Mono	0.0446527	0.0384801	0.246293	0.608548
433	WHI BA23 Hispanic	DNAmGDF15AdjAge	Mono	-0.0215554	0.0481571	0.654662	0.183983
6519	Meta	DNAmGDF15AdjAge	Mono	0.0563341	0.0123651	5.21648e-06	5.28262
384	FHS	DNAmGDF15AdjAge	Gran	0.329414	0.0483087	3.59685e-11	10.4441
1097	JHS	DNAmGDF15AdjAge	Gran	0.122204	0.0299934	4.94655e-05	4.3057
791	InChianti	DNAmGDF15AdjAge	Gran	0.162211	0.0351294	4.53299e-06	5.34362
384	BLSA	DNAmGDF15AdjAge	Gran	0.109704	0.0508556	0.0316156	1.5001
401	LBC21	DNAmGDF15AdjAge	Gran	0.0269693	0.0500444	0.590251	0.228963
1355	LBC36	DNAmGDF15AdjAge	Gran	0.0922756	0.0270704	0.00067185	3.17273
998	WHI BA23 White	DNAmGDF15AdjAge	Gran	0.139559	0.0313761	9.64587e-06	5.01566
676	WHI BA23 AfricanA	DNAmGDF15AdjAge	Gran	0.0863205	0.0383748	0.0248087	1.6054
433	WHI BA23 Hispanic	DNAmGDF15AdjAge	Gran	0.0818129	0.0480068	0.0890659	1.05029
6519	Meta	DNAmGDF15AdjAge	Gran	0.124202	0.0122815	4.84362e-24	23.3148
384	FHS	DNAmLeptinAdjAge	Bcell	-0.0617575	0.0510668	0.227278	0.643443
1097	JHS	DNAmLeptinAdjAge	Bcell	0.0882389	0.030102	0.00344528	2.46278
791	InChianti	DNAmLeptinAdjAge	Bcell	0.0511982	0.0355543	0.150264	0.823146
384	BLSA	DNAmLeptinAdjAge	Bcell	0.0230006	0.0511509	0.653209	0.184948
401	LBC21	DNAmLeptinAdjAge	Bcell	0.0473876	0.0500064	0.343891	0.463579
1355	LBC36	DNAmLeptinAdjAge	Bcell	0.0156447	0.027183	0.565028	0.24793
998	WHI BA23 White	DNAmLeptinAdjAge	Bcell	0.150604	0.0313248	1.76105e-06	5.75423
676	WHI BA23 AfricanA	DNAmLeptinAdjAge	Bcell	0.176968	0.0379106	3.66997e-06	5.43534
433	WHI BA23 Hispanic	DNAmLeptinAdjAge	Bcell	0.0869693	0.0479858	0.0706205	1.15107
6519	Meta	DNAmLeptinAdjAge	Bcell	0.0727589	0.012344	3.76373e-09	8.42438
384	FHS	DNAmLeptinAdjAge	CD4T	0.0927699	0.0509438	0.0693853	1.15873
1097	JHS	DNAmLeptinAdjAge	CD4T	0.10714	0.0300459	0.000378289	3.42218
791	InChianti	DNAmLeptinAdjAge	CD4T	0.0451795	0.0355646	0.204334	0.68966
384	BLSA	DNAmLeptinAdjAge	CD4T	-0.00359186	0.0511641	0.944069	0.0249963
401	LBC21	DNAmLeptinAdjAge	CD4T	-0.112616	0.0497441	0.0241165	1.61769
1355	LBC36	DNAmLeptinAdjAge	CD4T	-0.000460284	0.0271864	0.986494	0.00590538
998	WHI BA23 White	DNAmLeptinAdjAge	CD4T	0.103112	0.0315173	0.00110608	2.95621
676	WHI BA23 AfricanA	DNAmLeptinAdjAge	CD4T	0.188805	0.0378258	7.6383e-07	6.117
433	WHI BA23 Hispanic	DNAmLeptinAdjAge	CD4T	0.0407979	0.0481282	0.39708	0.401122
6519	Meta	DNAmLeptinAdjAge	CD4T	0.0603673	0.0123465	1.01134e-06	5.9951
384	FHS	DNAmLeptinAdjAge	CD4.naive	0.0222455	0.0511518	0.663886	0.177906
1097	JHS	DNAmLeptinAdjAge	CD4.naive	0.0494669	0.0301829	0.10152	0.993447
791	InChianti	DNAmLeptinAdjAge	CD4.naive	0.0560549	0.035545	0.115193	0.938574
384	BLSA	DNAmLeptinAdjAge	CD4.naive	-0.0409159	0.0511216	0.423997	0.372637
401	LBC21	DNAmLeptinAdjAge	CD4.naive	0.0272843	0.050044	0.585916	0.232165
1355	LBC36	DNAmLeptinAdjAge	CD4.naive	0.00831821	0.0271854	0.759667	0.119377
998	WHI BA23 White	DNAmLeptinAdjAge	CD4.naive	-0.102378	0.0315197	0.00120075	2.92055
676	WHI BA23 AfricanA	DNAmLeptinAdjAge	CD4.naive	-0.0578698	0.038454	0.132816	0.87675
433	WHI BA23 Hispanic	DNAmLeptinAdjAge	CD4.naive	-0.142542	0.0476764	0.00295162	2.52994
6519	Meta	DNAmLeptinAdjAge	CD4.naive	-0.0139731	0.0123758	0.258869	0.58692
384	FHS	DNAmLeptinAdjAge	CD8.naive	-0.108902	0.0508601	0.0328896	1.48294
1097	JHS	DNAmLeptinAdjAge	CD8.naive	-0.0161444	0.030216	0.593242	0.226768
791	InChianti	DNAmLeptinAdjAge	CD8.naive	0.226682	0.0346742	1.12282e-10	9.94969
384	BLSA	DNAmLeptinAdjAge	CD8.naive	-0.215312	0.0499644	2.08586e-05	4.68072
401	LBC21	DNAmLeptinAdjAge	CD8.naive	0.171997	0.0493166	0.000541572	3.26634
1355	LBC36	DNAmLeptinAdjAge	CD8.naive	-0.00357358	0.0271862	0.89544	0.0479635
998	WHI BA23 White	DNAmLeptinAdjAge	CD8.naive	-0.0756251	0.0315955	0.0168709	1.77286
676	WHI BA23 AfricanA	DNAmLeptinAdjAge	CD8.naive	-0.0836393	0.0383836	0.0296745	1.52762
433	WHI BA23 Hispanic	DNAmLeptinAdjAge	CD8.naive	-0.106385	0.047895	0.0268555	1.57097
6519	Meta	DNAmLeptinAdjAge	CD8.naive	-0.0106916	0.012314	0.385258	0.414248
384	FHS	DNAmLeptinAdjAge	CD8T	0.00692058	0.0511632	0.892474	0.0494045
1097	JHS	DNAmLeptinAdjAge	CD8T	0.117275	0.0300114	9.88973e-05	4.00482
791	InChianti	DNAmLeptinAdjAge	CD8T	-0.039147	0.0355737	0.271472	0.566274
384	BLSA	DNAmLeptinAdjAge	CD8T	0.100794	0.0509039	0.0484111	1.31505
401	LBC21	DNAmLeptinAdjAge	CD8T	0.0593257	0.0499744	0.235886	0.627298
1355	LBC36	DNAmLeptinAdjAge	CD8T	0.153751	0.0268631	1.28344e-08	7.89162
998	WHI BA23 White	DNAmLeptinAdjAge	CD8T	0.0163365	0.031682	0.60622	0.21737
676	WHI BA23 AfricanA	DNAmLeptinAdjAge	CD8T	-0.0173219	0.0385128	0.653021	0.185073
433	WHI BA23 Hispanic	DNAmLeptinAdjAge	CD8T	0.0377428	0.048134	0.433401	0.36311
6519	Meta	DNAmLeptinAdjAge	CD8T	0.0607807	0.0123498	8.58359e-07	6.06633
384	FHS	DNAmLeptinAdjAge	CD8.ex	0.0829417	0.0509882	0.104628	0.98035
1097	JHS	DNAmLeptinAdjAge	CD8.ex	-0.035548	0.0302008	0.239429	0.620824
791	InChianti	DNAmLeptinAdjAge	CD8.ex	-0.127891	0.0353086	0.000310925	3.50734
384	BLSA	DNAmLeptinAdjAge	CD8.ex	0.158003	0.0505218	0.00189867	2.72155
401	LBC21	DNAmLeptinAdjAge	CD8.ex	0.104521	0.0497884	0.0364177	1.43869
1355	LBC36	DNAmLeptinAdjAge	CD8.ex	0.0445491	0.0271594	0.101178	0.994913
998	WHI BA23 White	DNAmLeptinAdjAge	CD8.ex	0.0284176	0.0316734	0.369826	0.432003
676	WHI BA23 AfricanA	DNAmLeptinAdjAge	CD8.ex	-0.0140648	0.0385148	0.715091	0.145638
433	WHI BA23 Hispanic	DNAmLeptinAdjAge	CD8.ex	0.0539244	0.0480982	0.262856	0.580281
6519	Meta	DNAmLeptinAdjAge	CD8.ex	0.0148322	0.0123681	0.23044	0.637443
384	FHS	DNAmLeptinAdjAge	NK	0.0211273	0.051153	0.679822	0.167605
1097	JHS	DNAmLeptinAdjAge	NK	0.0363905	0.0301999	0.228468	0.641175
791	InChianti	DNAmLeptinAdjAge	NK	-0.00690677	0.0356001	0.846218	0.0725177
384	BLSA	DNAmLeptinAdjAge	NK	0.17315	0.0503916	0.000655016	3.18375
401	LBC21	DNAmLeptinAdjAge	NK	0.0605003	0.0499709	0.226723	0.644504
1355	LBC36	DNAmLeptinAdjAge	NK	0.0720211	0.0271158	0.00799884	2.09697
998	WHI BA23 White	DNAmLeptinAdjAge	NK	0.212511	0.0309625	1.17984e-11	10.9282
676	WHI BA23 AfricanA	DNAmLeptinAdjAge	NK	0.193328	0.0377919	4.08215e-07	6.38911
433	WHI BA23 Hispanic	DNAmLeptinAdjAge	NK	0.136722	0.047716	0.00436952	2.35957
6519	Meta	DNAmLeptinAdjAge	NK	0.0984147	0.012305	1.26501e-15	14.8979
384	FHS	DNAmLeptinAdjAge	PB	-0.0160485	0.0511579	0.753917	0.122677
1097	JHS	DNAmLeptinAdjAge	PB	-0.106058	0.0300495	0.00043371	3.3628
791	InChianti	DNAmLeptinAdjAge	PB	-0.0296774	0.0355853	0.404545	0.393033
384	BLSA	DNAmLeptinAdjAge	PB	-0.0594312	0.051074	0.2453	0.610302
401	LBC21	DNAmLeptinAdjAge	PB	0.145787	0.0495277	0.00343445	2.46414
1355	LBC36	DNAmLeptinAdjAge	PB	0.0182823	0.0271818	0.501321	0.299884
998	WHI BA23 White	DNAmLeptinAdjAge	PB	-0.0648712	0.0316195	0.0404675	1.39289
676	WHI BA23 AfricanA	DNAmLeptinAdjAge	PB	-0.124101	0.0382208	0.00122434	2.9121
433	WHI BA23 Hispanic	DNAmLeptinAdjAge	PB	0.0133995	0.048164	0.780989	0.107355
6519	Meta	DNAmLeptinAdjAge	PB	-0.0351233	0.0123659	0.00450667	2.34614
384	FHS	DNAmLeptinAdjAge	Mono	0.0985064	0.0509156	0.0537652	1.2695
1097	JHS	DNAmLeptinAdjAge	Mono	-0.0130235	0.0302173	0.666556	0.176163
791	InChianti	DNAmLeptinAdjAge	Mono	-0.0845538	0.0354735	0.0173808	1.75993
384	BLSA	DNAmLeptinAdjAge	Mono	-0.129175	0.0507358	0.0112877	1.9474
401	LBC21	DNAmLeptinAdjAge	Mono	-0.18142	0.0492319	0.000260267	3.58458
1355	LBC36	DNAmLeptinAdjAge	Mono	-0.0319551	0.0271725	0.239798	0.620155
998	WHI BA23 White	DNAmLeptinAdjAge	Mono	-0.0927997	0.0315495	0.00334291	2.47587
676	WHI BA23 AfricanA	DNAmLeptinAdjAge	Mono	-0.059079	0.0384513	0.124894	0.903458
433	WHI BA23 Hispanic	DNAmLeptinAdjAge	Mono	-0.0637165	0.0480704	0.185713	0.731157
6519	Meta	DNAmLeptinAdjAge	Mono	-0.0569204	0.0123609	4.12737e-06	5.38433
384	FHS	DNAmLeptinAdjAge	Gran	-0.0355471	0.0511321	0.487352	0.312157
1097	JHS	DNAmLeptinAdjAge	Gran	-0.147624	0.0298888	9.07016e-07	6.04239
791	InChianti	DNAmLeptinAdjAge	Gran	-0.012274	0.0355983	0.730342	0.136474
384	BLSA	DNAmLeptinAdjAge	Gran	-0.0895306	0.050959	0.0797332	1.09836
401	LBC21	DNAmLeptinAdjAge	Gran	0.0689746	0.0499434	0.168035	0.7746
1355	LBC36	DNAmLeptinAdjAge	Gran	-0.068589	0.0271223	0.0115558	1.9372
998	WHI BA23 White	DNAmLeptinAdjAge	Gran	-0.0994577	0.0315291	0.00165606	2.78092
676	WHI BA23 AfricanA	DNAmLeptinAdjAge	Gran	-0.162438	0.038007	2.19779e-05	4.65801
433	WHI BA23 Hispanic	DNAmLeptinAdjAge	Gran	-0.0305766	0.0481458	0.525711	0.279253
6519	Meta	DNAmLeptinAdjAge	Gran	-0.0783256	0.012341	2.19851e-10	9.65787
384	FHS	DNAmlogCRPAdjAge	Bcell	-0.180321	0.0503258	0.000383492	3.41624
1097	JHS	DNAmlogCRPAdjAge	Bcell	-0.270747	0.0290912	6.96328e-20	19.1572
791	InChianti	DNAmlogCRPAdjAge	Bcell	-0.206298	0.0348351	4.74146e-09	8.32409
384	BLSA	DNAmlogCRPAdjAge	Bcell	-0.267341	0.0493022	1.04436e-07	6.98115
401	LBC21	DNAmlogCRPAdjAge	Bcell	-0.217965	0.0488589	1.06181e-05	4.97395
1355	LBC36	DNAmlogCRPAdjAge	Bcell	-0.155385	0.0268562	8.95453e-09	8.04796
998	WHI BA23 White	DNAmlogCRPAdjAge	Bcell	-0.27615	0.0304541	6.31673e-19	18.1995
676	WHI BA23 AfricanA	DNAmlogCRPAdjAge	Bcell	-0.25128	0.0372827	3.40677e-11	10.4677
433	WHI BA23 Hispanic	DNAmlogCRPAdjAge	Bcell	-0.322678	0.0455917	5.98595e-12	11.2229
6519	Meta	DNAmlogCRPAdjAge	Bcell	-0.233701	0.012042	6.71621e-84	83.1729
384	FHS	DNAmlogCRPAdjAge	CD4T	-0.231878	0.04977	4.39495e-06	5.35705
1097	JHS	DNAmlogCRPAdjAge	CD4T	-0.313347	0.028698	2.03694e-26	25.691
791	InChianti	DNAmlogCRPAdjAge	CD4T	-0.304397	0.0339115	2.01993e-18	17.6947
384	BLSA	DNAmlogCRPAdjAge	CD4T	-0.326978	0.048352	5.10135e-11	10.2923
401	LBC21	DNAmlogCRPAdjAge	CD4T	-0.233798	0.0486751	2.21295e-06	5.65503
1355	LBC36	DNAmlogCRPAdjAge	CD4T	-0.268428	0.0261886	8.56086e-24	23.0675
998	WHI BA23 White	DNAmlogCRPAdjAge	CD4T	-0.32229	0.0299955	1.48349e-25	24.8287
676	WHI BA23 AfricanA	DNAmlogCRPAdjAge	CD4T	-0.364704	0.0358655	1.07714e-22	21.9677
433	WHI BA23 Hispanic	DNAmlogCRPAdjAge	CD4T	-0.449952	0.0430168	5.69425e-23	22.2446
6519	Meta	DNAmlogCRPAdjAge	CD4T	-0.311932	0.011765	6.77e-155	154.169
384	FHS	DNAmlogCRPAdjAge	CD4.naive	-0.14796	0.0506013	0.00366124	2.43637
1097	JHS	DNAmlogCRPAdjAge	CD4.naive	-0.186747	0.0296883	4.57294e-10	9.3398
791	InChianti	DNAmlogCRPAdjAge	CD4.naive	-0.141357	0.0352435	6.62425e-05	4.17886
384	BLSA	DNAmlogCRPAdjAge	CD4.naive	-0.214724	0.049971	2.19957e-05	4.65766
401	LBC21	DNAmlogCRPAdjAge	CD4.naive	0.0167049	0.0500556	0.738761	0.131496
1355	LBC36	DNAmlogCRPAdjAge	CD4.naive	-0.0884042	0.0270799	0.00112373	2.94934
998	WHI BA23 White	DNAmlogCRPAdjAge	CD4.naive	-0.276356	0.0304522	5.93706e-19	18.2264
676	WHI BA23 AfricanA	DNAmlogCRPAdjAge	CD4.naive	-0.295095	0.0368032	4.74944e-15	14.3234
433	WHI BA23 Hispanic	DNAmlogCRPAdjAge	CD4.naive	-0.351897	0.0450874	4.55902e-14	13.3411
6519	Meta	DNAmlogCRPAdjAge	CD4.naive	-0.187051	0.012125	1.07931e-53	52.9669
384	FHS	DNAmlogCRPAdjAge	CD8.naive	-0.16459	0.0504667	0.00120846	2.91777
1097	JHS	DNAmlogCRPAdjAge	CD8.naive	-0.206983	0.0295655	4.4289e-12	11.3537
791	InChianti	DNAmlogCRPAdjAge	CD8.naive	-0.195202	0.0349161	3.11878e-08	7.50601
384	BLSA	DNAmlogCRPAdjAge	CD8.naive	-0.221373	0.049895	1.1961e-05	4.92223
401	LBC21	DNAmlogCRPAdjAge	CD8.naive	0.0978269	0.0498225	0.0502812	1.29859
1355	LBC36	DNAmlogCRPAdjAge	CD8.naive	0.00761816	0.0271856	0.779345	0.10827
998	WHI BA23 White	DNAmlogCRPAdjAge	CD8.naive	-0.237952	0.0307761	2.58774e-14	13.5871
676	WHI BA23 AfricanA	DNAmlogCRPAdjAge	CD8.naive	-0.348016	0.0361107	1.11263e-20	19.9537
433	WHI BA23 Hispanic	DNAmlogCRPAdjAge	CD8.naive	-0.2449	0.0467015	2.46828e-07	6.60761
6519	Meta	DNAmlogCRPAdjAge	CD8.naive	-0.166449	0.0121306	7.56375e-43	42.1213
384	FHS	DNAmlogCRPAdjAge	CD8T	-0.24908	0.0495519	7.68685e-07	6.11425
1097	JHS	DNAmlogCRPAdjAge	CD8T	-0.240977	0.0293293	5.87714e-16	15.2308
791	InChianti	DNAmlogCRPAdjAge	CD8T	-0.0437197	0.0355669	0.219354	0.658855
384	BLSA	DNAmlogCRPAdjAge	CD8T	-0.179246	0.0503358	0.000416079	3.38082
401	LBC21	DNAmlogCRPAdjAge	CD8T	-0.0987846	0.0498178	0.0480617	1.3182
1355	LBC36	DNAmlogCRPAdjAge	CD8T	-0.0277139	0.0271759	0.308008	0.511438
998	WHI BA23 White	DNAmlogCRPAdjAge	CD8T	-0.192231	0.0310953	9.21988e-10	9.03527
676	WHI BA23 AfricanA	DNAmlogCRPAdjAge	CD8T	-0.280376	0.0369736	1.12154e-13	12.9502
433	WHI BA23 Hispanic	DNAmlogCRPAdjAge	CD8T	-0.221366	0.0469733	3.3058e-06	5.48072
6519	Meta	DNAmlogCRPAdjAge	CD8T	-0.158738	0.0121889	9.03547e-39	38.044
384	FHS	DNAmlogCRPAdjAge	CD8.ex	0.138478	0.0506715	0.00657067	2.18239
1097	JHS	DNAmlogCRPAdjAge	CD8.ex	0.119713	0.0300026	7.04441e-05	4.15216
791	InChianti	DNAmlogCRPAdjAge	CD8.ex	0.111052	0.0353807	0.00175978	2.75454
384	BLSA	DNAmlogCRPAdjAge	CD8.ex	0.165691	0.0504572	0.00111871	2.95128
401	LBC21	DNAmlogCRPAdjAge	CD8.ex	0.00571614	0.0500618	0.909151	0.0413639
1355	LBC36	DNAmlogCRPAdjAge	CD8.ex	0.100015	0.02705	0.000226511	3.64491
998	WHI BA23 White	DNAmlogCRPAdjAge	CD8.ex	0.15588	0.0312989	7.47799e-07	6.12621
676	WHI BA23 AfricanA	DNAmlogCRPAdjAge	CD8.ex	0.24954	0.0373	4.69172e-11	10.3287
433	WHI BA23 Hispanic	DNAmlogCRPAdjAge	CD8.ex	0.19507	0.047243	4.37465e-05	4.35906
6519	Meta	DNAmlogCRPAdjAge	CD8.ex	0.136272	0.0122671	1.13785e-28	27.9439
384	FHS	DNAmlogCRPAdjAge	NK	-0.231543	0.049774	4.5407e-06	5.34288
1097	JHS	DNAmlogCRPAdjAge	NK	-0.121417	0.0299963	5.53544e-05	4.25685
791	InChianti	DNAmlogCRPAdjAge	NK	-0.270214	0.0342766	1.05907e-14	13.9751
384	BLSA	DNAmlogCRPAdjAge	NK	-0.145424	0.0506205	0.00429524	2.36701
401	LBC21	DNAmlogCRPAdjAge	NK	-0.241736	0.0485779	9.65741e-07	6.01514
1355	LBC36	DNAmlogCRPAdjAge	NK	-0.197668	0.0266499	2.103e-13	12.6772
998	WHI BA23 White	DNAmlogCRPAdjAge	NK	-0.177509	0.031183	1.64631e-08	7.78349
676	WHI BA23 AfricanA	DNAmlogCRPAdjAge	NK	-0.146169	0.0381049	0.000136808	3.86389
433	WHI BA23 Hispanic	DNAmlogCRPAdjAge	NK	-0.173967	0.0474338	0.000275473	3.55992
6519	Meta	DNAmlogCRPAdjAge	NK	-0.186146	0.0121718	8.48708e-53	52.0712
384	FHS	DNAmlogCRPAdjAge	PB	0.324992	0.0483871	6.76684e-11	10.1696
1097	JHS	DNAmlogCRPAdjAge	PB	0.312397	0.0287074	2.93107e-26	25.533
791	InChianti	DNAmlogCRPAdjAge	PB	0.2665	0.0343134	2.50468e-14	13.6012
384	BLSA	DNAmlogCRPAdjAge	PB	0.314459	0.0485689	2.9265e-10	9.53365
401	LBC21	DNAmlogCRPAdjAge	PB	0.295603	0.0478254	1.57605e-09	8.80243
1355	LBC36	DNAmlogCRPAdjAge	PB	0.284338	0.0260642	1.28897e-26	25.8898
998	WHI BA23 White	DNAmlogCRPAdjAge	PB	0.371046	0.0294243	6.23366e-34	33.2053
676	WHI BA23 AfricanA	DNAmlogCRPAdjAge	PB	0.387961	0.0355016	1.04902e-25	24.9792
433	WHI BA23 Hispanic	DNAmlogCRPAdjAge	PB	0.385247	0.0444504	9.06288e-17	16.0427
6519	Meta	DNAmlogCRPAdjAge	PB	0.323828	0.0117222	5.52797e-168	167.257
384	FHS	DNAmlogCRPAdjAge	Mono	0.131188	0.0507223	0.0100675	1.99708
1097	JHS	DNAmlogCRPAdjAge	Mono	0.191516	0.0296605	1.60274e-10	9.79514
791	InChianti	DNAmlogCRPAdjAge	Mono	0.120446	0.0353418	0.000687505	3.16272
384	BLSA	DNAmlogCRPAdjAge	Mono	0.201726	0.0501126	6.85883e-05	4.16375
401	LBC21	DNAmlogCRPAdjAge	Mono	-0.031955	0.0500371	0.523433	0.281139
1355	LBC36	DNAmlogCRPAdjAge	Mono	-0.0419173	0.0271625	0.123015	0.910043
998	WHI BA23 White	DNAmlogCRPAdjAge	Mono	0.0489437	0.0316482	0.122304	0.91256
676	WHI BA23 AfricanA	DNAmlogCRPAdjAge	Mono	0.188303	0.0378295	8.18114e-07	6.08719
433	WHI BA23 Hispanic	DNAmlogCRPAdjAge	Mono	0.145455	0.047656	0.00241229	2.61757
6519	Meta	DNAmlogCRPAdjAge	Mono	0.0937601	0.0122938	2.41005e-14	13.618
384	FHS	DNAmlogCRPAdjAge	Gran	0.367683	0.0475804	9.77155e-14	13.01
1097	JHS	DNAmlogCRPAdjAge	Gran	0.398157	0.0277212	5.48201e-43	42.2611
791	InChianti	DNAmlogCRPAdjAge	Gran	0.373646	0.0330224	1.30195e-27	26.8854
384	BLSA	DNAmlogCRPAdjAge	Gran	0.399435	0.0469056	3.84906e-16	15.4146
401	LBC21	DNAmlogCRPAdjAge	Gran	0.385339	0.0461965	1.20944e-15	14.9174
1355	LBC36	DNAmlogCRPAdjAge	Gran	0.327558	0.0256865	2.96878e-35	34.5274
998	WHI BA23 White	DNAmlogCRPAdjAge	Gran	0.440037	0.0284536	1.62477e-48	47.7892
676	WHI BA23 AfricanA	DNAmlogCRPAdjAge	Gran	0.444935	0.0344958	3.5434e-34	33.4506
433	WHI BA23 Hispanic	DNAmlogCRPAdjAge	Gran	0.495341	0.0418437	3.45987e-28	27.4609
6519	Meta	DNAmlogCRPAdjAge	Gran	0.397922	0.0113626	1.1035e-268	267.957
384	FHS	DNAmlogA1CAdjAge	Bcell	-0.167849	0.0504386	0.000960333	3.01758
1097	JHS	DNAmlogA1CAdjAge	Bcell	-0.0936341	0.0300871	0.00190575	2.71993
791	InChianti	DNAmlogA1CAdjAge	Bcell	0.0304088	0.0355845	0.393058	0.405543
384	BLSA	DNAmlogA1CAdjAge	Bcell	0.0252837	0.0511481	0.621362	0.206655
401	LBC21	DNAmlogA1CAdjAge	Bcell	-0.0911926	0.049854	0.068117	1.16674
1355	LBC36	DNAmlogA1CAdjAge	Bcell	-0.0816578	0.0270956	0.00262887	2.58023
998	WHI BA23 White	DNAmlogA1CAdjAge	Bcell	-0.165038	0.0312517	1.57829e-07	6.80181
676	WHI BA23 AfricanA	DNAmlogA1CAdjAge	Bcell	-0.183162	0.0378669	1.63485e-06	5.78652
433	WHI BA23 Hispanic	DNAmlogA1CAdjAge	Bcell	-0.146214	0.0476506	0.00228744	2.64065
6519	Meta	DNAmlogA1CAdjAge	Bcell	-0.0977523	0.012313	2.03905e-15	14.6906
384	FHS	DNAmlogA1CAdjAge	CD4T	0.0453606	0.0511118	0.37538	0.425529
1097	JHS	DNAmlogA1CAdjAge	CD4T	-0.0528181	0.0301777	0.0803579	1.09497
791	InChianti	DNAmlogA1CAdjAge	CD4T	0.0392453	0.0355735	0.27027	0.568202
384	BLSA	DNAmlogA1CAdjAge	CD4T	0.0546236	0.0510881	0.285653	0.544162
401	LBC21	DNAmlogA1CAdjAge	CD4T	-0.0613464	0.0499683	0.220281	0.657023
1355	LBC36	DNAmlogA1CAdjAge	CD4T	-0.0436994	0.0271604	0.107863	0.967127
998	WHI BA23 White	DNAmlogA1CAdjAge	CD4T	0.0143302	0.031683	0.651151	0.186318
676	WHI BA23 AfricanA	DNAmlogA1CAdjAge	CD4T	-0.0940835	0.0383477	0.0144022	1.84157
433	WHI BA23 Hispanic	DNAmlogA1CAdjAge	CD4T	-0.168569	0.047479	0.00042702	3.36955
6519	Meta	DNAmlogA1CAdjAge	CD4T	-0.0301651	0.0123748	0.0147844	1.8302
384	FHS	DNAmlogA1CAdjAge	CD4.naive	0.0481065	0.0511052	0.347135	0.459502
1097	JHS	DNAmlogA1CAdjAge	CD4.naive	-0.0247666	0.0302106	0.412509	0.384566
791	InChianti	DNAmlogA1CAdjAge	CD4.naive	0.0242047	0.0355905	0.496648	0.303951
384	BLSA	DNAmlogA1CAdjAge	CD4.naive	-0.03121	0.0511395	0.542032	0.265975
401	LBC21	DNAmlogA1CAdjAge	CD4.naive	0.0418043	0.0500189	0.403785	0.39385
1355	LBC36	DNAmlogA1CAdjAge	CD4.naive	-0.0714924	0.0271168	0.00847339	2.07194
998	WHI BA23 White	DNAmlogA1CAdjAge	CD4.naive	0.0103398	0.0316845	0.744239	0.128287
676	WHI BA23 AfricanA	DNAmlogA1CAdjAge	CD4.naive	-0.0934036	0.0383502	0.0151276	1.82023
433	WHI BA23 Hispanic	DNAmlogA1CAdjAge	CD4.naive	-0.129248	0.0477643	0.0070811	2.1499
6519	Meta	DNAmlogA1CAdjAge	CD4.naive	-0.0294157	0.0123803	0.0175006	1.75695
384	FHS	DNAmlogA1CAdjAge	CD8.naive	-0.0363365	0.0511307	0.477728	0.320819
1097	JHS	DNAmlogA1CAdjAge	CD8.naive	-0.107669	0.0300442	0.000353675	3.4514
791	InChianti	DNAmlogA1CAdjAge	CD8.naive	-0.0998891	0.0354229	0.00492429	2.30766
384	BLSA	DNAmlogA1CAdjAge	CD8.naive	-0.0428765	0.0511174	0.402114	0.395651
401	LBC21	DNAmlogA1CAdjAge	CD8.naive	0.102111	0.0498009	0.0409803	1.38742
1355	LBC36	DNAmlogA1CAdjAge	CD8.naive	-0.0381924	0.0271665	0.159994	0.795896
998	WHI BA23 White	DNAmlogA1CAdjAge	CD8.naive	-0.140945	0.0313699	7.84477e-06	5.10542
676	WHI BA23 AfricanA	DNAmlogA1CAdjAge	CD8.naive	-0.248888	0.0373065	5.28566e-11	10.2769
433	WHI BA23 Hispanic	DNAmlogA1CAdjAge	CD8.naive	-0.221935	0.0469671	3.11497e-06	5.50655
6519	Meta	DNAmlogA1CAdjAge	CD8.naive	-0.100124	0.0122941	3.8225e-16	15.4177
384	FHS	DNAmlogA1CAdjAge	CD8T	-0.0861554	0.0509742	0.0918102	1.03711
1097	JHS	DNAmlogA1CAdjAge	CD8T	-0.0231242	0.0302118	0.444196	0.352425
791	InChianti	DNAmlogA1CAdjAge	CD8T	0.122648	0.0353322	0.000546152	3.26269
384	BLSA	DNAmlogA1CAdjAge	CD8T	0.0727575	0.0510288	0.15474	0.810399
401	LBC21	DNAmlogA1CAdjAge	CD8T	-0.00802392	0.050061	0.872739	0.0591154
1355	LBC36	DNAmlogA1CAdjAge	CD8T	0.0352916	0.0271694	0.194185	0.711785
998	WHI BA23 White	DNAmlogA1CAdjAge	CD8T	-0.0437816	0.0316558	0.166959	0.77739
676	WHI BA23 AfricanA	DNAmlogA1CAdjAge	CD8T	0.0291706	0.0385022	0.448935	0.347817
433	WHI BA23 Hispanic	DNAmlogA1CAdjAge	CD8T	0.0617704	0.0480763	0.199538	0.699974
6519	Meta	DNAmlogA1CAdjAge	CD8T	0.0176286	0.0123803	0.154467	0.811164
384	FHS	DNAmlogA1CAdjAge	CD8.ex	0.0548821	0.0510873	0.283375	0.547638
1097	JHS	DNAmlogA1CAdjAge	CD8.ex	0.0395314	0.0301963	0.190759	0.719515
791	InChianti	DNAmlogA1CAdjAge	CD8.ex	-0.0542914	0.0355484	0.127099	0.895858
384	BLSA	DNAmlogA1CAdjAge	CD8.ex	-0.0697619	0.0510398	0.172487	0.763243
401	LBC21	DNAmlogA1CAdjAge	CD8.ex	0.072776	0.0499299	0.145747	0.8364
1355	LBC36	DNAmlogA1CAdjAge	CD8.ex	0.0693537	0.0271209	0.01066	1.97224
998	WHI BA23 White	DNAmlogA1CAdjAge	CD8.ex	0.0293672	0.0316725	0.354041	0.450947
676	WHI BA23 AfricanA	DNAmlogA1CAdjAge	CD8.ex	0.127987	0.0382018	0.0008523	3.06941
433	WHI BA23 Hispanic	DNAmlogA1CAdjAge	CD8.ex	0.0666755	0.0480611	0.166065	0.779721
6519	Meta	DNAmlogA1CAdjAge	CD8.ex	0.0404185	0.0123742	0.00108949	2.96278
384	FHS	DNAmlogA1CAdjAge	NK	-0.0308844	0.05114	0.546257	0.262603
1097	JHS	DNAmlogA1CAdjAge	NK	0.0107955	0.0302181	0.720972	0.142082
791	InChianti	DNAmlogA1CAdjAge	NK	-0.07119	0.0355106	0.0453306	1.34361
384	BLSA	DNAmlogA1CAdjAge	NK	0.0767536	0.0510135	0.13326	0.8753
401	LBC21	DNAmlogA1CAdjAge	NK	0.030157	0.0500398	0.547077	0.261952
1355	LBC36	DNAmlogA1CAdjAge	NK	-0.00188472	0.0271863	0.94474	0.0246875
998	WHI BA23 White	DNAmlogA1CAdjAge	NK	-0.0666202	0.0316158	0.0353515	1.45159
676	WHI BA23 AfricanA	DNAmlogA1CAdjAge	NK	0.0271059	0.0385044	0.481696	0.317227
433	WHI BA23 Hispanic	DNAmlogA1CAdjAge	NK	-0.114654	0.0478507	0.0169965	1.76964
6519	Meta	DNAmlogA1CAdjAge	NK	-0.0177786	0.0123856	0.151164	0.820551
384	FHS	DNAmlogA1CAdjAge	PB	0.0853629	0.0509777	0.094848	1.02297
1097	JHS	DNAmlogA1CAdjAge	PB	0.0771136	0.0301299	0.0106197	1.97389
791	InChianti	DNAmlogA1CAdjAge	PB	0.000697107	0.0356009	0.984382	0.00683614
384	BLSA	DNAmlogA1CAdjAge	PB	-0.0758429	0.0510171	0.137941	0.860307
401	LBC21	DNAmlogA1CAdjAge	PB	0.10125	0.0498053	0.0427229	1.36934
1355	LBC36	DNAmlogA1CAdjAge	PB	0.0672072	0.0271249	0.0133448	1.87469
998	WHI BA23 White	DNAmlogA1CAdjAge	PB	0.0604818	0.0316282	0.0561277	1.25082
676	WHI BA23 AfricanA	DNAmlogA1CAdjAge	PB	0.0548454	0.0384606	0.154327	0.811558
433	WHI BA23 Hispanic	DNAmlogA1CAdjAge	PB	0.126623	0.0477806	0.00834297	2.07868
6519	Meta	DNAmlogA1CAdjAge	PB	0.0572815	0.0123697	3.64267e-06	5.43858
384	FHS	DNAmlogA1CAdjAge	Mono	-0.00888418	0.0511624	0.862235	0.0643742
1097	JHS	DNAmlogA1CAdjAge	Mono	0.0118475	0.0302178	0.695082	0.157964
791	InChianti	DNAmlogA1CAdjAge	Mono	-0.0693387	0.0355153	0.0512483	1.29032
384	BLSA	DNAmlogA1CAdjAge	Mono	-0.000356223	0.0511644	0.994449	0.00241768
401	LBC21	DNAmlogA1CAdjAge	Mono	-0.145062	0.0495331	0.0036004	2.44365
1355	LBC36	DNAmlogA1CAdjAge	Mono	-0.0669739	0.0271253	0.0136698	1.86424
998	WHI BA23 White	DNAmlogA1CAdjAge	Mono	-0.0185444	0.0316808	0.558443	0.253021
676	WHI BA23 AfricanA	DNAmlogA1CAdjAge	Mono	-0.0011343	0.0385185	0.976516	0.0103207
433	WHI BA23 Hispanic	DNAmlogA1CAdjAge	Mono	-0.00243071	0.0481682	0.959777	0.0178297
6519	Meta	DNAmlogA1CAdjAge	Mono	-0.0331233	0.0123844	0.007482	2.12598
384	FHS	DNAmlogA1CAdjAge	Gran	0.0996896	0.0509096	0.0509375	1.29296
1097	JHS	DNAmlogA1CAdjAge	Gran	0.0873243	0.0301045	0.00379762	2.42049
791	InChianti	DNAmlogA1CAdjAge	Gran	-0.0126473	0.0355981	0.722474	0.141178
384	BLSA	DNAmlogA1CAdjAge	Gran	-0.0686008	0.0510439	0.17976	0.745306
401	LBC21	DNAmlogA1CAdjAge	Gran	0.11103	0.0497531	0.0261951	1.58178
1355	LBC36	DNAmlogA1CAdjAge	Gran	0.0365312	0.0271682	0.17897	0.747219
998	WHI BA23 White	DNAmlogA1CAdjAge	Gran	0.0764378	0.0315935	0.0157238	1.80344
676	WHI BA23 AfricanA	DNAmlogA1CAdjAge	Gran	0.0703133	0.0384232	0.0676963	1.16944
433	WHI BA23 Hispanic	DNAmlogA1CAdjAge	Gran	0.162326	0.0475295	0.00069755	3.15642
6519	Meta	DNAmlogA1CAdjAge	Gran	0.0594417	0.0123628	1.52364e-06	5.81712
384	FHS	DNAmPAI1AdjAge	Bcell	-0.257928	0.0494333	2.97822e-07	6.52604
1097	JHS	DNAmPAI1AdjAge	Bcell	-0.143531	0.029907	1.81319e-06	5.74156
791	InChianti	DNAmPAI1AdjAge	Bcell	-0.031669	0.0355831	0.373736	0.427435
384	BLSA	DNAmPAI1AdjAge	Bcell	-0.114498	0.050828	0.0248481	1.60471
401	LBC21	DNAmPAI1AdjAge	Bcell	-0.110572	0.0497556	0.0268233	1.57149
1355	LBC36	DNAmPAI1AdjAge	Bcell	-0.1284	0.0269613	2.11891e-06	5.67389
998	WHI BA23 White	DNAmPAI1AdjAge	Bcell	-0.0517243	0.0316438	0.102453	0.989474
676	WHI BA23 AfricanA	DNAmPAI1AdjAge	Bcell	-0.0503266	0.0384698	0.191247	0.718405
433	WHI BA23 Hispanic	DNAmPAI1AdjAge	Bcell	-0.0328319	0.0481423	0.495621	0.30485
6519	Meta	DNAmPAI1AdjAge	Bcell	-0.0996243	0.0123189	6.10857e-16	15.2141
384	FHS	DNAmPAI1AdjAge	CD4T	0.043772	0.0511154	0.392348	0.406328
1097	JHS	DNAmPAI1AdjAge	CD4T	-0.0876417	0.0301036	0.00367182	2.43512
791	InChianti	DNAmPAI1AdjAge	CD4T	-0.0508178	0.0355549	0.153321	0.814399
384	BLSA	DNAmPAI1AdjAge	CD4T	0.0197004	0.0511545	0.700367	0.154675
401	LBC21	DNAmPAI1AdjAge	CD4T	-0.0697104	0.0499408	0.163533	0.786395
1355	LBC36	DNAmPAI1AdjAge	CD4T	-0.032905	0.0271716	0.226105	0.645689
998	WHI BA23 White	DNAmPAI1AdjAge	CD4T	-0.0634177	0.0316224	0.0451834	1.34502
676	WHI BA23 AfricanA	DNAmPAI1AdjAge	CD4T	-0.115218	0.038262	0.00269872	2.56884
433	WHI BA23 Hispanic	DNAmPAI1AdjAge	CD4T	-0.0905269	0.0479705	0.0598139	1.2232
6519	Meta	DNAmPAI1AdjAge	CD4T	-0.0561208	0.0123726	5.73612e-06	5.24138
384	FHS	DNAmPAI1AdjAge	CD4.naive	0.103304	0.0508907	0.0430571	1.36596
1097	JHS	DNAmPAI1AdjAge	CD4.naive	-0.0245632	0.0302108	0.416359	0.380532
791	InChianti	DNAmPAI1AdjAge	CD4.naive	0.0543838	0.0355483	0.126452	0.898073
384	BLSA	DNAmPAI1AdjAge	CD4.naive	-0.00901677	0.0511624	0.8602	0.0654005
401	LBC21	DNAmPAI1AdjAge	CD4.naive	0.0314531	0.0500378	0.52998	0.275741
1355	LBC36	DNAmPAI1AdjAge	CD4.naive	0.034694	0.02717	0.201848	0.694975
998	WHI BA23 White	DNAmPAI1AdjAge	CD4.naive	-0.0590099	0.031631	0.062395	1.20485
676	WHI BA23 AfricanA	DNAmPAI1AdjAge	CD4.naive	-0.0903274	0.0383611	0.0188254	1.72525
433	WHI BA23 Hispanic	DNAmPAI1AdjAge	CD4.naive	-0.0763916	0.0480276	0.112438	0.949089
6519	Meta	DNAmPAI1AdjAge	CD4.naive	-0.00634076	0.0123828	0.608608	0.215663
384	FHS	DNAmPAI1AdjAge	CD8.naive	0.052255	0.0510945	0.307091	0.512732
1097	JHS	DNAmPAI1AdjAge	CD8.naive	-0.0704631	0.0301448	0.0195931	1.7079
791	InChianti	DNAmPAI1AdjAge	CD8.naive	-0.013163	0.0355979	0.711653	0.147732
384	BLSA	DNAmPAI1AdjAge	CD8.naive	-0.0718461	0.0510322	0.159986	0.795917
401	LBC21	DNAmPAI1AdjAge	CD8.naive	-0.014277	0.0500575	0.77563	0.110346
1355	LBC36	DNAmPAI1AdjAge	CD8.naive	-0.0260228	0.0271772	0.338474	0.470474
998	WHI BA23 White	DNAmPAI1AdjAge	CD8.naive	-0.0724741	0.0316029	0.0220397	1.65679
676	WHI BA23 AfricanA	DNAmPAI1AdjAge	CD8.naive	-0.176468	0.0379141	3.91319e-06	5.40747
433	WHI BA23 Hispanic	DNAmPAI1AdjAge	CD8.naive	-0.0334025	0.0481414	0.488155	0.311442
6519	Meta	DNAmPAI1AdjAge	CD8.naive	-0.0529474	0.0123673	1.85869e-05	4.73079
384	FHS	DNAmPAI1AdjAge	CD8T	-0.0882624	0.0509648	0.0841107	1.07515
1097	JHS	DNAmPAI1AdjAge	CD8T	-0.0670236	0.0301519	0.0264287	1.57792
791	InChianti	DNAmPAI1AdjAge	CD8T	-0.139641	0.0352521	8.13168e-05	4.08982
384	BLSA	DNAmPAI1AdjAge	CD8T	-0.118806	0.0508021	0.0198711	1.70178
401	LBC21	DNAmPAI1AdjAge	CD8T	-0.104779	0.0497871	0.0359566	1.44422
1355	LBC36	DNAmPAI1AdjAge	CD8T	-0.0247204	0.0271781	0.36321	0.439843
998	WHI BA23 White	DNAmPAI1AdjAge	CD8T	-0.0852887	0.0315708	0.00701977	2.15368
676	WHI BA23 AfricanA	DNAmPAI1AdjAge	CD8T	-0.0974577	0.0383352	0.0112368	1.94936
433	WHI BA23 Hispanic	DNAmPAI1AdjAge	CD8T	-0.0859428	0.0479901	0.0740197	1.13065
6519	Meta	DNAmPAI1AdjAge	CD8T	-0.081047	0.0123538	5.3641e-11	10.2705
384	FHS	DNAmPAI1AdjAge	CD8.ex	0.107454	0.0508682	0.0353001	1.45222
1097	JHS	DNAmPAI1AdjAge	CD8.ex	0.0670816	0.0301518	0.0262983	1.58007
791	InChianti	DNAmPAI1AdjAge	CD8.ex	0.0546953	0.0355477	0.124291	0.90556
384	BLSA	DNAmPAI1AdjAge	CD8.ex	0.031304	0.0511394	0.540816	0.266951
401	LBC21	DNAmPAI1AdjAge	CD8.ex	0.0796569	0.0499035	0.111232	0.95377
1355	LBC36	DNAmPAI1AdjAge	CD8.ex	0.0980138	0.0270555	0.000302332	3.51952
998	WHI BA23 White	DNAmPAI1AdjAge	CD8.ex	0.0427204	0.0316573	0.177495	0.750815
676	WHI BA23 AfricanA	DNAmPAI1AdjAge	CD8.ex	0.139389	0.0381425	0.000277788	3.55629
433	WHI BA23 Hispanic	DNAmPAI1AdjAge	CD8.ex	0.0440743	0.0481215	0.360234	0.443416
6519	Meta	DNAmPAI1AdjAge	CD8.ex	0.0754675	0.0123609	1.02586e-09	8.98891
384	FHS	DNAmPAI1AdjAge	NK	-0.0813014	0.0509951	0.111696	0.951961
1097	JHS	DNAmPAI1AdjAge	NK	-0.0201653	0.0302137	0.504643	0.297016
791	InChianti	DNAmPAI1AdjAge	NK	-0.127093	0.0353122	0.000339229	3.46951
384	BLSA	DNAmPAI1AdjAge	NK	-0.0732151	0.0510271	0.152154	0.817715
401	LBC21	DNAmPAI1AdjAge	NK	-0.101609	0.0498035	0.0419893	1.37686
1355	LBC36	DNAmPAI1AdjAge	NK	-0.0293022	0.0271747	0.281097	0.551144
998	WHI BA23 White	DNAmPAI1AdjAge	NK	-0.0159314	0.0316822	0.615181	0.210997
676	WHI BA23 AfricanA	DNAmPAI1AdjAge	NK	0.0319369	0.0384989	0.407085	0.390315
433	WHI BA23 Hispanic	DNAmPAI1AdjAge	NK	-0.0461982	0.0481169	0.33753	0.471687
6519	Meta	DNAmPAI1AdjAge	NK	-0.0426464	0.0123786	0.000570679	3.24361
384	FHS	DNAmPAI1AdjAge	PB	0.149314	0.0505909	0.00335858	2.47384
1097	JHS	DNAmPAI1AdjAge	PB	0.112738	0.0300272	0.000182805	3.73801
791	InChianti	DNAmPAI1AdjAge	PB	0.0719069	0.0355088	0.0431989	1.36453
384	BLSA	DNAmPAI1AdjAge	PB	0.104288	0.0508855	0.0410993	1.38617
401	LBC21	DNAmPAI1AdjAge	PB	0.126188	0.0496624	0.0114344	1.94179
1355	LBC36	DNAmPAI1AdjAge	PB	0.102461	0.0270433	0.000158034	3.80125
998	WHI BA23 White	DNAmPAI1AdjAge	PB	0.161974	0.0312678	2.68201e-07	6.57154
676	WHI BA23 AfricanA	DNAmPAI1AdjAge	PB	0.144441	0.0381146	0.000164359	3.78421
433	WHI BA23 Hispanic	DNAmPAI1AdjAge	PB	0.200054	0.0471946	2.74936e-05	4.56077
6519	Meta	DNAmPAI1AdjAge	PB	0.125053	0.0122979	2.7359e-24	23.5629
384	FHS	DNAmPAI1AdjAge	Mono	0.0652348	0.0510555	0.202123	0.694385
1097	JHS	DNAmPAI1AdjAge	Mono	0.0552744	0.0301737	0.067242	1.17236
791	InChianti	DNAmPAI1AdjAge	Mono	0.0429178	0.0355681	0.227934	0.642192
384	BLSA	DNAmPAI1AdjAge	Mono	0.0819669	0.0509923	0.108785	0.963432
401	LBC21	DNAmPAI1AdjAge	Mono	-0.0444026	0.0500132	0.375174	0.425767
1355	LBC36	DNAmPAI1AdjAge	Mono	0.0242167	0.0271784	0.373073	0.428206
998	WHI BA23 White	DNAmPAI1AdjAge	Mono	-0.0760154	0.0315945	0.0163111	1.78752
676	WHI BA23 AfricanA	DNAmPAI1AdjAge	Mono	0.00297905	0.0385184	0.938375	0.0276234
433	WHI BA23 Hispanic	DNAmPAI1AdjAge	Mono	-0.00773393	0.0481669	0.872511	0.0592291
6519	Meta	DNAmPAI1AdjAge	Mono	0.0136159	0.0123869	0.271672	0.565955
384	FHS	DNAmPAI1AdjAge	Gran	0.160834	0.0504984	0.00156673	2.80501
1097	JHS	DNAmPAI1AdjAge	Gran	0.129067	0.0299671	1.80365e-05	4.74385
791	InChianti	DNAmPAI1AdjAge	Gran	0.155008	0.0351706	1.19146e-05	4.92392
384	BLSA	DNAmPAI1AdjAge	Gran	0.101863	0.0508983	0.0460657	1.33662
401	LBC21	DNAmPAI1AdjAge	Gran	0.162822	0.0493946	0.00106714	2.97178
1355	LBC36	DNAmPAI1AdjAge	Gran	0.106434	0.0270319	8.65781e-05	4.06259
998	WHI BA23 White	DNAmPAI1AdjAge	Gran	0.186335	0.0311313	3.00774e-09	8.52176
676	WHI BA23 AfricanA	DNAmPAI1AdjAge	Gran	0.167061	0.0379772	1.26391e-05	4.89828
433	WHI BA23 Hispanic	DNAmPAI1AdjAge	Gran	0.188429	0.0473055	7.97969e-05	4.09801
6519	Meta	DNAmPAI1AdjAge	Gran	0.146772	0.0122623	5.13928e-33	32.2891
384	FHS	DNAmTIMP1AdjAge	Bcell	-0.406146	0.0467545	1.10417e-16	15.957
1097	JHS	DNAmTIMP1AdjAge	Bcell	-0.183517	0.0297067	9.1591e-10	9.03815
791	InChianti	DNAmTIMP1AdjAge	Bcell	-0.345143	0.0334133	1.51443e-23	22.8197
384	BLSA	DNAmTIMP1AdjAge	Bcell	-0.164125	0.0504706	0.00124833	2.90367
401	LBC21	DNAmTIMP1AdjAge	Bcell	-0.173487	0.0493035	0.00048352	3.31559
1355	LBC36	DNAmTIMP1AdjAge	Bcell	-0.307651	0.0258678	4.28357e-31	30.3682
998	WHI BA23 White	DNAmTIMP1AdjAge	Bcell	-0.280025	0.0304185	1.94707e-19	18.7106
676	WHI BA23 AfricanA	DNAmTIMP1AdjAge	Bcell	-0.151648	0.0380731	7.54324e-05	4.12244
433	WHI BA23 Hispanic	DNAmTIMP1AdjAge	Bcell	-0.324262	0.0455656	4.65581e-12	11.332
6519	Meta	DNAmTIMP1AdjAge	Bcell	-0.264587	0.0119208	3.80932e-109	108.419
384	FHS	DNAmTIMP1AdjAge	CD4T	-0.326002	0.0483693	5.86277e-11	10.2319
1097	JHS	DNAmTIMP1AdjAge	CD4T	-0.218953	0.0294866	2.25336e-13	12.6472
791	InChianti	DNAmTIMP1AdjAge	CD4T	-0.404044	0.0325656	2.03159e-32	31.6922
384	BLSA	DNAmTIMP1AdjAge	CD4T	-0.269557	0.0492706	8.11248e-08	7.09085
401	LBC21	DNAmTIMP1AdjAge	CD4T	-0.214017	0.0489027	1.54276e-05	4.8117
1355	LBC36	DNAmTIMP1AdjAge	CD4T	-0.247465	0.0263408	2.35171e-20	19.6286
998	WHI BA23 White	DNAmTIMP1AdjAge	CD4T	-0.286657	0.0303564	2.48694e-20	19.6043
676	WHI BA23 AfricanA	DNAmTIMP1AdjAge	CD4T	-0.242644	0.0373675	1.62837e-10	9.78825
433	WHI BA23 Hispanic	DNAmTIMP1AdjAge	CD4T	-0.437746	0.043308	1.07156e-21	20.97
6519	Meta	DNAmTIMP1AdjAge	CD4T	-0.287326	0.0118459	5.80036e-130	129.237
384	FHS	DNAmTIMP1AdjAge	CD4.naive	-0.0744968	0.0510223	0.145089	0.838366
1097	JHS	DNAmTIMP1AdjAge	CD4.naive	-0.0880426	0.0301025	0.00351831	2.45367
791	InChianti	DNAmTIMP1AdjAge	CD4.naive	-0.13208	0.035289	0.000195173	3.70958
384	BLSA	DNAmTIMP1AdjAge	CD4.naive	-0.189713	0.0502353	0.000184394	3.73425
401	LBC21	DNAmTIMP1AdjAge	CD4.naive	0.0406248	0.0500213	0.41719	0.379666
1355	LBC36	DNAmTIMP1AdjAge	CD4.naive	0.0659844	0.0271271	0.0151275	1.82023
998	WHI BA23 White	DNAmTIMP1AdjAge	CD4.naive	-0.144402	0.0313541	4.64672e-06	5.33285
676	WHI BA23 AfricanA	DNAmTIMP1AdjAge	CD4.naive	-0.100704	0.0383228	0.00879006	2.05601
433	WHI BA23 Hispanic	DNAmTIMP1AdjAge	CD4.naive	-0.247858	0.0466653	1.74689e-07	6.75773
6519	Meta	DNAmTIMP1AdjAge	CD4.naive	-0.0803269	0.0123065	6.70104e-11	10.1739
384	FHS	DNAmTIMP1AdjAge	CD8.naive	-0.0303231	0.0511409	0.553577	0.256822
1097	JHS	DNAmTIMP1AdjAge	CD8.naive	-0.0709075	0.0301438	0.0188337	1.72506
791	InChianti	DNAmTIMP1AdjAge	CD8.naive	0.00422825	0.0356006	0.905489	0.043117
384	BLSA	DNAmTIMP1AdjAge	CD8.naive	-0.0731234	0.0510275	0.15267	0.816246
401	LBC21	DNAmTIMP1AdjAge	CD8.naive	-0.0425482	0.0500173	0.395463	0.402895
1355	LBC36	DNAmTIMP1AdjAge	CD8.naive	0.0597175	0.0271378	0.0279381	1.5538
998	WHI BA23 White	DNAmTIMP1AdjAge	CD8.naive	-0.185451	0.0311366	3.57936e-09	8.4462
676	WHI BA23 AfricanA	DNAmTIMP1AdjAge	CD8.naive	-0.145241	0.0381101	0.000151021	3.82096
433	WHI BA23 Hispanic	DNAmTIMP1AdjAge	CD8.naive	-0.189165	0.0472986	7.47252e-05	4.12653
6519	Meta	DNAmTIMP1AdjAge	CD8.naive	-0.0647585	0.0123274	1.49454e-07	6.82549
384	FHS	DNAmTIMP1AdjAge	CD8T	-0.230403	0.0497879	5.0729e-06	5.29474
1097	JHS	DNAmTIMP1AdjAge	CD8T	-0.149121	0.029882	7.00705e-07	6.15446
791	InChianti	DNAmTIMP1AdjAge	CD8T	-0.137121	0.0352647	0.00010943	3.96086
384	BLSA	DNAmTIMP1AdjAge	CD8T	-0.188337	0.0502488	0.000205726	3.68671
401	LBC21	DNAmTIMP1AdjAge	CD8T	-0.0335613	0.0500344	0.502758	0.298641
1355	LBC36	DNAmTIMP1AdjAge	CD8T	0.00640874	0.0271858	0.813671	0.0895509
998	WHI BA23 White	DNAmTIMP1AdjAge	CD8T	-0.145558	0.0313487	3.88953e-06	5.4101
676	WHI BA23 AfricanA	DNAmTIMP1AdjAge	CD8T	-0.117923	0.0382498	0.00213307	2.671
433	WHI BA23 Hispanic	DNAmTIMP1AdjAge	CD8T	-0.0685128	0.0480551	0.154675	0.81058
6519	Meta	DNAmTIMP1AdjAge	CD8T	-0.107097	0.0122998	3.11384e-18	17.5067
384	FHS	DNAmTIMP1AdjAge	CD8.ex	0.237949	0.0496949	2.41092e-06	5.61782
1097	JHS	DNAmTIMP1AdjAge	CD8.ex	0.110555	0.0300346	0.000243725	3.6131
791	InChianti	DNAmTIMP1AdjAge	CD8.ex	0.0216703	0.0355926	0.542804	0.265357
384	BLSA	DNAmTIMP1AdjAge	CD8.ex	0.0551805	0.0510865	0.280762	0.551662
401	LBC21	DNAmTIMP1AdjAge	CD8.ex	-0.0349332	0.0500321	0.485448	0.313857
1355	LBC36	DNAmTIMP1AdjAge	CD8.ex	0.0777795	0.027104	0.00417292	2.37956
998	WHI BA23 White	DNAmTIMP1AdjAge	CD8.ex	0.148353	0.0313356	2.516e-06	5.59929
676	WHI BA23 AfricanA	DNAmTIMP1AdjAge	CD8.ex	0.141439	0.0381313	0.000224979	3.64786
433	WHI BA23 Hispanic	DNAmTIMP1AdjAge	CD8.ex	0.201551	0.0471798	2.38591e-05	4.62235
6519	Meta	DNAmTIMP1AdjAge	CD8.ex	0.104206	0.0123071	2.51525e-17	16.5994
384	FHS	DNAmTIMP1AdjAge	NK	-0.197551	0.0501561	9.73712e-05	4.01157
1097	JHS	DNAmTIMP1AdjAge	NK	-0.0707581	0.0301441	0.0190862	1.71928
791	InChianti	DNAmTIMP1AdjAge	NK	-0.20249	0.0348634	9.16063e-09	8.03807
384	BLSA	DNAmTIMP1AdjAge	NK	-0.100784	0.0509039	0.0484333	1.31486
401	LBC21	DNAmTIMP1AdjAge	NK	-0.24332	0.048558	8.15639e-07	6.0885
1355	LBC36	DNAmTIMP1AdjAge	NK	-0.129623	0.026957	1.69051e-06	5.77198
998	WHI BA23 White	DNAmTIMP1AdjAge	NK	-0.12434	0.0314403	8.20227e-05	4.08607
676	WHI BA23 AfricanA	DNAmTIMP1AdjAge	NK	-0.0999294	0.0383258	0.00932601	2.0303
433	WHI BA23 Hispanic	DNAmTIMP1AdjAge	NK	-0.146491	0.0476487	0.00224334	2.64911
6519	Meta	DNAmTIMP1AdjAge	NK	-0.135818	0.0122722	1.81165e-28	27.7419
384	FHS	DNAmTIMP1AdjAge	PB	0.439647	0.0459544	1.39956e-19	18.854
1097	JHS	DNAmTIMP1AdjAge	PB	0.214654	0.0295155	6.7022e-13	12.1738
791	InChianti	DNAmTIMP1AdjAge	PB	0.387612	0.0328178	9.30341e-30	29.0314
384	BLSA	DNAmTIMP1AdjAge	PB	0.23377	0.0497468	3.65098e-06	5.43759
401	LBC21	DNAmTIMP1AdjAge	PB	0.296476	0.0478118	1.40356e-09	8.85277
1355	LBC36	DNAmTIMP1AdjAge	PB	0.349174	0.0254752	3.89721e-40	39.4092
998	WHI BA23 White	DNAmTIMP1AdjAge	PB	0.392823	0.0291391	3.60874e-38	37.4426
676	WHI BA23 AfricanA	DNAmTIMP1AdjAge	PB	0.283542	0.0369377	5.77035e-14	13.2388
433	WHI BA23 Hispanic	DNAmTIMP1AdjAge	PB	0.37237	0.0447042	1.09053e-15	14.9624
6519	Meta	DNAmTIMP1AdjAge	PB	0.331382	0.0116695	2.18838e-177	176.66
384	FHS	DNAmTIMP1AdjAge	Mono	0.0913281	0.0509506	0.0738468	1.13167
1097	JHS	DNAmTIMP1AdjAge	Mono	0.0678155	0.0301503	0.024695	1.60739
791	InChianti	DNAmTIMP1AdjAge	Mono	0.0380125	0.0355752	0.285617	0.544216
384	BLSA	DNAmTIMP1AdjAge	Mono	0.149505	0.0505894	0.00331774	2.47916
401	LBC21	DNAmTIMP1AdjAge	Mono	0.00965601	0.0500603	0.847145	0.0720422
1355	LBC36	DNAmTIMP1AdjAge	Mono	-0.0161112	0.0271828	0.553483	0.256896
998	WHI BA23 White	DNAmTIMP1AdjAge	Mono	0.0384387	0.0316628	0.225034	0.647752
676	WHI BA23 AfricanA	DNAmTIMP1AdjAge	Mono	0.063089	0.0384418	0.101232	0.994683
433	WHI BA23 Hispanic	DNAmTIMP1AdjAge	Mono	0.111962	0.0478654	0.0197859	1.70364
6519	Meta	DNAmTIMP1AdjAge	Mono	0.0475075	0.0123757	0.000123657	3.90778
384	FHS	DNAmTIMP1AdjAge	Gran	0.536622	0.0431737	5.08388e-30	29.2938
1097	JHS	DNAmTIMP1AdjAge	Gran	0.274085	0.0290626	2.34754e-20	19.6294
791	InChianti	DNAmTIMP1AdjAge	Gran	0.467891	0.0314636	2.81228e-44	43.5509
384	BLSA	DNAmTIMP1AdjAge	Gran	0.324919	0.0483884	6.83674e-11	10.1652
401	LBC21	DNAmTIMP1AdjAge	Gran	0.380263	0.0463018	3.03843e-15	14.5174
1355	LBC36	DNAmTIMP1AdjAge	Gran	0.445809	0.0243353	3.8577e-67	66.4137
998	WHI BA23 White	DNAmTIMP1AdjAge	Gran	0.397105	0.0290808	4.85141e-39	38.3141
676	WHI BA23 AfricanA	DNAmTIMP1AdjAge	Gran	0.292053	0.0368392	9.27002e-15	14.0329
433	WHI BA23 Hispanic	DNAmTIMP1AdjAge	Gran	0.441936	0.0432092	3.9655e-22	21.4017
6519	Meta	DNAmTIMP1AdjAge	Gran	0.395929	0.0113463	8.88371e-267	266.051
384	FHS	DNAmPACKYRSAdjAge	Bcell	-0.121546	0.0507851	0.0171779	1.76503
1097	JHS	DNAmPACKYRSAdjAge	Bcell	-0.0543145	0.0301753	0.0721413	1.14182
791	InChianti	DNAmPACKYRSAdjAge	Bcell	-0.035264	0.0355788	0.321915	0.492259
384	BLSA	DNAmPACKYRSAdjAge	Bcell	0.110629	0.0508504	0.0301991	1.52001
401	LBC21	DNAmPACKYRSAdjAge	Bcell	0.0621982	0.0499657	0.213929	0.669731
1355	LBC36	DNAmPACKYRSAdjAge	Bcell	-0.0561331	0.0271435	0.0388284	1.41085
998	WHI BA23 White	DNAmPACKYRSAdjAge	Bcell	-0.00390374	0.031686	0.901973	0.0448066
676	WHI BA23 AfricanA	DNAmPACKYRSAdjAge	Bcell	-0.00756549	0.0385175	0.844343	0.0734812
433	WHI BA23 Hispanic	DNAmPACKYRSAdjAge	Bcell	-0.0167723	0.0481615	0.727822	0.137975
6519	Meta	DNAmPACKYRSAdjAge	Bcell	-0.024433	0.0123828	0.0484803	1.31443
384	FHS	DNAmPACKYRSAdjAge	CD4T	-0.0982049	0.0509171	0.0545062	1.26355
1097	JHS	DNAmPACKYRSAdjAge	CD4T	-0.0513862	0.03018	0.0889157	1.05102
791	InChianti	DNAmPACKYRSAdjAge	CD4T	-0.0559716	0.0355451	0.115735	0.936534
384	BLSA	DNAmPACKYRSAdjAge	CD4T	0.0685363	0.0510441	0.180171	0.744316
401	LBC21	DNAmPACKYRSAdjAge	CD4T	-0.0222713	0.0500502	0.656576	0.182715
1355	LBC36	DNAmPACKYRSAdjAge	CD4T	-0.0541874	0.0271464	0.0461215	1.3361
998	WHI BA23 White	DNAmPACKYRSAdjAge	CD4T	0.0224347	0.0316782	0.478983	0.31968
676	WHI BA23 AfricanA	DNAmPACKYRSAdjAge	CD4T	-0.0290579	0.0385023	0.450689	0.346123
433	WHI BA23 Hispanic	DNAmPACKYRSAdjAge	CD4T	-0.00499519	0.0481677	0.917452	0.0374165
6519	Meta	DNAmPACKYRSAdjAge	CD4T	-0.0297848	0.0123871	0.0161946	1.79063
384	FHS	DNAmPACKYRSAdjAge	CD4.naive	0.055803	0.0510847	0.275363	0.560095
1097	JHS	DNAmPACKYRSAdjAge	CD4.naive	-0.0384212	0.0301976	0.203527	0.691379
791	InChianti	DNAmPACKYRSAdjAge	CD4.naive	0.0626749	0.035531	0.0781269	1.1072
384	BLSA	DNAmPACKYRSAdjAge	CD4.naive	0.0350244	0.0511331	0.493781	0.306466
401	LBC21	DNAmPACKYRSAdjAge	CD4.naive	0.0334015	0.0500347	0.504796	0.296884
1355	LBC36	DNAmPACKYRSAdjAge	CD4.naive	-0.0158349	0.027183	0.560306	0.251574
998	WHI BA23 White	DNAmPACKYRSAdjAge	CD4.naive	0.0717478	0.0316046	0.0234101	1.6306
676	WHI BA23 AfricanA	DNAmPACKYRSAdjAge	CD4.naive	-0.053379	0.0384636	0.165663	0.780774
433	WHI BA23 Hispanic	DNAmPACKYRSAdjAge	CD4.naive	0.0323159	0.0481431	0.502423	0.29893
6519	Meta	DNAmPACKYRSAdjAge	CD4.naive	0.012876	0.0123885	0.298642	0.524849
384	FHS	DNAmPACKYRSAdjAge	CD8.naive	-0.0903351	0.0509553	0.0770533	1.11321
1097	JHS	DNAmPACKYRSAdjAge	CD8.naive	-0.114568	0.0300209	0.000143061	3.84448
791	InChianti	DNAmPACKYRSAdjAge	CD8.naive	-0.103012	0.0354115	0.0037278	2.42855
384	BLSA	DNAmPACKYRSAdjAge	CD8.naive	-0.115067	0.0508246	0.0241342	1.61737
401	LBC21	DNAmPACKYRSAdjAge	CD8.naive	-0.147385	0.0495159	0.00309297	2.50962
1355	LBC36	DNAmPACKYRSAdjAge	CD8.naive	-0.204188	0.0266136	3.21457e-14	13.4929
998	WHI BA23 White	DNAmPACKYRSAdjAge	CD8.naive	-0.115463	0.0314743	0.000256921	3.5902
676	WHI BA23 AfricanA	DNAmPACKYRSAdjAge	CD8.naive	-0.212643	0.0376376	2.37139e-08	7.625
433	WHI BA23 Hispanic	DNAmPACKYRSAdjAge	CD8.naive	-0.140773	0.0476886	0.00333064	2.47747
6519	Meta	DNAmPACKYRSAdjAge	CD8.naive	-0.145108	0.012259	2.51603e-32	31.5993
384	FHS	DNAmPACKYRSAdjAge	CD8T	-0.0101021	0.0511618	0.843578	0.0738747
1097	JHS	DNAmPACKYRSAdjAge	CD8T	-0.0158242	0.0302161	0.600592	0.221421
791	InChianti	DNAmPACKYRSAdjAge	CD8T	0.00104512	0.0356009	0.976588	0.0102888
384	BLSA	DNAmPACKYRSAdjAge	CD8T	0.120043	0.0507945	0.0186129	1.73019
401	LBC21	DNAmPACKYRSAdjAge	CD8T	0.15911	0.0494249	0.00139053	2.85682
1355	LBC36	DNAmPACKYRSAdjAge	CD8T	-0.0581961	0.0271403	0.032189	1.49229
998	WHI BA23 White	DNAmPACKYRSAdjAge	CD8T	0.0631318	0.031623	0.0461636	1.3357
676	WHI BA23 AfricanA	DNAmPACKYRSAdjAge	CD8T	0.0586019	0.0384524	0.127975	0.892876
433	WHI BA23 Hispanic	DNAmPACKYRSAdjAge	CD8T	0.0418183	0.0481262	0.385368	0.414124
6519	Meta	DNAmPACKYRSAdjAge	CD8T	0.0203873	0.012376	0.0994911	1.00222
384	FHS	DNAmPACKYRSAdjAge	CD8.ex	0.159261	0.0505114	0.00174387	2.75849
1097	JHS	DNAmPACKYRSAdjAge	CD8.ex	0.0838345	0.0301135	0.00546257	2.2626
791	InChianti	DNAmPACKYRSAdjAge	CD8.ex	0.0529975	0.0355509	0.136427	0.865099
384	BLSA	DNAmPACKYRSAdjAge	CD8.ex	0.00196051	0.0511644	0.969454	0.0134727
401	LBC21	DNAmPACKYRSAdjAge	CD8.ex	0.102746	0.0497977	0.0397331	1.40085
1355	LBC36	DNAmPACKYRSAdjAge	CD8.ex	0.156847	0.0268499	6.46708e-09	8.18929
998	WHI BA23 White	DNAmPACKYRSAdjAge	CD8.ex	0.0401161	0.0316607	0.205429	0.687338
676	WHI BA23 AfricanA	DNAmPACKYRSAdjAge	CD8.ex	0.142599	0.0381249	0.000199421	3.70023
433	WHI BA23 Hispanic	DNAmPACKYRSAdjAge	CD8.ex	0.0748205	0.0480333	0.120043	0.920663
6519	Meta	DNAmPACKYRSAdjAge	CD8.ex	0.0953438	0.0123304	1.05499e-14	13.9768
384	FHS	DNAmPACKYRSAdjAge	NK	-0.177973	0.0503476	0.000458	3.33913
1097	JHS	DNAmPACKYRSAdjAge	NK	-0.0986517	0.0300725	0.00106903	2.97101
791	InChianti	DNAmPACKYRSAdjAge	NK	-0.191357	0.0349431	5.84251e-08	7.2334
384	BLSA	DNAmPACKYRSAdjAge	NK	-0.0671052	0.0510491	0.189459	0.722484
401	LBC21	DNAmPACKYRSAdjAge	NK	-0.0324505	0.0500363	0.517009	0.286502
1355	LBC36	DNAmPACKYRSAdjAge	NK	-0.0330734	0.0271715	0.223737	0.650263
998	WHI BA23 White	DNAmPACKYRSAdjAge	NK	-0.105396	0.0315097	0.000853891	3.0686
676	WHI BA23 AfricanA	DNAmPACKYRSAdjAge	NK	-0.0352329	0.0384946	0.360379	0.443241
433	WHI BA23 Hispanic	DNAmPACKYRSAdjAge	NK	-0.0325322	0.0481428	0.499565	0.301408
6519	Meta	DNAmPACKYRSAdjAge	NK	-0.0857624	0.0123369	3.6089e-12	11.4426
384	FHS	DNAmPACKYRSAdjAge	PB	0.169655	0.0504227	0.000844005	3.07365
1097	JHS	DNAmPACKYRSAdjAge	PB	0.0466671	0.030187	0.122409	0.912186
791	InChianti	DNAmPACKYRSAdjAge	PB	0.0539771	0.035549	0.129318	0.888341
384	BLSA	DNAmPACKYRSAdjAge	PB	-0.11197	0.0508427	0.0282424	1.5491
401	LBC21	DNAmPACKYRSAdjAge	PB	-0.0411882	0.0500201	0.410754	0.386418
1355	LBC36	DNAmPACKYRSAdjAge	PB	0.0617986	0.0271344	0.0229118	1.63994
998	WHI BA23 White	DNAmPACKYRSAdjAge	PB	0.0259837	0.0316755	0.412237	0.384853
676	WHI BA23 AfricanA	DNAmPACKYRSAdjAge	PB	0.00507248	0.0385181	0.895268	0.0480469
433	WHI BA23 Hispanic	DNAmPACKYRSAdjAge	PB	0.0307765	0.0481455	0.523006	0.281493
6519	Meta	DNAmPACKYRSAdjAge	PB	0.0348306	0.0123761	0.00488748	2.31091
384	FHS	DNAmPACKYRSAdjAge	Mono	-0.0512228	0.0510973	0.316758	0.499273
1097	JHS	DNAmPACKYRSAdjAge	Mono	0.0300264	0.0302063	0.320421	0.494279
791	InChianti	DNAmPACKYRSAdjAge	Mono	-0.0358678	0.035578	0.313695	0.503493
384	BLSA	DNAmPACKYRSAdjAge	Mono	-0.000692316	0.0511644	0.989211	0.00471103
401	LBC21	DNAmPACKYRSAdjAge	Mono	-0.0562963	0.0499832	0.260714	0.583836
1355	LBC36	DNAmPACKYRSAdjAge	Mono	0.029869	0.0271742	0.271891	0.565605
998	WHI BA23 White	DNAmPACKYRSAdjAge	Mono	-0.0600843	0.031629	0.0577663	1.23833
676	WHI BA23 AfricanA	DNAmPACKYRSAdjAge	Mono	-0.0200798	0.0385108	0.602254	0.220221
433	WHI BA23 Hispanic	DNAmPACKYRSAdjAge	Mono	-0.0244984	0.0481538	0.611186	0.213826
6519	Meta	DNAmPACKYRSAdjAge	Mono	-0.0125273	0.0123933	0.312108	0.505696
384	FHS	DNAmPACKYRSAdjAge	Gran	0.195665	0.0501755	0.000113802	3.94385
1097	JHS	DNAmPACKYRSAdjAge	Gran	0.0726916	0.0301399	0.0160376	1.79486
791	InChianti	DNAmPACKYRSAdjAge	Gran	0.128539	0.0353056	0.000289575	3.53824
384	BLSA	DNAmPACKYRSAdjAge	Gran	-0.120988	0.0507886	0.0176987	1.75206
401	LBC21	DNAmPACKYRSAdjAge	Gran	-0.0468675	0.0500076	0.349219	0.456902
1355	LBC36	DNAmPACKYRSAdjAge	Gran	0.0931542	0.0270681	0.000596196	3.22461
998	WHI BA23 White	DNAmPACKYRSAdjAge	Gran	0.0241375	0.031677	0.446248	0.350424
676	WHI BA23 AfricanA	DNAmPACKYRSAdjAge	Gran	0.00800309	0.0385173	0.835464	0.0780721
433	WHI BA23 Hispanic	DNAmPACKYRSAdjAge	Gran	0.000192814	0.0481683	0.996808	0.00138849
6519	Meta	DNAmPACKYRSAdjAge	Gran	0.0536882	0.012352	1.3831e-05	4.85915
